# Supplementary material for: Direct synthesis of N-perfluoro-tert-butyl secondary amines from N-trifluoromethyl secondary amines
Source: Royal Society of Chemistry journal article supplement (doi:10.1039/d4sc06335j), 2024-01-01

## Supplementary Information

### Direct synthesis of *N*-perfluoro-*tert*-butyl secondary amines from *N*-trifluoromethyl secondary amines

Leibing Wang,<sup>a</sup> Zhongyu Feng,<sup>a</sup> Zhen Luo,<sup>a</sup> Zihao Guo,<sup>\*a</sup> Jieping Wang <sup>\*a</sup>

and Wenbin Yi <sup>\*ab</sup>

<sup>a</sup> School of Chemistry and Chemical Engineering, Nanjing University of Science and  
Technology, Nanjing 210094, China.

<sup>b</sup> Key Laboratory of Organofluorine Chemistry, Shanghai Institute Organic Chemistry,  
Chinese Academy of Sciences, Shanghai 200032 (China).

E-mail: zihao\_guo@njjust.edu.cn; jieping.wang@njjust.edu.cn; yiw@njjust.edu.cn

## Table of Contents

|                                                                                                 |     |
|-------------------------------------------------------------------------------------------------|-----|
| <b>1. General information</b> .....                                                             | S3  |
| <b>2. Study of condition optimization and reaction path</b> .....                               | S4  |
| <b>3. Density functional theory (DFT) study and calculational details</b> .....                 | S12 |
| <b>4. General procedure for the synthesis of <i>N</i>-CF<sub>3</sub> secondary amines</b> ..... | S24 |
| <b>5. General procedure for <i>N</i>-perfluoro-<i>tert</i>-butyl secondary amines</b> .....     | S27 |
| <b>6. Derivative reactions</b> .....                                                            | S35 |
| <b>7. Stability study of compound 1</b> .....                                                   | S42 |
| <b>8. <sup>19</sup>F MRI Experiment</b> .....                                                   | S44 |
| <b>9. Crystallographic data for compound 11</b> .....                                           | S45 |
| <b>10. References</b> .....                                                                     | S46 |
| <b>11. NMR Spectra</b> .....                                                                    | S47 |

## 1. General information

Unless otherwise noted, all reactions were conducted in the oven- or flame-dried glassware under an atmosphere of nitrogen, all reagents and starting materials were purchased from commercial sources and used without further purification. All known compounds are identified by appropriate techniques such as  $^1\text{H}$  NMR,  $^{13}\text{C}$  NMR,  $^{19}\text{F}$  NMR, and compared with previously reported data. All unknown compounds are characterized by  $^1\text{H}$  NMR,  $^{13}\text{C}$  NMR,  $^{19}\text{F}$  NMR, and HRMS.  $^1\text{H}$ ,  $^{13}\text{C}$ , and  $^{19}\text{F}$  NMR spectra were recorded on a 500 MHz Bruker DRX 500. Chemical shifts were reported in parts per million (ppm), and the residual solvent peak was used as an internal reference: proton (chloroform  $\delta$  7.26), carbon (chloroform  $\delta$  77.0). The following abbreviations were used to explain the multiplicities: s = singlet, d = doublet, t = triplet, q = quartet, and m = multiplet. GC-MS data were recorded on an ISQ LT Single Quadrupole Mass Spectrometer, coupled with a Trace 1300 Gas Chromatograph (Thermo Fisher Scientific). Melting points were measured on a melting point apparatus (HMX-1B) and were uncorrected. High-resolution mass spectral data were acquired on Agilent Technologies 7250 GCQTOF (electro ionization: EI) and JEOL-AccuTOF-GCv4G-GCT MS (FI). The  $^{19}\text{F}$  MRI data were recorded on a Bruker 9.4 T BioSpec 94/30 MRI & PET Insert.

## 2. Study of condition optimization and reaction path

The variation in CsF dosage resulted in decreased yield, attributed to the formation or increased quantity of by-products. When 0.5 equivalents of CsF was used (entry 13), a dimer was produced during the reaction (Supplementary Figure S1). When 3.0 equivalents of CsF were employed (entry 12), there was a notable increase in by-products compared to the conditions using 1.5 equivalents (entry 11) (Supplementary Figure S2 and S3).

| entry     | TMSCF <sub>3</sub> (equiv) | Additive (equiv)   | Solvent    | Yield (%) <sup>b</sup> |
|-----------|----------------------------|--------------------|------------|------------------------|
| 1         | 8                          | KF (1)             | THF        | 33                     |
| 2         | 8                          | KF (3)             | THF        | 38                     |
| 3         | 8                          | KF (5), CuCl (1.0) | THF        | 54                     |
| 4         | 8                          | KF (3), CuCl (1.0) | THF        | 47                     |
| 5         | 10                         | KF (5)             | THF        | 43                     |
| 6         | 10                         | KF (3)             | THF        | 42                     |
| 7         | 8                          | \                  | THF        | 0                      |
| 8         | 8                          | NaF (3.0)          | THF        | 0                      |
| 9         | 8                          | TBAF (3.0)         | THF        | 0                      |
| 10        | 8                          | CsF (1.0)          | THF        | 65                     |
| 11        | 8                          | CsF (1.5)          | THF        | 73                     |
| 12        | 8                          | CsF (3.0)          | THF        | 67                     |
| 13        | 8                          | CsF (0.5)          | THF        | 60                     |
| 14        | 8                          | CsF (1.5)          | DCM        | 23                     |
| 15        | 8                          | CsF (1.5)          | MeCN       | 41                     |
| <b>16</b> | <b>6</b>                   | <b>CsF (1.5)</b>   | <b>THF</b> | <b>76</b>              |
| 17        | 10                         | CsF (3.0)          | THF        | 57                     |



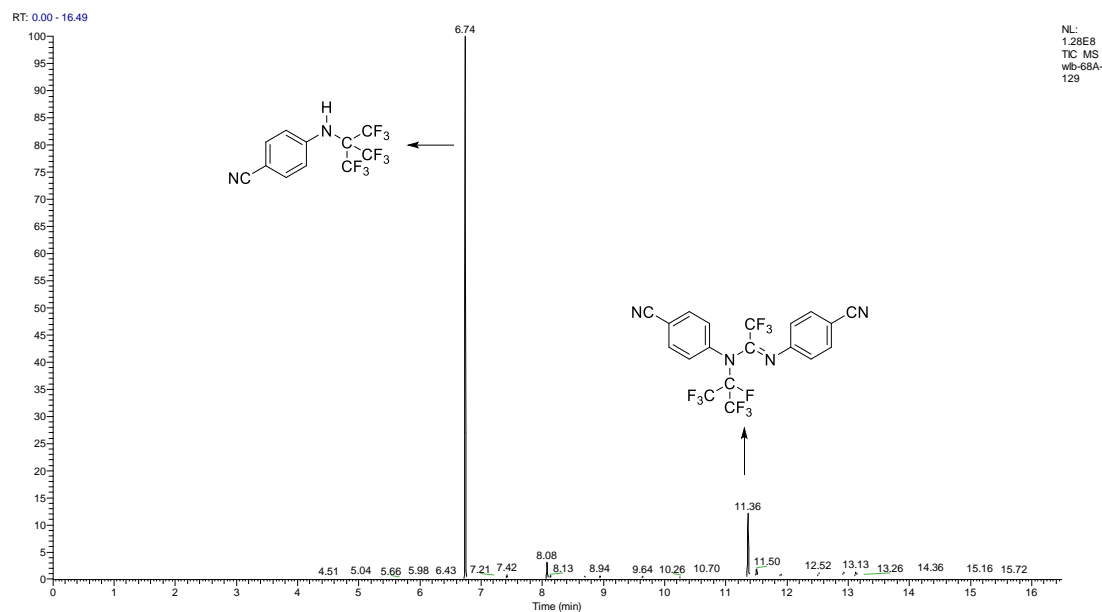

**Supplementary Figure S1. Reaction results from GC-MS analysis with the addition of 0.5 equivalents of CsF (entry 13).**

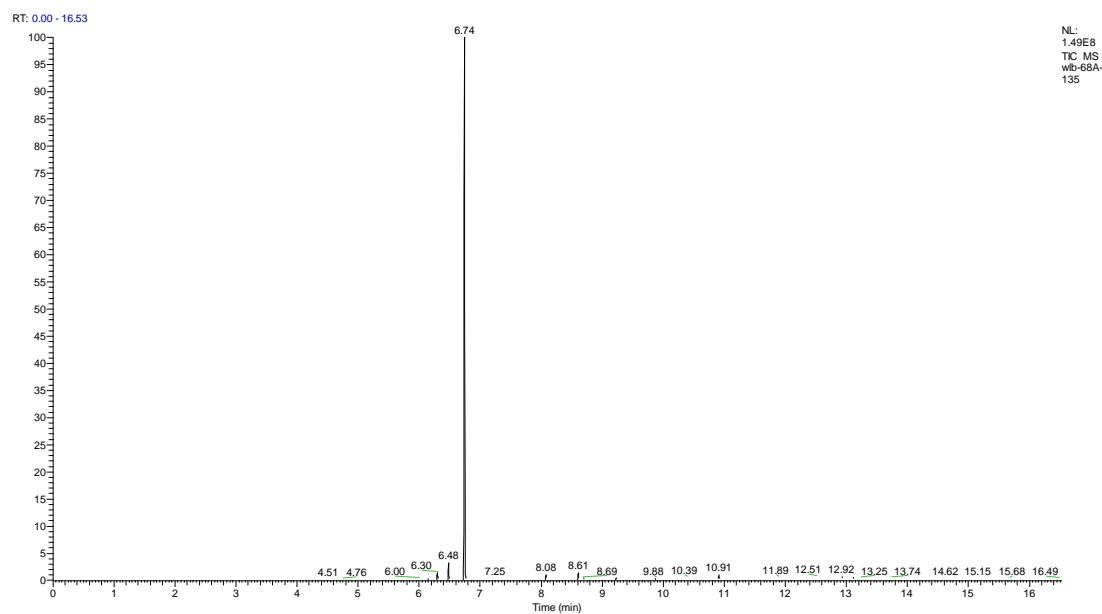

**Supplementary Figure S2. Reaction results from GC-MS analysis with the addition of 1.5 equivalents of CsF (entry 11).**

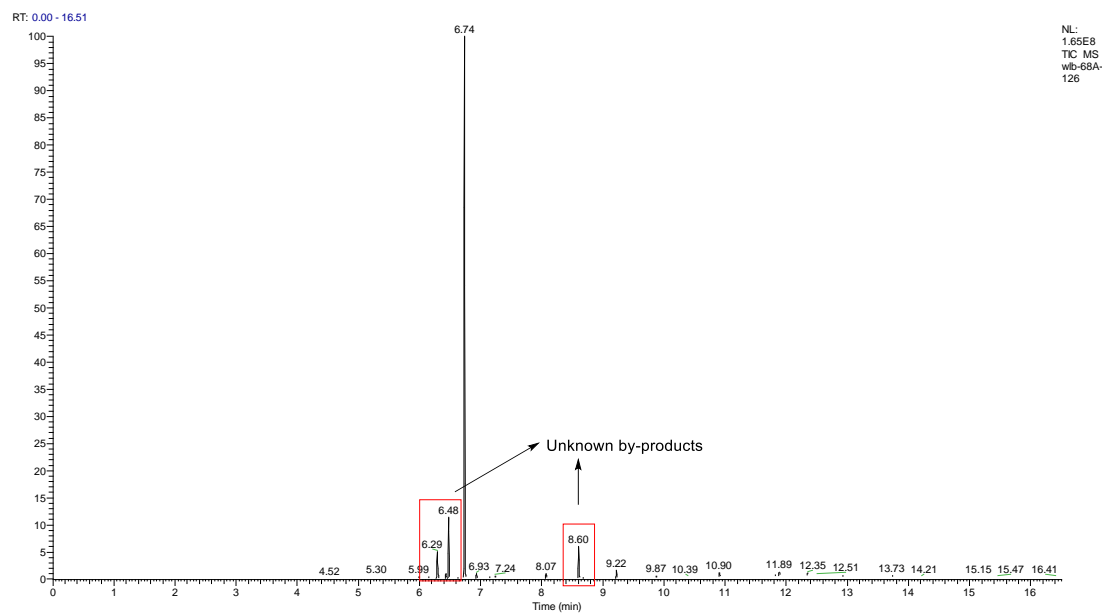

**Supplementary Figure S3. Reaction results from GC-MS analysis with the addition of 3.0 equivalents of CsF (entry 12).**

The  $\text{HCF}_3$  signal was detected by  $^{19}\text{F}$  NMR under reaction conditions without a substrate (4.8 mmol  $\text{TMSCF}_3$ , 1.2 mmol  $\text{CsF}$ , 4.0 mL dry THF, 0.5 h), using 0.8 mmol of trifluorotoluene as an internal standard. We found that a very small amount of  $\text{HCF}_3$  (7%) was generated (Supplementary Figure S4). In contrast, when the substrate (0.8 mmol) was included in the reaction for 0.5 hours, 51% of  $\text{HCF}_3$  remained while the final product was formed (Supplementary Figure S5). This indicates that the vast majority of  $\text{HCF}_3$  produced during the reaction is sourced from the substrate, with only a minor portion arising from the solvent THF.

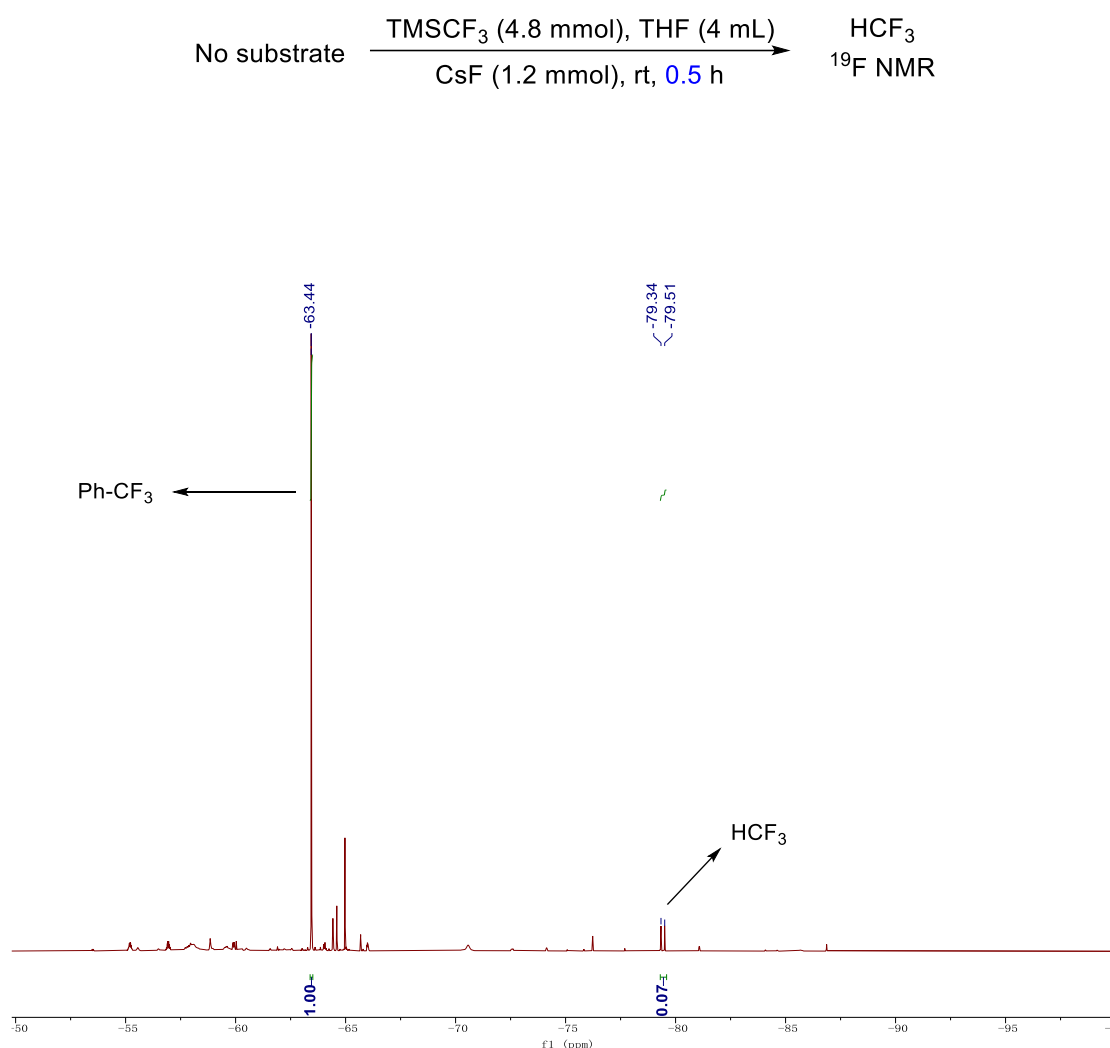

**Supplementary Figure S4.  $^{19}\text{F}$  NMR detection of  $\text{HCF}_3$  in the absence of substrate.**

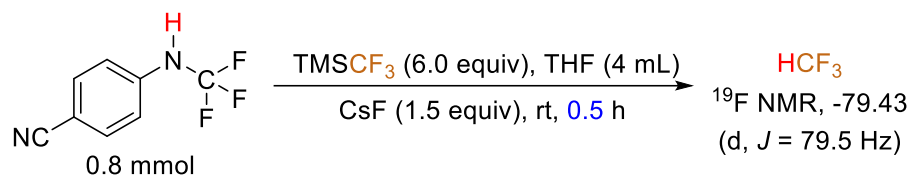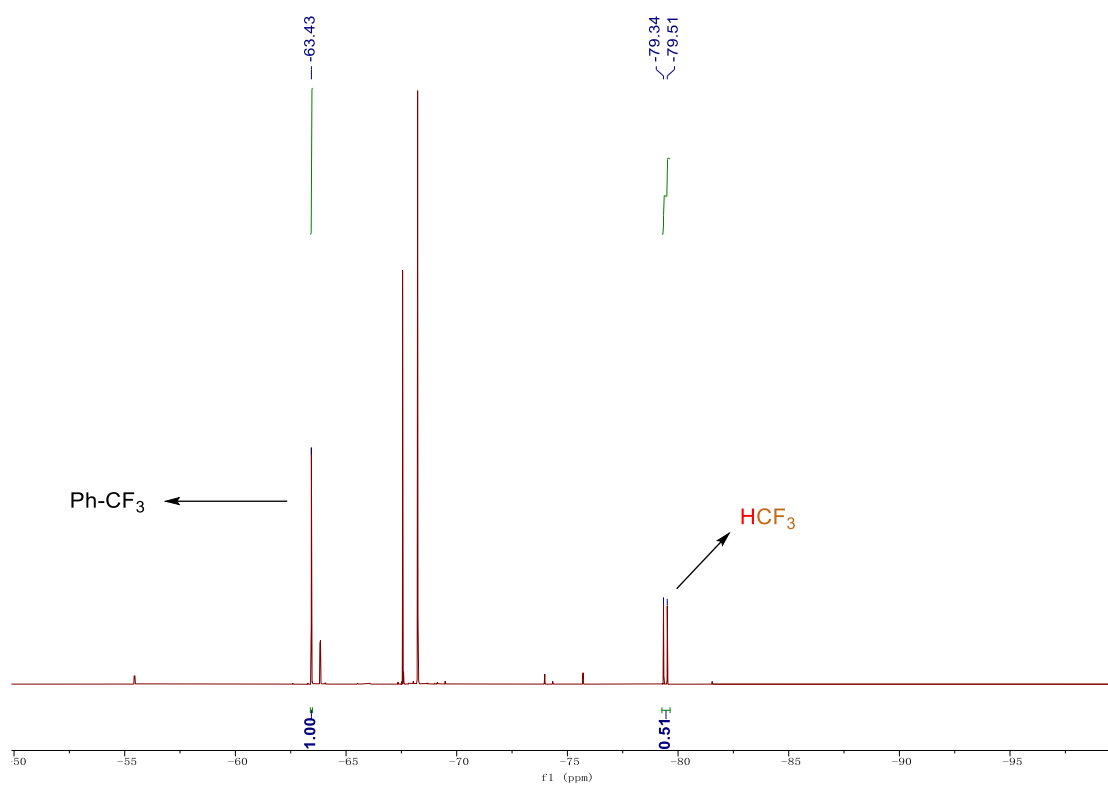

Supplementary Figure S5.  $^{19}\text{F}$  NMR detection of HCF<sub>3</sub> in the presence of substrate.

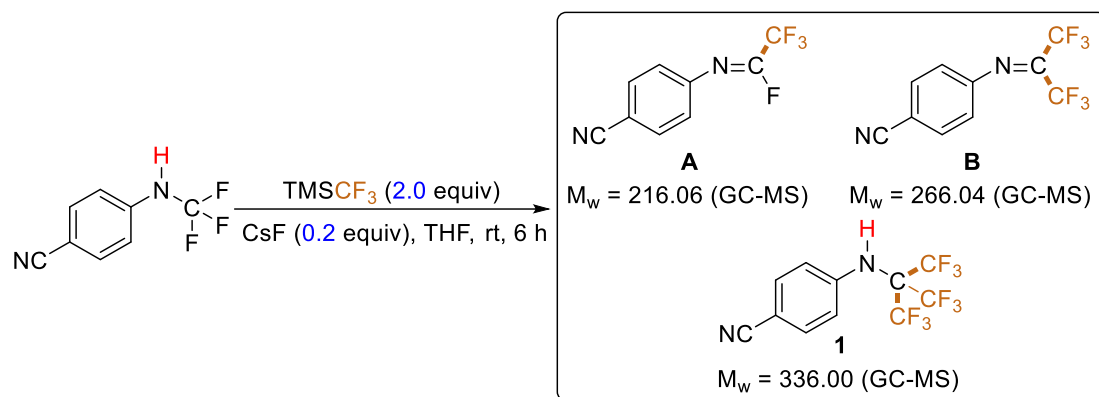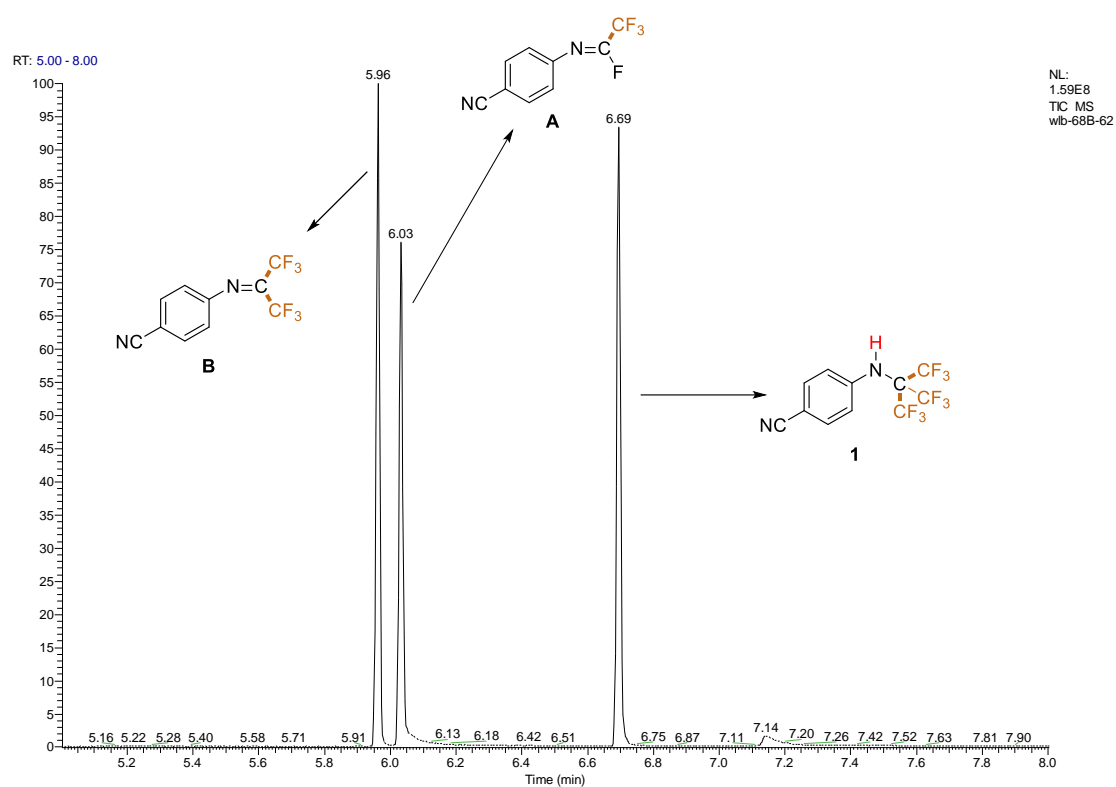

**Supplementary Figure S6. The mixed products of mono-, di-, and tri-substituted trifluoromethylation.**

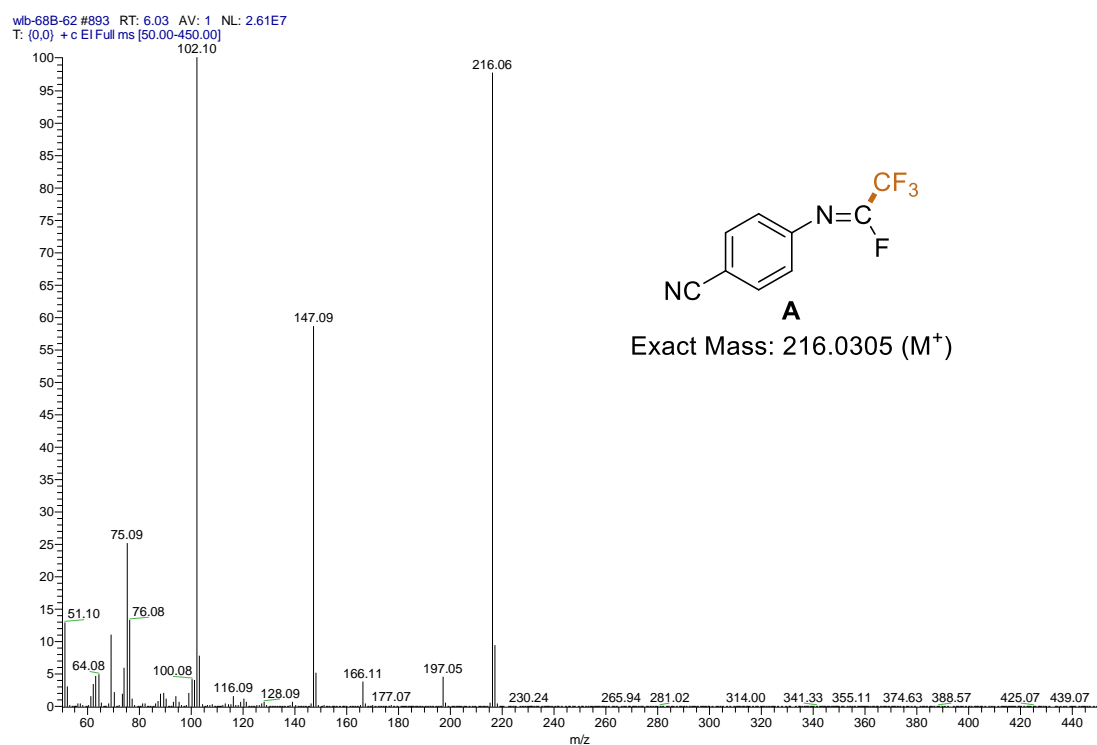

Supplementary Figure S7. The mass spectrum of compound A from GC-MS.

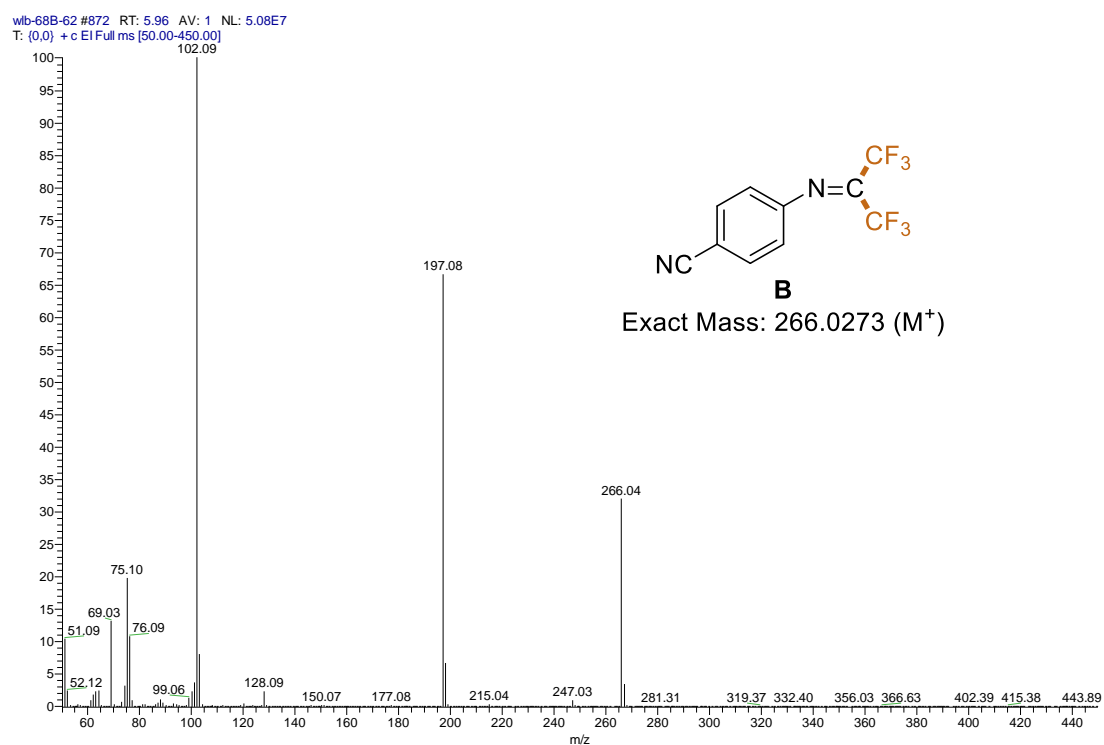

Supplementary Figure S8. The mass spectrum of compound B from GC-MS.

wb-68B-62 #1087 RT: 6.69 AV: 1 NL: 2.68E7  
T: (0.0) + c EI Full ms [50.00-450.00]

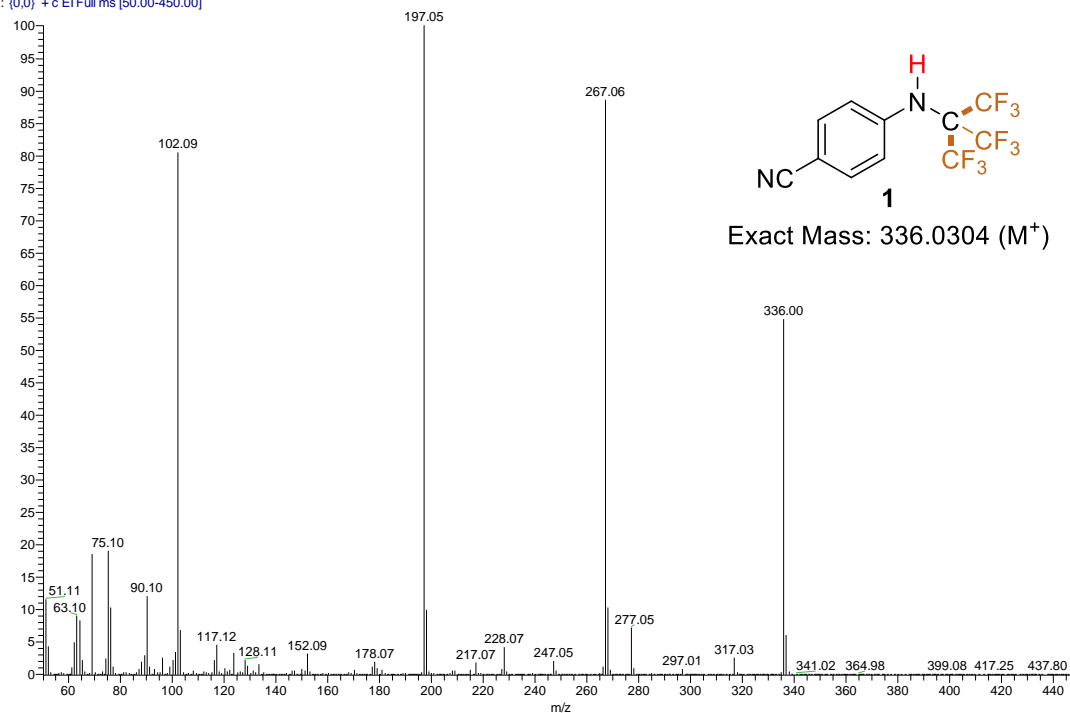

**Supplementary Figure S9. The mass spectrum of compound 1 from GC-MS.**

### 3. Density functional theory (DFT) study and calculational details

In the DFT reaction mechanism study, we used Gaussian 16, Revision A.01<sup>1</sup>. Geometry optimizations of all involved compounds were conducted with the PBE0 functional<sup>2</sup> (Integral grid precision is ultrafine) in combination with the D3BJ dispersion correction<sup>3</sup> and the def2-TZVP basis set<sup>4</sup>, which is suitable for organic systems of metal K and Cs. The solvation effects of tetrahydrofuran were considered during geometry optimizations using the SMD<sup>5</sup> solvation model. Frequency calculations were carried out at the same theoretical level as for geometry optimization to verify that the stationary points of compound structures on the potential energy surface are either minima (no imaginary frequencies) or first-order saddle points (only one imaginary frequency), as well as to obtain thermal Gibbs free energy corrections. Furthermore, Intrinsic reaction coordinate (IRC) calculations were performed to ensure that the first-order saddle points found were true transition states (TS).

It is determined through TS, QST2, QST3, and relaxed scan that there is no suitable transition state in the reaction process from **IM-1** to the product. This may be due to the large Cs atom causing the bond length to be too long and the small H atom causing the bond length to be too short, resulting in no significant energy barrier change on the potential energy surface. All Gibbs free energy obtained using the implicit solvent model was added with a correction of 1.89 kcal/mol corresponding to the 1M standard state.



4-cyanophenyl *N*-trifluoromethyl secondary amine

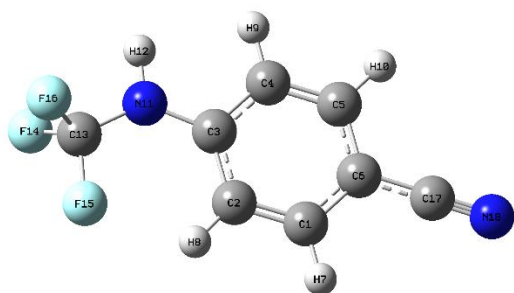

|   |             |             |             |
|---|-------------|-------------|-------------|
| C | 1.75228200  | -1.10552900 | 0.00000300  |
| C | 0.38539300  | -0.91265100 | 0.00001200  |
| C | -0.13680000 | 0.38462500  | 0.00001200  |
| C | 0.75064000  | 1.47044000  | 0.00000300  |
| C | 2.11115200  | 1.27472500  | -0.00000400 |
| C | 2.63023300  | -0.02264500 | -0.00000400 |
| H | 2.14452400  | -2.11517900 | 0.00000500  |
| H | -0.25534500 | -1.77933500 | 0.00002200  |
| H | 0.35512300  | 2.48041600  | 0.00000200  |
| H | 2.78039100  | 2.12629900  | -0.00001000 |
| N | -1.48214100 | 0.70810000  | 0.00002400  |
| H | -1.69418800 | 1.69604600  | 0.00004900  |
| C | -2.62516800 | -0.07969100 | 0.00000100  |
| F | -3.40287700 | 0.18149100  | -1.06991200 |
| F | -2.37181700 | -1.38025900 | -0.00005700 |
| F | -3.40286100 | 0.18139700  | 1.06995000  |
| C | 4.03481000  | -0.23526700 | -0.00001200 |
| N | 5.17531800  | -0.40752200 | -0.00001800 |

TS

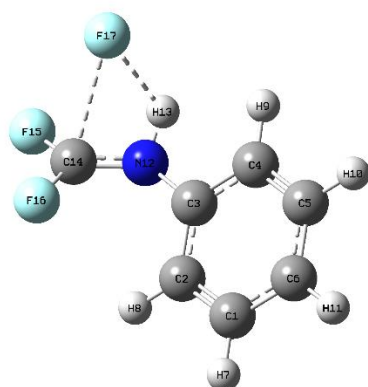

|   |             |             |             |
|---|-------------|-------------|-------------|
| C | 1.82843500  | -1.17205200 | -0.14944700 |
| C | 0.46318100  | -1.12309500 | -0.34664500 |
| C | -0.16837700 | 0.11264400  | -0.39361200 |

|   |             |             |             |
|---|-------------|-------------|-------------|
| C | 0.54406600  | 1.29801200  | -0.26843400 |
| C | 1.90949700  | 1.24812700  | -0.07642700 |
| C | 2.55267500  | 0.01210500  | -0.01230400 |
| H | 2.33817100  | -2.12621200 | -0.11129100 |
| H | -0.09722500 | -2.03996200 | -0.47942700 |
| H | 0.02585400  | 2.24867600  | -0.30535900 |
| H | 2.47889000  | 2.16270600  | 0.02877600  |
| N | -1.56008700 | 0.21037300  | -0.61801900 |
| H | -1.97277200 | 1.15979600  | -0.75330100 |
| C | -2.46779500 | -0.47361900 | -0.01289000 |
| F | -3.68256400 | -0.47014200 | -0.38034600 |
| F | -2.20426000 | -1.38023400 | 0.84126400  |
| F | -2.92585800 | 1.69182200  | 0.64367600  |
| C | 3.96274700  | -0.04227300 | 0.18738400  |
| N | 5.10217900  | -0.08710300 | 0.34852100  |

### CsF

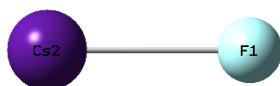

|    |            |            |             |
|----|------------|------------|-------------|
| F  | 0.00000000 | 0.00000000 | -2.25646600 |
| Cs | 0.00000000 | 0.00000000 | 0.36924000  |

### IM-1

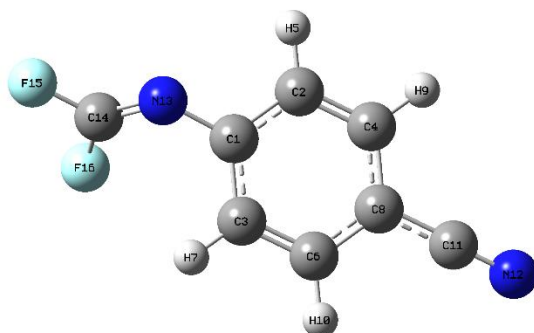

|   |             |             |             |
|---|-------------|-------------|-------------|
| C | -0.50622200 | 0.37558000  | 0.29758200  |
| C | 0.31187600  | 1.44005000  | -0.07544900 |
| C | 0.04885000  | -0.87801500 | 0.55017700  |
| C | 1.66947800  | 1.24883700  | -0.22746000 |
| H | -0.13058800 | 2.41365400  | -0.24736500 |
| C | 1.40879900  | -1.07029100 | 0.41215700  |
| H | -0.58600000 | -1.69734200 | 0.86585400  |
| C | 2.22374400  | -0.00904500 | 0.01647900  |

|   |             |             |             |
|---|-------------|-------------|-------------|
| H | 2.30718800  | 2.07121800  | -0.52714600 |
| H | 1.84482400  | -2.04204900 | 0.60845600  |
| C | 3.62538400  | -0.20768000 | -0.13100300 |
| N | 4.76017300  | -0.36865400 | -0.25163200 |
| N | -1.87031900 | 0.62780900  | 0.47877500  |
| C | -2.75595500 | -0.04306000 | -0.06295200 |
| F | -4.02485100 | 0.17444600  | 0.14075800  |
| F | -2.62182900 | -1.02975900 | -0.91486700 |

### CsHF<sub>2</sub>

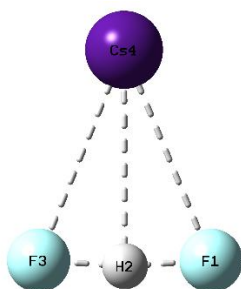

|    |             |             |            |
|----|-------------|-------------|------------|
| F  | 1.13095300  | -2.04957400 | 0.00000000 |
| H  | 0.00011900  | -2.12521200 | 0.00000000 |
| F  | -1.13096700 | -2.05000600 | 0.00000000 |
| Cs | 0.00000000  | 0.70948100  | 0.00000000 |

### CsCF<sub>3</sub>

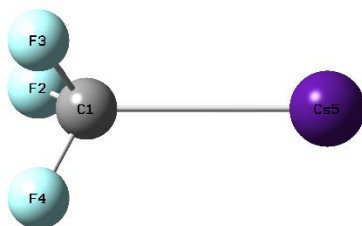

|    |             |             |             |
|----|-------------|-------------|-------------|
| C  | -1.82666900 | 0.00029500  | -0.00010400 |
| F  | -2.47388500 | 0.28071000  | -1.21983500 |
| F  | -2.47225600 | 0.91673600  | 0.85340300  |
| F  | -2.47067500 | -1.19821600 | 0.36715100  |
| Cs | 1.41293400  | 0.00009400  | -0.00010600 |

IM-2

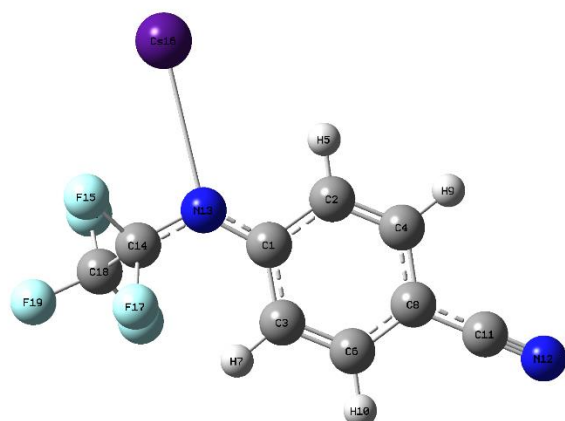

|    |             |             |             |
|----|-------------|-------------|-------------|
| C  | 1.28118300  | -0.02828600 | -0.26318800 |
| C  | 1.67291100  | -1.35023300 | 0.07781200  |
| C  | 2.33601100  | 0.90367400  | -0.45320700 |
| C  | 2.98676900  | -1.71560200 | 0.21979600  |
| H  | 0.89286400  | -2.08883600 | 0.22878800  |
| C  | 3.65348700  | 0.53712500  | -0.30948900 |
| H  | 2.11398700  | 1.92663300  | -0.72112100 |
| C  | 4.00920800  | -0.77434900 | 0.02853800  |
| H  | 3.24128000  | -2.73638200 | 0.48226300  |
| H  | 4.43235300  | 1.27626600  | -0.46132200 |
| C  | 5.36628500  | -1.14197500 | 0.17315700  |
| N  | 6.47571900  | -1.44544200 | 0.29223300  |
| N  | -0.04287200 | 0.20234700  | -0.38699900 |
| C  | -0.58141600 | 1.41247500  | -0.62803400 |
| F  | -1.89149000 | 1.25040400  | -1.06761800 |
| Cs | -2.49748500 | -1.70310600 | 0.04427400  |
| F  | 0.00247200  | 2.18984800  | -1.62215500 |
| C  | -0.73532800 | 2.36941500  | 0.58879000  |
| F  | -1.34468100 | 3.51249400  | 0.26249700  |
| F  | 0.44729000  | 2.67833700  | 1.11835300  |
| F  | -1.46730100 | 1.78240000  | 1.54165800  |

### IM-3

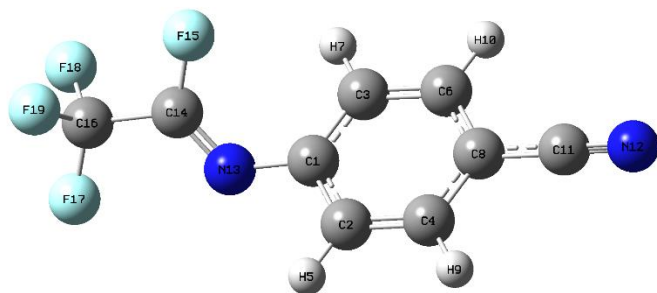

|   |             |             |             |
|---|-------------|-------------|-------------|
| C | -0.56129900 | 0.32508300  | -0.22093100 |
| C | -1.36076600 | 1.41292400  | 0.12259900  |
| C | -1.13735100 | -0.91574500 | -0.48990500 |
| C | -2.72641400 | 1.25572200  | 0.23811100  |
| H | -0.89784900 | 2.37534600  | 0.30298500  |
| C | -2.50576200 | -1.07014400 | -0.39812400 |
| H | -0.51634600 | -1.75183000 | -0.78623000 |
| C | -3.30313300 | 0.01205500  | -0.02380900 |
| H | -3.35219200 | 2.09396600  | 0.51797300  |
| H | -2.96166000 | -2.02934100 | -0.61002500 |
| C | -4.71361200 | -0.15129700 | 0.08205200  |
| N | -5.85488100 | -0.28397100 | 0.16891600  |
| N | 0.81337900  | 0.55155700  | -0.35330400 |
| C | 1.69024800  | -0.17231100 | 0.13838100  |
| F | 1.49787300  | -1.24445800 | 0.90156500  |
| C | 3.17626500  | 0.08218000  | -0.04892500 |
| F | 3.39342500  | 1.14983900  | -0.79583200 |
| F | 3.75167000  | -0.97105000 | -0.63273400 |
| F | 3.76475600  | 0.26211000  | 1.13470300  |

IM-4

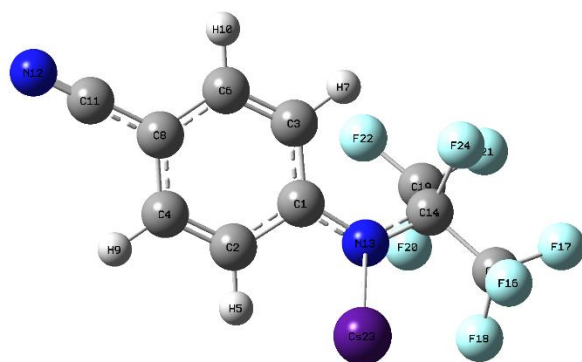

|    |             |             |             |
|----|-------------|-------------|-------------|
| C  | 0.91184900  | 0.67422100  | 0.18819900  |
| C  | 1.84827800  | 0.16578500  | 1.12670500  |
| C  | 1.44601800  | 1.47205600  | -0.85882600 |
| C  | 3.19535700  | 0.41414200  | 1.03089700  |
| H  | 1.46537000  | -0.41534000 | 1.95928900  |
| C  | 2.79418500  | 1.72135900  | -0.95338900 |
| H  | 0.78583800  | 1.88931700  | -1.60597900 |
| C  | 3.69651900  | 1.19580800  | -0.01836200 |
| H  | 3.87612600  | 0.01489600  | 1.77445100  |
| H  | 3.16939100  | 2.33197100  | -1.76729000 |
| C  | 5.08323200  | 1.44987500  | -0.13026800 |
| N  | 6.21764800  | 1.65250700  | -0.22223900 |
| N  | -0.37283200 | 0.28287700  | 0.33829300  |
| C  | -1.43773300 | 0.90283800  | -0.23147700 |
| C  | -2.66636500 | -0.03722200 | -0.10190400 |
| F  | -2.43266600 | -1.17072600 | -0.77968600 |
| F  | -3.77974600 | 0.49348000  | -0.60696900 |
| F  | -2.91762000 | -0.37481900 | 1.16103300  |
| C  | -1.75669100 | 2.31743100  | 0.34511300  |
| F  | -2.10540200 | 2.22763400  | 1.63185400  |
| F  | -2.75053000 | 2.93956300  | -0.29539600 |
| F  | -0.68757500 | 3.10890900  | 0.27351400  |
| Cs | 0.28480700  | -2.80553400 | -0.02133100 |
| F  | -1.38898600 | 1.14018700  | -1.64876800 |

IM-5

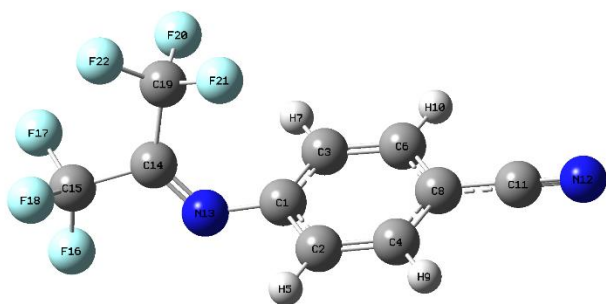

|   |             |             |             |
|---|-------------|-------------|-------------|
| C | 0.87673300  | -0.67947000 | -0.11237700 |
| C | 1.66522800  | -1.27621700 | 0.86977900  |
| C | 1.45096200  | 0.13341600  | -1.08758500 |
| C | 3.01864100  | -1.01799400 | 0.90829600  |
| H | 1.20477100  | -1.92715200 | 1.60262800  |
| C | 2.81071400  | 0.36960400  | -1.06405700 |
| H | 0.83517400  | 0.56236300  | -1.86827600 |
| C | 3.59754800  | -0.19578300 | -0.06096500 |
| H | 3.63603300  | -1.46083800 | 1.67986500  |
| H | 3.26612800  | 0.99781400  | -1.81952500 |
| C | 4.99818100  | 0.05650400  | -0.03178700 |
| N | 6.13191000  | 0.26115500  | -0.00758800 |
| N | -0.47842000 | -1.00674200 | -0.15737900 |
| C | -1.44075800 | -0.22090200 | -0.02291500 |
| C | -2.84953000 | -0.79405100 | -0.17726100 |
| F | -2.82203100 | -1.99874000 | -0.72170200 |
| F | -3.59150400 | -0.00013200 | -0.95497800 |
| F | -3.45712000 | -0.88968500 | 1.00777000  |
| C | -1.36209600 | 1.27911900  | 0.29409800  |
| F | -1.27422700 | 1.99199100  | -0.83067100 |
| F | -0.30658200 | 1.56021200  | 1.04778200  |
| F | -2.44967800 | 1.68319500  | 0.94832500  |

### HCF<sub>3</sub>

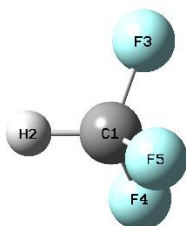

|   |             |             |             |
|---|-------------|-------------|-------------|
| C | 0.00002800  | -0.00003200 | 0.34593200  |
| H | 0.00010500  | -0.00002700 | 1.43666400  |
| F | -0.31268700 | 1.20736600  | -0.13005800 |
| F | -0.88930800 | -0.87444900 | -0.13005100 |
| F | 1.20196500  | -0.33289300 | -0.13014200 |

### Product

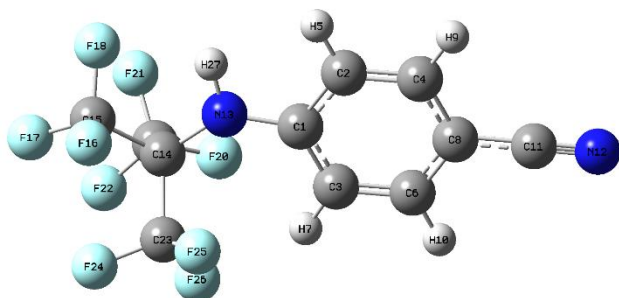

|   |             |             |             |
|---|-------------|-------------|-------------|
| C | 1.32267100  | 0.54248100  | -0.00647100 |
| C | 2.21435600  | 1.62646000  | 0.01482800  |
| C | 1.84589500  | -0.75157900 | -0.03004400 |
| C | 3.57349300  | 1.42941400  | 0.01956100  |
| H | 1.82053900  | 2.63682900  | 0.03158700  |
| C | 3.21246300  | -0.94969500 | -0.02035100 |
| H | 1.21036300  | -1.62022300 | -0.07003500 |
| C | 4.09111100  | 0.13093300  | 0.00545900  |
| H | 4.24348500  | 2.28027500  | 0.03690600  |
| H | 3.60172700  | -1.96026500 | -0.03940300 |
| C | 5.49503100  | -0.08240600 | 0.01320900  |
| N | 6.63562600  | -0.25357500 | 0.01976600  |
| N | -0.01970800 | 0.87854900  | 0.00806000  |
| C | -1.21451100 | 0.10463500  | -0.00976800 |
| C | -2.36165500 | 1.10629400  | 0.36688600  |
| F | -2.31957400 | 1.38198200  | 1.66628400  |
| F | -3.55930300 | 0.62552400  | 0.07176800  |



|   |             |             |             |
|---|-------------|-------------|-------------|
| F | -2.21786000 | 2.25856300  | -0.28734100 |
| C | -1.50719300 | -0.48672500 | -1.42837600 |
| F | -0.43160300 | -1.10004100 | -1.90856800 |
| F | -1.82238700 | 0.49107300  | -2.27422100 |
| F | -2.50978600 | -1.36119100 | -1.41214200 |
| C | -1.24135900 | -1.05184300 | 1.05908800  |
| F | -2.48174200 | -1.30511600 | 1.46765100  |
| F | -0.51628300 | -0.71790500 | 2.11443800  |
| F | -0.76297300 | -2.19379300 | 0.56634600  |
| H | -0.17575000 | 1.86887900  | -0.09590300 |

### TMSCF<sub>3</sub>

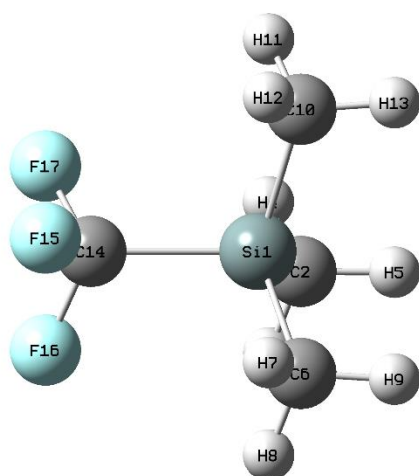

|    |             |             |             |
|----|-------------|-------------|-------------|
| Si | 0.86331300  | 0.00011400  | 0.00024500  |
| C  | 1.36512200  | -0.23367900 | -1.77478700 |
| H  | 0.99102300  | -1.18148200 | -2.17125200 |
| H  | 0.98621000  | 0.57591400  | -2.40444700 |
| H  | 2.45624600  | -0.24168800 | -1.85828500 |
| C  | 1.36453300  | -1.42095500 | 1.08952700  |
| H  | 0.98697000  | -1.29330400 | 2.10763700  |
| H  | 0.98835200  | -2.37077900 | 0.69991800  |
| H  | 2.45559700  | -1.48768300 | 1.14161600  |
| C  | 1.36542400  | 1.65411500  | 0.68525300  |
| H  | 0.98894000  | 2.47134600  | 0.06405600  |
| H  | 0.98884200  | 1.79337400  | 1.70219300  |
| H  | 2.45658300  | 1.73152400  | 0.71744200  |
| C  | -1.08081200 | 0.00013700  | -0.00003300 |
| F  | -1.61007000 | 0.15546100  | 1.23690800  |
| F  | -1.60999200 | -1.14875900 | -0.48405900 |
| F  | -1.61002100 | 0.99368300  | -0.75307800 |

## TMSF

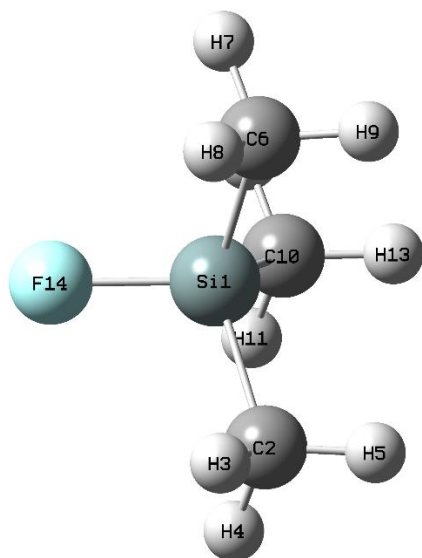

|    |             |             |             |
|----|-------------|-------------|-------------|
| Si | -0.00007400 | -0.00001000 | 0.01756200  |
| C  | 0.79409300  | -1.58996800 | -0.51768700 |
| H  | 1.82220900  | -1.66275700 | -0.15124000 |
| H  | 0.23733800  | -2.45562500 | -0.14722100 |
| H  | 0.82241400  | -1.65205600 | -1.61019100 |
| C  | 0.98000200  | 1.48243200  | -0.51806900 |
| H  | 0.53033800  | 2.40921600  | -0.15002300 |
| H  | 2.00862300  | 1.43195200  | -0.14929600 |
| H  | 1.01798900  | 1.53908000  | -1.61059700 |
| C  | -1.77399300 | 0.10723100  | -0.51796400 |
| H  | -2.35229200 | -0.74439100 | -0.14790000 |
| H  | -2.24388200 | 1.02442100  | -0.15111000 |
| H  | -1.84214300 | 0.10940800  | -1.61047600 |
| F  | -0.00001900 | 0.00030200  | 1.64494500  |

## HF

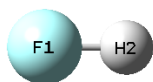

|   |            |            |             |
|---|------------|------------|-------------|
| F | 0.00000000 | 0.00000000 | 0.09260600  |
| H | 0.00000000 | 0.00000000 | -0.83345500 |

**KF**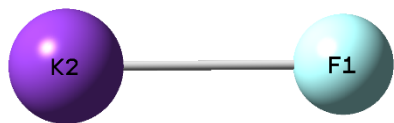

|   |            |            |             |
|---|------------|------------|-------------|
| F | 0.00000000 | 0.00000000 | -1.56206400 |
| K | 0.00000000 | 0.00000000 | 0.73992500  |

**KHF<sub>2</sub>**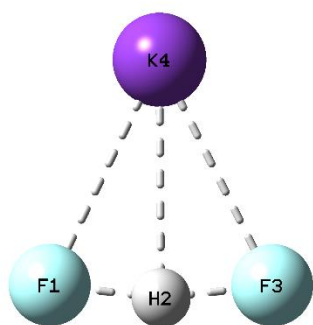

|   |             |             |            |
|---|-------------|-------------|------------|
| F | -1.12771000 | -1.14710100 | 0.00000000 |
| H | -0.00002000 | -1.27771300 | 0.00000000 |
| F | 1.12771300  | -1.14745100 | 0.00000000 |
| K | 0.00000000  | 1.15414100  | 0.00000000 |

**Cs<sub>2</sub>HF<sub>3</sub>**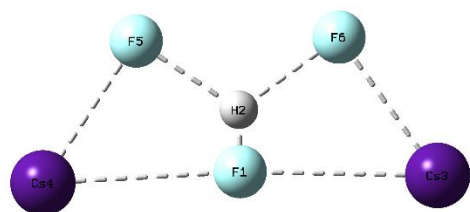

|    |            |             |             |
|----|------------|-------------|-------------|
| F  | 0.00000000 | 0.00000000  | -0.18340200 |
| H  | 0.00000000 | 0.00000000  | 0.78198800  |
| Cs | 0.00000000 | 3.07984800  | -0.30050400 |
| Cs | 0.00000000 | -3.07984800 | -0.30050400 |
| F  | 0.00000000 | -1.58185300 | 1.88467000  |
| F  | 0.00000000 | 1.58185300  | 1.88467000  |

#### 4. General procedure for the synthesis of *N*-CF<sub>3</sub> secondary amines<sup>6</sup>

A 25 mL Schlenk flask equipped with a magnetic stir bar was charged with the isothiocyanate (1.0 mmol, 1.0 equiv.) and silver fluoride (5.0 mmol, 5.0 equiv.). The flask was evacuated and refilled with N<sub>2</sub> three times. Triethylsilane (indicated equivalents) was dissolved in acetonitrile (5.0 mL) and the solution was added quickly to the vessel via syringe (if the isothiocyanate was a liquid or an oil, it was added as a solution in the solvent). The reaction mixture was stirred at room temperature for 8 h. The crude mixture was filtered and concentrated under reduced pressure to about 1 mL, subsequently was added to Et<sub>2</sub>O (30 mL) and stirred for 10 minutes. The solid was filtered through celite and the solvents were then evaporated. The crude material was dissolved in Et<sub>2</sub>O and filtered through a pad of celite again to obtain the corresponding *N*-CF<sub>3</sub> secondary amines.

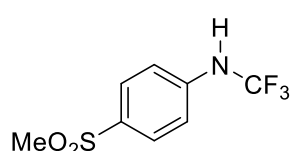

**4-(methylsulfonyl)-*N*-(trifluoromethyl)aniline.** The title compound was obtained as a white solid in 92% yield (220 mg) using triethylsilane (1.4 mmol, 1.4 equiv.) following the general procedure for *N*-CF<sub>3</sub> secondary amines. M.p.: 127-129 °C. <sup>1</sup>H NMR (500 MHz, CD<sub>3</sub>CN) δ 7.81 (d, *J* = 8.9 Hz, 2H), 7.34 (s, 1H), 7.11 (d, *J* = 8.6 Hz, 2H), 3.01 (s, 3H). <sup>19</sup>F NMR (470 MHz, CD<sub>3</sub>CN) δ -56.9 (d, *J* = 13.5 Hz, 3F). <sup>13</sup>C NMR (126 MHz, CD<sub>3</sub>CN) δ 143.7, 134.6, 129.7, 121.9 (q, *J* = 255.2 Hz), 116.7, 44.4. HRMS (EI): *m/z* calcd for C<sub>8</sub>H<sub>8</sub>F<sub>3</sub>NO<sub>2</sub>S: 239.0222 M<sup>+</sup>; Found 239.0222.

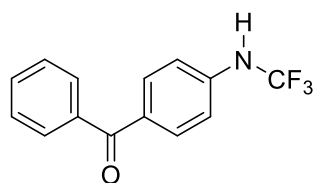

**phenyl(4-((trifluoromethyl)amino)phenyl)methanone.** The title compound was obtained as a white solid in 95% yield (251 mg) using triethylsilane (1.4 mmol, 1.4 equiv.) following the general procedure for *N*-CF<sub>3</sub> secondary amines. M.p.: 104-106 °C. <sup>1</sup>H NMR (500 MHz, DMSO-*d*<sub>6</sub>) δ 9.41 (d, *J* = 5.4 Hz, 1H), 7.62 (d, *J* = 8.5 Hz, 2H), 7.57 (d, *J* = 7.8 Hz, 2H), 7.46 (t, *J* = 7.6 Hz, 1H), 7.37 (t, *J* = 7.7 Hz, 2H), 6.98 (d, *J* = 8.5 Hz, 2H). <sup>19</sup>F NMR (470 MHz, DMSO-*d*<sub>6</sub>) δ -54.5 (d, *J* = 5.3 Hz, 3F). <sup>13</sup>C NMR (126 MHz, DMSO-*d*<sub>6</sub>) δ 194.8, 143.4, 138.1, 132.4, 132.2, 130.5, 129.7, 128.7, 122.0 (q, *J* = 255.0 Hz), 115.7. HRMS (EI): *m/z* calcd for C<sub>14</sub>H<sub>10</sub>F<sub>3</sub>NO: 265.0709 M<sup>+</sup>; Found 265.0705.

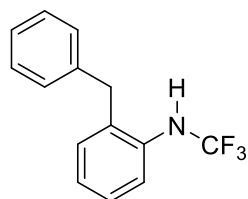

**2-benzyl-*N*-(trifluoromethyl)aniline.** The title compound was obtained as a colorless oil in 84% yield (211 mg) using triethylsilane (1.3 mmol, 1.3 equiv.) following the general procedure for *N*-CF<sub>3</sub> secondary amines. <sup>1</sup>H NMR (500 MHz, CDCl<sub>3</sub>) δ 7.40 (t, *J* = 7.4 Hz, 2H), 7.36 - 7.31 (m, 2H), 7.29 - 7.26 (m, 2H), 7.23 (d, *J* = 7.1 Hz, 2H), 7.17 (td, *J* = 8.1, 1.3 Hz, 1H), 4.94 (s, 1H), 4.06 (s, 2H). <sup>19</sup>F NMR (470 MHz, CDCl<sub>3</sub>) δ -55.1 (d, *J* = 3.9 Hz, 3F). <sup>13</sup>C NMR (126 MHz, CDCl<sub>3</sub>) δ 138.6, 136.0, 131.3, 130.2, 129.1, 128.5, 127.9, 127.0,

124.0, 121.8 (q,  $J = 256.2$  Hz), 119.6 (q,  $J = 2.5$  Hz), 38.2. **HRMS** (EI):  $m/z$  calcd for  $C_{14}H_{12}F_3N$ : 251.0916  $M^+$ ; Found 251.0916.

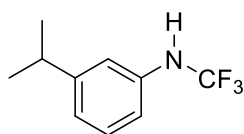

**3-isopropyl-*N*-(trifluoromethyl)aniline.** The title compound was obtained as a colorless oil in 89% yield (181 mg) using triethylsilane (1.5 mmol, 1.5 equiv.) following the general procedure for *N*-CF<sub>3</sub> secondary amines. **<sup>1</sup>H NMR** (500 MHz, CDCl<sub>3</sub>)  $\delta$  7.10 (t,  $J = 7.8$  Hz, 1H), 6.83 (d,  $J = 7.8$  Hz, 1H), 6.69 (d,  $J = 10.6$  Hz, 2H), 4.97 (s, 1H), 2.80 - 2.71 (m, 1H), 1.13 (d,  $J = 7.1$  Hz, 6H). **<sup>19</sup>F NMR** (470 MHz, CDCl<sub>3</sub>)  $\delta$  -55.6 (d,  $J = 4.6$  Hz, 3F). **<sup>13</sup>C NMR** (126 MHz, CDCl<sub>3</sub>)  $\delta$  149.5, 136.5, 128.3, 120.7 (q,  $J = 256.1$  Hz), 120.4, 115.2, 114.3, 33.1, 22.8. **HRMS** (EI):  $m/z$  calcd for  $C_{10}H_{12}F_3N$ : 203.0916  $M^+$ ; Found 203.0915.

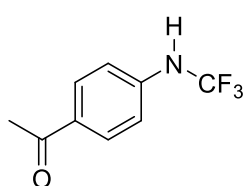

**1-(4-((trifluoromethyl)amino)phenyl)ethan-1-one.** The title compound was obtained as a white solid in 99% yield (201 mg) using triethylsilane (1.5 mmol, 1.5 equiv.) following the general procedure for *N*-CF<sub>3</sub> secondary amines. M.p.: 103-105 °C. **<sup>1</sup>H NMR** (500 MHz, DMSO-*d*<sub>6</sub>)  $\delta$  9.36 (q,  $J = 5.3$  Hz, 1H), 7.83 (d,  $J = 8.6$  Hz, 2H), 6.96 (d,  $J = 8.5$  Hz, 2H), 2.42 (s, 3H). **<sup>19</sup>F NMR** (470 MHz, DMSO-*d*<sub>6</sub>)  $\delta$  -54.9 (d,  $J = 5.5$  Hz, 3F). **<sup>13</sup>C NMR** (126 MHz, DMSO-*d*<sub>6</sub>)  $\delta$  196.5, 143.5, 130.9, 130.5, 121.9 (q,  $J = 255.0$  Hz), 115.7, 26.5. **HRMS** (EI):  $m/z$  calcd for  $C_9H_8F_3NO$ : 203.0552  $M^+$ ; Found 203.0551.

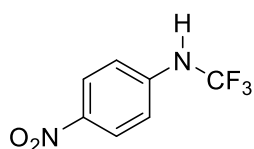

**4-nitro-*N*-(trifluoromethyl)aniline.** The title compound was obtained as a yellow solid in 93% yield (192 mg) using triethylsilane (1.9 mmol, 1.9 equiv.) following the general procedure for *N*-CF<sub>3</sub> secondary amines. M.p.: 102-104 °C. **<sup>1</sup>H NMR** (500 MHz, DMSO-*d*<sub>6</sub>)  $\delta$  9.93 (s, 1H), 8.22 (d,  $J = 9.3$  Hz, 2H), 7.13 (d,  $J = 9.2$  Hz, 2H). **<sup>19</sup>F NMR** (470 MHz, DMSO-*d*<sub>6</sub>)  $\delta$  -55.2 (s, 3F). **<sup>13</sup>C NMR** (126 MHz, DMSO-*d*<sub>6</sub>)  $\delta$  145.3, 141.7, 125.9, 121.5 (q,  $J = 255.6$  Hz), 115.8. **HRMS** (EI):  $m/z$  calcd for  $C_7H_5F_3N_2O_2$ : 206.0298  $M^+$ ; Found 206.0298.

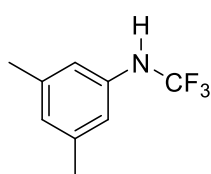

**3,5-dimethyl-*N*-(trifluoromethyl)aniline.** The title compound was obtained as a colorless oil in 80% yield (151 mg) using triethylsilane (1.4 mmol, 1.4 equiv.) following the general procedure for *N*-CF<sub>3</sub> secondary amines. **<sup>1</sup>H NMR** (500 MHz, CDCl<sub>3</sub>)  $\delta$  6.59 (s, 1H), 6.46 (s, 2H), 4.87 (s, 1H), 2.16 (s, 6H). **<sup>19</sup>F NMR** (470 MHz, CDCl<sub>3</sub>)  $\delta$  -55.5 (d,  $J = 5.1$  Hz, 3F). **<sup>13</sup>C NMR** (126 MHz, CDCl<sub>3</sub>)  $\delta$  138.2, 136.4, 123.9, 120.7 (q,  $J = 256.1$  Hz), 114.6, 20.2. **HRMS** (EI):  $m/z$  calcd for  $C_9H_{10}F_3N$ : 189.0760  $M^+$ ; Found 189.0760.

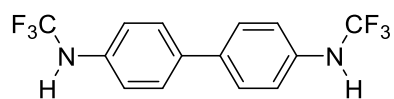

***N*<sup>4</sup>,*N*<sup>4'</sup>-bis(trifluoromethyl)-[1,1'-biphenyl]-4,4'-diamine.** The title compound was obtained as a yellow solid in 90% yield (288 mg) using triethylsilane (3.2 mmol, 3.2 equiv.), silver fluoride (10.0 mmol, 10.0 equiv.), MeCN (10.0 mL) following

the general procedure for *N*-CF<sub>3</sub> secondary amines. M.p.: 104-106 °C. <sup>1</sup>H NMR (500 MHz, CD<sub>3</sub>CN) δ 7.38 (d, *J* = 8.7 Hz, 4H), 7.06 (q, *J* = 6.0 Hz, 2H), 6.98 (d, *J* = 8.5 Hz, 4H). <sup>19</sup>F NMR (470 MHz, CD<sub>3</sub>CN) δ -56.0 (d, *J* = 5.7 Hz, 6F). <sup>13</sup>C NMR (126 MHz, CD<sub>3</sub>CN) δ 138.3, 135.1, 128.0, 122.8 (q, *J* = 254.0 Hz), 118.4. HRMS (EI): *m/z* calcd for C<sub>14</sub>H<sub>10</sub>F<sub>6</sub>N<sub>2</sub>: 320.0743 M<sup>+</sup>; Found 320.0743.

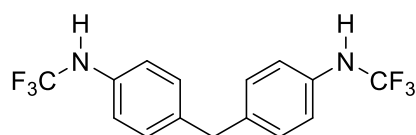

**4,4'-methylenebis(*N*-(trifluoromethyl)aniline).**

The title compound was obtained as a white solid in 81% yield (271 mg) using triethylsilane (2.8 mmol, 2.8 equiv.), silver fluoride (10.0 mmol, 10.0 equiv.), MeCN (10.0 mL) following the general procedure for *N*-CF<sub>3</sub> secondary amines. M.p.: 36-37 °C. <sup>1</sup>H NMR (500 MHz, CD<sub>3</sub>CN) δ 6.99 (d, *J* = 8.7 Hz, 4H), 6.83 (d, *J* = 8.3 Hz, 4H), 6.43 (q, *J* = 6.3 Hz, 2H), 3.69 (s, 2H). <sup>19</sup>F NMR (470 MHz, CD<sub>3</sub>CN) δ -56.1 (d, *J* = 6.3 Hz, 6F). <sup>13</sup>C NMR (126 MHz, CD<sub>3</sub>CN) δ 137.0, 137.0, 130.3, 122.9 (q, *J* = 254.0 Hz), 118.7, 40.4. HRMS (EI): *m/z* calcd for C<sub>15</sub>H<sub>12</sub>F<sub>6</sub>N<sub>2</sub>: 334.0899 M<sup>+</sup>; Found 334.0899.

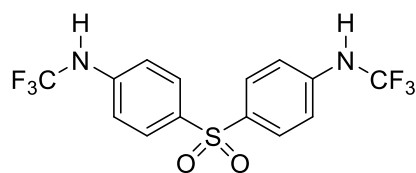

**4,4'-sulfonylbis(*N*-(trifluoromethyl)aniline).**

The title compound was obtained as a white solid in 80% yield (307 mg) using triethylsilane (2.8 mmol, 2.8 equiv.), silver fluoride (10.0 mmol, 10.0 equiv.), MeCN (10.0 mL) following the general procedure for *N*-CF<sub>3</sub> secondary amines. M.p.: 167-169 °C. <sup>1</sup>H NMR (500 MHz, CD<sub>3</sub>CN) δ 7.72 (d, *J* = 8.9 Hz, 4H), 7.22 (q, *J* = 5.2 Hz, 2H), 6.97 (d, *J* = 8.7 Hz, 4H). <sup>19</sup>F NMR (470 MHz, CD<sub>3</sub>CN) δ -57.0 (d, *J* = 5.9 Hz, 6F). <sup>13</sup>C NMR (126 MHz, CD<sub>3</sub>CN) δ 143.5, 135.5, 129.7, 121.8 (q, *J* = 255.3 Hz), 116.8. HRMS (FI): *m/z* calcd for C<sub>14</sub>H<sub>10</sub>F<sub>6</sub>N<sub>2</sub>O<sub>2</sub>S: 384.0362 M<sup>+</sup>; Found 384.0364.

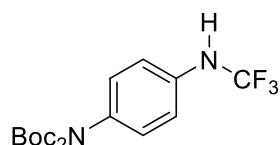

***tert*-butyl (*tert*-butoxycarbonyl)(4-((trifluoromethyl)amino)phenyl)carbamate.**

The title compound was obtained as a white solid in 97% yield (364 mg) using triethylsilane (1.3 mmol, 1.3 equiv.) following the general procedure for *N*-CF<sub>3</sub> secondary amines. M.p.: 137-139 °C. <sup>1</sup>H NMR (500 MHz, DMSO-*d*<sub>6</sub>) δ 8.89 (q, *J* = 5.8 Hz, 1H), 7.10 (d, *J* = 8.6 Hz, 2H), 6.96 (d, *J* = 8.4 Hz, 2H), 1.39 (s, 18H). <sup>19</sup>F NMR (470 MHz, DMSO-*d*<sub>6</sub>) δ -54.2 (d, *J* = 5.9 Hz, 3F). <sup>13</sup>C NMR (126 MHz, DMSO-*d*<sub>6</sub>) δ 152.1, 138.0, 133.6, 129.2, 122.4 (q, *J* = 253.9 Hz), 117.2, 82.4, 27.9. HRMS (EI): *m/z* calcd for C<sub>17</sub>H<sub>23</sub>F<sub>3</sub>N<sub>2</sub>O<sub>4</sub>: 376.1604 M<sup>+</sup>; Found 376.1609.

## 5. General procedure for *N*-perfluoro-*tert*-butyl secondary amines

Under nitrogen atmosphere, a 25 mL Schlenk flask equipped with a magnetic stir bar was charged with the *N*-CF<sub>3</sub> secondary amines (0.8 mmol, 1.0 equiv.), CsF (1.2 mmol, 1.5 equiv.) and dry THF (2.0 mL). The mixture was stirred at room temperature and then TMSCF<sub>3</sub> (4.8 mmol, 6.0 equiv.) dissolved in dry THF (2.0 mL) was added dropwise to the reaction mixture. After the addition was completed, the reaction mixture was stirred at room temperature for 6 h. The crude mixture was filtered and concentrated under reduced pressure. The residue was purified by column chromatography on silica gel using the indicated solvent system to give the corresponding products.

### Particular examples

Compounds **27** and **28** were obtained in a one-pot method from isothiocyanates to *N*-PFtB secondary amines. According to general procedure for the synthesis of *N*-CF<sub>3</sub> secondary amines, a mixture of isothiocyanate (0.8 mmol, 1.0 equiv.), silver fluoride (4.0 mmol, 5.0 equiv.), triethylsilane (1.36 mmol, 1.7 equiv.) and replacement of MeCN with THF (4.0 mL) was stirred at room temperature for 12 h. After the reaction was completed, CsF (1.2 mmol, 1.5 equiv.) and TMSCF<sub>3</sub> (4.8 mmol, 6.0 equiv.) were added and stirred at room temperature for another 6 h.

For compounds **29** and **30**, a mixture of isothiocyanate (0.8 mmol, 1.0 equiv.), silver fluoride (4.0 mmol, 5.0 equiv.), triethylsilane (1.2 mmol, 1.5 equiv.) and MeCN (4.0 mL) was stirred at room temperature for 8 h following the general procedure for *N*-CF<sub>3</sub> secondary amines. But THF was used instead of Et<sub>2</sub>O to purify the crude mixture, which was then concentrated to about 2 mL and CsF (1.2 mmol, 1.5 equiv.) and TMSCF<sub>3</sub> (4.8 mmol, 6.0 equiv.) were added following the general procedure for *N*-perfluoro-*tert*-butyl secondary amines.

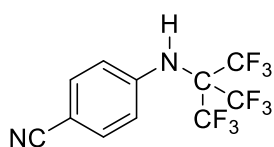

**4-((1,1,1,3,3,3-hexafluoro-2-(trifluoromethyl)propan-2-yl)amino)benzonitrile (1)**. White solid, M.p.: 89-91 °C, yield 76% (204 mg). Eluent: ethyl acetate/petroleum ether (4:96). <sup>1</sup>H NMR (500 MHz, CDCl<sub>3</sub>) δ 7.55 (d, *J* = 8.8 Hz, 2H), 7.14 (d, *J* = 8.6 Hz, 2H), 4.71 (s, 1H). <sup>19</sup>F NMR (470 MHz, CDCl<sub>3</sub>) δ -68.8 (s, 9F). <sup>13</sup>C NMR (126 MHz, CDCl<sub>3</sub>) δ 144.6, 133.3, 121.9, 120.9 (q, *J* = 292.3 Hz), 118.5, 107.2, 69.9 (m). HRMS (EI): *m/z* calcd for C<sub>11</sub>H<sub>5</sub>F<sub>9</sub>N<sub>2</sub>: 336.0304 M<sup>+</sup>; Found 336.0307.

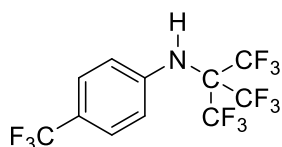

***N*-(1,1,1,3,3,3-hexafluoro-2-(trifluoromethyl)propan-2-yl)-4-(trifluoromethyl)aniline<sup>7</sup> (2).** Colorless oil (volatile compound). Eluent: petroleum ether. <sup>1</sup>H NMR (500 MHz, CDCl<sub>3</sub>) δ 7.56 (d, *J* = 8.5 Hz, 2H), 7.18 (d, *J* = 8.3 Hz, 2H), 4.23 (s, 1H). <sup>19</sup>F NMR (470 MHz, CDCl<sub>3</sub>) δ -62.7 (s, 3F), -68.8 (s, 9F). <sup>13</sup>C NMR (126 MHz, CDCl<sub>3</sub>) δ 143.0, 127.1 (q, *J* = 33.3 Hz), 126.4 (q, *J* = 3.8 Hz), 124.0 (q, *J* = 272.2 Hz), 123.1, 121.0 (q, *J* = 291.7 Hz), 69.9 (m). HRMS (EI): *m/z* calcd for C<sub>11</sub>H<sub>5</sub>F<sub>12</sub>N: 379.0225 M<sup>+</sup>; Found 379.0225.

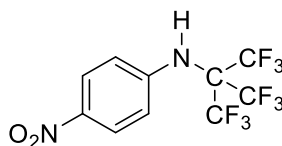

***N*-(1,1,1,3,3,3-hexafluoro-2-(trifluoromethyl)propan-2-yl)-4-nitroaniline<sup>7</sup> (3).** White solid, M.p.: 69-70 °C, yield 85% (242 mg). Eluent: ethyl acetate/petroleum ether (3:97). <sup>1</sup>H NMR (500 MHz, CDCl<sub>3</sub>) δ 8.15 - 8.12 (m, 2H), 7.17 (d, *J* = 9.3 Hz, 2H), 4.91 (s, 1H). <sup>19</sup>F NMR (470 MHz, CDCl<sub>3</sub>) δ -68.8 (s, 9F). <sup>13</sup>C NMR (126 MHz, CDCl<sub>3</sub>) δ 146.5, 143.4, 125.1, 120.9 (q, *J* = 293.3 Hz), 120.5, 69.9 (m). HRMS (EI): *m/z* calcd for C<sub>10</sub>H<sub>5</sub>F<sub>9</sub>N<sub>2</sub>O<sub>2</sub>: 356.0202 M<sup>+</sup>; Found 356.0205.

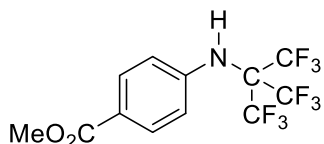

**methyl 4-((1,1,1,3,3,3-hexafluoro-2-(trifluoromethyl)propan-2-yl)amino)benzoate (4).** White solid, M.p.: 67-68 °C, yield 80% (236 mg). Eluent: ethyl acetate/petroleum ether (3:97). <sup>1</sup>H NMR (500 MHz, CDCl<sub>3</sub>) δ 7.94 (d, *J* = 8.5 Hz, 2H), 7.10 (d, *J* = 8.5 Hz, 2H), 4.51 (s, 1H), 3.86 (s, 3H). <sup>19</sup>F NMR (470 MHz, CDCl<sub>3</sub>) δ -68.9 (s, 9F). <sup>13</sup>C NMR (126 MHz, CDCl<sub>3</sub>) δ 166.5, 144.3, 130.8, 126.2, 122.0, 121.0 (q, *J* = 293.3 Hz), 70.0 (m), 51.9. HRMS (EI): *m/z* calcd for C<sub>12</sub>H<sub>8</sub>F<sub>9</sub>NO<sub>2</sub>: 369.0406 M<sup>+</sup>; Found 369.0413.

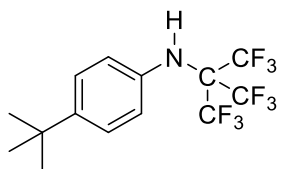

**4-(*tert*-butyl)-*N*-(1,1,1,3,3,3-hexafluoro-2-(trifluoromethyl)propan-2-yl)aniline (5).** Light yellow oil, yield 31% (91 mg). Eluent: petroleum ether. <sup>1</sup>H NMR (500 MHz, CDCl<sub>3</sub>) δ 7.30 (d, *J* = 8.6 Hz, 2H), 7.07 (d, *J* = 8.3 Hz, 2H), 3.89 (s, 1H), 1.31 (s, 9H). <sup>19</sup>F NMR (470 MHz, CDCl<sub>3</sub>) δ -68.7 (s, 9F). <sup>13</sup>C NMR (126 MHz, CDCl<sub>3</sub>) δ 148.9, 136.5, 125.9, 125.3, 121.1 (q, *J* = 293.0 Hz), 70.0 (m), 34.4, 31.3. HRMS (EI): *m/z* calcd for C<sub>14</sub>H<sub>14</sub>F<sub>9</sub>N: 367.0977 M<sup>+</sup>; Found 367.0980.

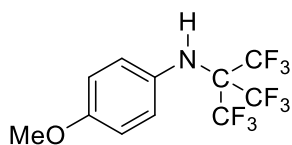

***N*-(1,1,1,3,3,3-hexafluoro-2-(trifluoromethyl)propan-2-yl)-4-methoxyaniline<sup>7</sup> (6).** Brown oil, yield 35% (95 mg). Eluent: petroleum ether. <sup>1</sup>H NMR (500 MHz, CDCl<sub>3</sub>) δ 7.13 (d, *J* = 8.6 Hz, 2H), 6.81 (d, *J* = 8.9 Hz, 2H), 3.79 (s, 3H), 3.77 (s, 1H). <sup>19</sup>F NMR (470 MHz, CDCl<sub>3</sub>) δ -68.7 (s, 9F). <sup>13</sup>C NMR (126 MHz, CDCl<sub>3</sub>) δ 158.1, 131.5, 128.8, 121.1 (q, *J* = 291.8 Hz), 114.0, 70.0 (m), 55.4. HRMS (EI): *m/z* calcd for C<sub>11</sub>H<sub>8</sub>F<sub>9</sub>NO: 341.0457 M<sup>+</sup>; Found 341.0453.



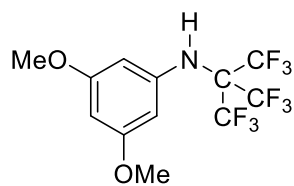

***N*-(1,1,1,3,3,3-hexafluoro-2-(trifluoromethyl)propan-2-yl)-3,5-dimethoxyaniline (7)**. Light yellow oil, yield 28% (83 mg). Eluent: ethyl acetate/petroleum ether (3:97).  $^1\text{H NMR}$  (500 MHz,  $\text{CDCl}_3$ )  $\delta$  6.28 (t,  $J = 4.3$  Hz, 1H), 6.27 (d,  $J = 2.2$  Hz, 2H), 3.98 (s, 1H), 3.76 (s, 6H).  $^{19}\text{F NMR}$  (470 MHz,  $\text{CDCl}_3$ )  $\delta$  -68.4 (s, 9F).  $^{13}\text{C NMR}$  (126 MHz,  $\text{CDCl}_3$ )  $\delta$  161.0, 141.3, 121.0 (q,  $J = 291.9$  Hz), 102.9, 97.3, 70.0 (m), 55.3. **HRMS** (EI):  $m/z$  calcd for  $\text{C}_{12}\text{H}_{10}\text{F}_9\text{NO}_2$ : 371.0562  $\text{M}^+$ ; Found 371.0561.

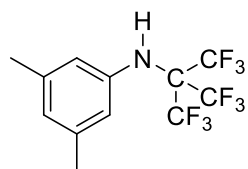

***N*-(1,1,1,3,3,3-hexafluoro-2-(trifluoromethyl)propan-2-yl)-3,5-dimethylaniline (8)**. Light yellow oil, yield 38% (103 mg). Eluent: petroleum ether.  $^1\text{H NMR}$  (500 MHz,  $\text{CDCl}_3$ )  $\delta$  6.86 (s, 1H), 6.79 (s, 2H), 3.91 (s, 1H), 2.32 (s, 6H).  $^{19}\text{F NMR}$  (470 MHz,  $\text{CDCl}_3$ )  $\delta$  -68.5 (s, 9F).  $^{13}\text{C NMR}$  (126 MHz,  $\text{CDCl}_3$ )  $\delta$  139.3, 138.7, 127.4, 122.9, 121.1 (q,  $J = 293.0$  Hz), 70.1 (m), 21.1. **HRMS** (EI):  $m/z$  calcd for  $\text{C}_{12}\text{H}_{10}\text{F}_9\text{N}$ : 339.0664  $\text{M}^+$ ; Found 339.0667.

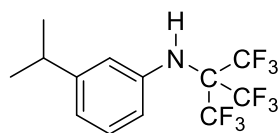

***N*-(1,1,1,3,3,3-hexafluoro-2-(trifluoromethyl)propan-2-yl)-3-isopropylaniline (9)**. Light yellow oil, yield 39% (110 mg). Eluent: petroleum ether.  $^1\text{H NMR}$  (500 MHz,  $\text{CDCl}_3$ )  $\delta$  7.24 (t,  $J = 7.8$  Hz, 1H), 7.09 (d,  $J = 7.8$  Hz, 1H), 7.04 (s, 1H), 6.99 (d,  $J = 7.9$  Hz, 1H), 3.98 (s, 1H), 2.95 - 2.87 (m, 1H), 1.27 (d,  $J = 7.1$  Hz, 6H).  $^{19}\text{F NMR}$  (470 MHz,  $\text{CDCl}_3$ )  $\delta$  -68.5 (s, 9F).  $^{13}\text{C NMR}$  (126 MHz,  $\text{CDCl}_3$ )  $\delta$  150.1, 139.3, 128.9, 123.9, 123.6, 122.7, 121.1 (q,  $J = 293.0$  Hz), 70.1 (m), 34.0, 23.7. **HRMS** (EI):  $m/z$  calcd for  $\text{C}_{13}\text{H}_{12}\text{F}_9\text{N}$ : 353.0821  $\text{M}^+$ ; Found 353.0825.

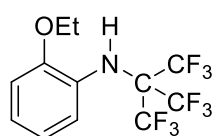

**2-ethoxy-*N*-(1,1,1,3,3,3-hexafluoro-2-(trifluoromethyl)propan-2-yl)aniline (10)**. Colorless oil, yield 61% (173 mg). Eluent: petroleum ether.  $^1\text{H NMR}$  (500 MHz,  $\text{CDCl}_3$ )  $\delta$  7.16 (d,  $J = 8.0$  Hz, 1H), 7.05 (t,  $J = 7.8$  Hz, 1H), 6.87 (t,  $J = 8.7$  Hz, 2H), 5.00 (s, 1H), 4.08 (q,  $J = 7.0$  Hz, 2H), 1.44 (t,  $J = 7.0$  Hz, 3H).  $^{19}\text{F NMR}$  (470 MHz,  $\text{CDCl}_3$ )  $\delta$  -73.9 (s, 9F).  $^{13}\text{C NMR}$  (126 MHz,  $\text{CDCl}_3$ )  $\delta$  150.8, 129.9, 124.6, 121.9, 121.3 (q,  $J = 293.1$  Hz), 120.7, 111.3, 70.2 (m), 64.2, 14.5. **HRMS** (EI):  $m/z$  calcd for  $\text{C}_{12}\text{H}_{10}\text{F}_9\text{NO}$ : 355.0613  $\text{M}^+$ ; Found 355.0614.

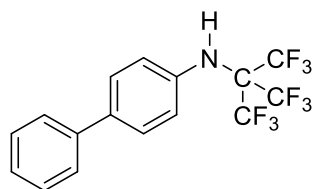

***N*-(1,1,1,3,3,3-hexafluoro-2-(trifluoromethyl)propan-2-yl)-[1,1'-biphenyl]-4-amine (11)**. White solid, M.p.: 91-93  $^{\circ}\text{C}$ , yield 39% (121 mg). Eluent: ethyl acetate/petroleum ether (1:99).  $^1\text{H NMR}$  (500 MHz,  $\text{CDCl}_3$ )  $\delta$  7.60 (d,  $J = 7.5$  Hz, 2H), 7.55 (d,  $J = 8.3$  Hz, 2H), 7.46 (t,  $J = 7.6$  Hz, 2H), 7.37 (t,  $J = 7.4$  Hz, 1H), 7.23 (d,  $J = 8.2$  Hz, 2H), 4.04 (s, 1H).  $^{19}\text{F NMR}$  (470 MHz,  $\text{CDCl}_3$ )  $\delta$  -68.6 (s, 9F).  $^{13}\text{C NMR}$  (126 MHz,  $\text{CDCl}_3$ )  $\delta$  140.1, 138.7, 138.6, 128.9, 127.7, 127.4, 127.0, 125.7, 121.2 (q,  $J = 292.0$  Hz), 70.1 (m). **HRMS** (EI):  $m/z$  calcd for  $\text{C}_{16}\text{H}_{10}\text{F}_9\text{N}$ : 387.0664  $\text{M}^+$ ; Found 387.0671.

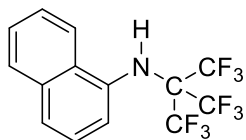

***N*-(1,1,1,3,3,3-hexafluoro-2-(trifluoromethyl)propan-2-yl)naphthalen-1-amine (12)**. White solid, M.p.: 120-122 °C, yield 38% (110 mg). Eluent: petroleum ether.  $^1\text{H NMR}$  (500 MHz,  $\text{CDCl}_3$ )  $\delta$  8.09 (d,  $J = 8.4$  Hz, 1H), 7.88 (d,  $J = 8.1$  Hz, 1H), 7.74 (d,  $J = 8.1$  Hz, 1H), 7.58 (t,  $J = 7.4$  Hz, 1H), 7.53 (t,  $J = 7.5$  Hz, 1H), 7.48 (d,  $J = 7.5$  Hz, 1H), 7.42 (t,  $J = 7.9$  Hz, 1H), 4.20 (s, 1H).  $^{19}\text{F NMR}$  (470 MHz,  $\text{CDCl}_3$ )  $\delta$  -68.9 (s, 9F).  $^{13}\text{C NMR}$  (126 MHz,  $\text{CDCl}_3$ )  $\delta$  134.7, 134.5, 131.0, 128.7, 126.9, 126.7, 126.2, 125.4, 123.3, 121.5, 121.3 (q,  $J = 293.3$  Hz), 70.6 (m). **HRMS** (EI):  $m/z$  calcd for  $\text{C}_{14}\text{H}_8\text{F}_9\text{N}$ : 361.0508  $\text{M}^+$ ; Found 361.0510.

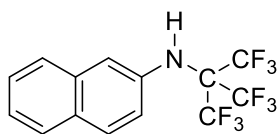

***N*-(1,1,1,3,3,3-hexafluoro-2-(trifluoromethyl)propan-2-yl)naphthalen-2-amine (13)**. White solid, M.p.: 54-55 °C, yield 54% (156 mg). Eluent: petroleum ether.  $^1\text{H NMR}$  (500 MHz,  $\text{CDCl}_3$ )  $\delta$  7.87 (d,  $J = 8.5$  Hz, 1H), 7.82 (d,  $J = 9.1$  Hz, 2H), 7.65 (d,  $J = 2.4$  Hz, 1H), 7.56 - 7.50 (m, 2H), 7.32 (dd,  $J = 8.8, 2.4$  Hz, 1H), 4.22 (s, 1H).  $^{19}\text{F NMR}$  (470 MHz,  $\text{CDCl}_3$ )  $\delta$  -68.4 (s, 9F).  $^{13}\text{C NMR}$  (126 MHz,  $\text{CDCl}_3$ )  $\delta$  136.9, 133.7, 131.4, 129.0, 127.6, 126.7, 125.8, 124.6, 122.6, 121.3 (q,  $J = 291.7$  Hz), 70.2 (m). **HRMS** (EI):  $m/z$  calcd for  $\text{C}_{14}\text{H}_8\text{F}_9\text{N}$ : 361.0508  $\text{M}^+$ ; Found 361.0513.

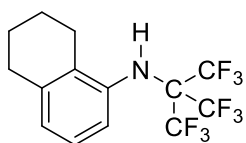

***N*-(1,1,1,3,3,3-hexafluoro-2-(trifluoromethyl)propan-2-yl)-5,6,7,8-tetrahydronaphthalen-1-amine (14)**. Colorless oil, yield 30% (88 mg). Eluent: petroleum ether.  $^1\text{H NMR}$  (500 MHz,  $\text{CDCl}_3$ )  $\delta$  7.06 - 7.01 (m, 2H), 6.87 (d,  $J = 7.1$  Hz, 1H), 3.81 (s, 1H), 2.77 (t,  $J = 6.3$  Hz, 2H), 2.60 (t,  $J = 6.5$  Hz, 2H), 1.88 - 1.83 (m, 2H), 1.78 - 1.73 (m, 2H).  $^{19}\text{F NMR}$  (470 MHz,  $\text{CDCl}_3$ )  $\delta$  -68.8 (s, 9F).  $^{13}\text{C NMR}$  (126 MHz,  $\text{CDCl}_3$ )  $\delta$  138.5, 138.0, 130.1, 125.8, 125.7, 121.2 (q,  $J = 293.4$  Hz), 119.8 (m), 70.2 (m), 29.9, 24.3, 23.1, 22.4. **HRMS** (EI):  $m/z$  calcd for  $\text{C}_{14}\text{H}_{12}\text{F}_9\text{N}$ : 365.0821  $\text{M}^+$ ; Found 365.0822.

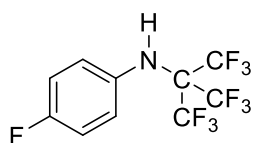

**4-fluoro-*N*-(1,1,1,3,3,3-hexafluoro-2-(trifluoromethyl)propan-2-yl)aniline<sup>7</sup> (15)**. Colorless oil (volatile compound). Eluent: petroleum ether.  $^1\text{H NMR}$  (500 MHz,  $\text{CDCl}_3$ )  $\delta$  7.17 - 7.15 (m, 2H), 7.01 - 6.97 (m, 2H), 3.86 (s, 1H).  $^{19}\text{F NMR}$  (470 MHz,  $\text{CDCl}_3$ )  $\delta$  -68.4 (s, 9F), -115.8 (s, 1F).  $^{13}\text{C NMR}$  (126 MHz,  $\text{CDCl}_3$ )  $\delta$  161.0 (d,  $J = 246.5$  Hz), 134.8 (d,  $J = 3.3$  Hz), 128.7 (d,  $J = 8.7$  Hz), 121.0 (q,  $J = 291.6$  Hz), 115.8 (d,  $J = 22.6$  Hz), 69.9 (m). **HRMS** (EI):  $m/z$  calcd for  $\text{C}_{10}\text{H}_5\text{F}_{10}\text{N}$ : 329.0257  $\text{M}^+$ ; Found 329.0257.

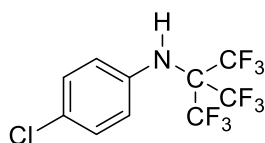

**4-chloro-*N*-(1,1,1,3,3,3-hexafluoro-2-(trifluoromethyl)propan-2-yl)aniline (16)**. Light yellow oil, yield 62% (171 mg). Eluent: petroleum ether.  $^1\text{H NMR}$  (500 MHz,  $\text{CDCl}_3$ )  $\delta$  7.16 (d,  $J = 8.8$  Hz, 2H), 6.98 (d,  $J = 8.7$  Hz, 2H), 3.83 (s, 1H).  $^{19}\text{F NMR}$  (470 MHz,  $\text{CDCl}_3$ )  $\delta$  -68.5 (s, 9F).  $^{13}\text{C NMR}$  (126 MHz,  $\text{CDCl}_3$ )  $\delta$  137.8, 131.7, 129.2, 127.1, 121.0 (q,  $J = 293.0$  Hz), 69.9 (m). **HRMS** (EI):  $m/z$  calcd for  $\text{C}_{10}\text{H}_5\text{ClF}_9\text{N}$ : 344.9961  $\text{M}^+$ ; Found 344.9965.

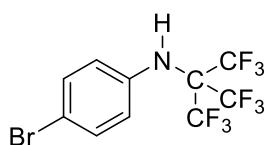

**4-bromo-*N*-(1,1,1,3,3,3-hexafluoro-2-(trifluoromethyl)propan-2-yl)aniline** (**17**). Light yellow oil, yield 57% (178 mg). Eluent: petroleum ether.  $^1\text{H NMR}$  (500 MHz,  $\text{CDCl}_3$ )  $\delta$  7.42 (d,  $J = 8.8$  Hz, 2H), 7.02 (d,  $J = 8.7$  Hz, 2H), 3.94 (s, 1H).  $^{19}\text{F NMR}$  (470 MHz,  $\text{CDCl}_3$ )  $\delta$  -68.7 (s, 9F).  $^{13}\text{C NMR}$  (126 MHz,  $\text{CDCl}_3$ )  $\delta$  138.4, 132.2, 127.2, 121.0 (q,  $J = 291.8$  Hz), 119.4, 69.9 (m). **HRMS** (EI):  $m/z$  calcd for  $\text{C}_{10}\text{H}_5\text{BrF}_9\text{N}$ : 388.9456  $\text{M}^+$ ; Found 388.9461.

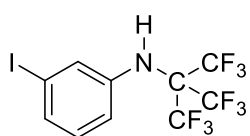

***N*-(1,1,1,3,3,3-hexafluoro-2-(trifluoromethyl)propan-2-yl)-3-iodoaniline** (**18**). Colorless oil, yield 65% (227 mg). Eluent: petroleum ether.  $^1\text{H NMR}$  (500 MHz,  $\text{CDCl}_3$ )  $\delta$  7.53 (d,  $J = 7.6$  Hz, 1H), 7.50 (s, 1H), 7.12 (d,  $J = 8.0$  Hz, 1H), 7.03 (t,  $J = 8.0$  Hz, 1H), 3.97 (s, 1H).  $^{19}\text{F NMR}$  (470 MHz,  $\text{CDCl}_3$ )  $\delta$  -68.8 (s, 9F).  $^{13}\text{C NMR}$  (126 MHz,  $\text{CDCl}_3$ )  $\delta$  140.7, 134.8, 134.1, 130.5, 124.2, 121.0 (q,  $J = 291.9$  Hz), 93.8, 69.9 (m). **HRMS** (EI):  $m/z$  calcd for  $\text{C}_{10}\text{H}_5\text{F}_9\text{IN}$ : 436.9317  $\text{M}^+$ ; Found 436.9323.

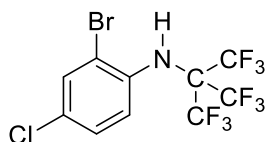

**2-bromo-4-chloro-*N*-(1,1,1,3,3,3-hexafluoro-2-(trifluoromethyl)propan-2-yl)aniline** (**19**). Colorless oil, yield 75% (255 mg). Eluent: petroleum ether.  $^1\text{H NMR}$  (500 MHz,  $\text{CDCl}_3$ )  $\delta$  7.57 (d,  $J = 2.4$  Hz, 1H), 7.23 (dd,  $J = 9.0, 2.5$  Hz, 1H), 7.18 (d,  $J = 8.9$  Hz, 1H), 4.83 (s, 1H).  $^{19}\text{F NMR}$  (470 MHz,  $\text{CDCl}_3$ )  $\delta$  -68.9 (s, 9F).  $^{13}\text{C NMR}$  (126 MHz,  $\text{CDCl}_3$ )  $\delta$  137.0, 132.5, 129.9, 128.5, 122.5 (m), 121.0 (q,  $J = 293.3$  Hz), 118.0, 70.1 (m). **HRMS** (EI):  $m/z$  calcd for  $\text{C}_{10}\text{H}_4\text{BrClF}_9\text{N}$ : 422.9066  $\text{M}^+$ ; Found 422.9067.

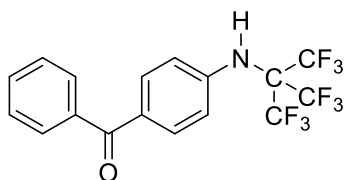

**(4-((1,1,1,3,3,3-hexafluoro-2-(trifluoromethyl)propan-2-yl)amino)phenyl)(phenyl)methanone** (**20**). White solid, M.p.: 81-82 °C, yield 55% (183 mg). Eluent: ethyl acetate/petroleum ether (2:98).  $^1\text{H NMR}$  (500 MHz,  $\text{CDCl}_3$ )  $\delta$  7.77 (t,  $J = 6.7$  Hz, 4H), 7.58 (t,  $J = 7.4$  Hz, 1H), 7.48 (t,  $J = 7.6$  Hz, 2H), 7.14 (d,  $J = 8.4$  Hz, 2H), 4.46 (s, 1H).  $^{19}\text{F NMR}$  (470 MHz,  $\text{CDCl}_3$ )  $\delta$  -69.4 (s, 9F).  $^{13}\text{C NMR}$  (126 MHz,  $\text{CDCl}_3$ )  $\delta$  195.4, 144.0, 137.7, 133.5, 132.3, 131.6, 129.8, 128.3, 121.6, 121.0 (q,  $J = 293.4$  Hz), 70.0 (m). **HRMS** (EI):  $m/z$  calcd for  $\text{C}_{17}\text{H}_{10}\text{F}_9\text{NO}$ : 415.0613  $\text{M}^+$ ; Found 415.0618.

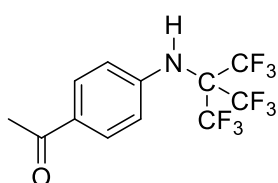

**1-(4-((1,1,1,3,3,3-hexafluoro-2-(trifluoromethyl)propan-2-yl)amino)phenyl)ethan-1-one** (**21**). Light yellow solid, M.p.: 66-67 °C, yield 49% (138 mg). Eluent: ethyl acetate/petroleum ether (10:90).  $^1\text{H NMR}$  (500 MHz,  $\text{CDCl}_3$ )  $\delta$  7.87 (d,  $J = 8.8$  Hz, 2H), 7.12 (d,  $J = 8.7$  Hz, 2H), 4.65 (s, 1H), 2.53 (s, 3H).  $^{19}\text{F NMR}$  (470 MHz,  $\text{CDCl}_3$ )  $\delta$  -68.6 (s, 9F).  $^{13}\text{C NMR}$  (126 MHz,  $\text{CDCl}_3$ )  $\delta$  196.9, 144.6, 133.0, 129.7, 121.5, 121.0 (q,  $J = 292.1$  Hz), 70.0 (m), 26.2. **HRMS** (EI):  $m/z$  calcd for  $\text{C}_{12}\text{H}_8\text{F}_9\text{NO}$ : 353.0457  $\text{M}^+$ ; Found 353.0460.

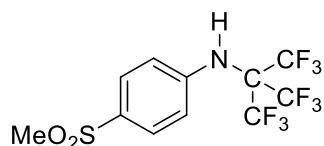

***N*-(1,1,1,3,3,3-hexafluoro-2-(trifluoromethyl)propan-2-yl)-4-(methylsulfonyl)aniline (22)**. White solid, M.p.: 111-113 °C, yield 49% (152 mg). Eluent: ethyl acetate/petroleum ether (25:75).  $^1\text{H NMR}$  (500 MHz,  $\text{CDCl}_3$ )  $\delta$  7.81 (d,  $J = 8.7$  Hz, 2H), 7.18 (d,  $J = 8.8$  Hz, 2H), 4.67 (s, 1H), 3.03 (s, 3H).  $^{19}\text{F NMR}$  (470 MHz,  $\text{CDCl}_3$ )  $\delta$  -68.4 (s, 9F).  $^{13}\text{C NMR}$  (126 MHz,  $\text{CDCl}_3$ )  $\delta$  145.3, 135.5, 128.9, 121.6, 120.9 (q,  $J = 293.6$  Hz), 69.8 (m), 44.5. **HRMS** (EI):  $m/z$  calcd for  $\text{C}_{11}\text{H}_8\text{F}_9\text{NO}_2\text{S}$ : 389.0127  $\text{M}^+$ ; Found 389.0134.

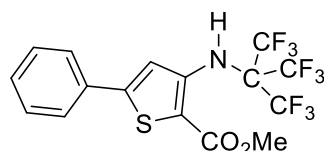

**methyl 3-((1,1,1,3,3,3-hexafluoro-2-(trifluoromethyl)propan-2-yl)amino)-5-phenylthiophene-2-carboxylate (23)**. Light yellow solid, M.p.: 95-97 °C, yield 70% (253 mg). Eluent: ethyl acetate/petroleum ether (3:97).  $^1\text{H NMR}$  (500 MHz,  $\text{CDCl}_3$ )  $\delta$  8.63 (s, 1H), 7.59 (d,  $J = 6.4$  Hz, 2H), 7.44 - 7.39 (m, 3H), 7.10 (s, 1H), 3.91 (s, 3H).  $^{19}\text{F NMR}$  (470 MHz,  $\text{CDCl}_3$ )  $\delta$  -68.9 (s, 9F).  $^{13}\text{C NMR}$  (126 MHz,  $\text{CDCl}_3$ )  $\delta$  165.4, 149.8, 148.8, 133.0, 129.5, 129.2, 126.1, 121.1 (q,  $J = 293.6$  Hz), 115.4, 107.8, 69.5 (m), 52.0. **HRMS** (EI):  $m/z$  calcd for  $\text{C}_{16}\text{H}_{10}\text{F}_9\text{NO}_2\text{S}$ : 451.0283  $\text{M}^+$ ; Found 451.0286.

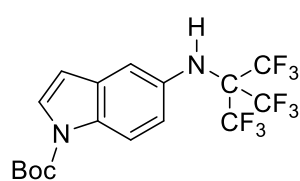

***tert*-butyl 5-((1,1,1,3,3,3-hexafluoro-2-(trifluoromethyl)propan-2-yl)amino)-1*H*-indole-1-carboxylate (24)**. Light yellow solid, M.p.: 96-97 °C, yield 40% (144 mg). Eluent: ethyl acetate/petroleum ether (1:99).  $^1\text{H NMR}$  (500 MHz,  $\text{CDCl}_3$ )  $\delta$  8.06 (d,  $J = 8.9$  Hz, 1H), 7.61 (d,  $J = 3.7$  Hz, 1H), 7.40 (s, 1H), 7.15 (d,  $J = 9.7$  Hz, 1H), 6.53 (d,  $J = 3.7$  Hz, 1H), 4.00 (s, 1H), 1.67 (s, 9H).  $^{19}\text{F NMR}$  (470 MHz,  $\text{CDCl}_3$ )  $\delta$  -69.3 (s, 9F).  $^{13}\text{C NMR}$  (126 MHz,  $\text{CDCl}_3$ )  $\delta$  149.6, 133.8, 133.5, 131.0, 126.9, 123.7, 121.2 (q,  $J = 292.6$  Hz), 119.3, 115.3, 107.1, 83.9, 70.2 (m), 28.1. **HRMS** (EI):  $m/z$  calcd for  $\text{C}_{17}\text{H}_{15}\text{F}_9\text{N}_2\text{O}_2$ : 450.0984  $\text{M}^+$ ; Found 450.0987.

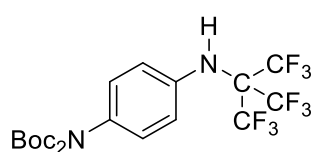

***tert*-butyl (tert-butoxycarbonyl)(4-((1,1,1,3,3,3-hexafluoro-2-(trifluoromethyl)propan-2-yl)amino)phenyl)carbamate (25)**. Light yellow oil, yield 54% (277 mg). Eluent: ethyl acetate/petroleum ether (3:97).  $^1\text{H NMR}$  (500 MHz,  $\text{CDCl}_3$ )  $\delta$  7.09 (d,  $J = 8.5$  Hz, 2H), 7.01 (d,  $J = 8.5$  Hz, 2H), 4.07 (s, 1H), 1.35 (s, 18H).  $^{19}\text{F NMR}$  (470 MHz,  $\text{CDCl}_3$ )  $\delta$  -68.5 (s, 9F).  $^{13}\text{C NMR}$  (126 MHz,  $\text{CDCl}_3$ )  $\delta$  151.5, 138.4, 137.2, 128.4, 125.8, 121.0 (q,  $J = 291.7$  Hz), 82.7, 70.0 (m), 27.7. **HRMS** (EI):  $m/z$  calcd for  $\text{C}_{20}\text{H}_{23}\text{F}_9\text{N}_2\text{O}_4$ : 526.1509  $\text{M}^+$ ; Found 526.1523.

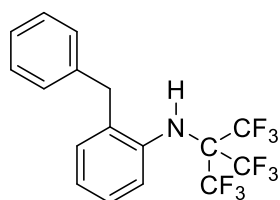

**2-benzyl-*N*-(1,1,1,3,3,3-hexafluoro-2-(trifluoromethyl)propan-2-yl)aniline (26)**. Colorless oil, yield 74% (237 mg). Eluent: petroleum ether.  $^1\text{H NMR}$  (500 MHz,  $\text{CDCl}_3$ )  $\delta$  7.46 - 7.43 (m, 3H), 7.41 - 7.36 (m, 3H), 7.31 - 7.27 (m, 3H), 4.21 (s, 2H), 3.96 (s, 1H).  $^{19}\text{F NMR}$  (470 MHz,  $\text{CDCl}_3$ )  $\delta$  -68.8 (s, 9F).  $^{13}\text{C NMR}$  (126 MHz,  $\text{CDCl}_3$ )  $\delta$  138.6, 138.5, 134.6, 131.6,

129.0, 128.3, 127.8, 126.9, 125.1, 124.2 (m), 121.3 (q,  $J = 292.0$  Hz), 70.3 (m), 38.5. **HRMS** (EI):  $m/z$  calcd for  $C_{17}H_{12}F_9N$ : 401.0821  $M^+$ ; Found 401.0825.

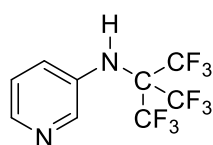

***N*-(1,1,1,3,3,3-hexafluoro-2-(trifluoromethyl)propan-2-yl)pyridin-3-amine (27)**. Violet solid, M.p.: 55-56 °C, yield 31% (77 mg, 2 steps). Eluent: ethyl acetate/petroleum ether (20:80).  **$^1H$  NMR** (500 MHz,  $CDCl_3$ )  $\delta$  8.41 (d,  $J = 2.9$  Hz, 1H), 8.37 (d,  $J = 3.3$  Hz, 1H), 7.51 (d,  $J = 8.1$  Hz, 1H), 7.22 (q,  $J = 4.4$  Hz, 1H), 4.67 (s, 1H).  **$^{19}F$  NMR** (470 MHz,  $CDCl_3$ )  $\delta$  -68.6 (s, 9F).  **$^{13}C$  NMR** (126 MHz,  $CDCl_3$ )  $\delta$  147.3, 146.7, 136.3, 133.0, 123.5, 120.9 (q,  $J = 293.0$  Hz), 69.8 (m). **HRMS** (EI):  $m/z$  calcd for  $C_9H_5F_9N_2$ : 312.0304  $M^+$ ; Found 312.0303.

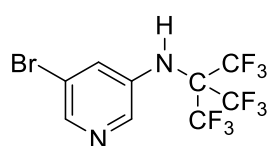

**5-bromo-*N*-(1,1,1,3,3,3-hexafluoro-2-(trifluoromethyl)propan-2-yl)pyridin-3-amine (28)**. White solid, M.p.: 84-85 °C, yield 35% (109 mg, 2 steps). Eluent: ethyl acetate/petroleum ether (10:90).  **$^1H$  NMR** (500 MHz,  $CDCl_3$ )  $\delta$  8.46 (s, 1H), 8.34 (s, 1H), 7.66 (s, 1H), 4.48 (s, 1H).  **$^{19}F$  NMR** (470 MHz,  $CDCl_3$ )  $\delta$  -68.6 (s, 9F).  **$^{13}C$  NMR** (126 MHz,  $CDCl_3$ )  $\delta$  147.7, 144.7, 137.0, 135.0, 120.8 (q,  $J = 293.0$  Hz), 120.2, 69.7 (m). **HRMS** (EI):  $m/z$  calcd for  $C_9H_4BrF_9N_2$ : 389.9409  $M^+$ ; Found 389.9417.

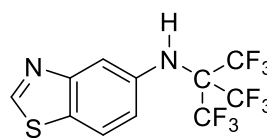

***N*-(1,1,1,3,3,3-hexafluoro-2-(trifluoromethyl)propan-2-yl)benzo[d]thiazol-5-amine (29)**. Light yellow solid, M.p.: 119-121 °C, yield 28% (82 mg, 2 steps). Eluent: ethyl acetate/petroleum ether (10:90).  **$^1H$  NMR** (500 MHz,  $CDCl_3$ )  $\delta$  9.00 (s, 1H), 7.95 (d,  $J = 2.3$  Hz, 1H), 7.85 (d,  $J = 8.6$  Hz, 1H), 7.27 (dd,  $J = 8.5, 2.3$  Hz, 1H), 4.31 (s, 1H).  **$^{19}F$  NMR** (470 MHz,  $CDCl_3$ )  $\delta$  -68.3 (s, 9F).  **$^{13}C$  NMR** (126 MHz,  $CDCl_3$ )  $\delta$  155.4, 153.9, 137.9, 131.3, 124.4, 121.9, 121.1 (q,  $J = 293.0$  Hz), 120.6, 70.1 (m). **HRMS** (EI):  $m/z$  calcd for  $C_{11}H_5F_9N_2S$ : 368.0024  $M^+$ ; Found 368.0030.

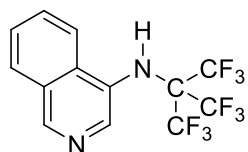

***N*-(1,1,1,3,3,3-hexafluoro-2-(trifluoromethyl)propan-2-yl)isoquinolin-4-amine (30)**. Light yellow solid, M.p.: 130-132 °C, yield 25% (72 mg, 2 steps). Eluent: ethyl acetate/petroleum ether (20:80).  **$^1H$  NMR** (500 MHz, MeOD)  $\delta$  9.15 (s, 1H), 8.44 (s, 1H), 8.29 (d,  $J = 8.6$  Hz, 1H), 8.13 (d,  $J = 8.3$  Hz, 1H), 7.89 - 7.85 (m, 1H), 7.74 - 7.71 (m, 1H).  **$^{19}F$  NMR** (470 MHz, MeOD)  $\delta$  -69.9 (s, 9F).  **$^{13}C$  NMR** (126 MHz, MeOD)  $\delta$  150.7, 141.0 (q,  $J = 2.2$  Hz), 135.9, 131.6, 131.1, 129.3, 127.8, 127.7, 122.2, 121.4 (q,  $J = 291.3$  Hz), 70.4 (m). **HRMS** (EI):  $m/z$  calcd for  $C_{13}H_7F_9N_2$ : 362.0460  $M^+$ ; Found 362.0468.

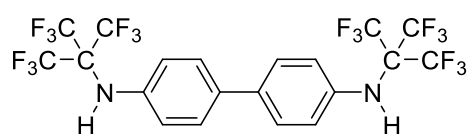

***N*<sup>4</sup>,*N*<sup>4'</sup>-bis(1,1,1,3,3,3-hexafluoro-2-(trifluoromethyl)propan-2-yl)-[1,1'-biphenyl]-4,4'-diamine (31)**. White solid, M.p.: 95-97 °C, yield 20% (99 mg). Eluent: ethyl acetate/petroleum ether (2:98).  **$^1H$  NMR** (500 MHz,  $CDCl_3$ )  $\delta$  7.50 (d,  $J = 8.6$  Hz, 4H),

7.20 (d,  $J = 8.3$  Hz, 4H), 4.02 (s, 2H).  $^{19}\text{F}$  NMR (470 MHz,  $\text{CDCl}_3$ )  $\delta$  -69.2 (s, 18F).  $^{13}\text{C}$  NMR (126 MHz,  $\text{CDCl}_3$ )  $\delta$  138.7, 137.5, 127.5, 125.7, 121.1 (q,  $J = 293.1$  Hz), 70.1 (m). HRMS (EI):  $m/z$  calcd for  $\text{C}_{20}\text{H}_{10}\text{F}_{18}\text{N}_2$ : 620.0551  $\text{M}^+$ ; Found 620.0558.

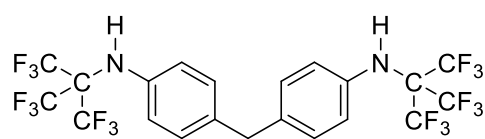

**4,4'-methylenebis(*N*-(1,1,1,3,3,3-hexafluoro-2-(trifluoromethyl)propan-2-yl)aniline) (32).**

Colorless oil, yield 15% (76 mg). Eluent: ethyl acetate/petroleum ether (2:98).  $^1\text{H}$  NMR (500 MHz,  $\text{CDCl}_3$ )  $\delta$  7.07 (s, 8H), 3.93 (s, 2H), 3.90 (s, 2H).  $^{19}\text{F}$  NMR (470 MHz,  $\text{CDCl}_3$ )  $\delta$  -68.7 (s, 18F).  $^{13}\text{C}$  NMR (126 MHz,  $\text{CDCl}_3$ )  $\delta$  138.5, 137.4, 129.5, 125.9, 121.1 (q,  $J = 291.6$  Hz), 70.1 (m), 40.5. HRMS (EI):  $m/z$  calcd for  $\text{C}_{21}\text{H}_{12}\text{F}_{18}\text{N}_2$ : 634.0708  $\text{M}^+$ ; Found 634.0713.

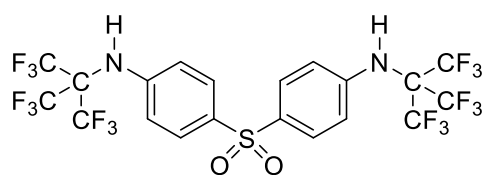

**4,4'-sulfonylbis(*N*-(1,1,1,3,3,3-hexafluoro-2-(trifluoromethyl)propan-2-yl)aniline) (33).**

White solid, M.p.: 151-153 °C, yield 27% (148 mg). Eluent: ethyl acetate/petroleum ether (10:90).  $^1\text{H}$  NMR (500 MHz,  $\text{CD}_3\text{CN}$ )  $\delta$  7.75 (d,  $J = 8.9$  Hz, 4H), 7.20 (d,  $J = 8.5$  Hz, 4H), 5.48 (s, 2H).  $^{19}\text{F}$  NMR (470 MHz,  $\text{CD}_3\text{CN}$ )  $\delta$  -69.0 (s, 18F).  $^{13}\text{C}$  NMR (126 MHz,  $\text{CD}_3\text{CN}$ )  $\delta$  145.9, 137.2, 129.3, 123.0, 121.7 (q,  $J = 291.9$  Hz), 70.6 (m). HRMS (EI):  $m/z$  calcd for  $\text{C}_{20}\text{H}_{10}\text{F}_{18}\text{N}_2\text{O}_2\text{S}$ : 684.0170  $\text{M}^+$ ; Found 684.0172.

## 6. Derivative reactions

### Transformation of 34:

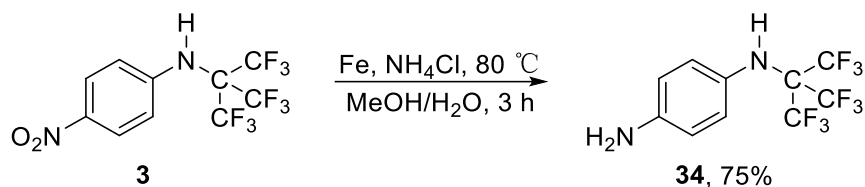

Ferrous powder (7.5 mmol, 5.0 equiv.) was added into the mixture of **3** (1.5 mmol, 1.0 equiv.) and ammonium chloride (15.0 mmol, 10.0 equiv.) in 10.0 mL MeOH/H<sub>2</sub>O (1: 1). The reaction mixture was stirred at 80 °C for 3 h, and then cooled to room temperature. The mixture was filtered, the filtrate was collected. After removal of MeOH under reduced pressure, the resulting aqueous fraction was adjusted to pH 4 with 2M HCl and then extracted with ethyl acetate. The organic layer was washed with saturated NaCl and dried over anhydrous Na<sub>2</sub>SO<sub>4</sub>. After concentrated under reduced pressure, the crude residue was purified by flash column chromatography on silica gel.

### Transformation of 35:

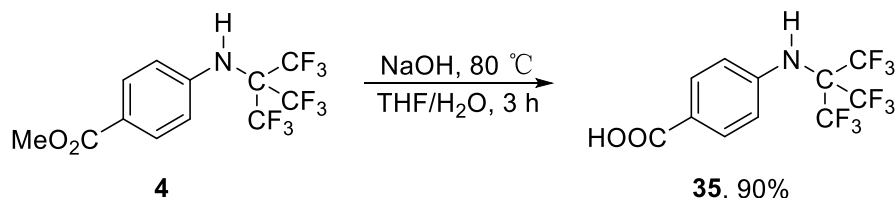

Compound **4** (1.5 mmol, 1.0 equiv.), NaOH (3.0 mmol, 2.0 equiv.) were dissolved in 10.0 mL THF/H<sub>2</sub>O (4: 1). The reaction mixture was stirred at 80 °C for 3 h, and then cooled to room temperature. The reaction mixture diluted with EtOAc (100 mL) and was washed with 0.5M HCl (100 mL). The organic layer was separated, dried over anhydrous Na<sub>2</sub>SO<sub>4</sub> and evaporated under reduced pressure. The crude residue was purified by column chromatography on silica gel.

**N<sup>1</sup>-(1,1,1,3,3,3-hexafluoro-2-(trifluoromethyl)propan-2-yl)benzene-1,4-diamine (34)**. White solid, M.p.: 41-42 °C, yield 75% (367 mg). Eluent: ethyl acetate/petroleum ether (10:90). <sup>1</sup>H NMR (500 MHz, CDCl<sub>3</sub>) δ 7.02 (d, *J* = 8.4 Hz, 2H), 6.57 (d, *J* = 8.8 Hz, 2H), 3.82 (s, 1H), 3.62 (s, 2H). <sup>19</sup>F NMR (470 MHz, CDCl<sub>3</sub>) δ -68.7 (s, 9F). <sup>13</sup>C NMR (126 MHz, CDCl<sub>3</sub>) δ 145.1, 129.5, 129.1, 121.2 (q, *J* = 293.1

Hz), 115.1, 70.0 (m). **HRMS** (EI):  $m/z$  calcd for  $C_{10}H_7F_9N_2$ : 326.0460  $M^+$ ; Found 326.0462.

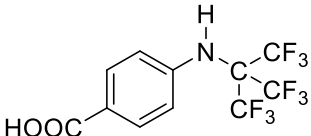**4-((1,1,1,3,3,3-hexafluoro-2-(trifluoromethyl)propan-2-yl)amino)benzoic acid (35)**. White solid, M.p.: 163-165 °C, yield 90% (479 mg). Eluent: ethyl acetate/petroleum ether (90:10).  **$^1H$  NMR** (500 MHz, DMSO- $d_6$ )  $\delta$  12.79 (s, 1H), 7.88 (d,  $J = 8.7$  Hz, 2H), 7.25 (d,  $J = 8.4$  Hz, 2H), 7.04 (s, 1H).  **$^{19}F$  NMR** (470 MHz, DMSO- $d_6$ )  $\delta$  -67.3 (s, 9F).  **$^{13}C$  NMR** (126 MHz, DMSO- $d_6$ )  $\delta$  167.3, 145.2, 130.7, 126.7, 123.5, 121.4 (q,  $J = 295.0$  Hz), 70.3 (m). **HRMS** (EI):  $m/z$  calcd for  $C_{11}H_6F_9NO_2$ : 355.0249  $M^+$ ; Found 355.0244.

### Synthesis of 36, 37:

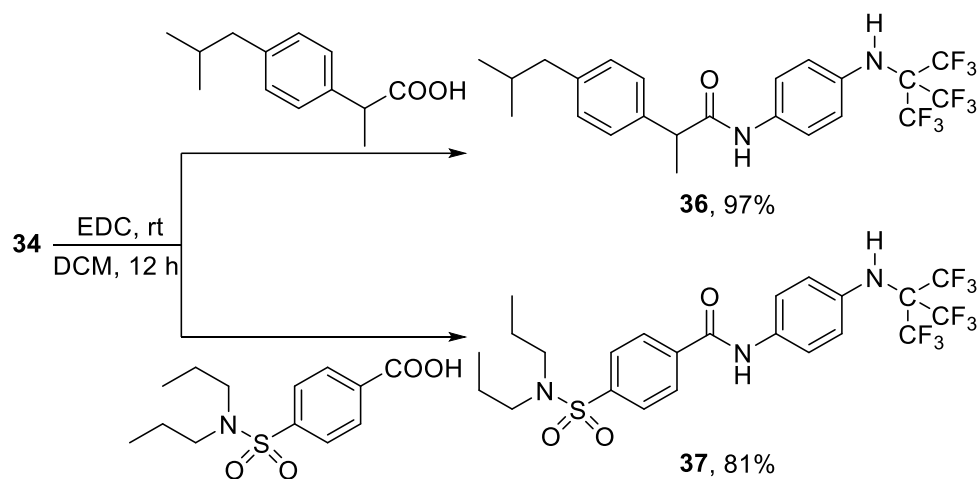

Compound **34** (0.5 mmol, 1.0 equiv.) was added into the mixture of acid (1.0 mmol, 2.0 equiv.), EDC (0.75 mmol, 1.5 equiv.) and DMAP (0.05 mmol, 0.1 equiv.) in 2.0 mL DCM. The reaction was stirred at room temperature for 12 h. Upon completion, the solution was evaporated under reduced pressure. The crude residue was purified by column chromatography on silica gel.



## Synthesis of 38, 39:

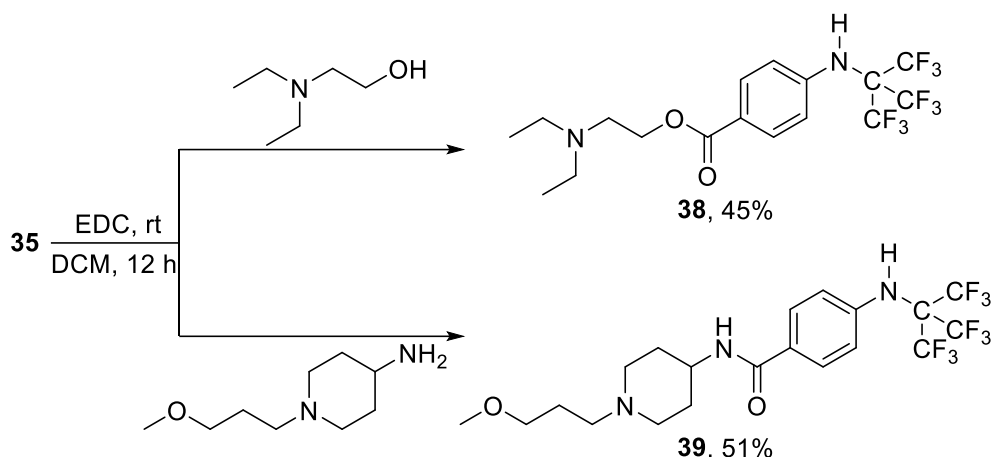

Alcohol or amine (0.75 mmol, 1.5 equiv.) was added into the mixture of compound **35** (0.5 mmol, 1.0 equiv.), EDC (0.75 mmol, 1.5 equiv.) and DMAP (0.05 mmol, 0.1 equiv.) in 2.0 mL DCM. The reaction was stirred at room temperature for 12 h. Upon completion, the solution was evaporated under reduced pressure. The crude residue was purified by column chromatography on silica gel.

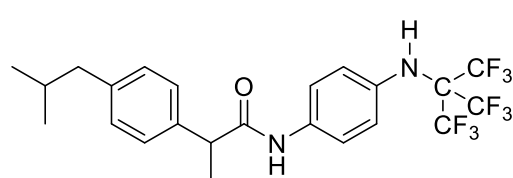

### *N*-(4-((1,1,1,3,3,3-hexafluoro-2-(trifluoromethyl)propan-2-yl)amino)phenyl)-2-(4-isobutylphenyl)propanamide (**36**).

Colorless wax, yield 97% (249 mg). Eluent: ethyl acetate/petroleum ether (10:90).  $^1\text{H}$

**NMR** (500 MHz,  $\text{CDCl}_3$ )  $\delta$  8.00 (s, 1H), 7.42 (d,  $J = 8.9$  Hz, 2H), 7.29 (d,  $J = 7.9$  Hz, 2H), 7.16 (d,  $J = 8.0$  Hz, 2H), 7.06 (d,  $J = 8.6$  Hz, 2H), 4.00 (s, 1H), 3.76 (q,  $J = 7.1$  Hz, 1H), 2.50 (d,  $J = 7.2$  Hz, 2H), 1.94 - 1.85 (m, 1H), 1.59 (d,  $J = 7.2$  Hz, 3H), 0.95 (d,  $J = 6.8$  Hz, 6H).  $^{19}\text{F}$  **NMR** (470 MHz,  $\text{CDCl}_3$ )  $\delta$  -68.5 (s, 9F).  $^{13}\text{C}$  **NMR** (126 MHz,  $\text{CDCl}_3$ )  $\delta$  172.3, 140.0, 137.0, 135.2, 134.0, 128.7, 126.3, 126.0, 120.1 (q,  $J = 291.0$  Hz), 119.4, 68.9 (m), 46.4, 44.0, 29.2, 21.3, 17.4. **HRMS** (EI):  $m/z$  calcd for  $\text{C}_{23}\text{H}_{23}\text{F}_9\text{N}_2\text{O}$ : 514.1661  $M^+$ ; Found 514.1665.

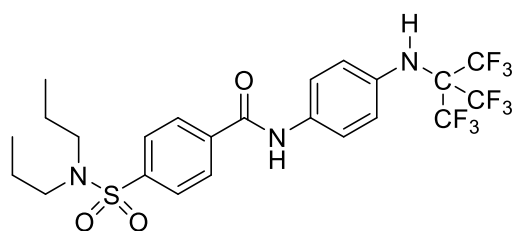

### 4-(*N,N*-dipropylsulfamoyl)-*N*-(4-((1,1,1,3,3,3-hexafluoro-2-(trifluoromethyl)propan-2-yl)amino)phenyl)benzamide (**37**).

White solid, M.p.: 222-224 °C, yield 81% (240 mg). Eluent: ethyl acetate/petroleum ether (20:80).  $^1\text{H}$  **NMR** (500 MHz,  $\text{DMSO-}d_6$ )

$\delta$  10.50 (s, 1H), 8.11 (d,  $J = 8.5$  Hz, 2H), 7.95 (d,  $J = 8.3$  Hz, 2H), 7.72 (d,  $J = 9.0$  Hz, 2H), 7.20 (d,  $J = 8.6$  Hz, 2H), 6.53 (s, 1H), 3.07 (t,  $J = 7.6$  Hz, 4H), 1.53 - 1.46 (m, 4H), 0.83 (t,  $J = 7.4$  Hz, 6H).  $^{19}\text{F}$  **NMR** (470 MHz,  $\text{DMSO-}d_6$ )  $\delta$  -67.5 (s, 9F).  $^{13}\text{C}$  **NMR**

(126 MHz, DMSO-d<sub>6</sub>)  $\delta$  164.8, 142.4, 138.9, 137.1, 135.7, 129.1, 128.3, 127.3, 121.5 (q,  $J = 293.1$  Hz), 121.0, 70.5 (m), 50.2, 22.1, 11.4. **HRMS** (EI):  $m/z$  calcd for C<sub>23</sub>H<sub>24</sub>F<sub>9</sub>N<sub>3</sub>O<sub>3</sub>S: 593.1389 M<sup>+</sup>; Found 593.1389.

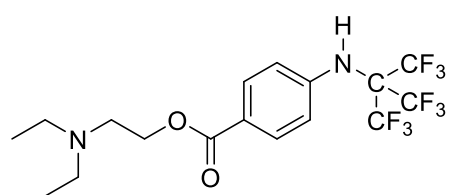

**2-(diethylamino)ethyl 4-((1,1,1,3,3,3-hexafluoro-2-(trifluoromethyl)propan-2-yl)amino)benzoate (38)**. Colorless oil, yield 45% (102 mg).

Eluent: ethyl acetate/petroleum ether (30:70). **<sup>1</sup>H NMR** (500 MHz, CDCl<sub>3</sub>)  $\delta$  7.94 (d,  $J = 8.9$  Hz,

2H), 7.08 (d,  $J = 8.6$  Hz, 2H), 4.40 (s, 1H), 4.34 (t,  $J = 6.3$  Hz, 2H), 2.81 (t,  $J = 6.3$  Hz, 2H), 2.60 (q,  $J = 7.2$  Hz, 4H), 1.04 (t,  $J = 7.2$  Hz, 6H). **<sup>19</sup>F NMR** (470 MHz, CDCl<sub>3</sub>)  $\delta$  -68.5 (s, 9F). **<sup>13</sup>C NMR** (126 MHz, CDCl<sub>3</sub>)  $\delta$  165.9, 144.2, 130.9, 126.4, 121.9, 121.0 (q,  $J = 291.9$  Hz), 69.9 (m), 63.4, 51.0, 47.8, 12.0. **HRMS** (EI):  $m/z$  calcd for C<sub>17</sub>H<sub>19</sub>F<sub>9</sub>N<sub>2</sub>O<sub>2</sub>: 454.1297 M<sup>+</sup>; Found 454.1292.

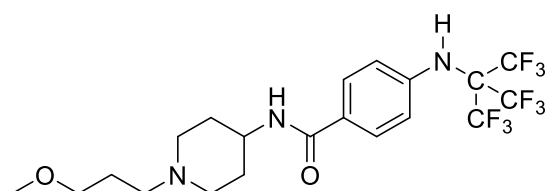

**4-((1,1,1,3,3,3-hexafluoro-2-(trifluoromethyl)propan-2-yl)amino)-N-(1-(3-methoxypropyl)piperidin-4-yl)benzamide (39)**. White solid, M.p.: 158-160 °C, yield 51% (130 mg). Eluent:

methanol/dichloromethane (10:90). **<sup>1</sup>H NMR** (500 MHz, DMSO-d<sub>6</sub>)  $\delta$  8.34 (d,  $J = 7.6$  Hz, 1H), 7.83 (d,  $J = 8.5$  Hz, 2H), 7.22 (d,  $J = 8.4$  Hz, 2H), 6.87 (s, 1H), 3.84 - 3.79 (m, 1H), 3.33 (t,  $J = 6.3$  Hz, 2H), 3.21 (s, 3H), 2.99 (d,  $J = 9.1$  Hz, 2H), 2.48 (s, 2H), 2.21 (s, 2H), 1.82 - 1.66 (m, 6H). **<sup>19</sup>F NMR** (470 MHz, DMSO-d<sub>6</sub>)  $\delta$  -67.5 (s, 9F). **<sup>13</sup>C NMR** (126 MHz, DMSO-d<sub>6</sub>)  $\delta$  165.5, 143.3, 131.1, 128.5, 124.4, 121.4 (q,  $J = 294.0$  Hz), 70.4, 70.4 (m), 58.2, 54.9, 52.3, 46.8, 31.1, 26.5. **HRMS** (EI):  $m/z$  calcd for C<sub>20</sub>H<sub>24</sub>F<sub>9</sub>N<sub>3</sub>O<sub>2</sub>: 509.1719 M<sup>+</sup>; Found 509.1719.

### Alkylation and acylation of the N-H bonds in *N*-PFtB secondary amines:

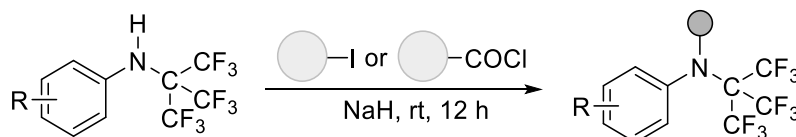

Iodide or acyl chloride (1.5 mmol, 5.0 equiv.) was added into the mixture of *N*-perfluoro-*tert*-butyl secondary amine (0.3 mmol, 1.0 equiv.) and NaH (3.0 mmol, 10.0 equiv.; 40% oil dispersion, washed with Et<sub>2</sub>O to remove mineral oil) in 1.5 mL dry THF. The reaction was stirred at room temperature for 12 h. Upon completion, the crude mixture was filtered and evaporated under reduced pressure. The crude residue was purified by column chromatography on silica gel.

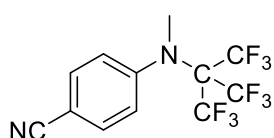

**4-((1,1,1,3,3,3-hexafluoro-2-(trifluoromethyl)propan-2-yl)methyl)amino)benzonitrile (40).** White solid, M.p.: 31-32 °C, yield 89% (93 mg). Eluent: ethyl acetate/petroleum ether (2:98).  $^1\text{H NMR}$  (500 MHz,  $\text{CDCl}_3$ )  $\delta$  7.66 (d,  $J = 8.6$  Hz, 2H), 7.42 (d,  $J = 8.4$  Hz, 2H), 3.04 (s, 3H).  $^{19}\text{F NMR}$  (470 MHz,  $\text{CDCl}_3$ )  $\delta$  -65.1 (s, 9F).  $^{13}\text{C NMR}$  (126 MHz,  $\text{CDCl}_3$ )  $\delta$  151.6, 133.4, 131.3, 121.3 (q,  $J = 296.0$  Hz), 118.0, 111.9, 73.6 (m), 42.9 (m). **HRMS** (EI):  $m/z$  calcd for  $\text{C}_{12}\text{H}_7\text{F}_9\text{N}_2$ : 350.0460  $M^+$ ; Found 350.0462.

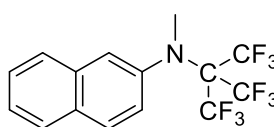

**N-(1,1,1,3,3,3-hexafluoro-2-(trifluoromethyl)propan-2-yl)-N-methylnaphthalen-2-amine (41).** Colorless oil, yield 93% (105 mg). Eluent: petroleum ether.  $^1\text{H NMR}$  (500 MHz,  $\text{CDCl}_3$ )  $\delta$  7.86 - 7.81 (m, 4H), 7.53 - 7.49 (m, 2H), 7.42 (d,  $J = 8.7$  Hz, 1H), 3.14 (s, 3H).  $^{19}\text{F NMR}$  (470 MHz,  $\text{CDCl}_3$ )  $\delta$  -65.0 (s, 9F).  $^{13}\text{C NMR}$  (126 MHz,  $\text{CDCl}_3$ )  $\delta$  144.9, 133.7, 132.4, 129.1, 128.9, 128.1, 128.0, 127.5, 126.6, 126.3, 121.7 (q,  $J = 296.5$  Hz), 74.0 (m), 43.2 (m). **HRMS** (EI):  $m/z$  calcd for  $\text{C}_{15}\text{H}_{10}\text{F}_9\text{N}$ : 375.0664  $M^+$ ; Found 375.0665.

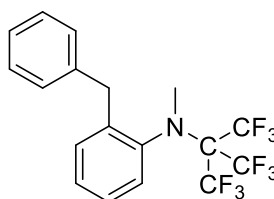

**2-benzyl-N-(1,1,1,3,3,3-hexafluoro-2-(trifluoromethyl)propan-2-yl)-N-methylaniline (42).** Colorless oil, yield 95% (118 mg). Eluent: petroleum ether.  $^1\text{H NMR}$  (500 MHz,  $\text{CDCl}_3$ )  $\delta$  7.58 (t,  $J = 4.5$  Hz, 1H), 7.46 (t,  $J = 7.5$  Hz, 2H), 7.39 - 7.35 (m, 5H), 7.34 - 7.31 (m, 1H), 4.43 (d,  $J = 15.7$  Hz, 1H), 4.16 (d,  $J = 15.7$  Hz, 1H), 2.96 (s, 3H).  $^{19}\text{F NMR}$  (470 MHz,  $\text{CDCl}_3$ )  $\delta$  -65.4 (s, 9F).  $^{13}\text{C NMR}$  (126 MHz,  $\text{CDCl}_3$ )  $\delta$  145.8, 141.5, 140.6, 131.2, 129.4, 129.4, 128.6, 128.0, 127.4, 126.2, 121.8 (q,  $J = 296.4$  Hz), 74.7 (m), 42.6 (m), 36.9. **HRMS** (EI):  $m/z$  calcd for  $\text{C}_{18}\text{H}_{14}\text{F}_9\text{N}$ : 415.0977  $M^+$ ; Found 415.0973.

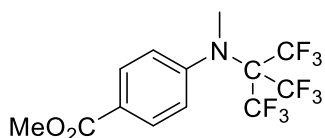

**methyl 4-((1,1,1,3,3,3-hexafluoro-2-(trifluoromethyl)propan-2-yl)methyl)amino)benzoate (43).** Colorless oil, yield 61% (70 mg). Eluent: ethyl acetate/petroleum ether (1:99).  $^1\text{H NMR}$  (500 MHz,  $\text{CDCl}_3$ )  $\delta$  8.02 (d,  $J = 8.6$  Hz, 2H), 7.38 (d,  $J = 8.4$  Hz, 2H), 3.92 (s, 3H), 3.05 (s, 3H).  $^{19}\text{F NMR}$  (470 MHz,  $\text{CDCl}_3$ )  $\delta$  -65.1 (s, 9F).  $^{13}\text{C NMR}$  (126 MHz,  $\text{CDCl}_3$ )  $\delta$  166.4, 151.7, 130.7, 130.2, 129.5, 121.5 (q,  $J = 295.8$  Hz), 73.7 (m), 52.1, 42.9 (m). **HRMS** (EI):  $m/z$  calcd for  $\text{C}_{13}\text{H}_{10}\text{F}_9\text{NO}_2$ : 383.0562  $M^+$ ; Found 383.0566.

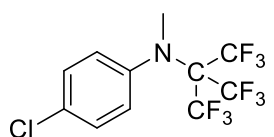

**4-chloro-N-(1,1,1,3,3,3-hexafluoro-2-(trifluoromethyl)propan-2-yl)-N-methylaniline (44).** Colorless oil, yield 90% (97 mg). Eluent: petroleum ether.  $^1\text{H NMR}$  (500 MHz,  $\text{CDCl}_3$ )  $\delta$  7.37 (d,  $J = 8.8$  Hz, 2H), 7.30 (d,  $J = 8.6$  Hz, 2H), 3.08 (s, 3H).  $^{19}\text{F NMR}$  (470 MHz,  $\text{CDCl}_3$ )  $\delta$  -65.4 (s, 9F).  $^{13}\text{C NMR}$  (126 MHz,  $\text{CDCl}_3$ )  $\delta$  146.0, 133.6, 131.6, 129.5, 121.5 (q,  $J = 296.4$  Hz), 73.7 (m), 43.1 (m). **HRMS** (EI):  $m/z$  calcd for  $\text{C}_{11}\text{H}_7\text{ClF}_9\text{N}$ : 359.0118  $M^+$ ; Found 359.0121.

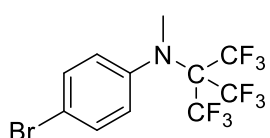

**4-bromo-*N*-(1,1,1,3,3,3-hexafluoro-2-(trifluoromethyl)propan-2-yl)-*N*-methylaniline (45).** Colorless oil, yield 85% (103 mg). Eluent: petroleum ether.  $^1\text{H NMR}$  (500 MHz,  $\text{CDCl}_3$ )  $\delta$  7.47 (d,  $J = 8.7$  Hz, 2H), 7.19 (d,  $J = 8.4$  Hz, 2H), 3.03 (s, 3H).  $^{19}\text{F NMR}$  (470 MHz,  $\text{CDCl}_3$ )  $\delta$  -65.4 (s, 9F).  $^{13}\text{C NMR}$  (126 MHz,  $\text{CDCl}_3$ )  $\delta$  146.6, 132.5, 131.9, 121.6, 121.5 (q,  $J = 294.6$  Hz), 73.6 (m), 43.1 (m). **HRMS** (EI):  $m/z$  calcd for  $\text{C}_{11}\text{H}_7\text{BrF}_9\text{N}$ : 402.9613  $\text{M}^+$ ; Found 402.9614.

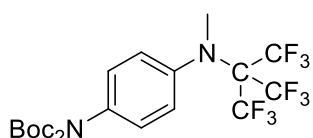

***tert*-butyl (*tert*-butoxycarbonyl)(4-((1,1,1,3,3,3-hexafluoro-2-(trifluoromethyl)propan-2-yl)(methylamino)phenyl)carbamate (46).** White solid, M.p.: 99-100 °C, yield 66% (107 mg). Eluent: ethyl acetate/petroleum ether (2:98).  $^1\text{H NMR}$  (500 MHz,  $\text{CDCl}_3$ )  $\delta$  7.28 (d,  $J = 8.4$  Hz, 2H), 7.08 (d,  $J = 8.7$  Hz, 2H), 3.03 (s, 3H), 1.38 (s, 18H).  $^{19}\text{F NMR}$  (470 MHz,  $\text{CDCl}_3$ )  $\delta$  -65.1 (s, 9F).  $^{13}\text{C NMR}$  (126 MHz,  $\text{CDCl}_3$ )  $\delta$  151.4, 146.4, 138.9, 130.4, 128.7, 121.5 (q,  $J = 294.4$  Hz), 82.8, 73.9 (m), 43.0 (m), 27.8. **HRMS** (EI):  $m/z$  calcd for  $\text{C}_{21}\text{H}_{25}\text{F}_9\text{N}_2\text{O}_4$ : 540.1665  $\text{M}^+$ ; Found 540.1669.

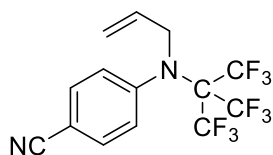

**4-(allyl(1,1,1,3,3,3-hexafluoro-2-(trifluoromethyl)propan-2-yl)amino)benzonitrile (47).** Colorless oil, yield 50% (57 mg). Eluent: ethyl acetate/petroleum ether (2:98).  $^1\text{H NMR}$  (500 MHz,  $\text{CDCl}_3$ )  $\delta$  7.63 (d,  $J = 8.5$  Hz, 2H), 7.34 (d,  $J = 8.3$  Hz, 2H), 5.67 - 5.59 (m, 1H), 4.92 (d,  $J = 10.1$  Hz, 1H), 4.74 (d,  $J = 17.1$  Hz, 1H), 3.92 (d,  $J = 6.8$  Hz, 2H).  $^{19}\text{F NMR}$  (470 MHz,  $\text{CDCl}_3$ )  $\delta$  -65.0 (s, 9F).  $^{13}\text{C NMR}$  (126 MHz,  $\text{CDCl}_3$ )  $\delta$  148.0, 133.2, 133.0, 132.8, 121.3 (q,  $J = 295.5$  Hz), 119.3, 118.1, 112.1, 74.1 (m), 57.0 (m). **HRMS** (EI):  $m/z$  calcd for  $\text{C}_{14}\text{H}_9\text{F}_9\text{N}_2$ : 376.0617  $\text{M}^+$ ; Found 376.0619.

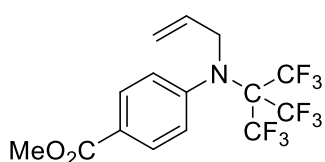

**methyl 4-(allyl(1,1,1,3,3,3-hexafluoro-2-(trifluoromethyl)propan-2-yl)amino)benzoate (48).** Colorless oil, yield 70% (86 mg). Eluent: ethyl acetate/petroleum ether (1:99).  $^1\text{H NMR}$  (500 MHz,  $\text{CDCl}_3$ )  $\delta$  7.98 (d,  $J = 8.7$  Hz, 2H), 7.29 (d,  $J = 8.4$  Hz, 2H), 5.68 - 5.60 (m, 1H), 4.86 (d,  $J = 10.1$  Hz, 1H), 4.72 (d,  $J = 17.6$  Hz, 1H), 3.92 (d,  $J = 6.8$  Hz, 2H), 3.89 (s, 3H).  $^{19}\text{F NMR}$  (470 MHz,  $\text{CDCl}_3$ )  $\delta$  -65.1 (s, 9F).  $^{13}\text{C NMR}$  (126 MHz,  $\text{CDCl}_3$ )  $\delta$  166.3, 148.1, 133.4, 132.1, 130.1, 129.7, 121.4 (q,  $J = 295.7$  Hz), 118.6, 74.2 (m), 56.9 (m), 52.06. **HRMS** (EI):  $m/z$  calcd for  $\text{C}_{15}\text{H}_{12}\text{F}_9\text{NO}_2$ : 409.0719  $\text{M}^+$ ; Found 409.0723.

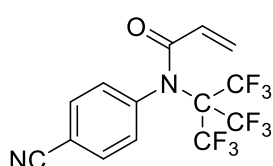

***N*-(4-cyanophenyl)-*N*-(1,1,1,3,3,3-hexafluoro-2-(trifluoromethyl)propan-2-yl)acrylamide (49).** White solid, M.p.: 133-135 °C, yield 51% (60 mg). Eluent: ethyl acetate/petroleum ether (3:97).  $^1\text{H NMR}$  (500 MHz,  $\text{CDCl}_3$ )  $\delta$  7.78 (d,  $J = 8.5$  Hz, 2H), 7.47 (d,  $J = 8.2$  Hz, 2H), 6.40 - 6.33 (m, 1H), 5.57 - 5.50 (m, 2H).  $^{19}\text{F NMR}$  (470 MHz,  $\text{CDCl}_3$ )  $\delta$  -61.9 (s, 9F).  $^{13}\text{C NMR}$  (126 MHz,  $\text{CDCl}_3$ )  $\delta$

166.2, 142.5, 133.5, 132.9, 131.6, 128.0, 120.7 (q,  $J = 295.3$  Hz), 117.2, 114.7, 74.6 (m). **HRMS** (EI):  $m/z$  calcd for  $C_{14}H_7F_9N_2O$ : 390.0409  $M^+$ ; Found 390.0402.

## 7. Stability study of compound 1

To a solution of the studied compound (0.035 mmol) in MeCN-d<sub>3</sub> (0.75 mL) was added 0.25 mL of either aqueous HCl or NaOH (respective pH 0 and 14). Cyclohexadiene (1~2 μL) was added as an internal standard. The reactions were stirred at room temperature. The solution was filtered through magnesium sulphate. The mixtures were analyzed by <sup>1</sup>H NMR.

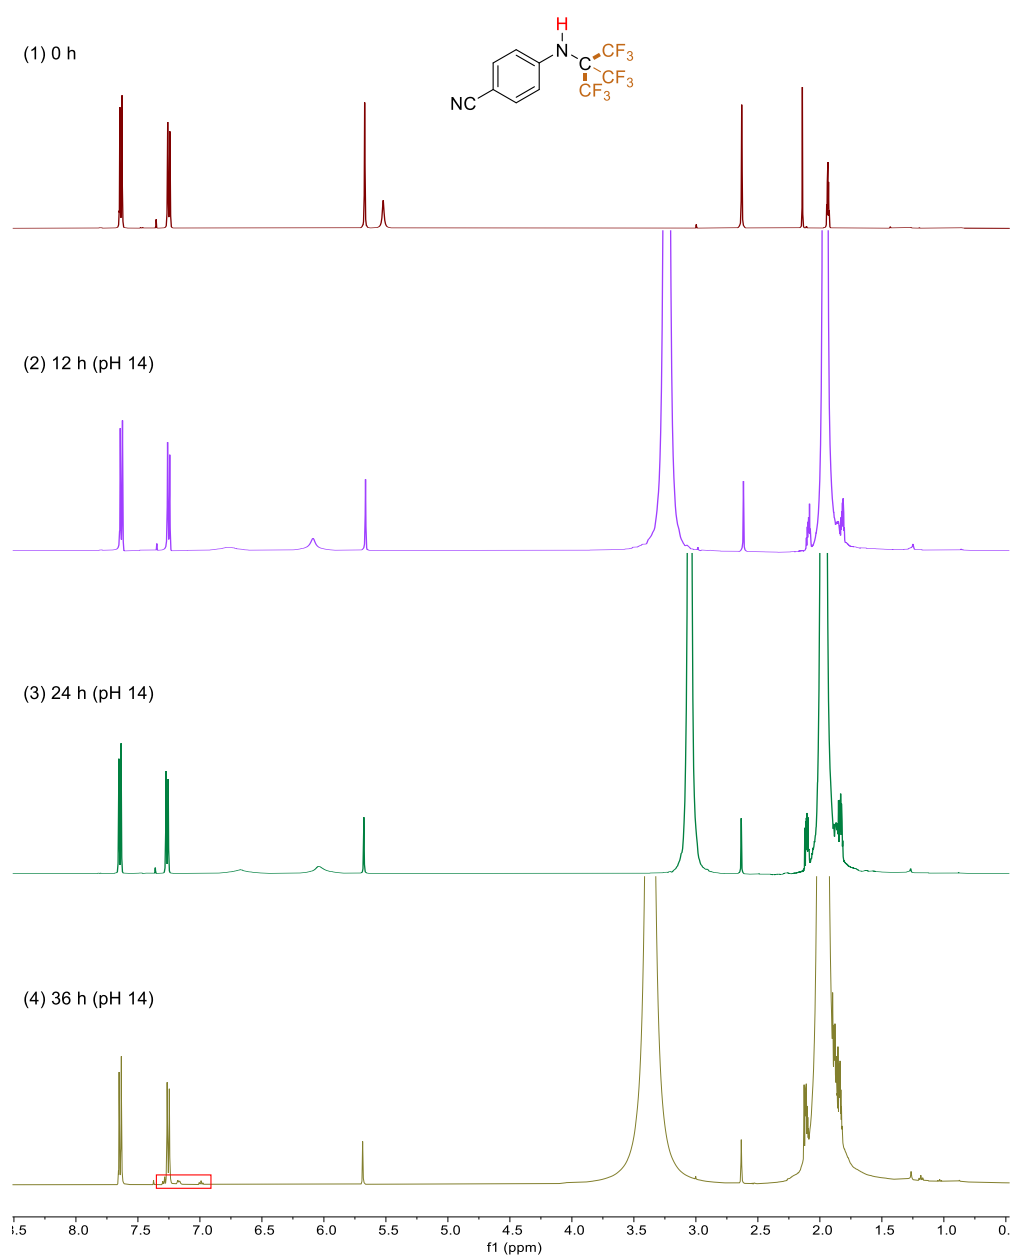

**Supplementary Figure S10. <sup>1</sup>H NMR stacked spectra of stability test of compound 1 in aqueous NaOH.**

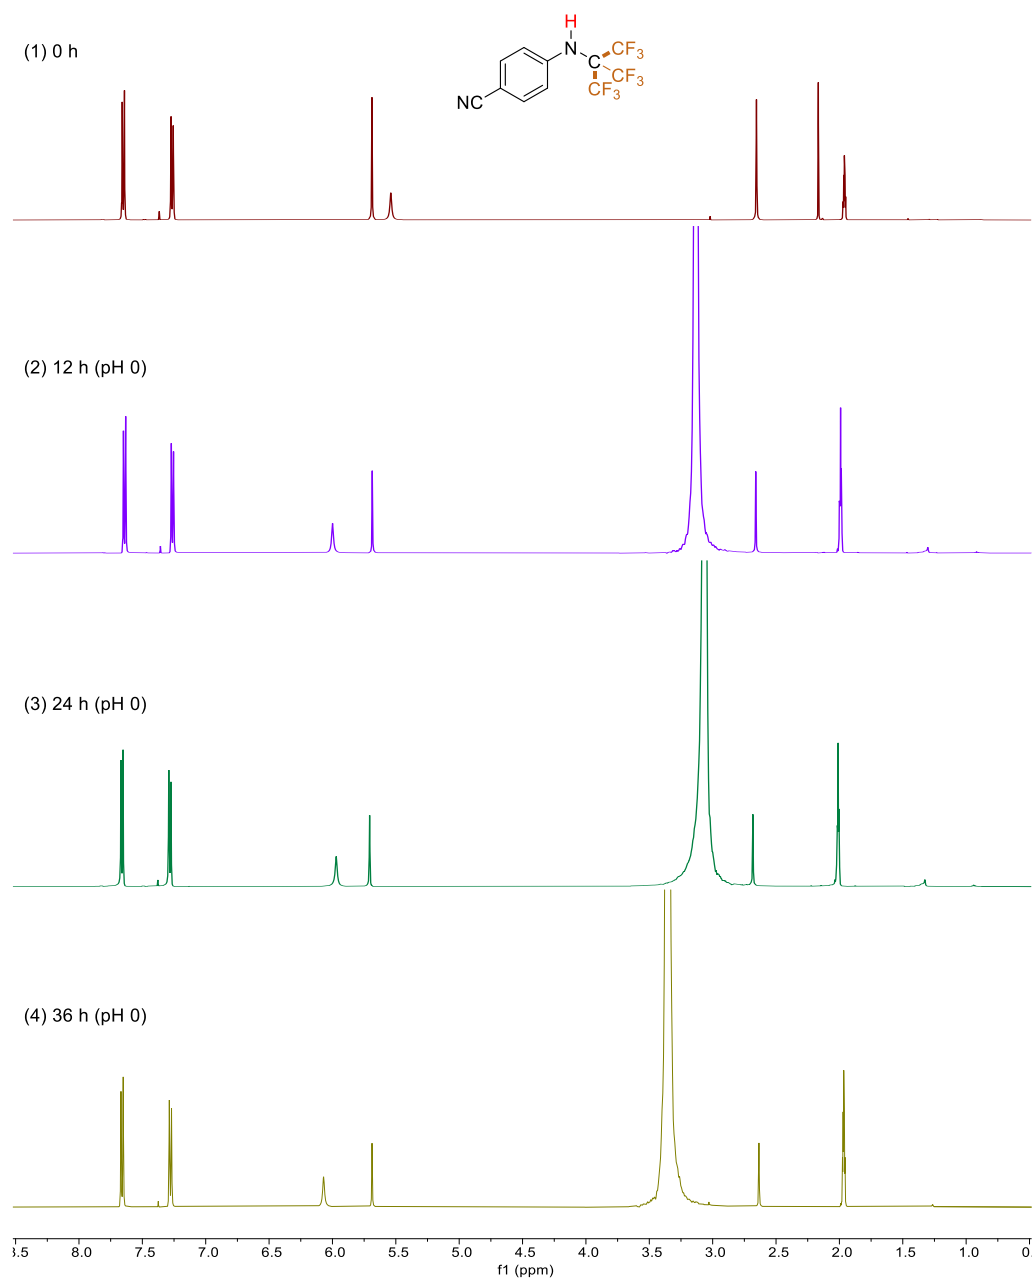

**Supplementary Figure S11. <sup>1</sup>H NMR stacked spectra of stability test of compound 1 in aqueous HCl.**

## 8. $^{19}\text{F}$ MRI Experiment

Five different concentrations of compound **36** (25, 50, 75, 100, 125 mM in MeCN) were compared with the negative control ( $\text{H}_2\text{O}$ ) and the positive control ( $\text{CF}_4$ , 15mg/mL). The data were recorded on a Bruker 9.4 T BioSpec 94/30 MRI & PET Insert.

Supplementary Table S1. Experimental data of  $^{19}\text{F}$  MRI.

| Concentration (mM) | Values |      |      |
|--------------------|--------|------|------|
| 25                 | 81.3   | 82.4 | 76.4 |
| 50                 | 57.4   | 59.2 | 58.4 |
| 75                 | 36.1   | 36.5 | 37.4 |
| 100                | 26.0   | 26.1 | 27.2 |
| 125                | 11.3   | 13.5 | 11.8 |

Original

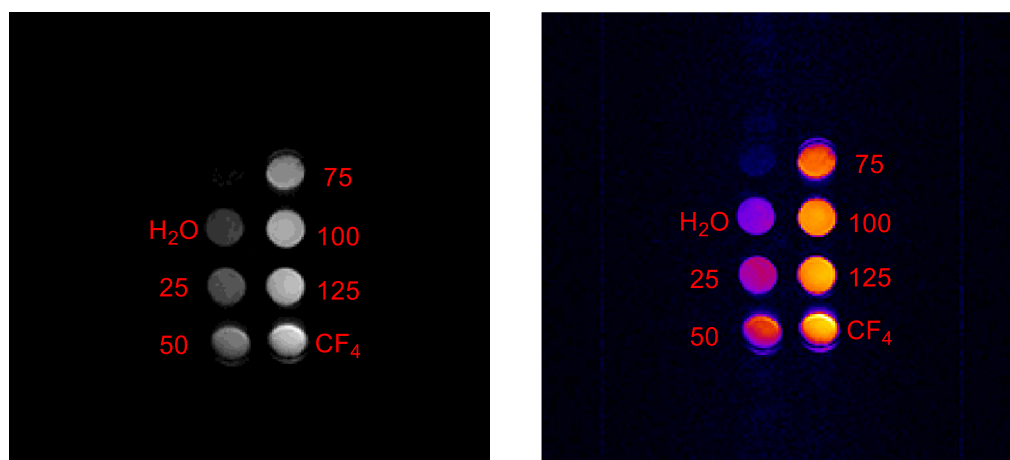

Supplementary Figure S12.  $^{19}\text{F}$  MR imaging of compound **36**.



## 9. Crystallographic data for compound 11

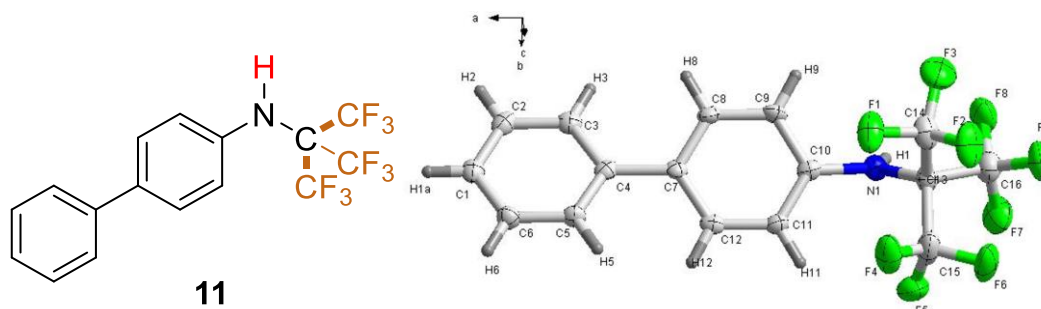

| Compound                                                         | <b>11</b>                                                      |
|------------------------------------------------------------------|----------------------------------------------------------------|
| Formula                                                          | C <sub>32</sub> H <sub>20</sub> F <sub>18</sub> N <sub>2</sub> |
| Formula weight                                                   | 774.50                                                         |
| Crystal system                                                   | Pca2 <sub>1</sub>                                              |
| space group                                                      | Orthorhombic                                                   |
| <i>a</i> (Å)                                                     | 37.282(2)                                                      |
| <i>b</i> (Å)                                                     | 7.7234(5)                                                      |
| <i>c</i> (Å)                                                     | 10.7769(6)                                                     |
| $\alpha$ (°)                                                     | 90                                                             |
| $\beta$ (°)                                                      | 90                                                             |
| $\gamma$ (°)                                                     | 90                                                             |
| Volume(Å <sup>3</sup> )                                          | 3103.1(3)                                                      |
| <i>Z</i>                                                         | 4                                                              |
| <i>T</i> (K)                                                     | 193.15                                                         |
| <i>D</i> <sub>calcd</sub> (g•cm <sup>-3</sup> )                  | 1.658                                                          |
| <i>F</i> (000)                                                   | 1552                                                           |
| Reflections collected                                            | 18441                                                          |
| Unique reflections                                               | 5369                                                           |
| Goof                                                             | 1.088                                                          |
| <i>R</i> <sub>1</sub> <sup>a</sup> [ <i>I</i> > 2σ( <i>I</i> )]  | 0.0721                                                         |
| <i>wR</i> <sub>2</sub> <sup>b</sup> [ <i>I</i> > 2σ( <i>I</i> )] | 0.1499                                                         |
| CCDC NO.                                                         | 2256453                                                        |

## 10. References

- (1) Frisch, M. J.; Trucks, G. W.; Schlegel, H. B.; Scuseria, G. E.; Robb, M. A.; Cheeseman, J. R.; Scalmani, G.; Barone, V.; Petersson, G. A.; Nakatsuji, H.; Li, X.; Caricato, M.; Marenich, A. V.; Bloino, J.; Janesko, B. G.; Gomperts, R.; Mennucci, B.; Hratchian, H. P.; Ortiz, J. V.; Izmaylov, A. F.; Sonnenberg, J. L.; Williams, D. J.; Ding, F.; Lipparini, F.; Egidi, F.; Goings, J.; Peng, B.; Petrone, A.; Henderson, T.; Ranasinghe, D.; Zakrzewski, V. G.; Gao, J.; Rega, N.; Zheng, G.; Liang, W.; Hada, M.; Ehara, M.; Toyota, K.; Fukuda, R.; Hasegawa, J.; Ishida, M.; Nakajima, T.; Honda, Y.; Kitao, O.; Nakai, H.; Vreven, T.; Throssell, K.; Montgomery, Jr., J. A.; Peralta, J. E.; Ogliaro, F.; Bearpark, M. J.; Heyd, J. J.; Brothers, E. N.; Kudin, K. N.; Staroverov, V. N.; Keith, T. A.; Kobayashi, R.; Normand, J.; Raghavachari, K.; Rendell, A. P.; Burant, J. C.; Iyengar, S. S.; Tomasi, J.; Cossi, M.; Millam, J. M.; Klene, M.; Adamo, C.; Cammi, R.; Ochterski, J. W.; Martin, R. L.; Morokuma, K.; Farkas, O.; Foresman, J. B.; Fox, D. J. Gaussian 16, Revision A.01; Gaussian, Inc.: Wallingford, CT, 2016.
- (2) Vetere, V.; Adamo, C.; Maldivi, P. Performance of the 'Parameter Free' PBE0 Functional for the Modeling of Molecular Properties of Heavy Metals. *Chem. Phys. Lett.* **2000**, *325* (1-3), 99-105.
- (3) Grimme, S.; Antony, J.; Ehrlich, S.; Krieg, H. A Consistent and Accurate ab Initio parametrization of Density Functional Dispersion Correction (DFT-D) for the 94 Elements H-Pu. *J. Chem. Phys.* **2010**, *132* (15), 154104.
- (4) Weigend, F.; Ahlrichs, R. Balanced Basis Sets of Split Valence, Triple Zeta Valence and Quadruple Zeta Valence Quality for H to Rn: Design and Assessment of Accuracy. *Phys Chem Chem Phys.* **2005**, *7* (18), 3297-3305.
- (5) Marenich, A. V.; Cramer, C. J.; Truhlar, D. G. Universal Solvation Model Based on Solute Electron Density and on a Continuum Model of the Solvent Defined by the Bulk Dielectric Constant and Atomic Surface Tensions. *J. Phys. Chem. B.* **2009**, *113* (18), 6378-6396.
- (6) Wang, L.; Wang, J.; Ye, S.; Jiang, B.; Guo, Z.; Mumtaz, Y.; Yi, W. General Access to *N*-CF<sub>3</sub> Secondary Amines and Their Transformation to *N*-CF<sub>3</sub> Sulfonamides. *Angew. Chem., Int. Ed.* **2022**, *61* (49), e202212115.
- (7) Petrov, V. A. Reaction of Polyfluorinated Imines with Trifluoromethyltrimethylsilane. Direct Synthesis of *N*-(perfluoro-*t*-butyl)amines. *Tetrahedron Lett.* **2000**, *41* (36), 6959-6963.

# 11. NMR Spectra

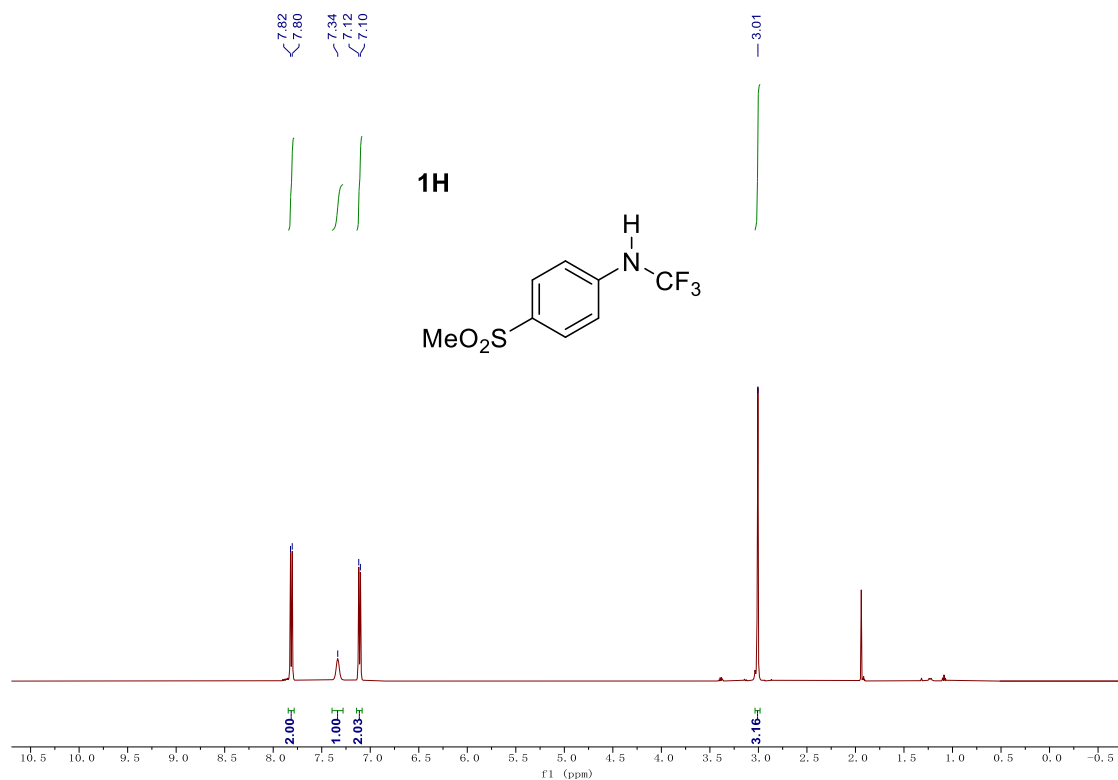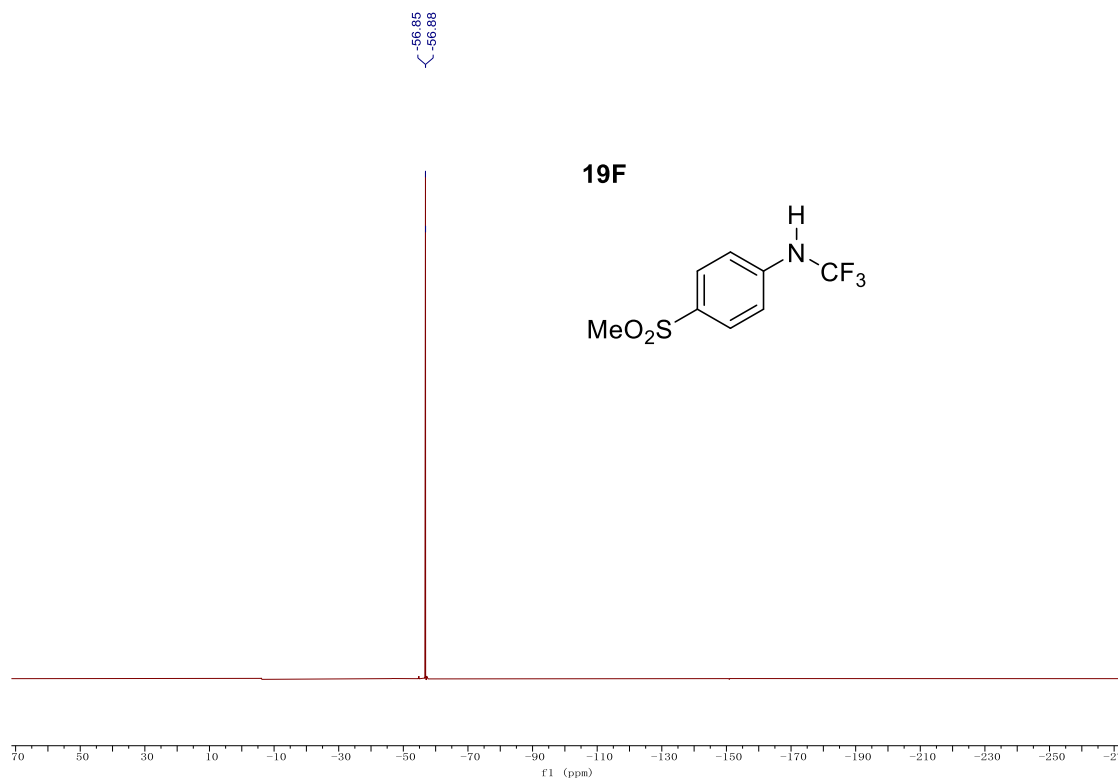

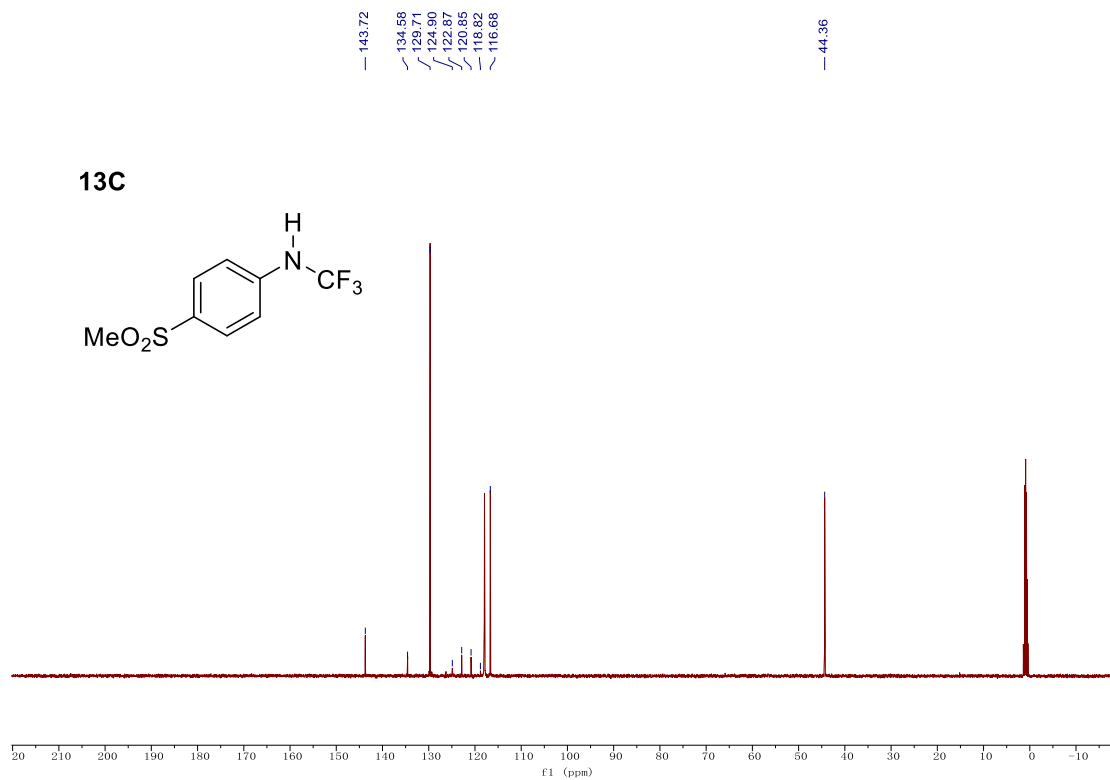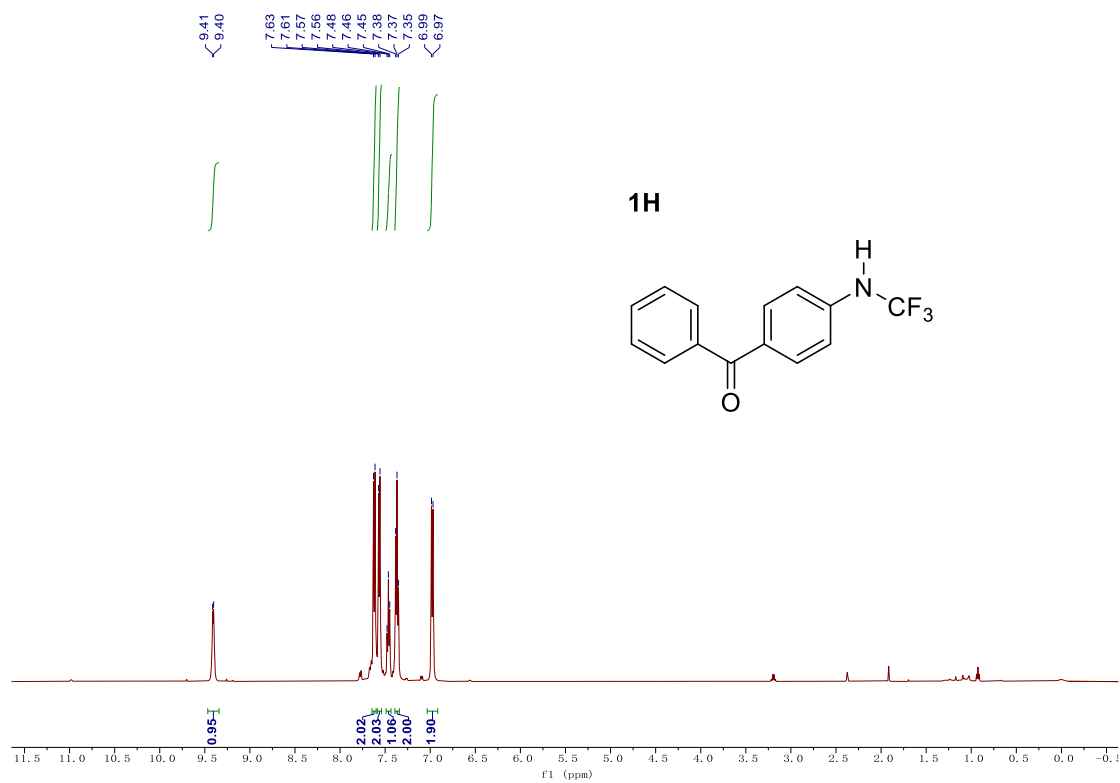

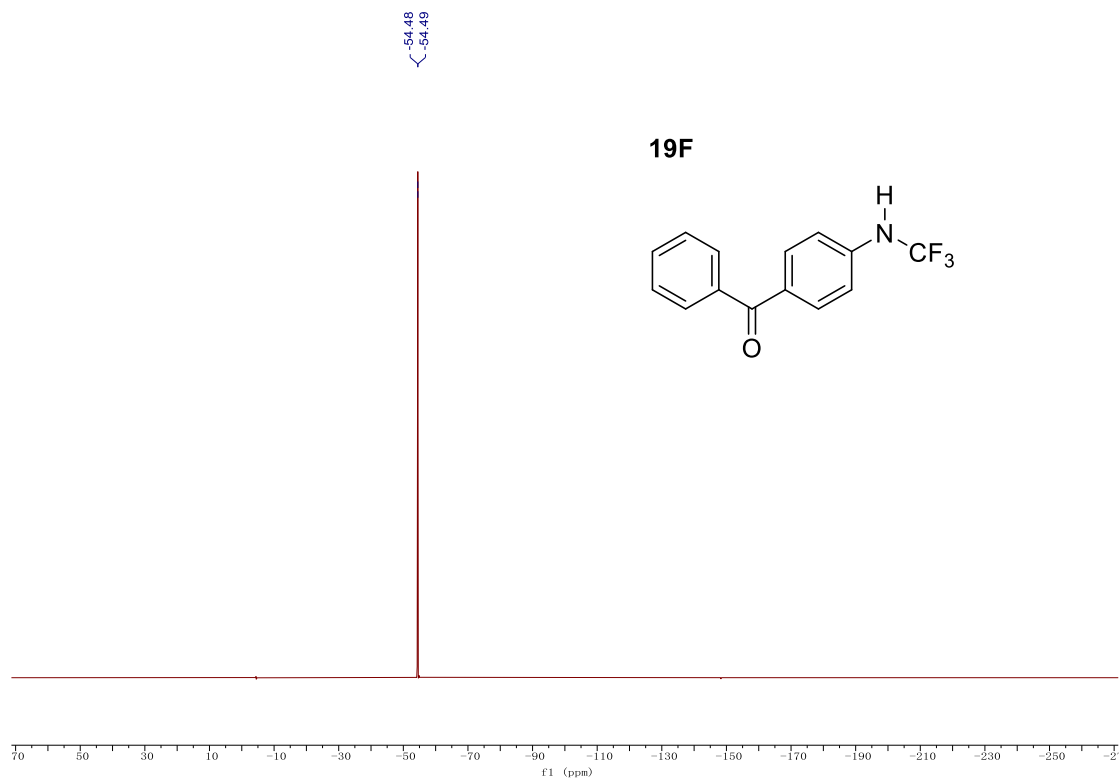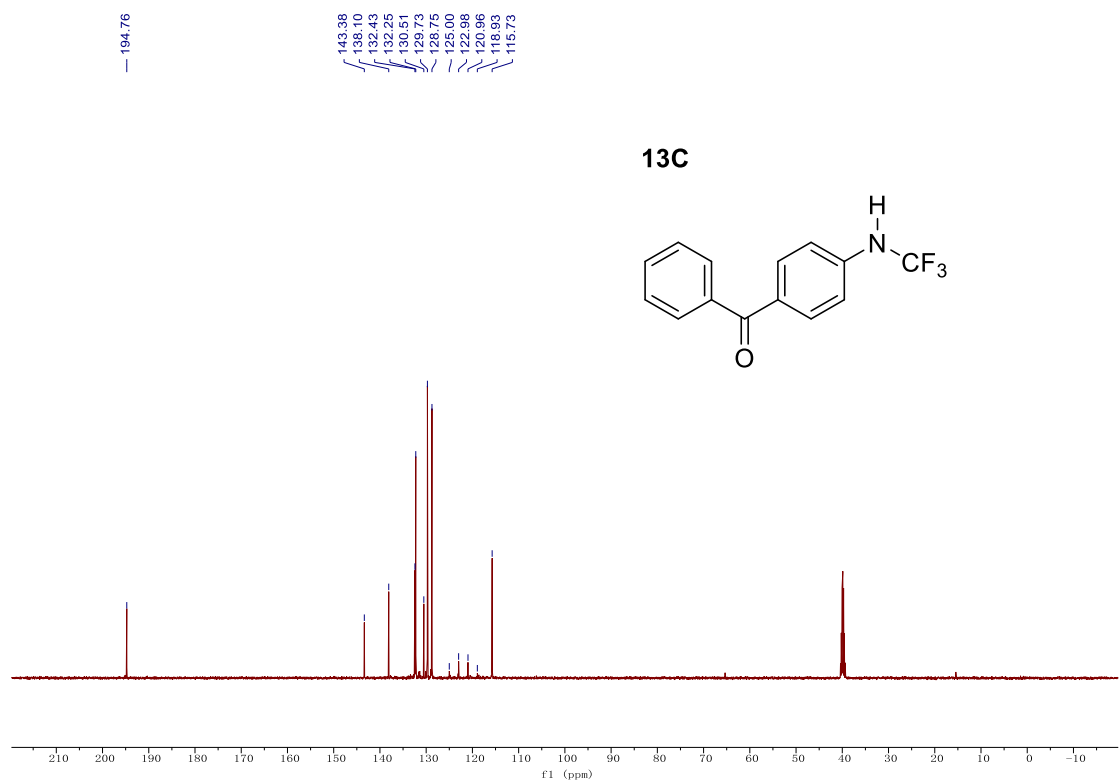

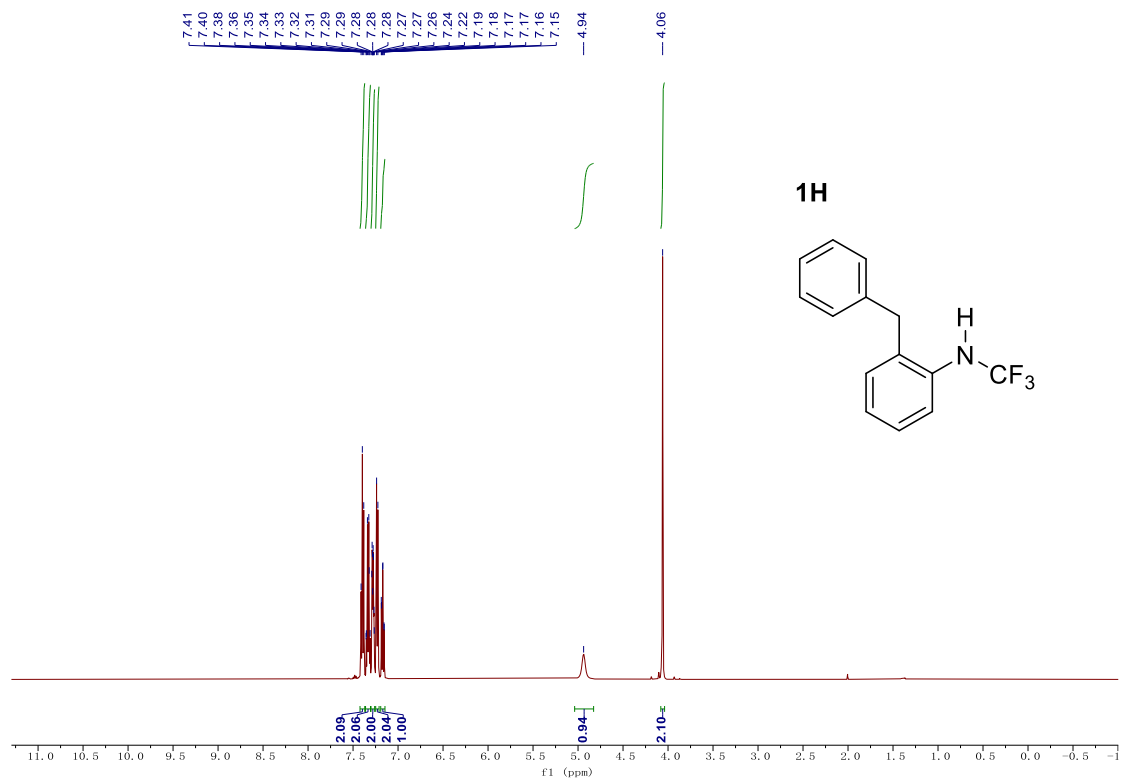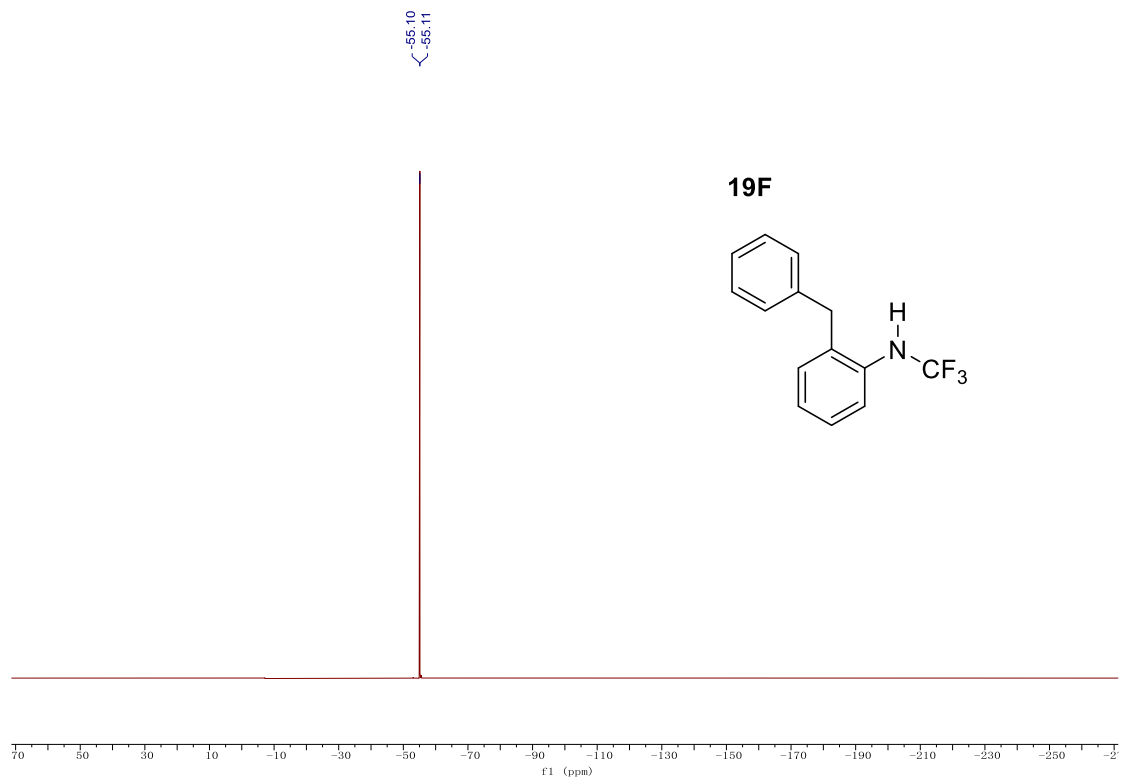

**13C**

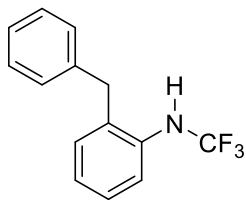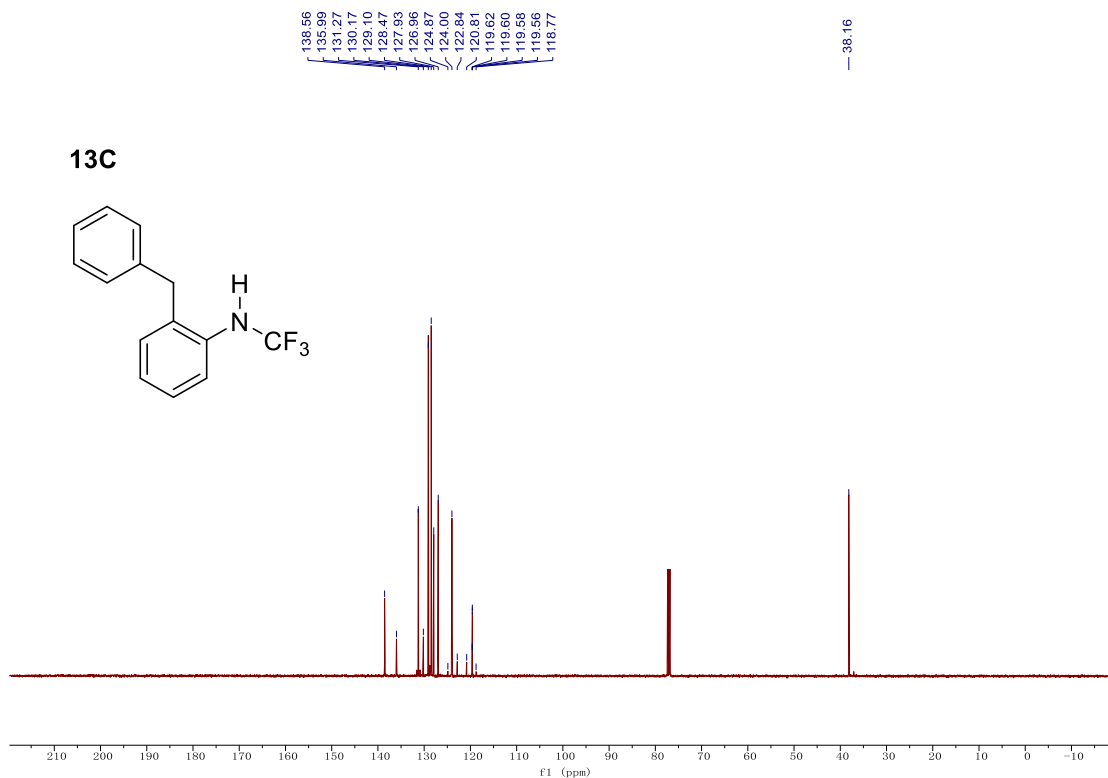

**1H**

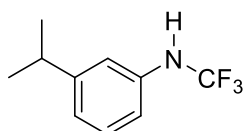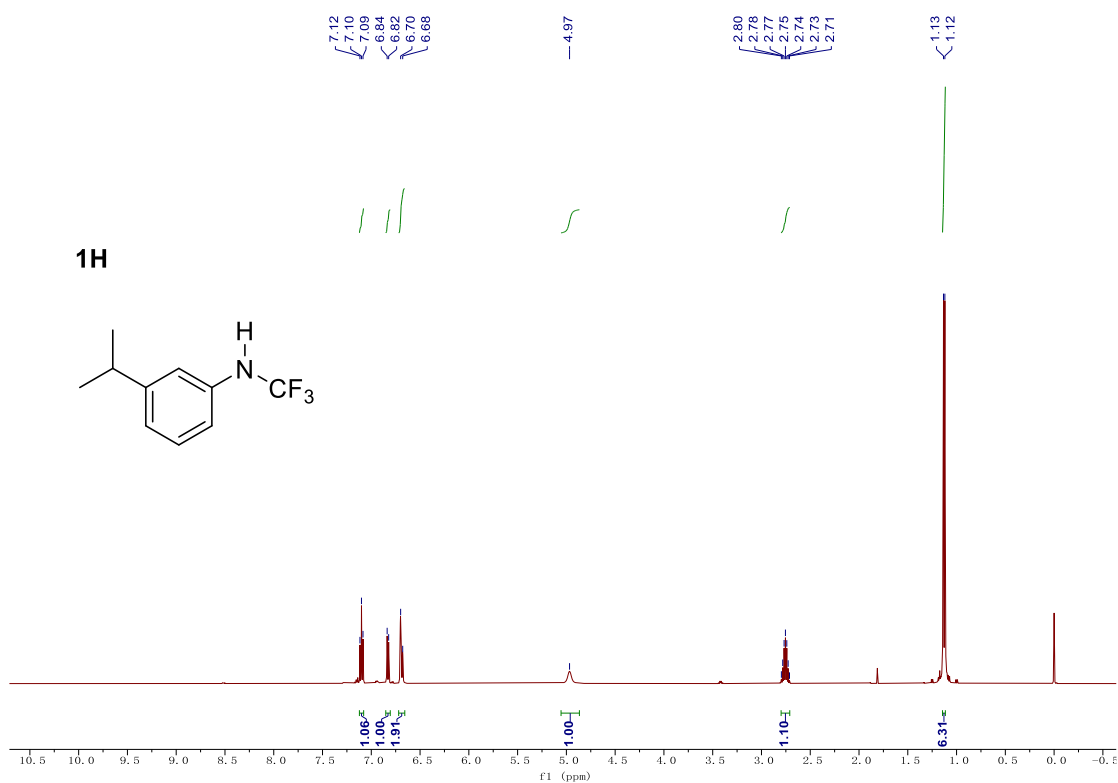

**19F**

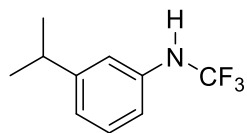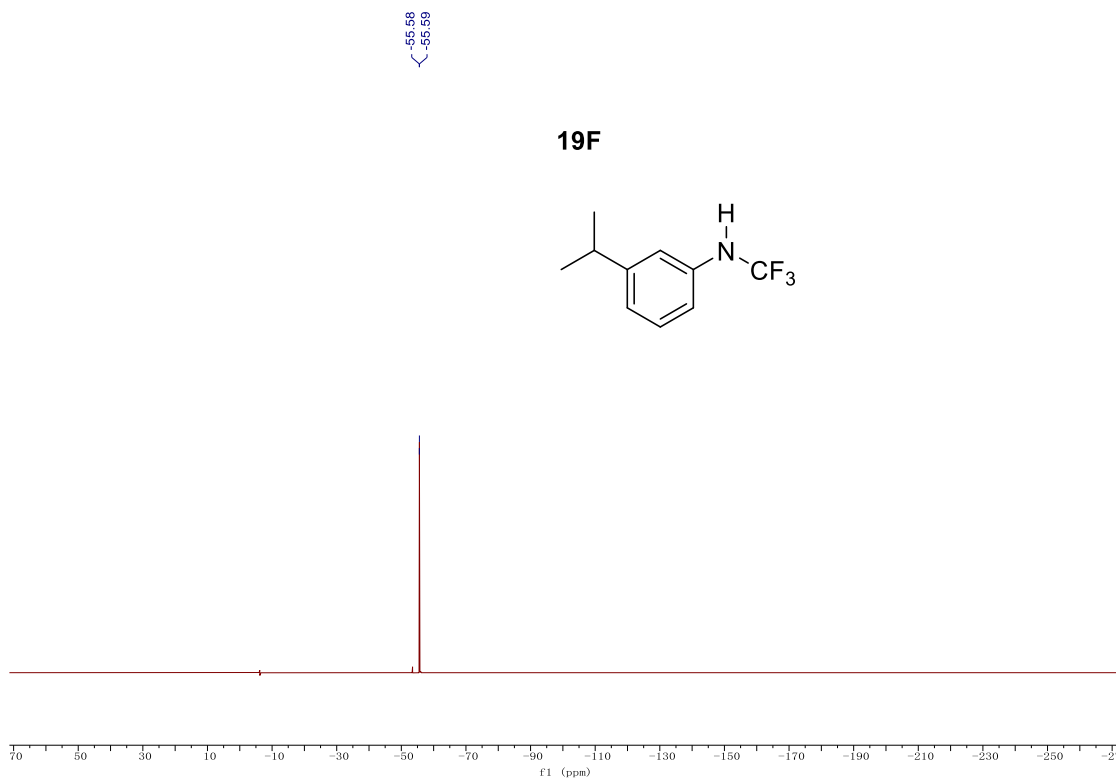

**13C**

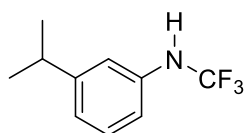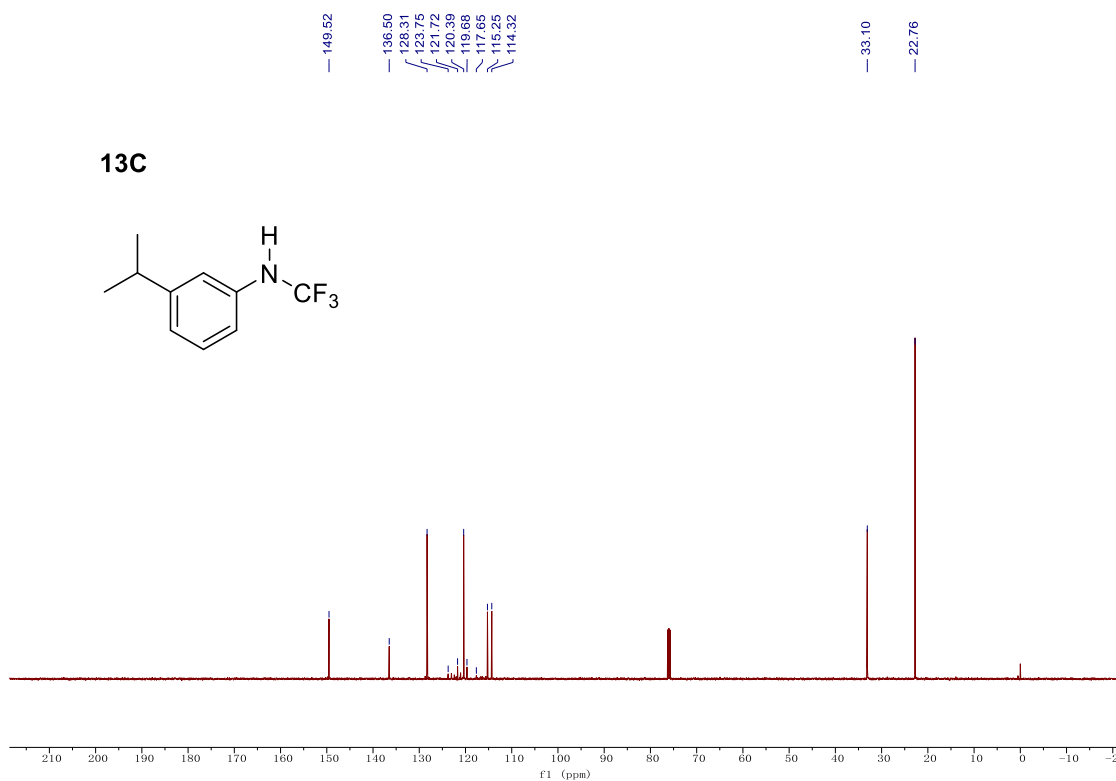



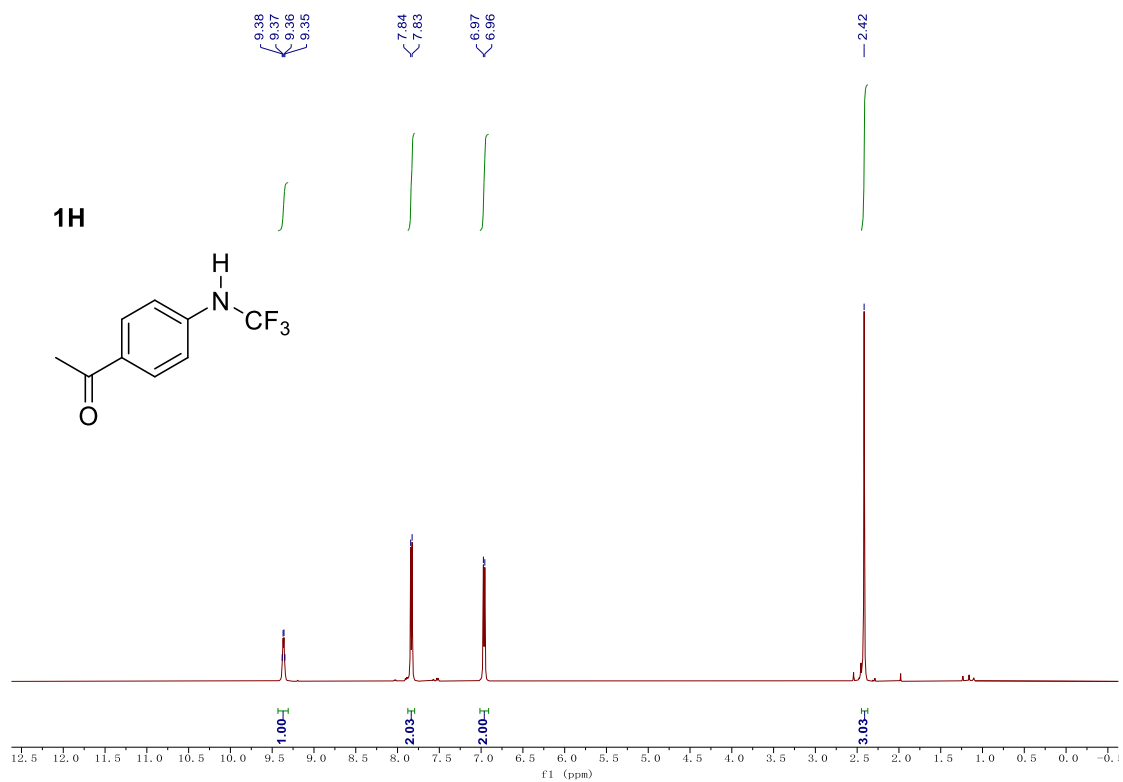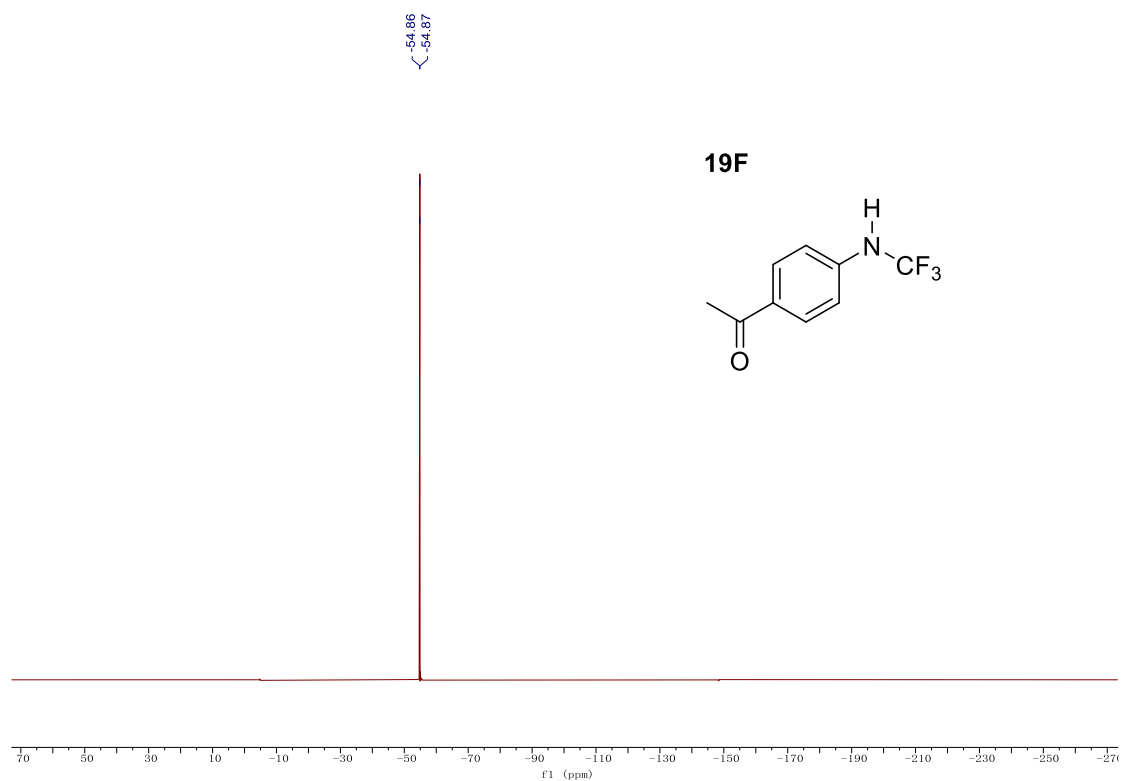

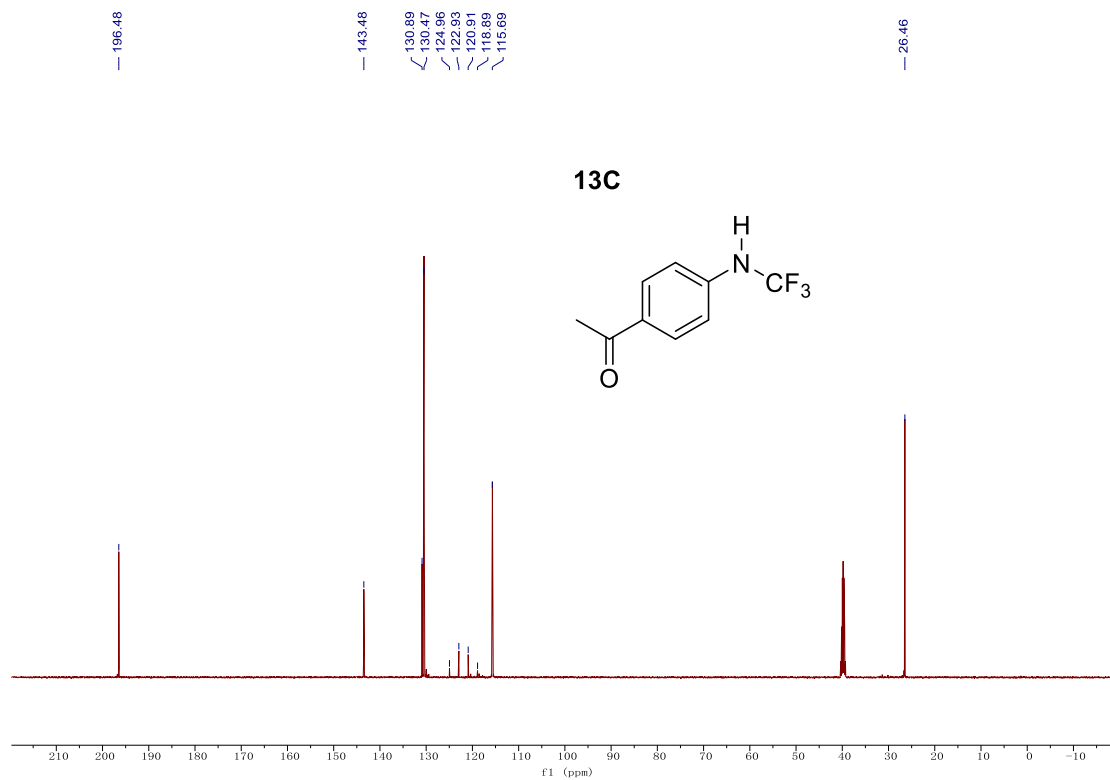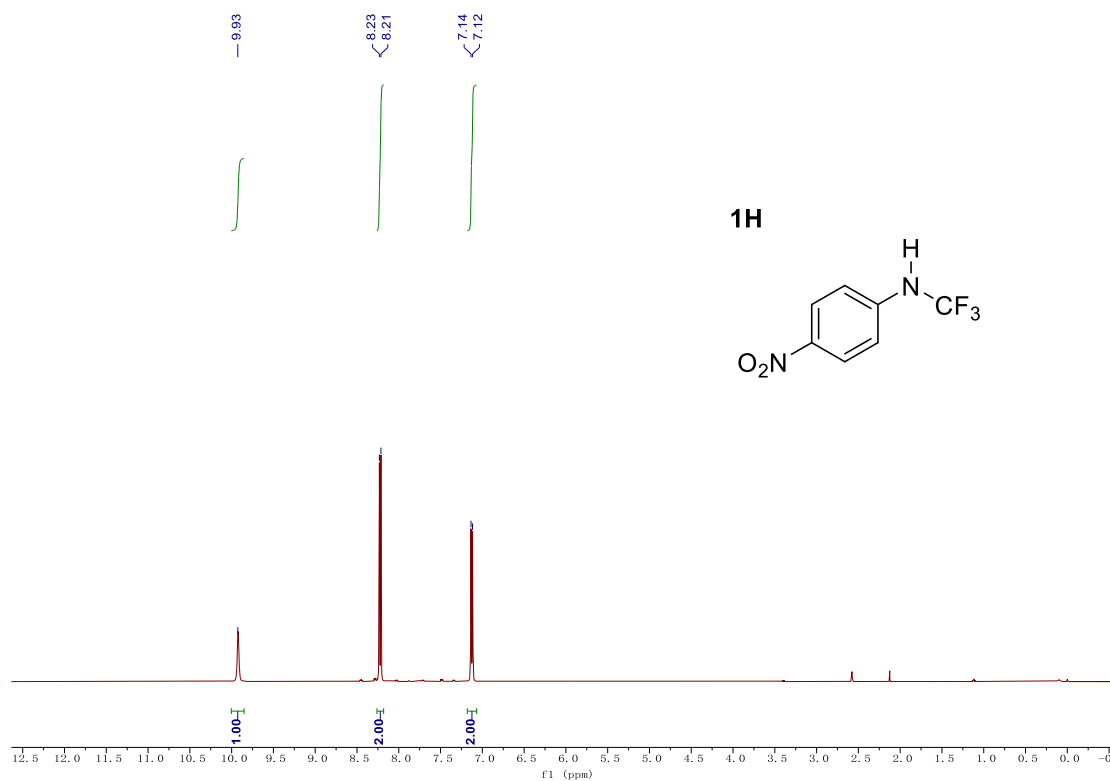

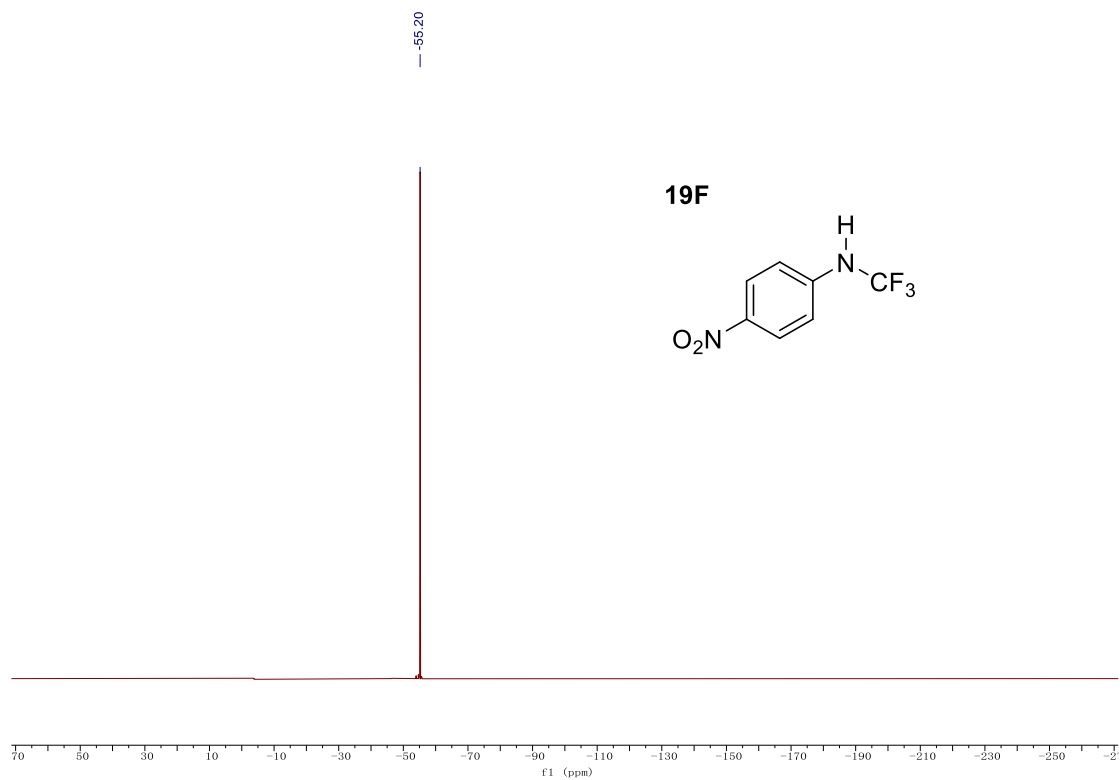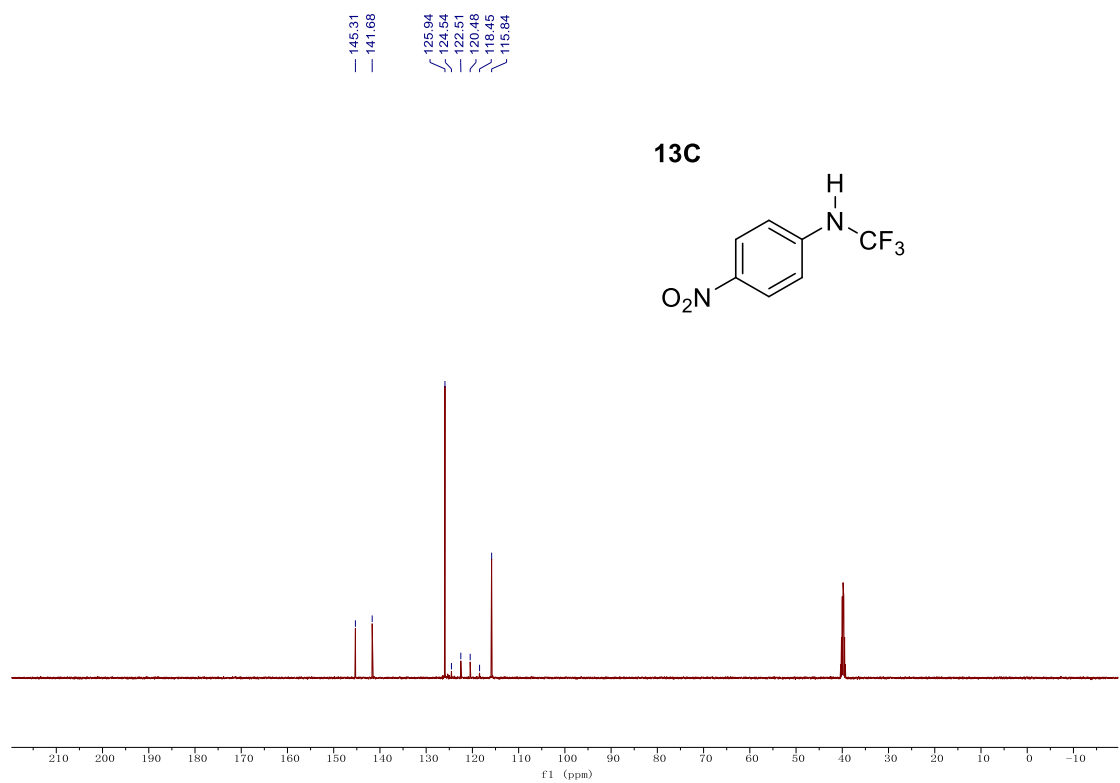

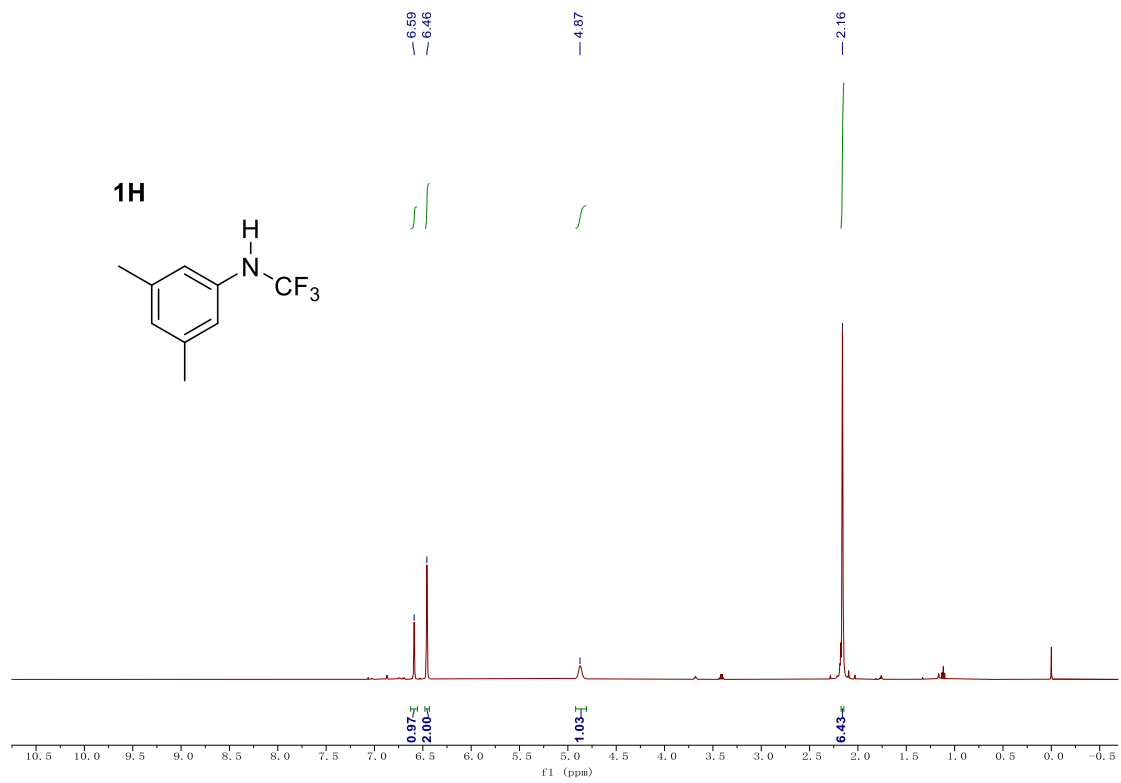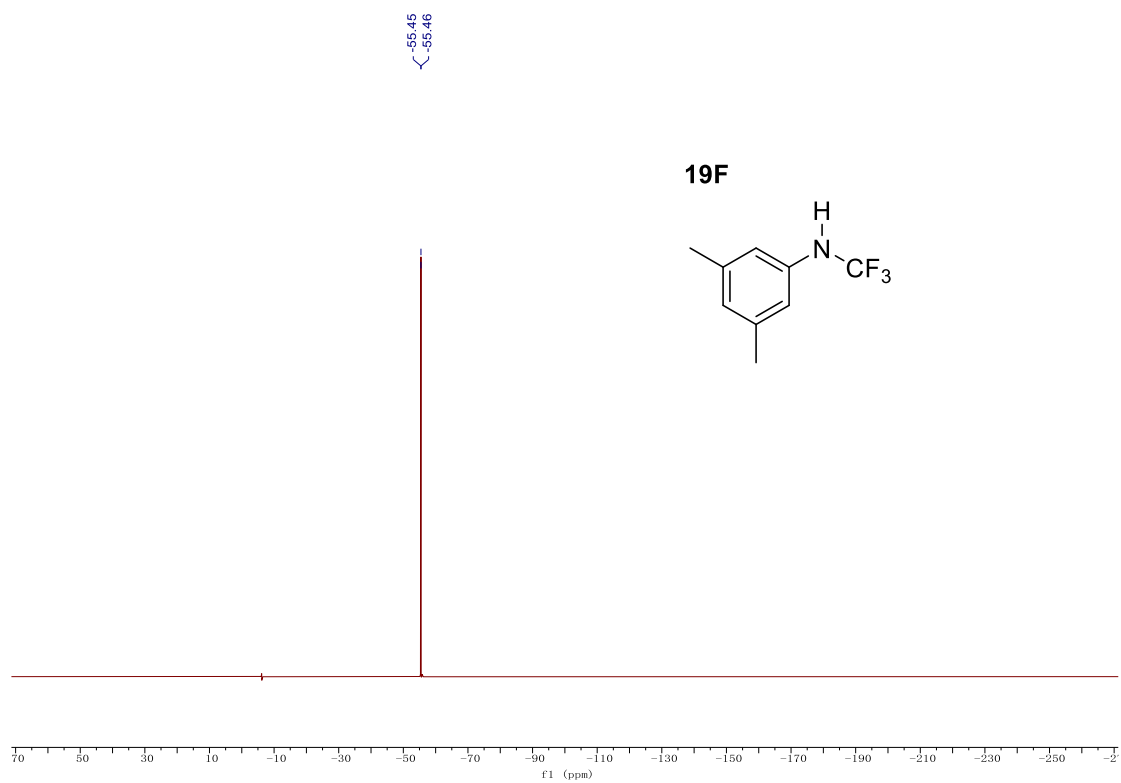

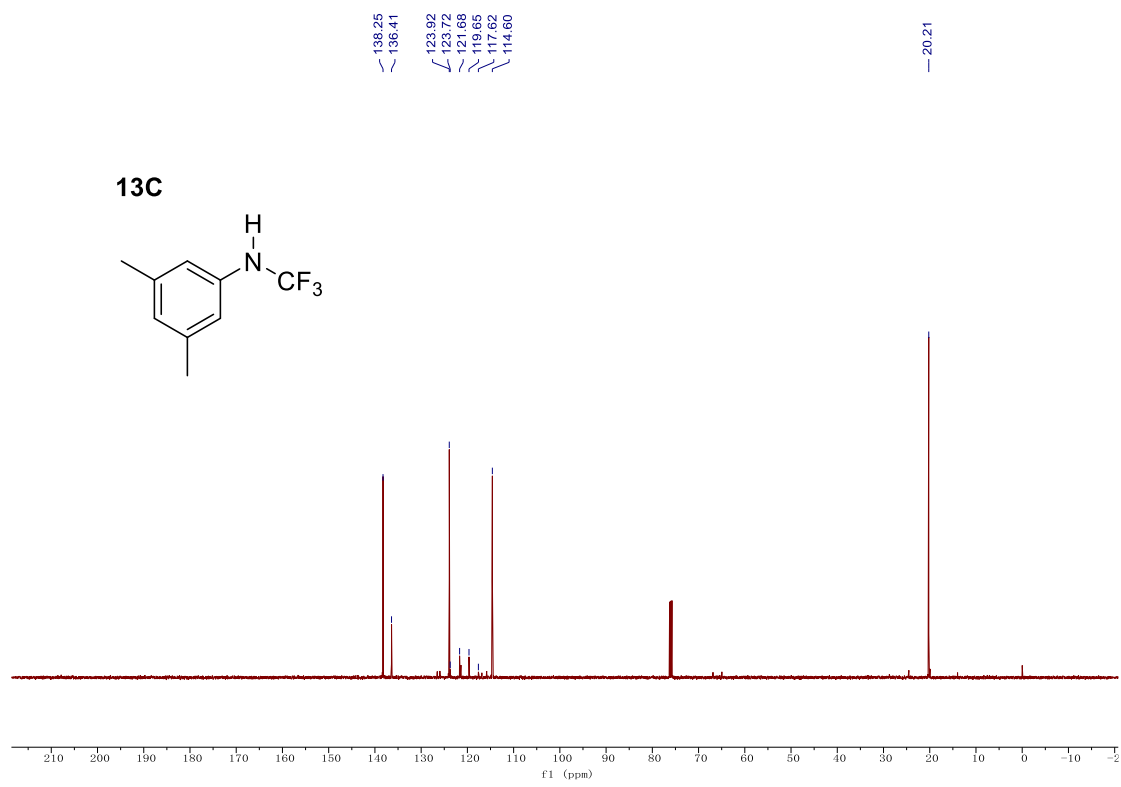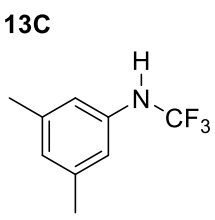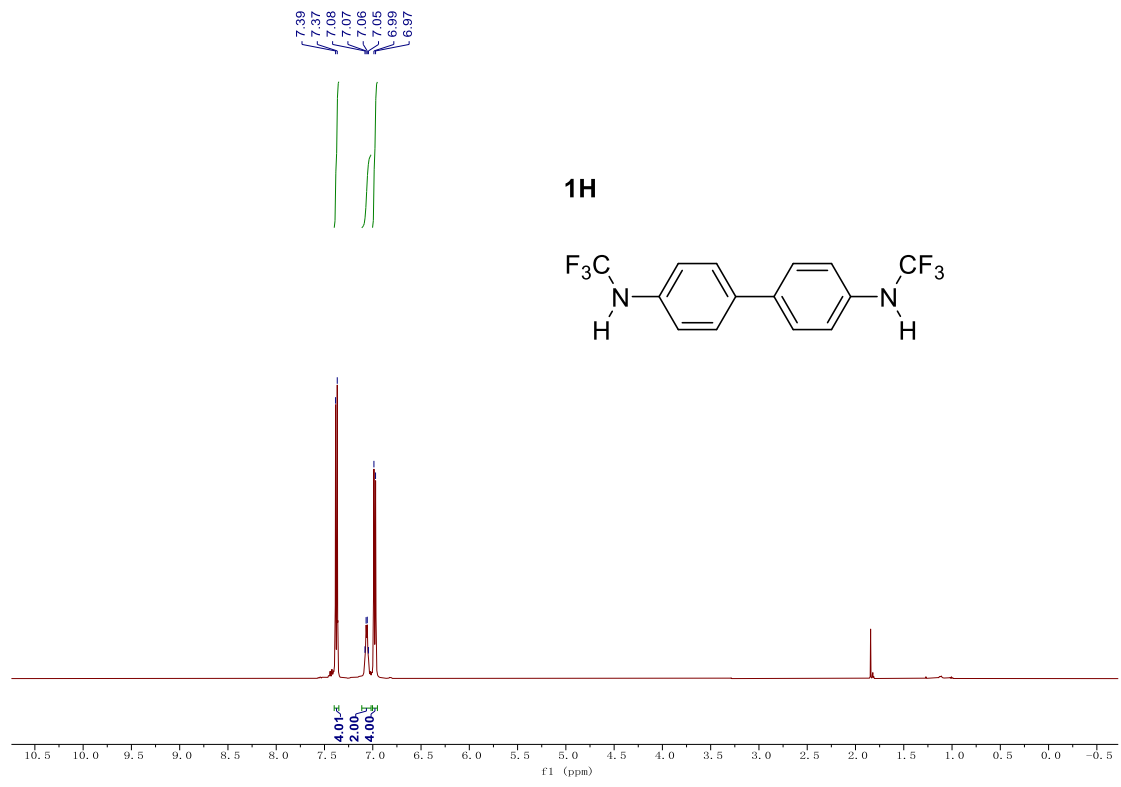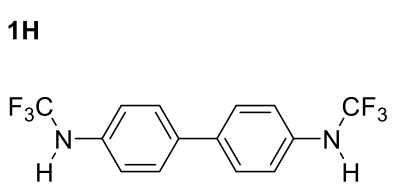

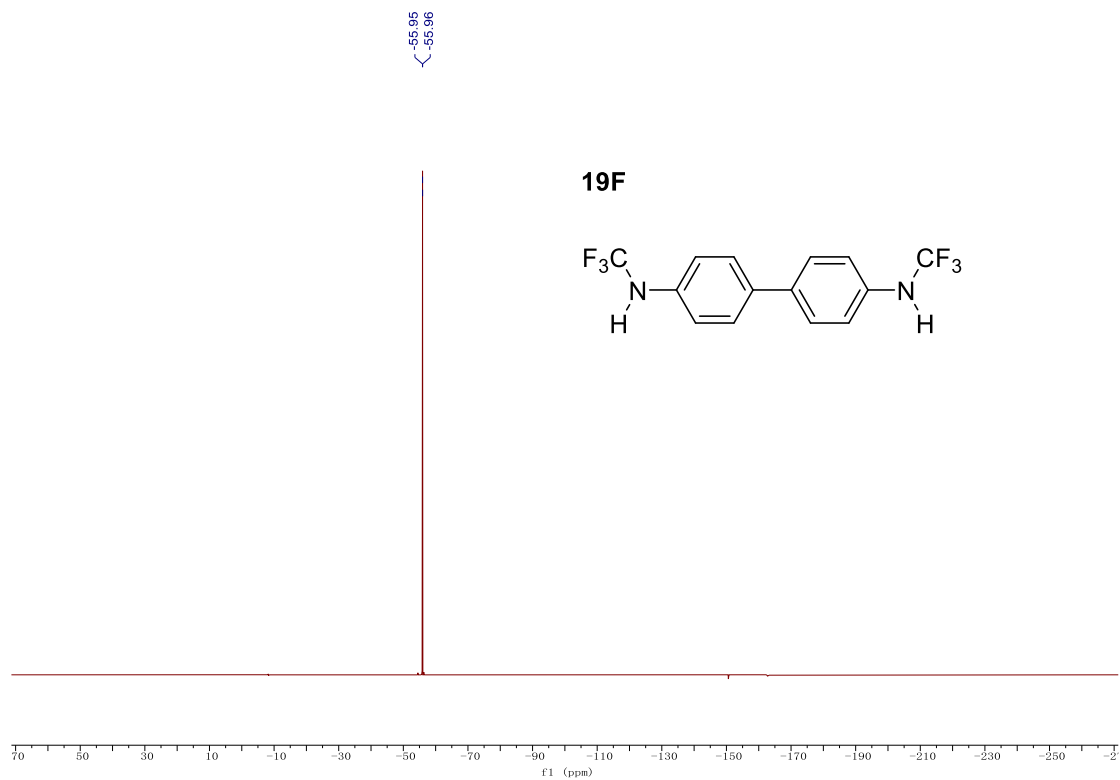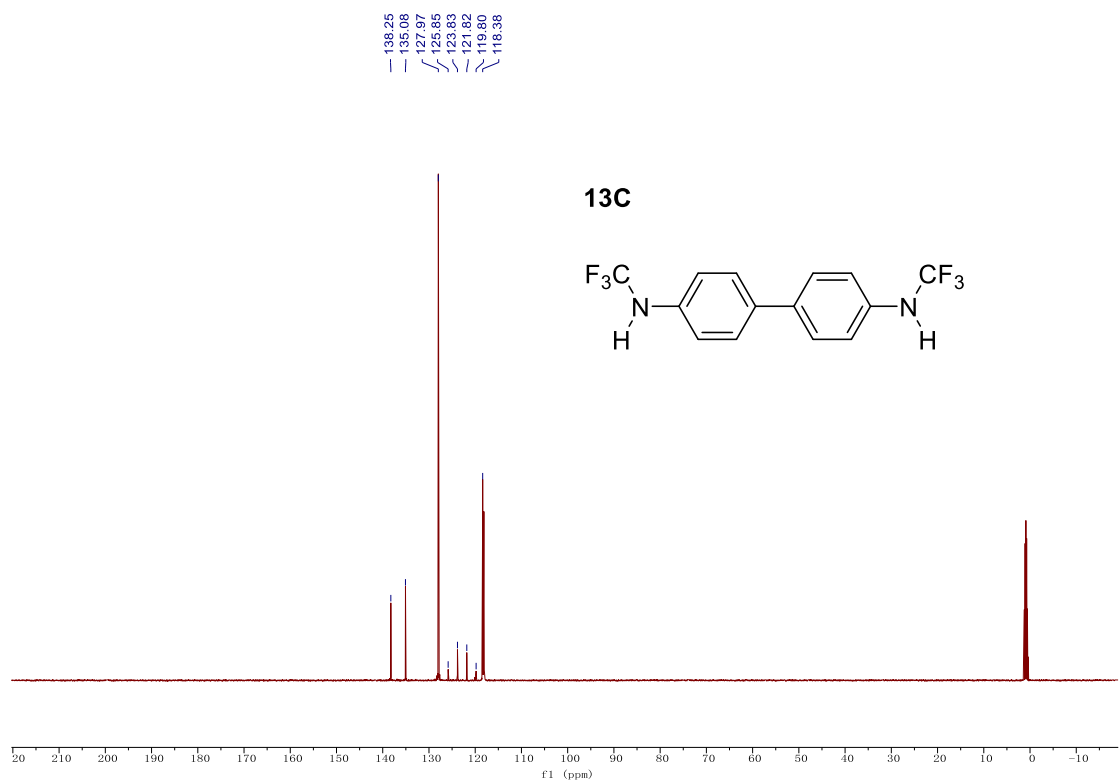

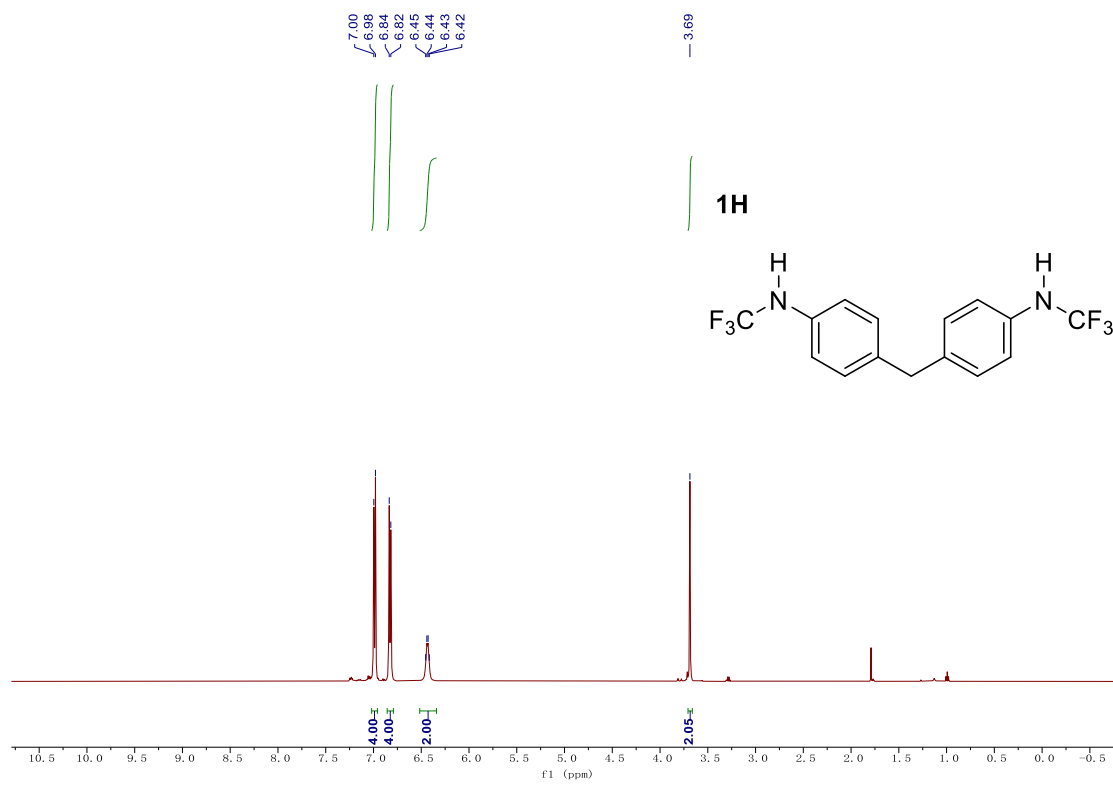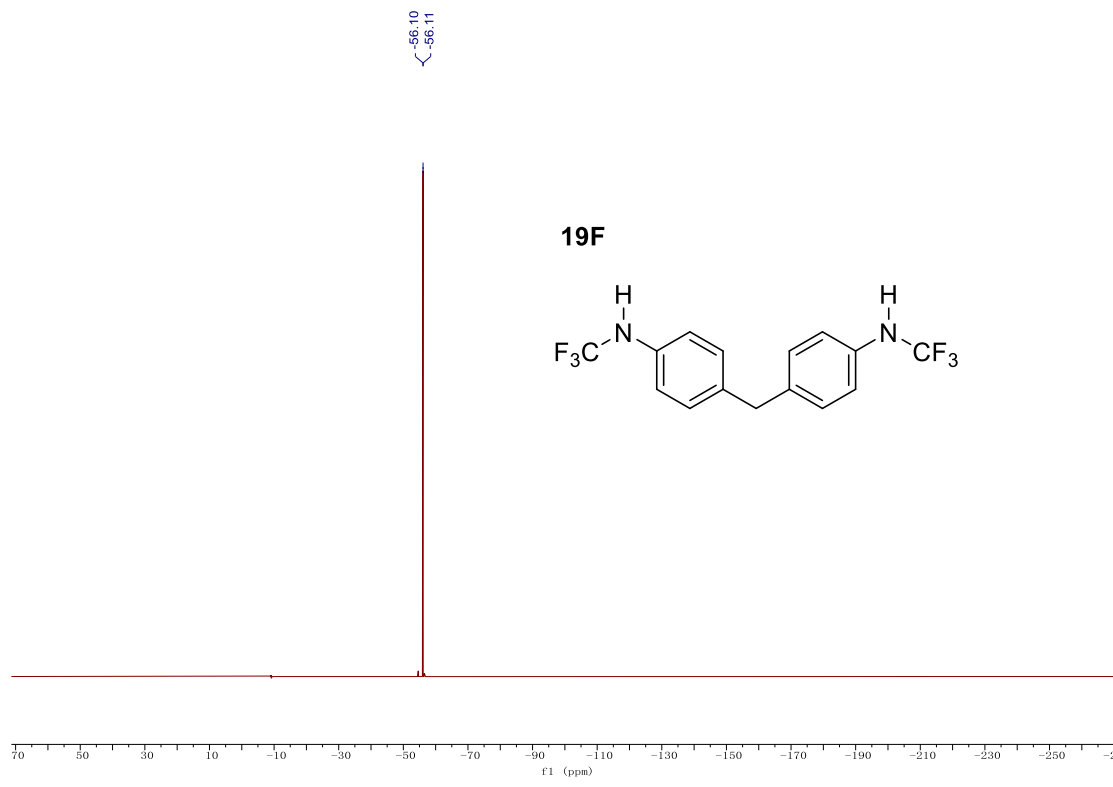

137.01  
136.97  
130.28  
125.94  
123.93  
121.91  
119.90  
118.69

40.44

### 13C

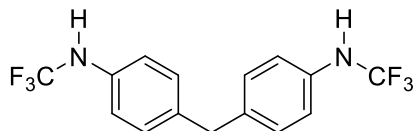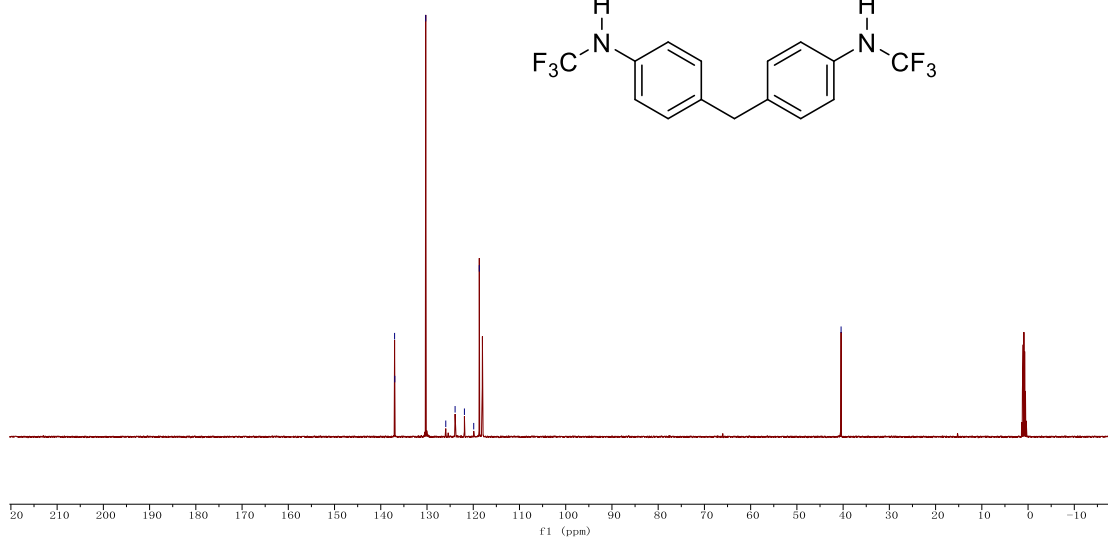

7.73  
7.71  
7.24  
7.23  
7.22  
7.21  
6.97

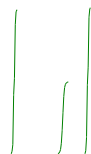

### 1H

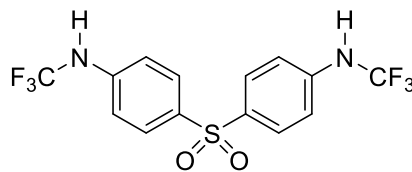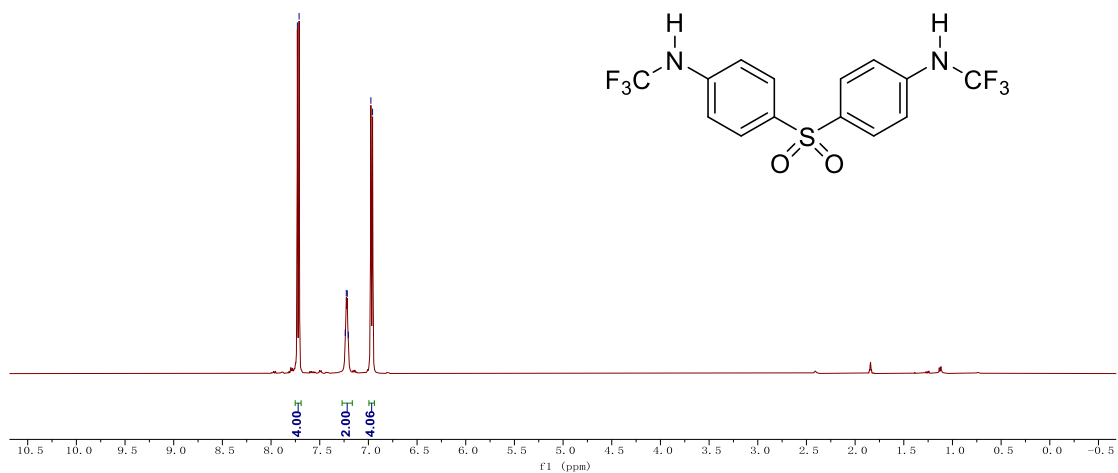



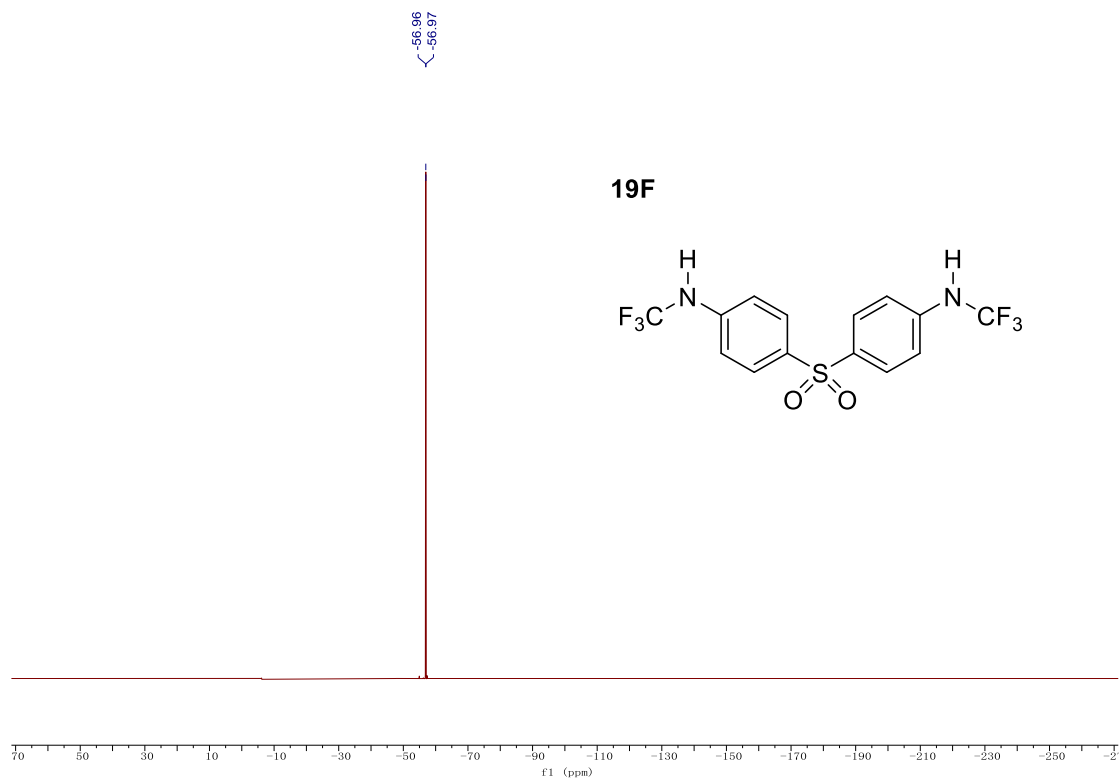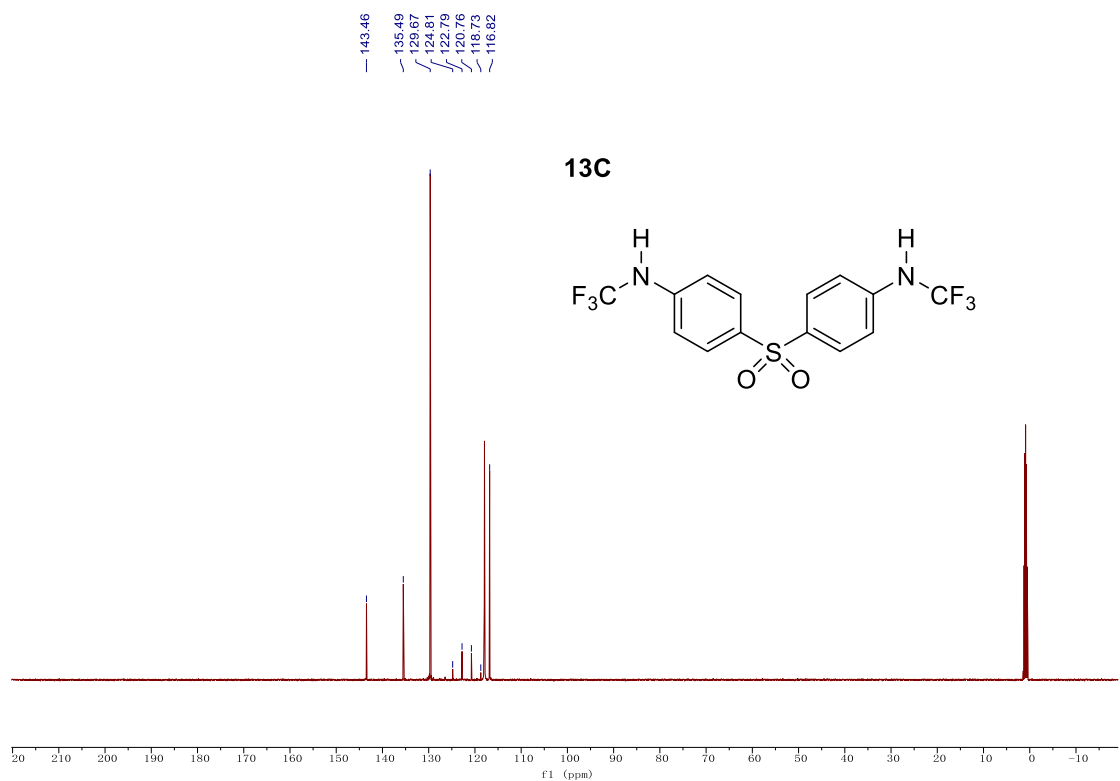

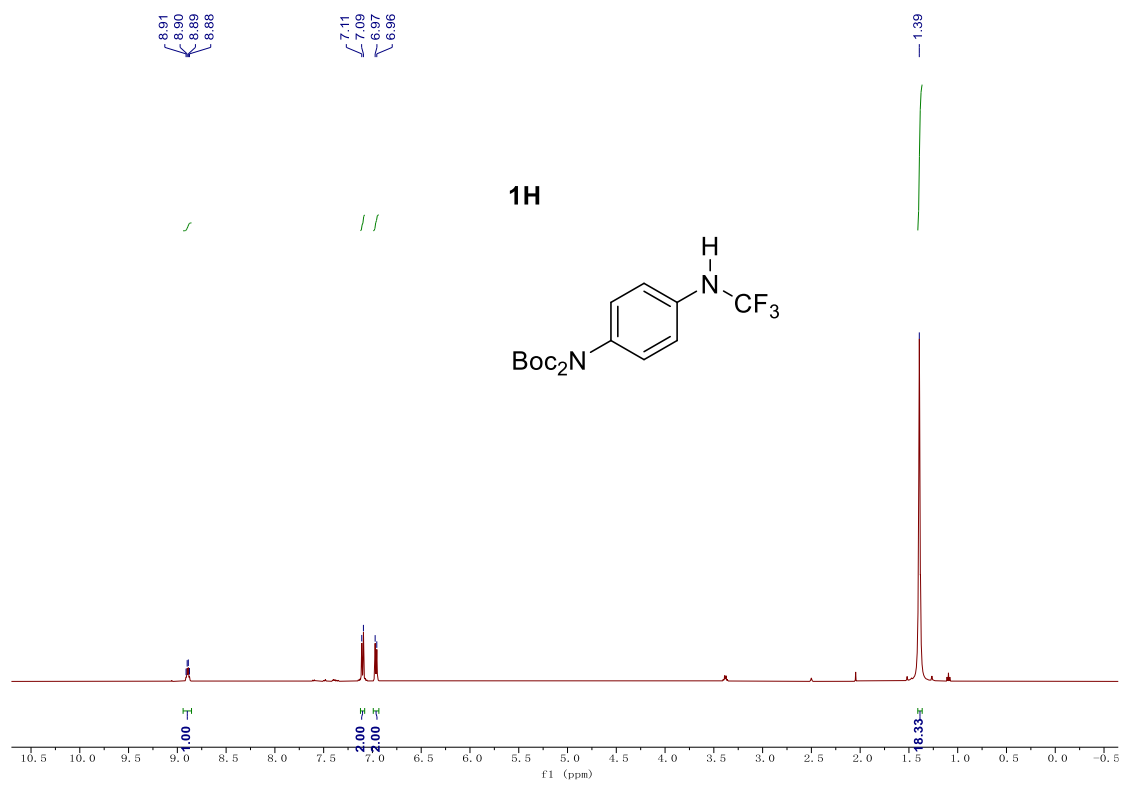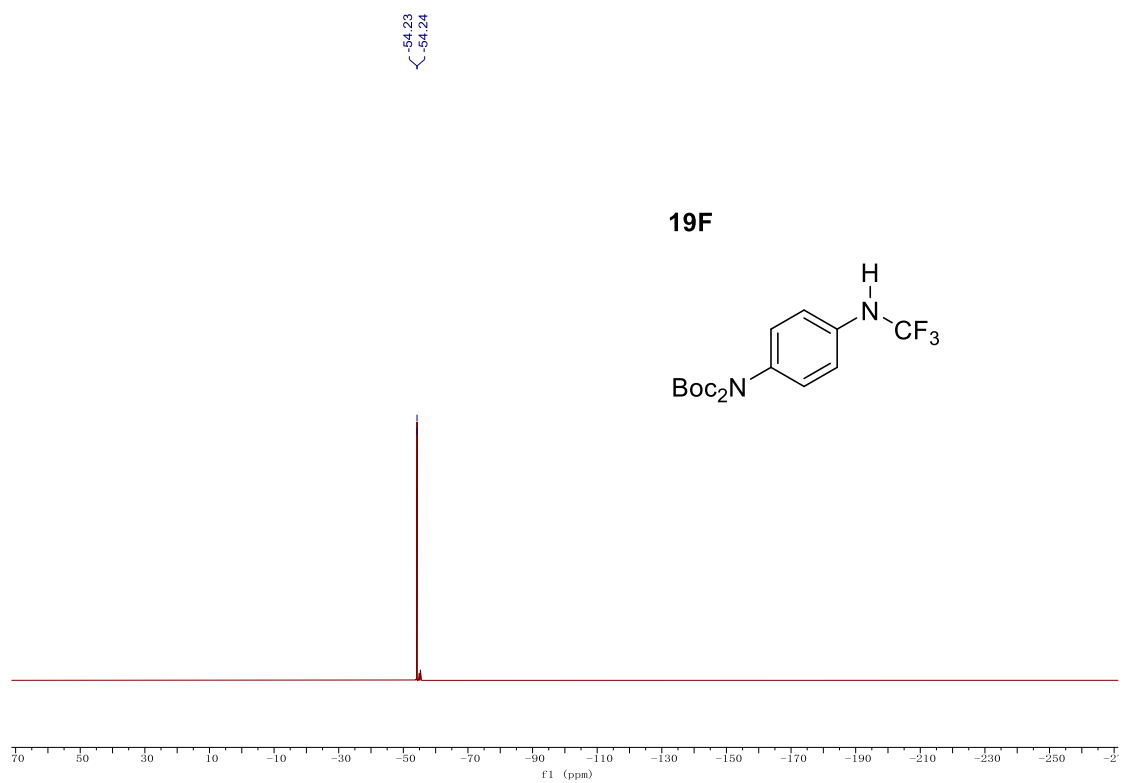

13C

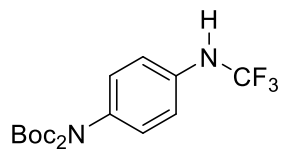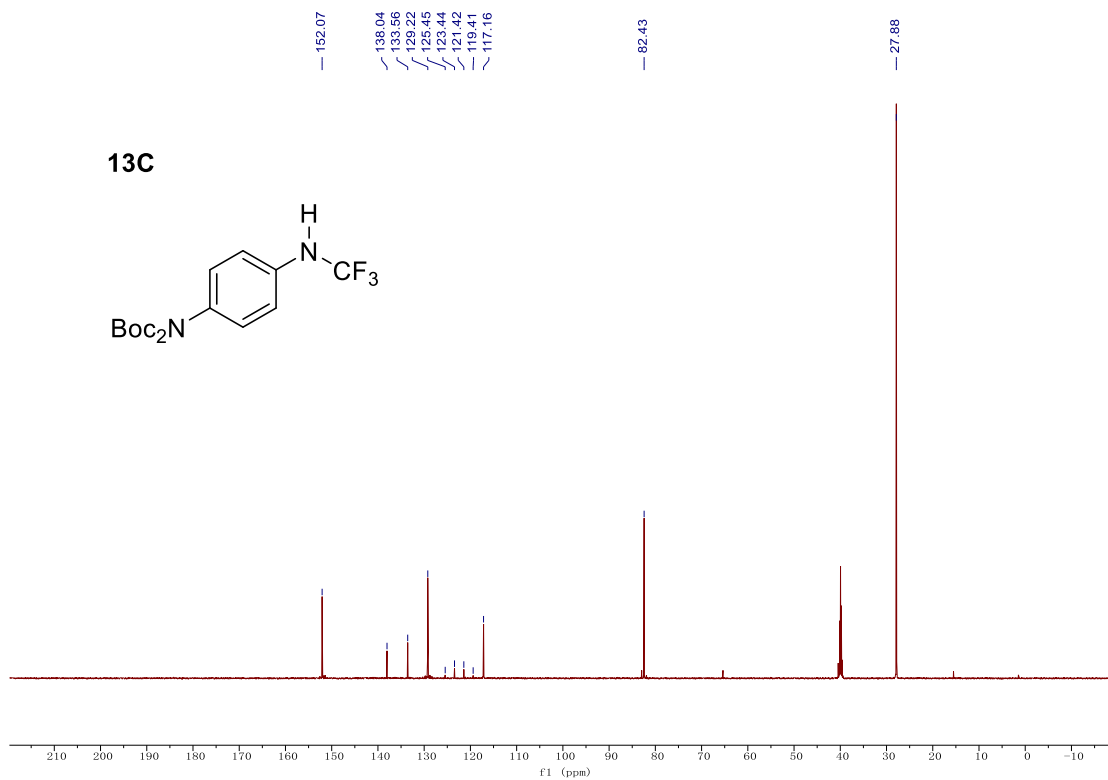

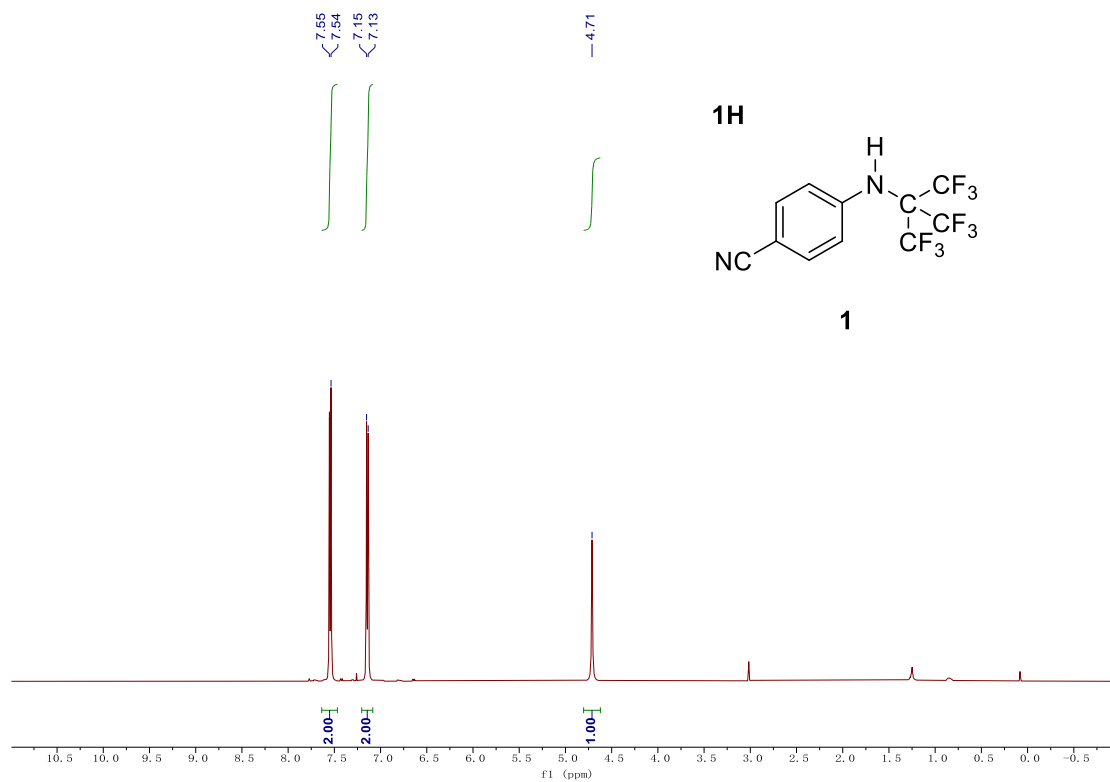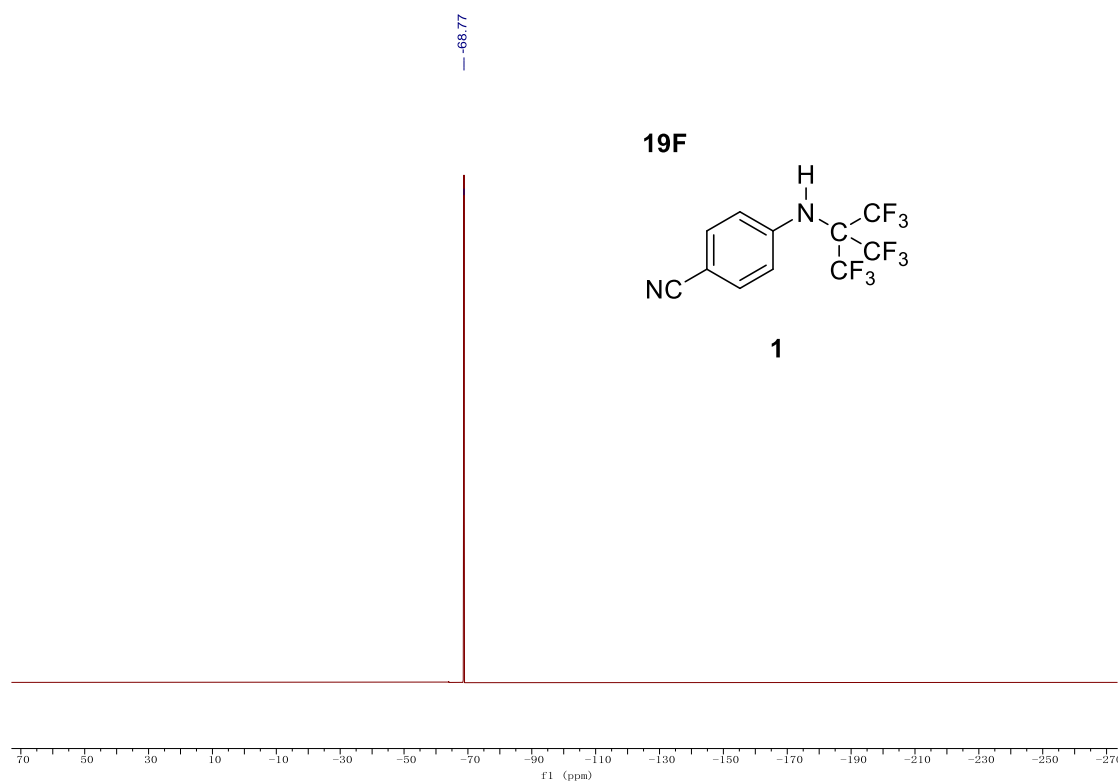

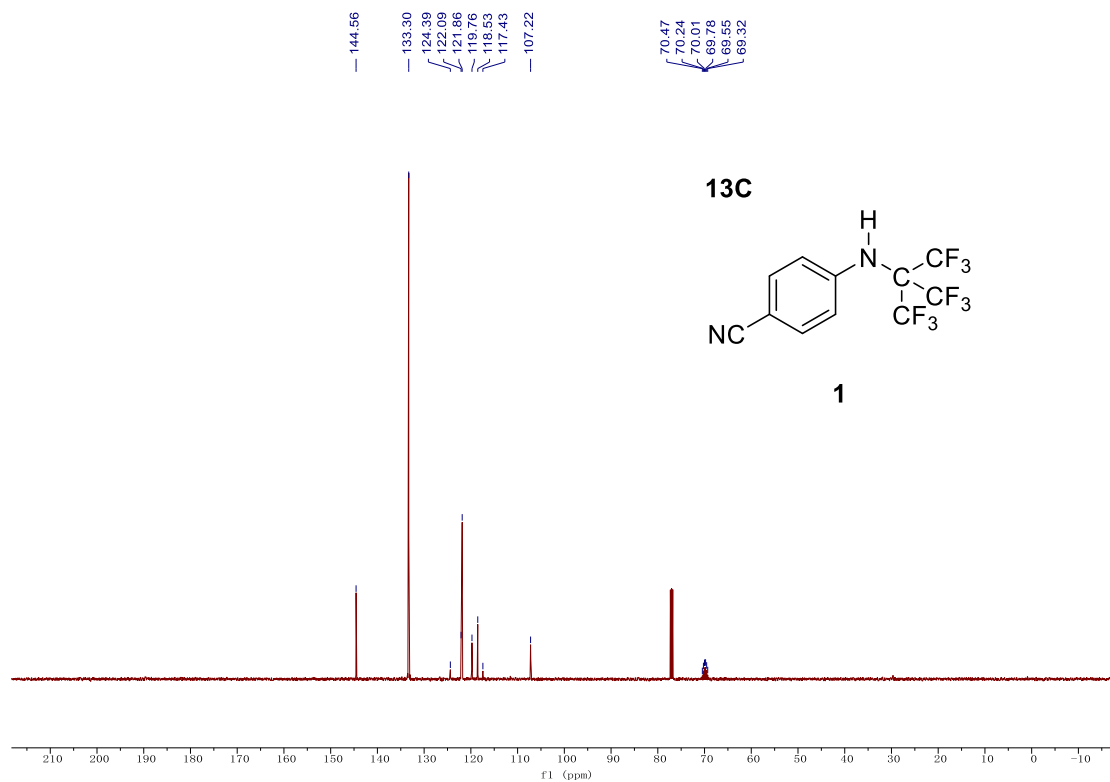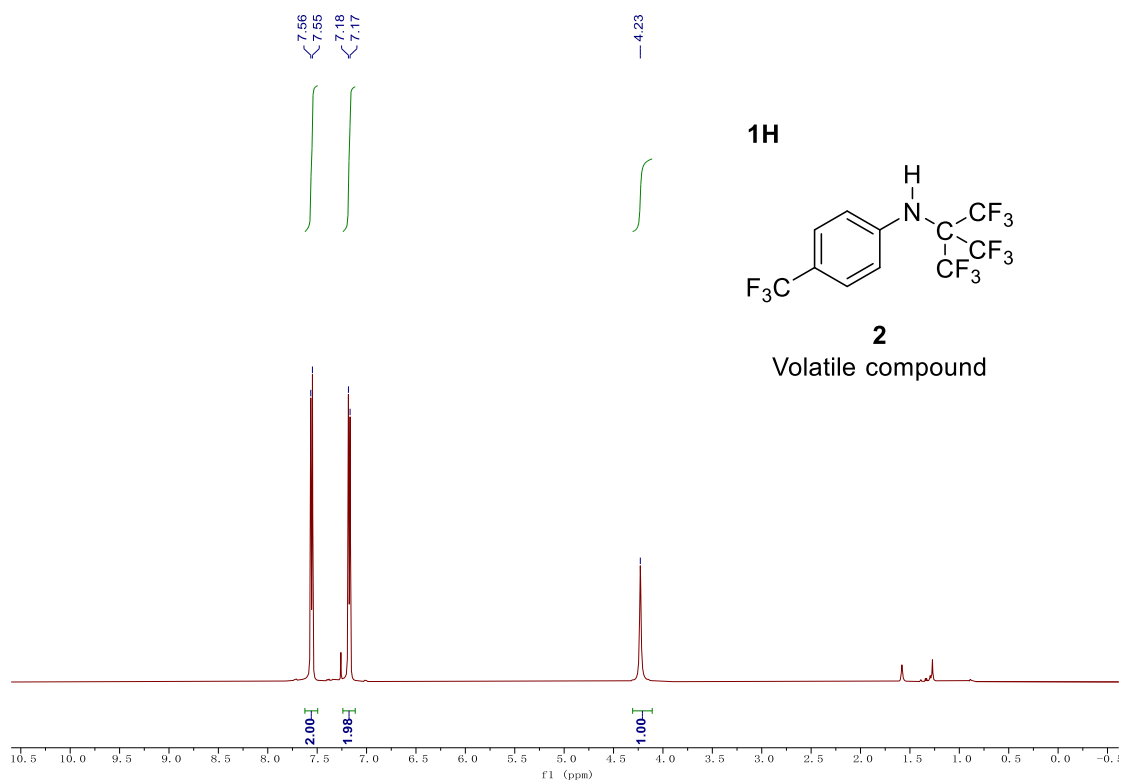

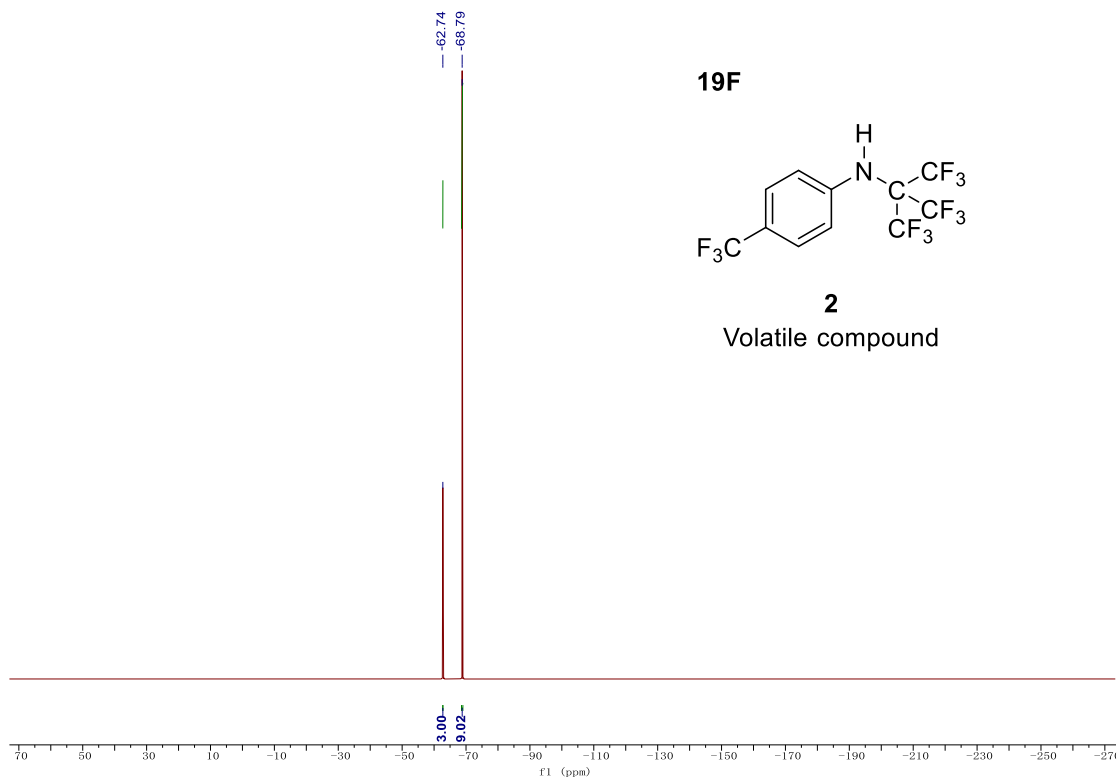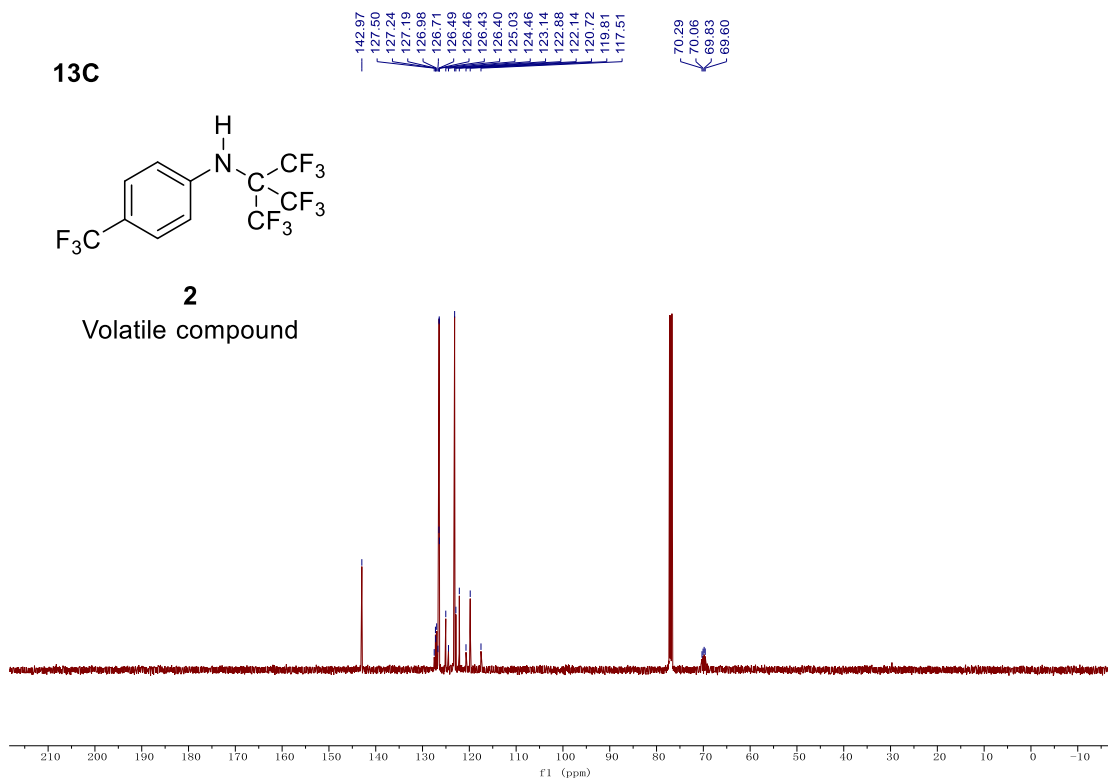

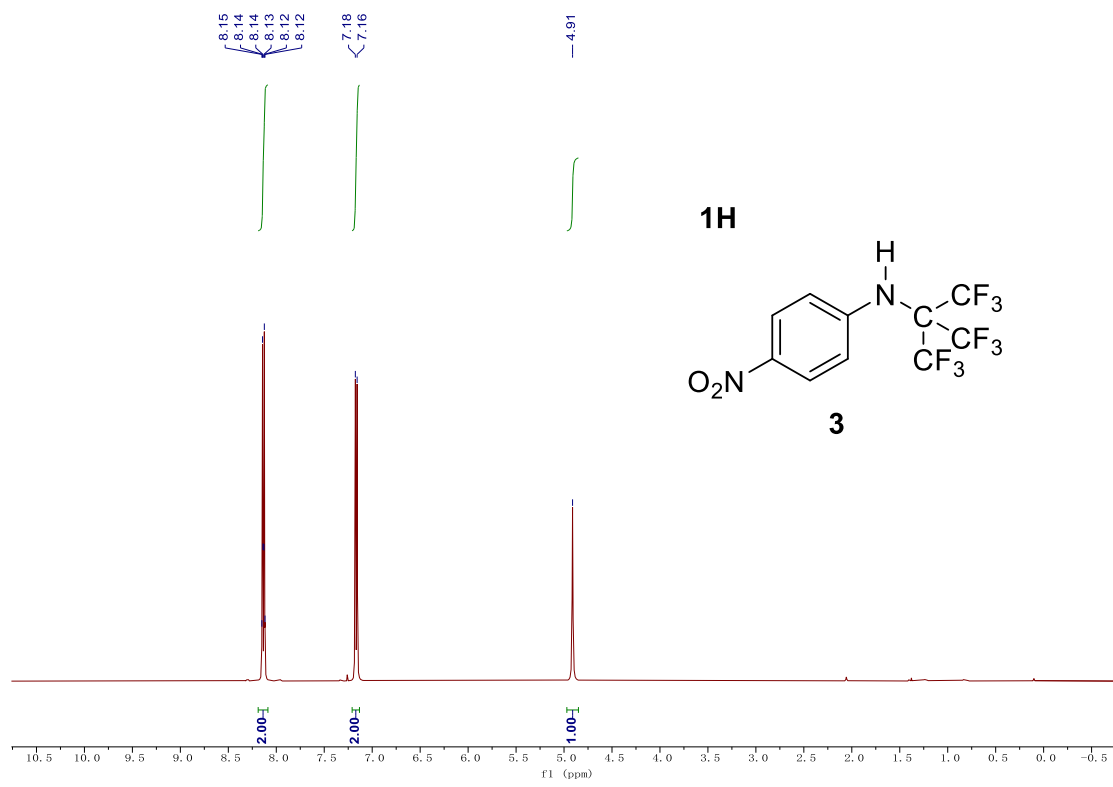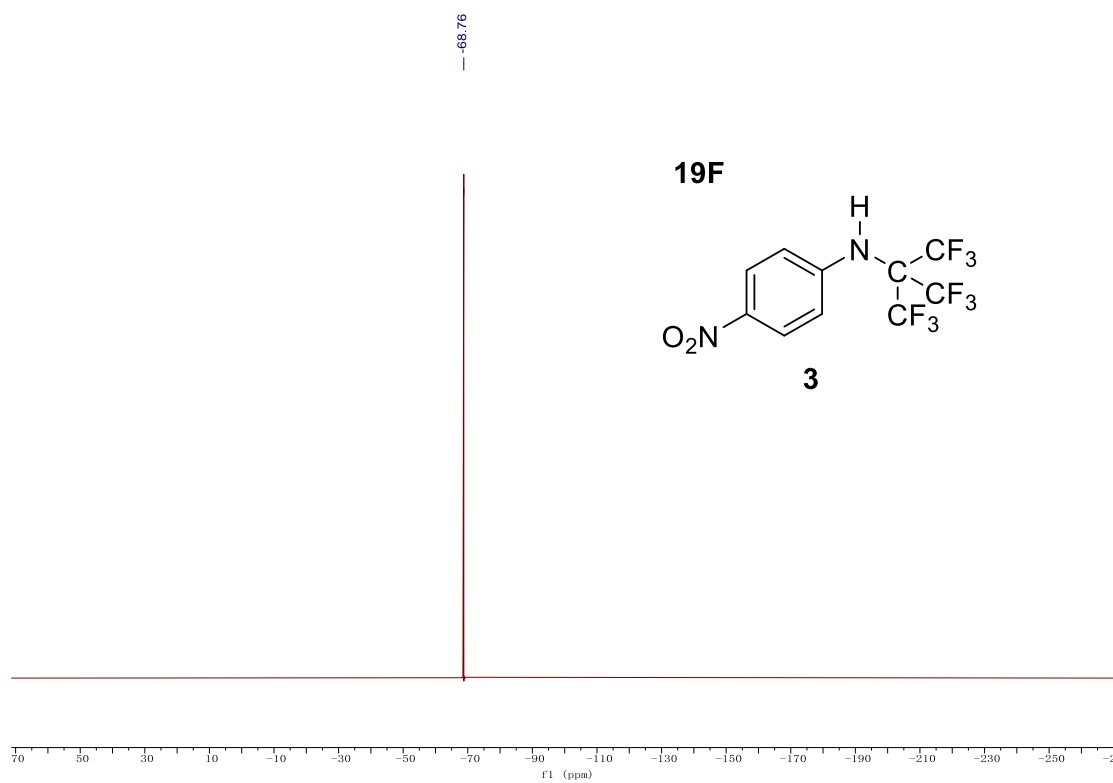

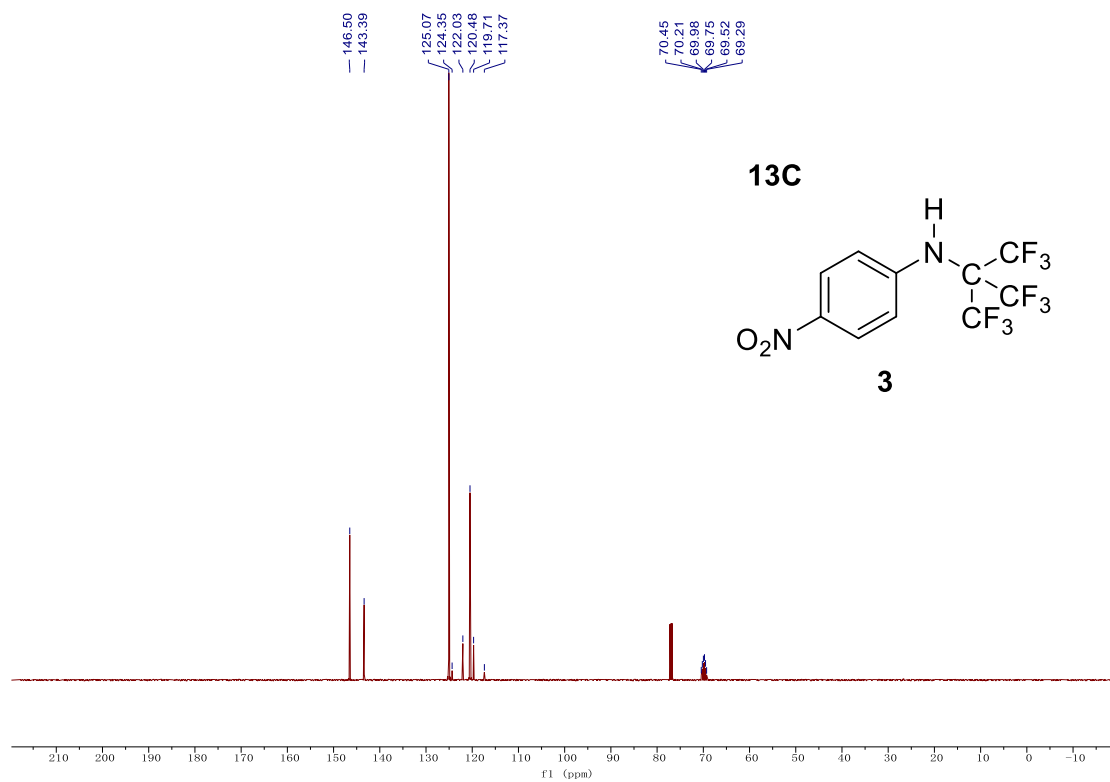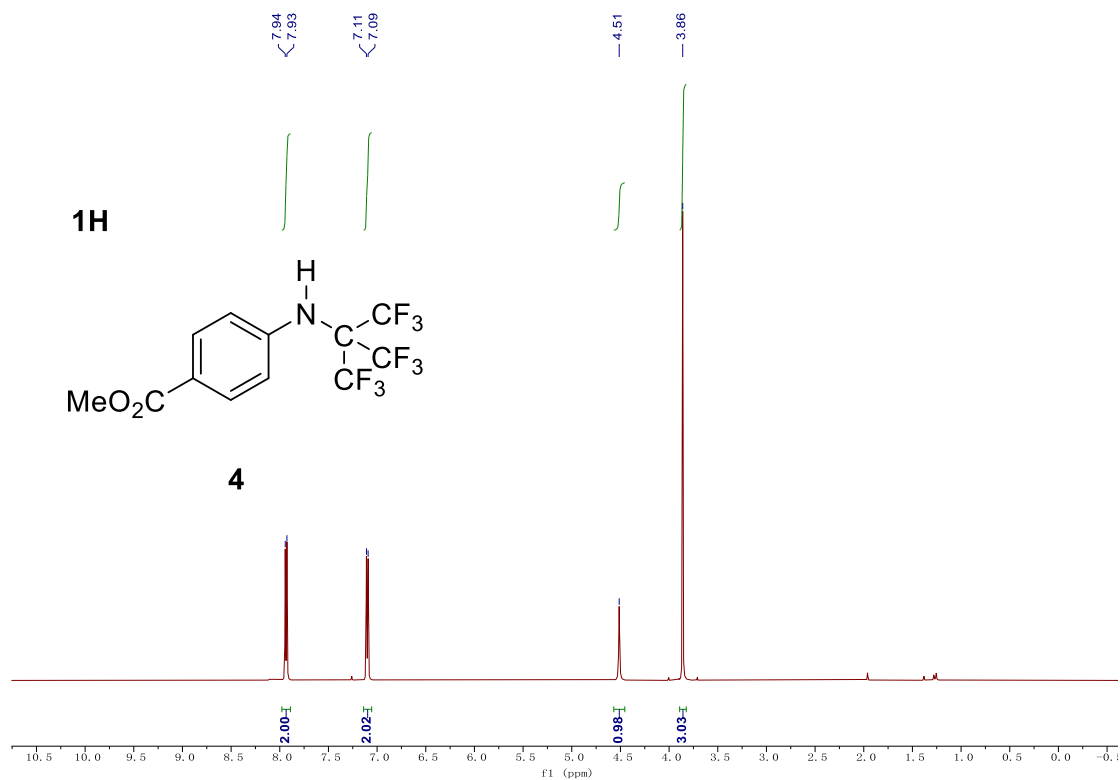



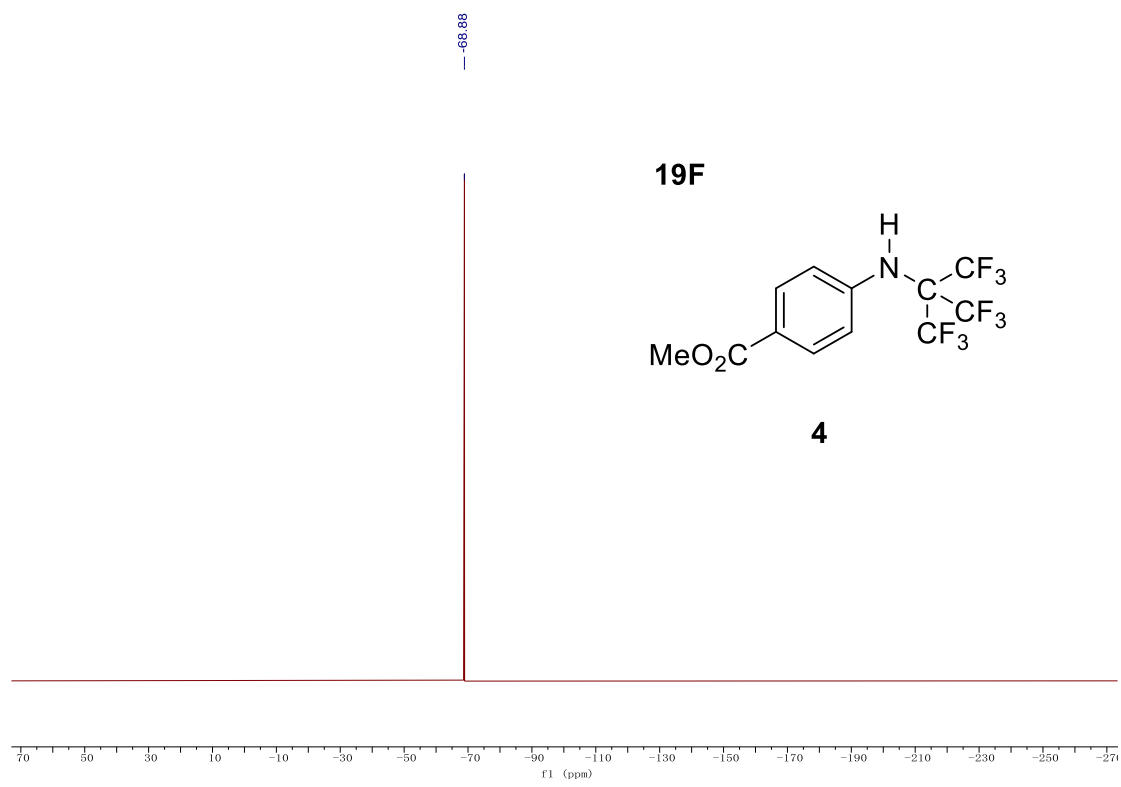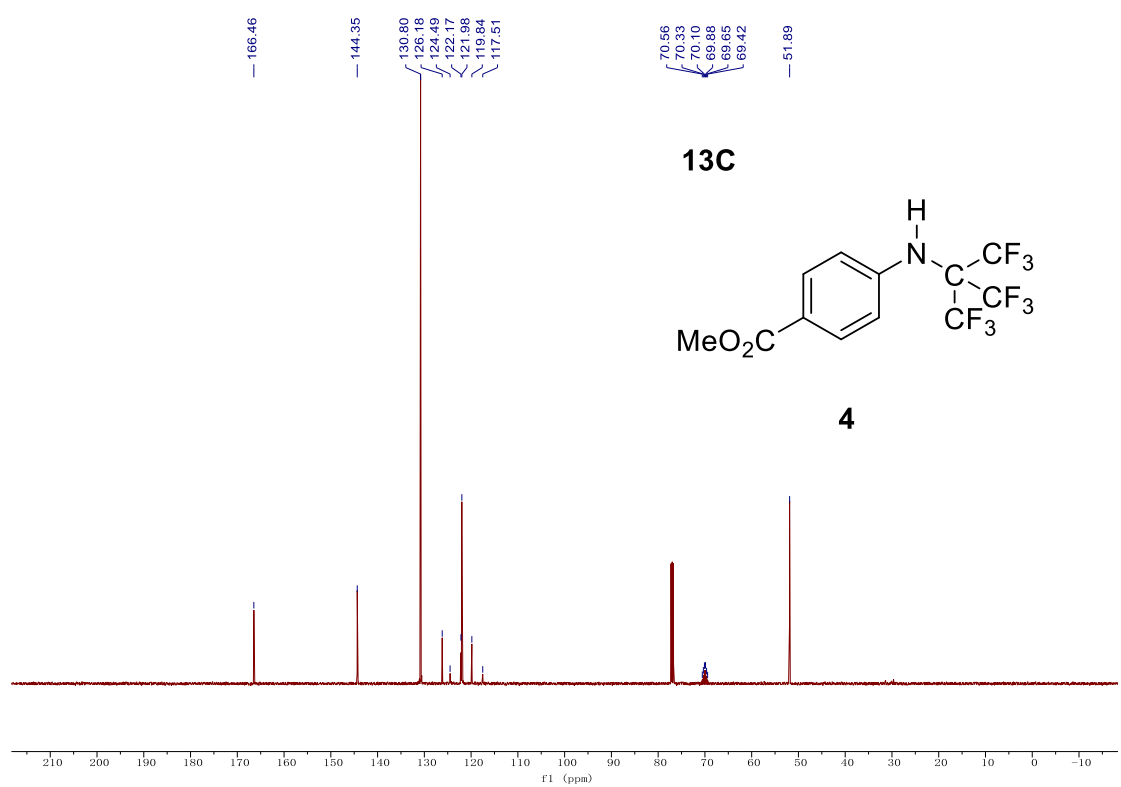

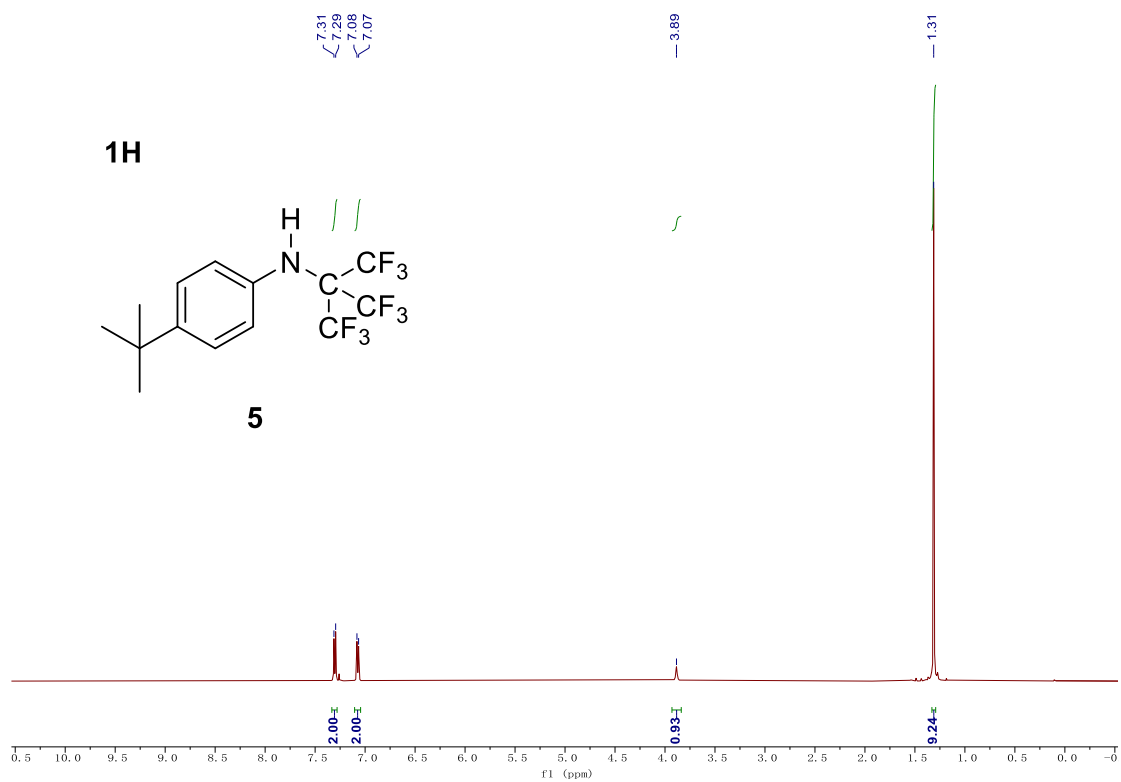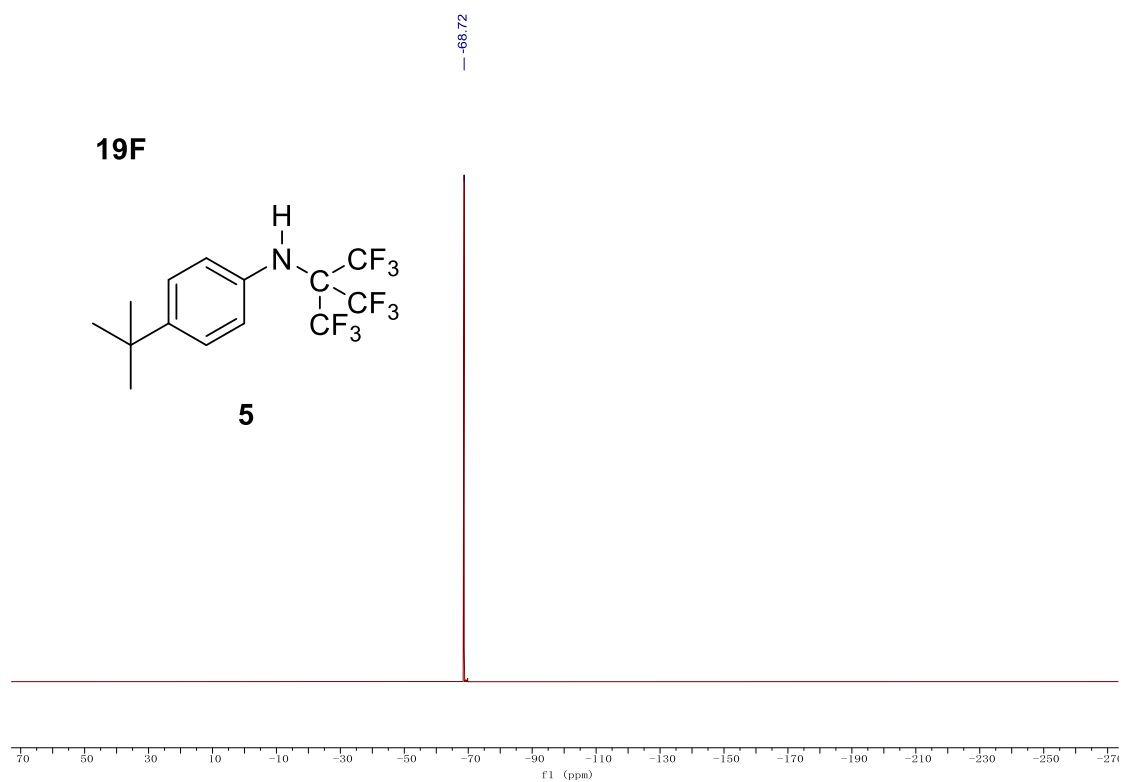

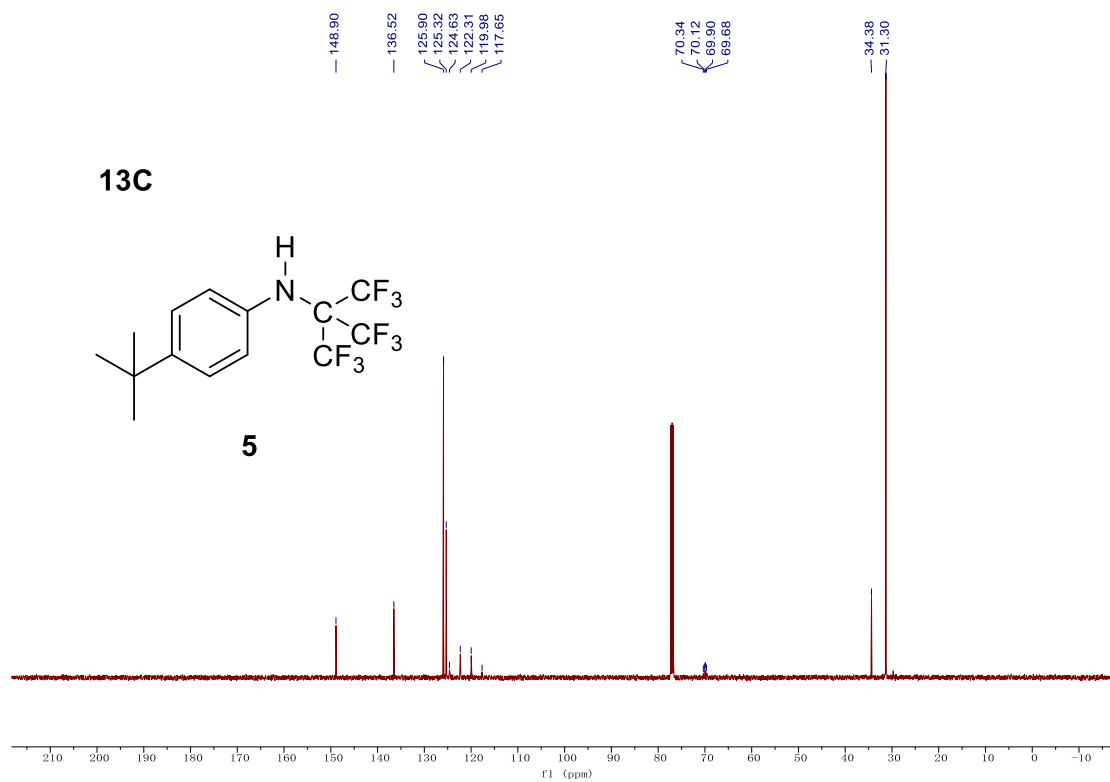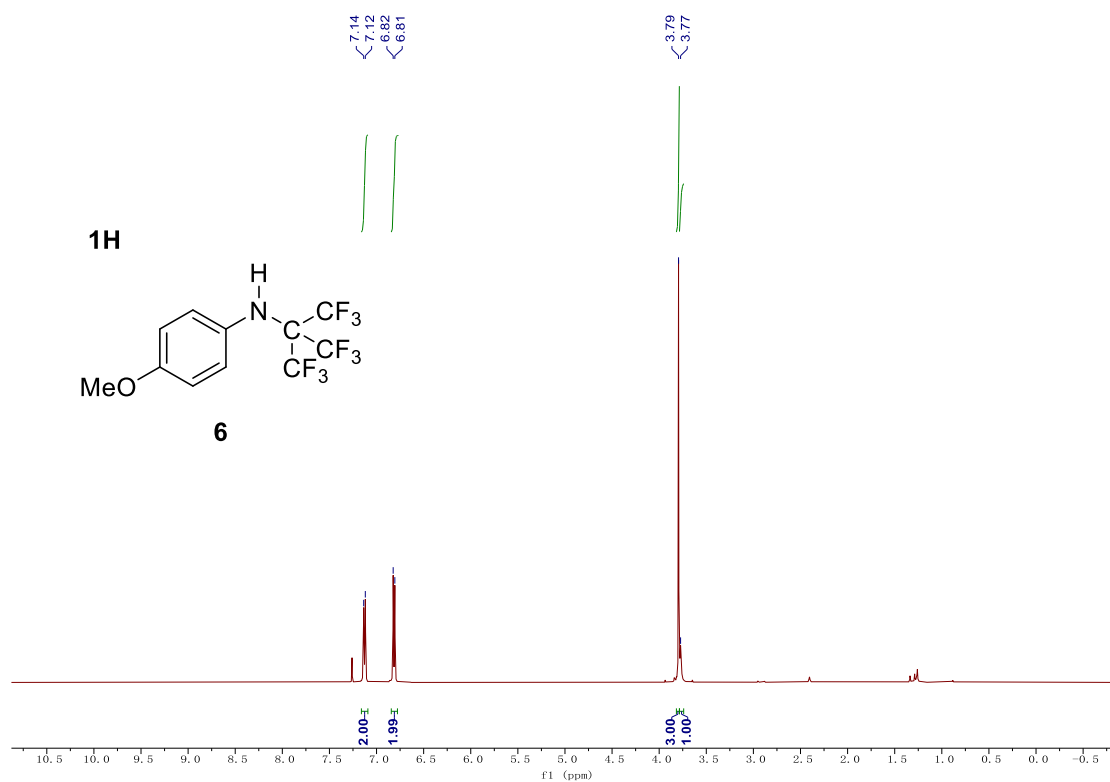

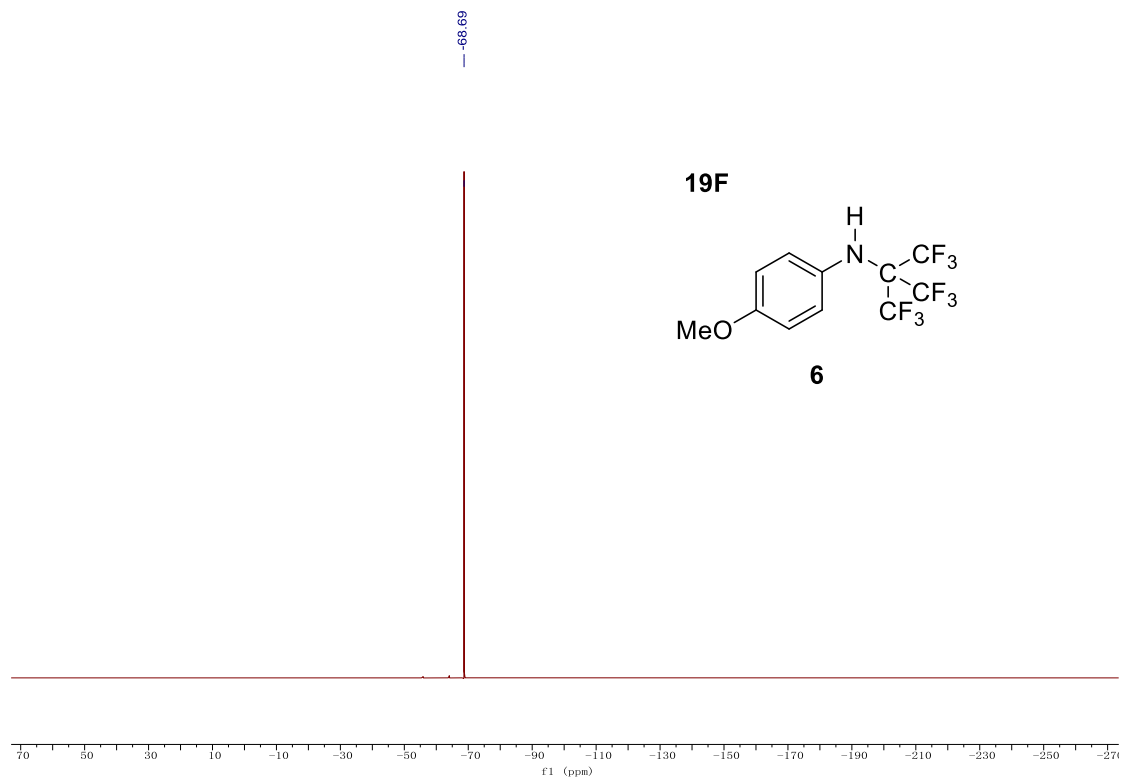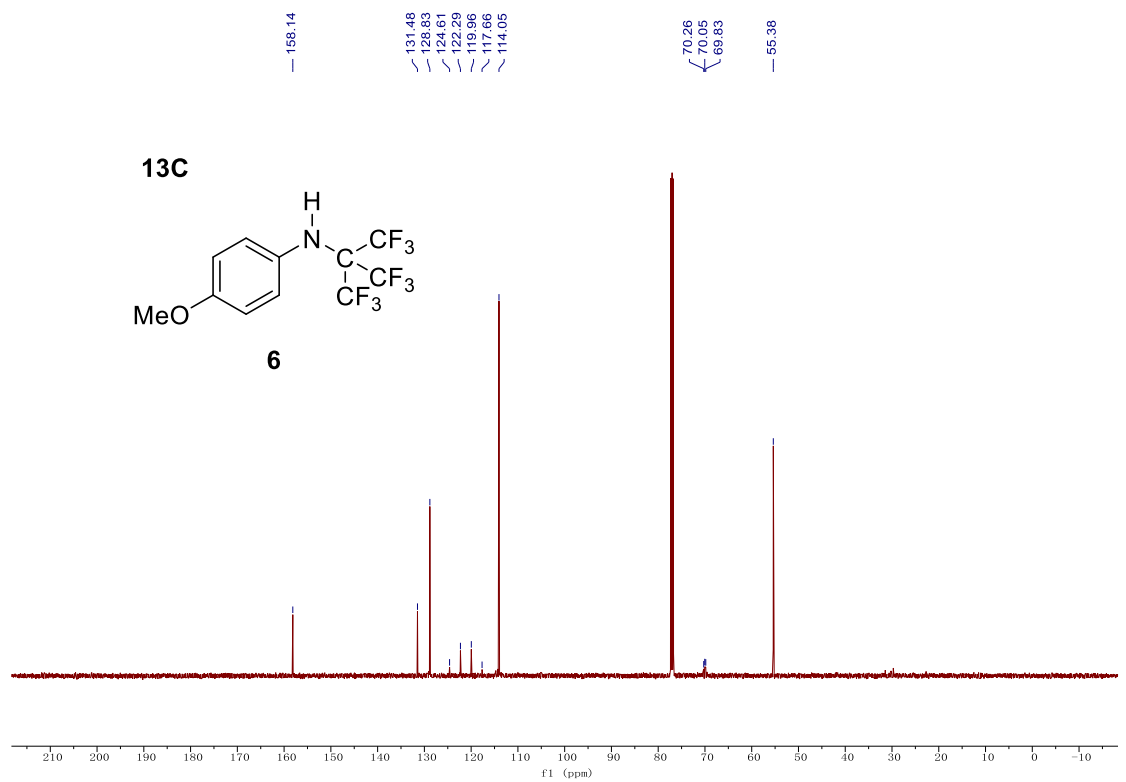

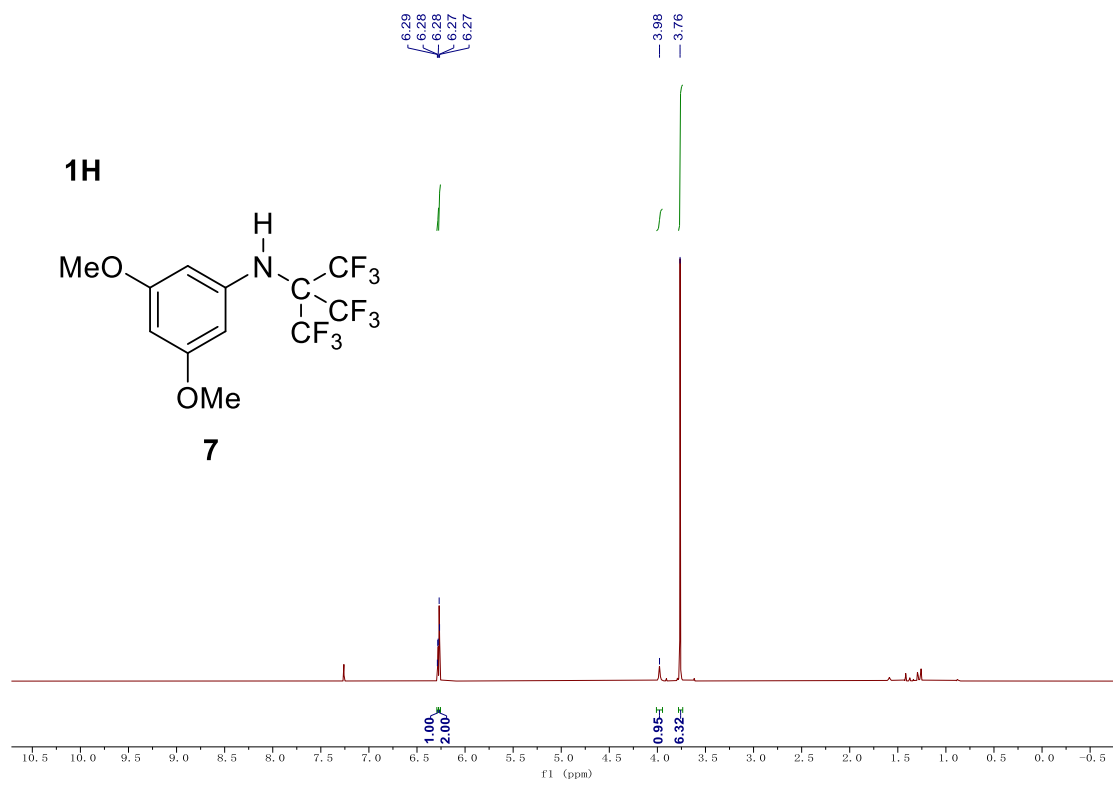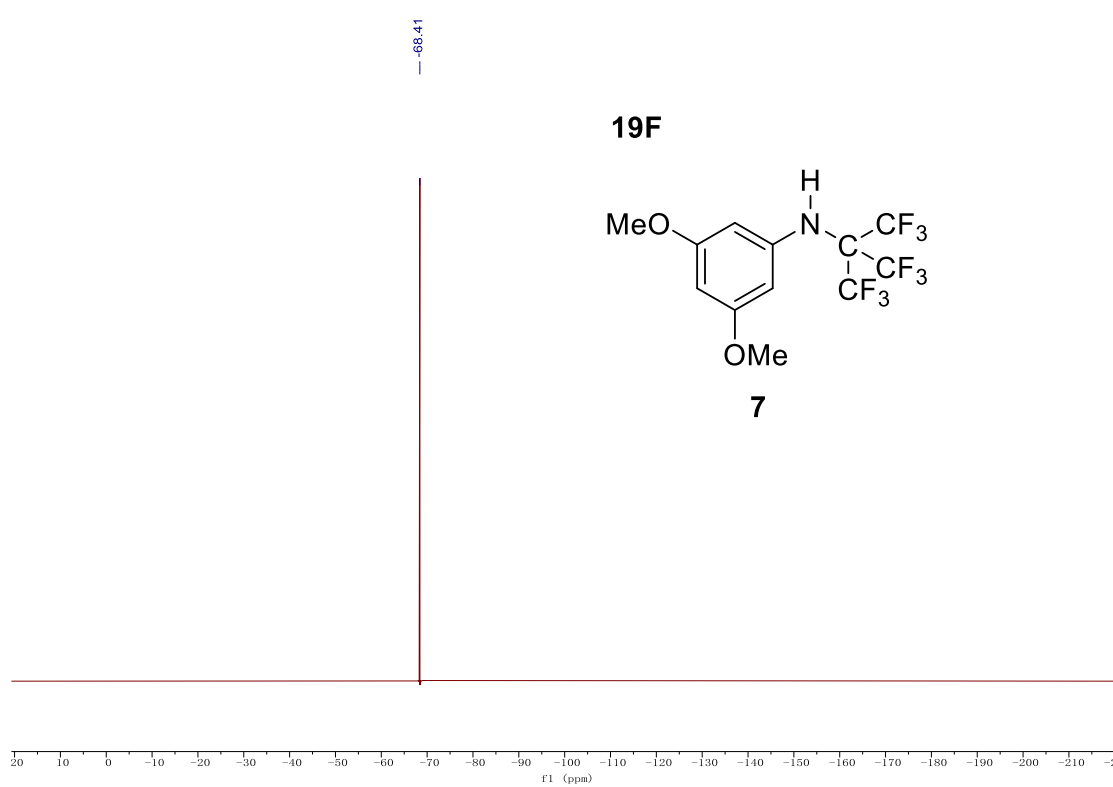

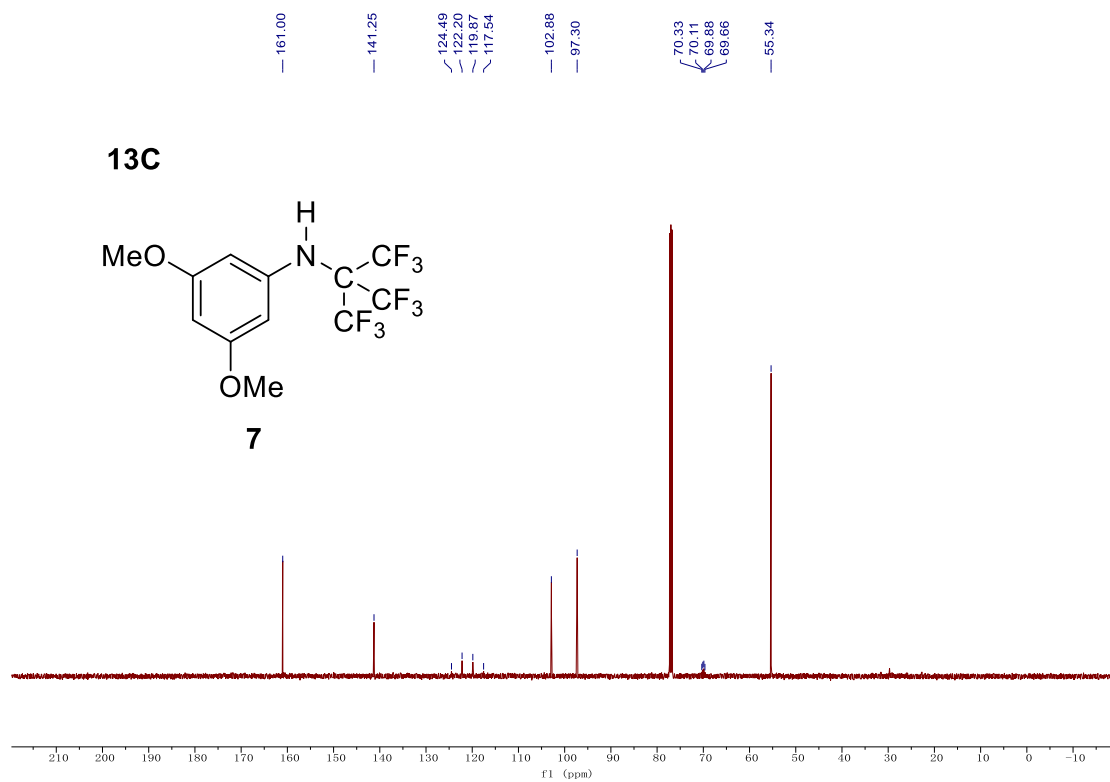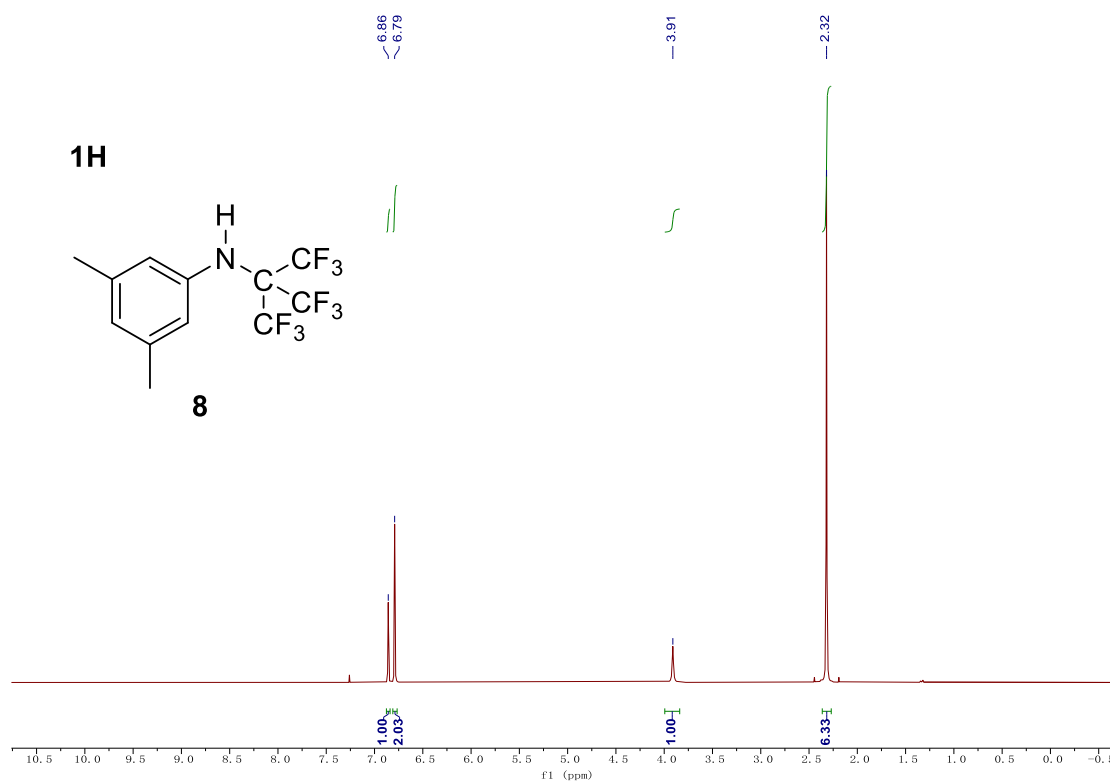

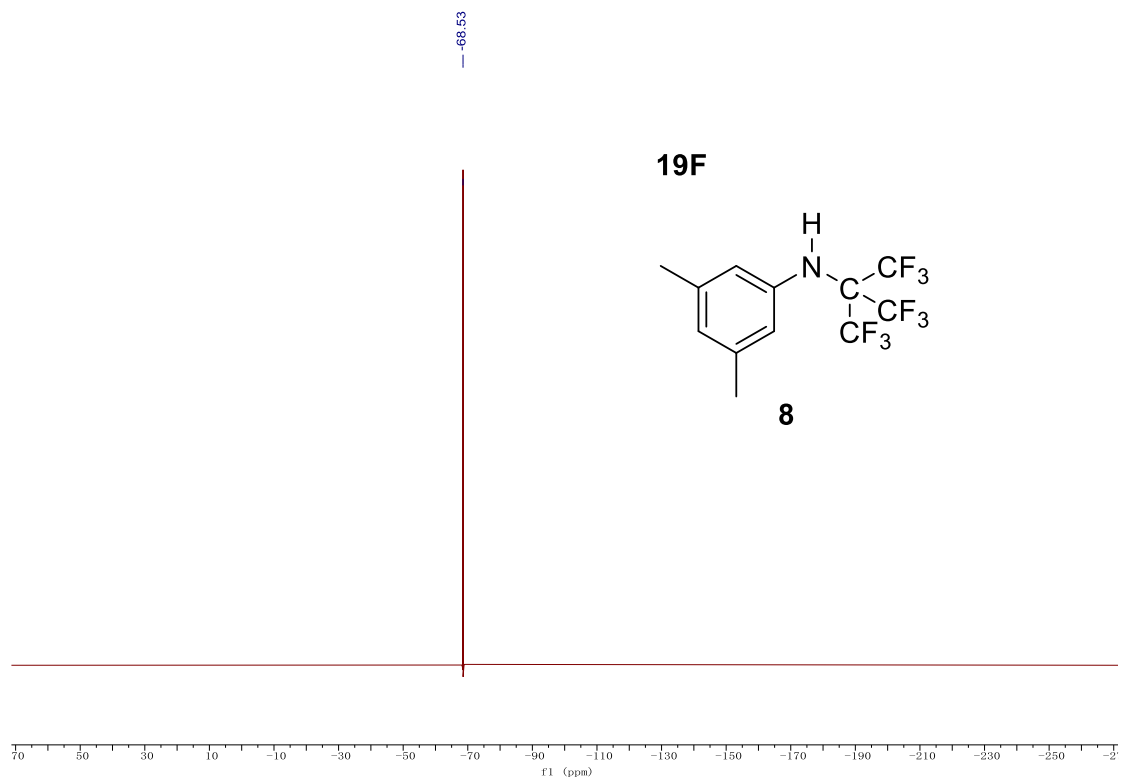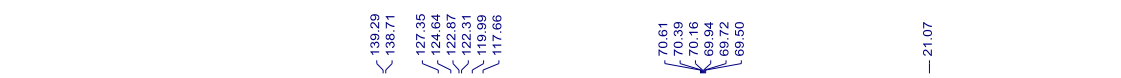

**13C**

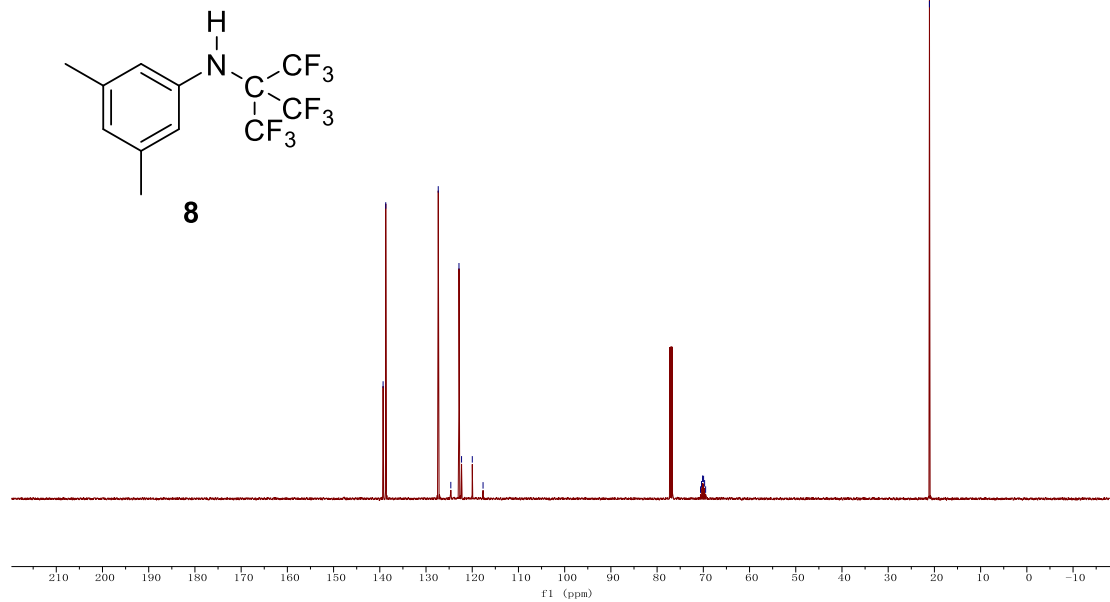

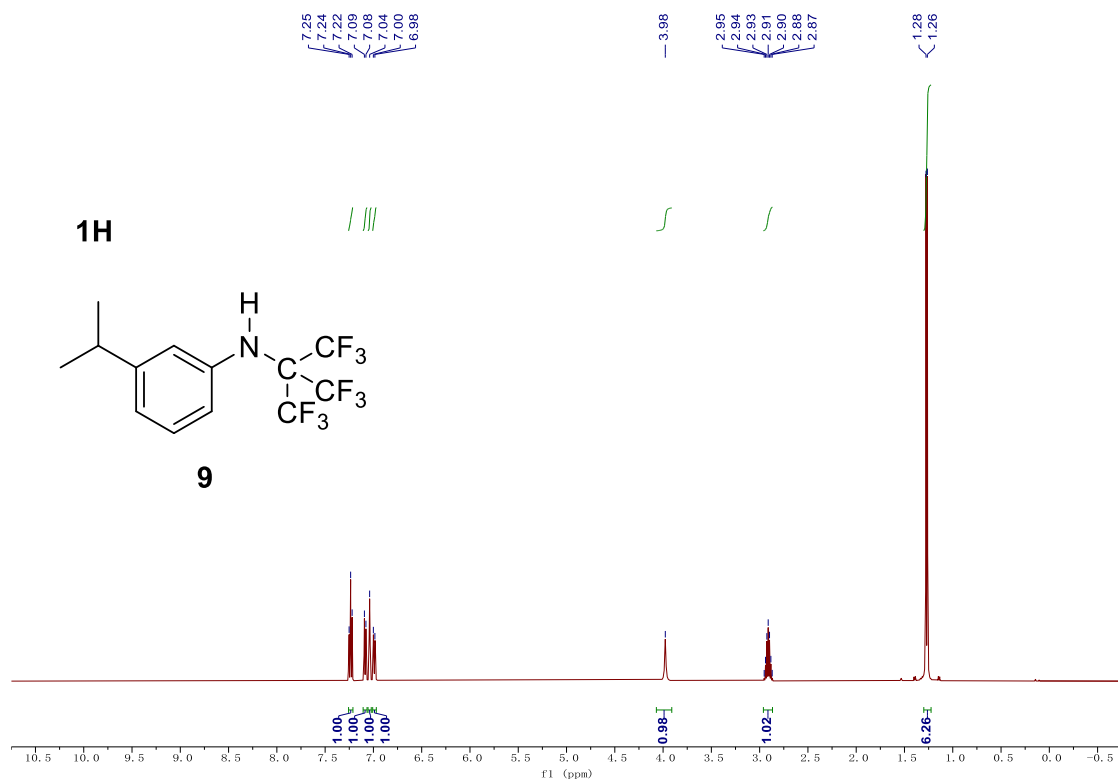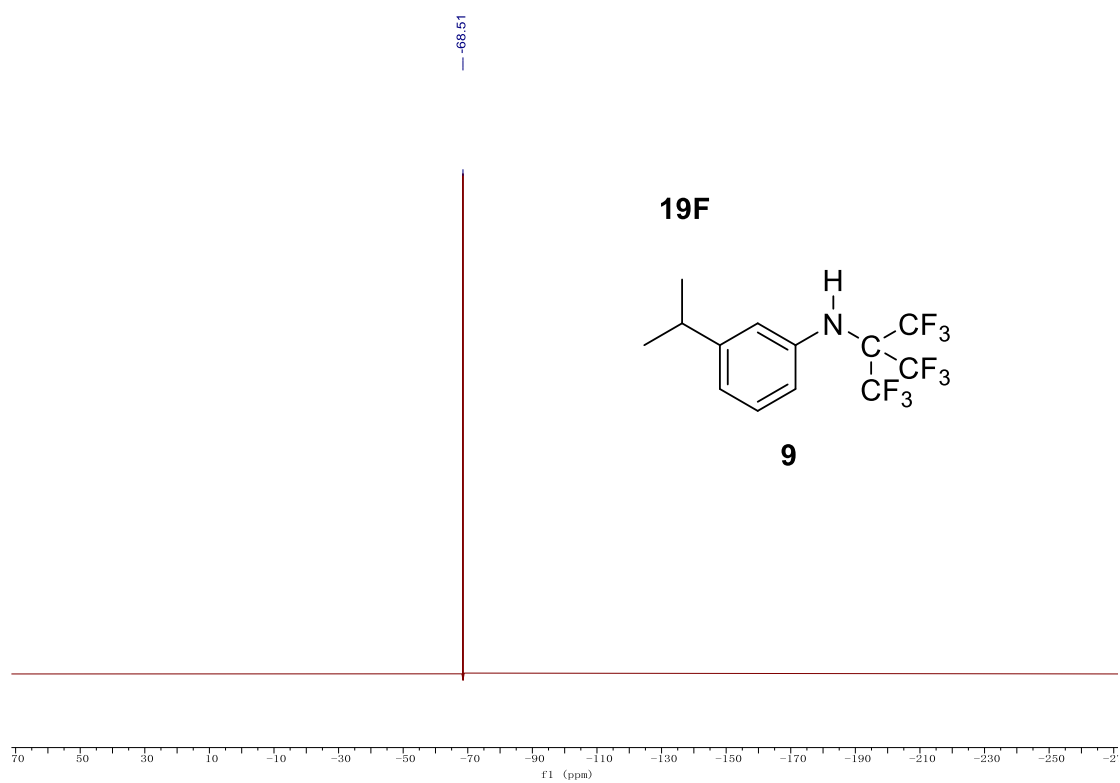



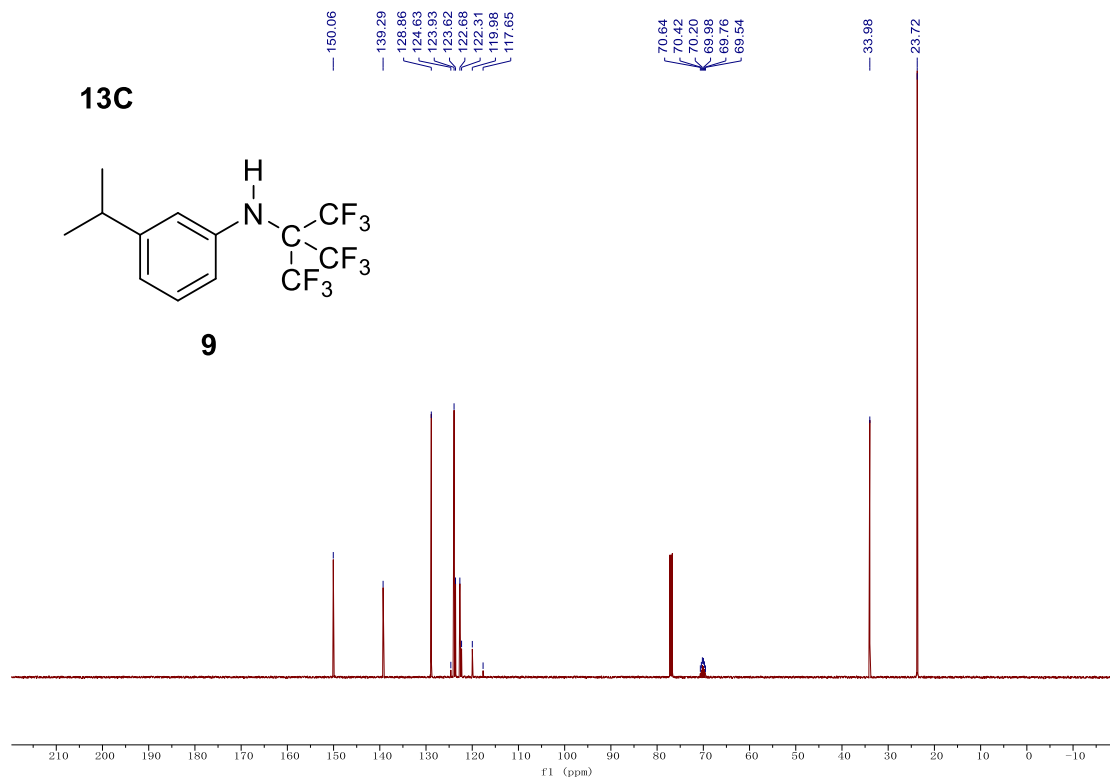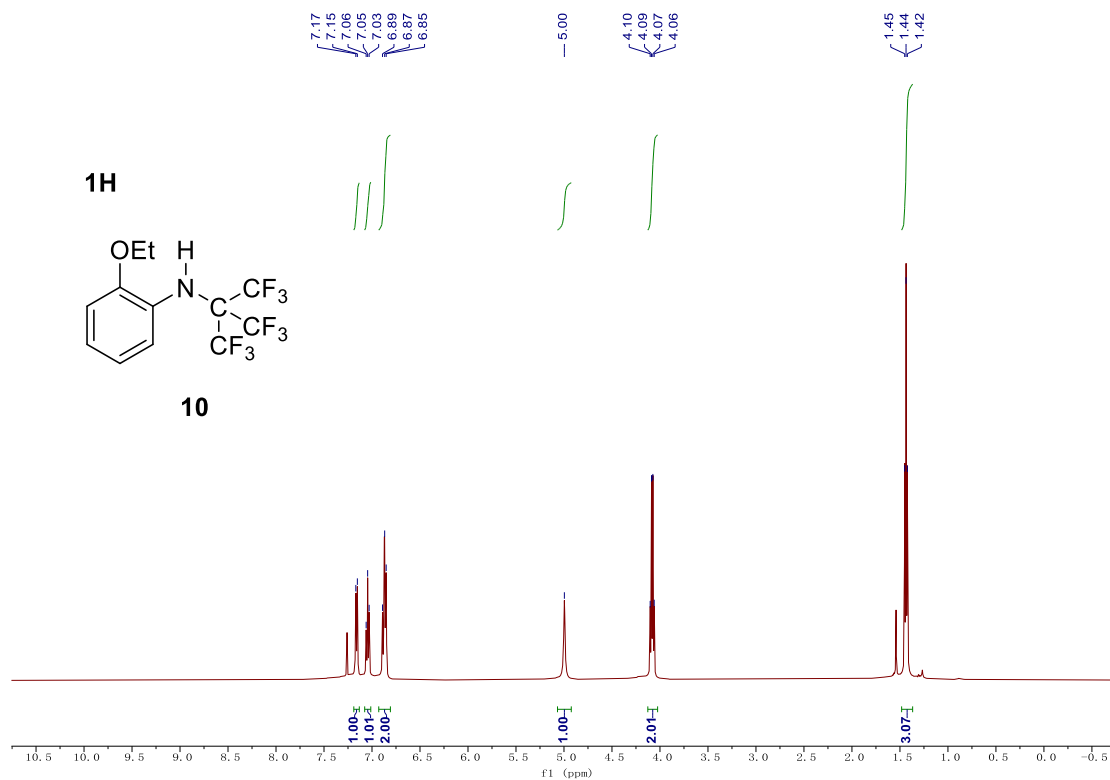

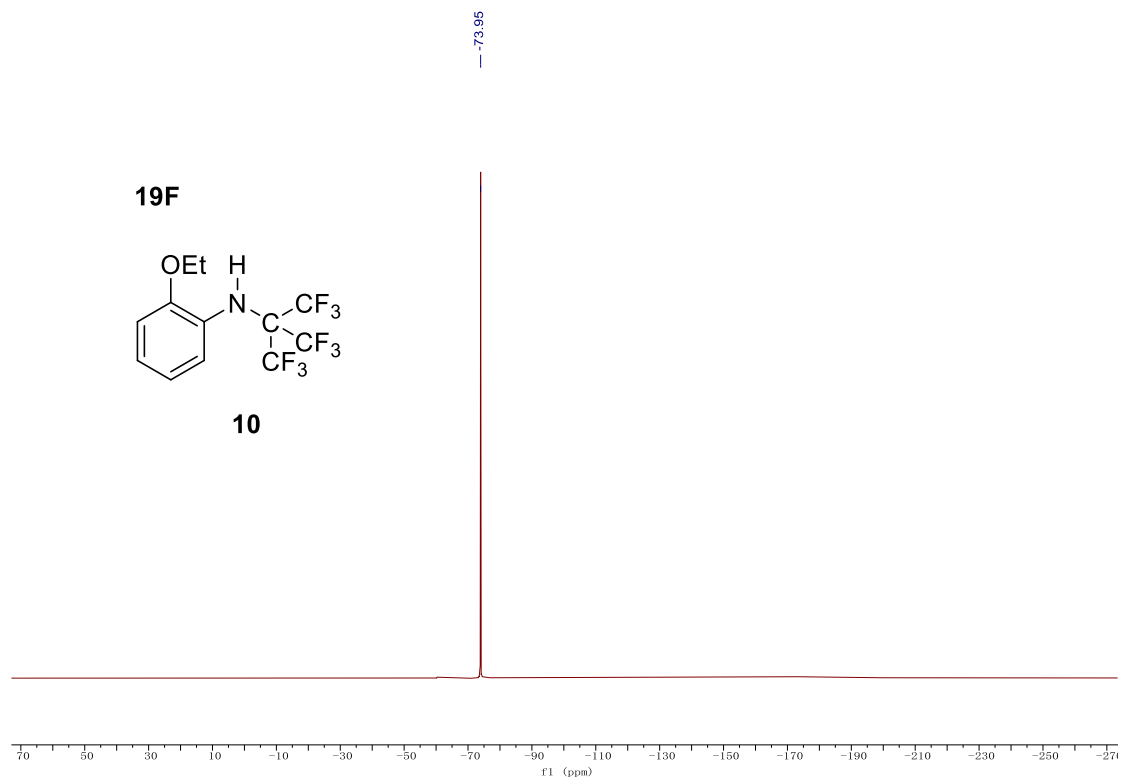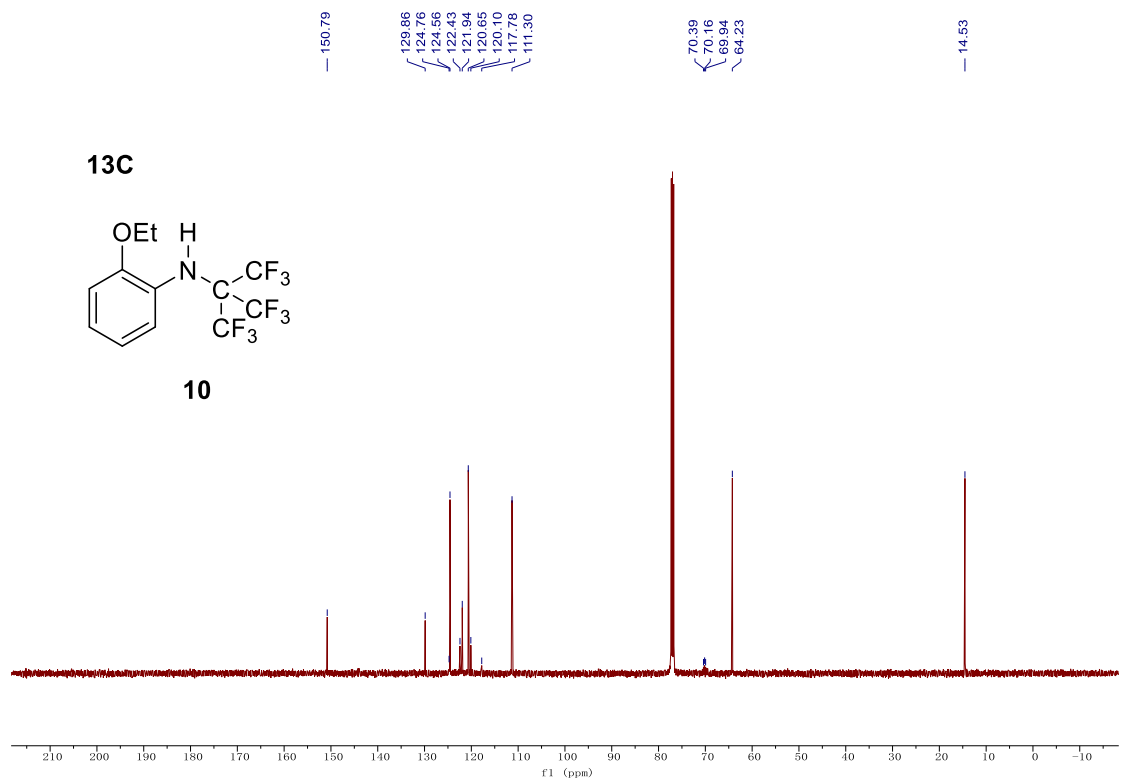

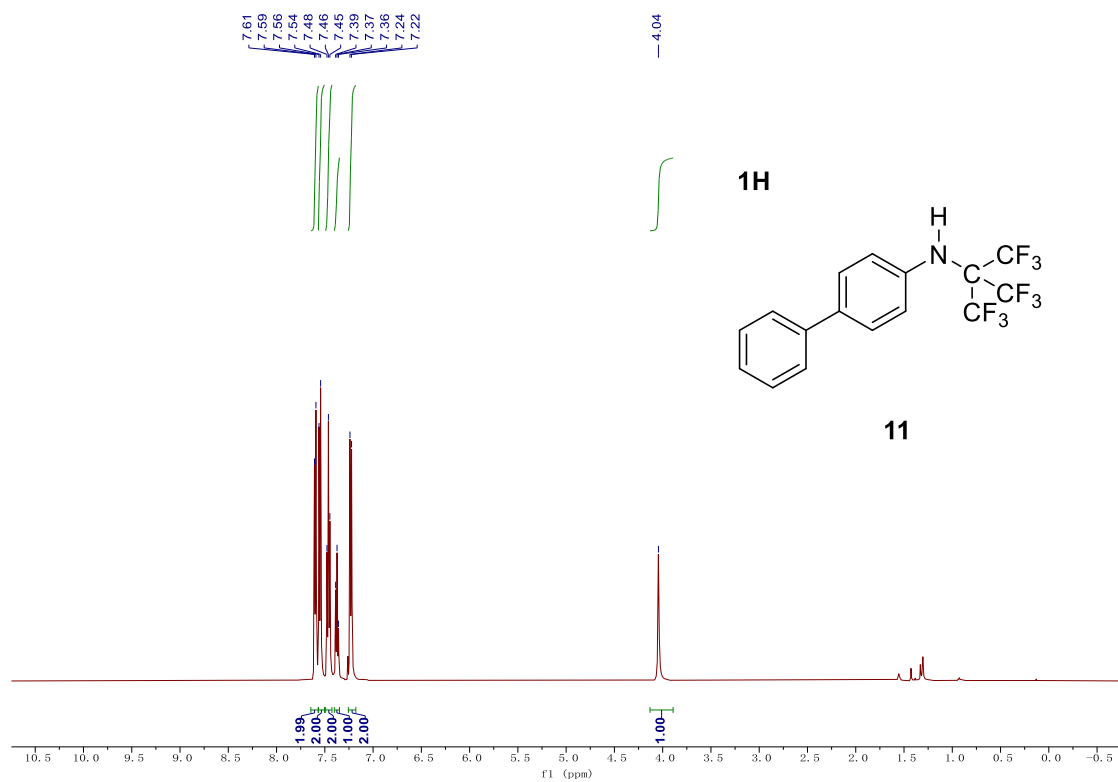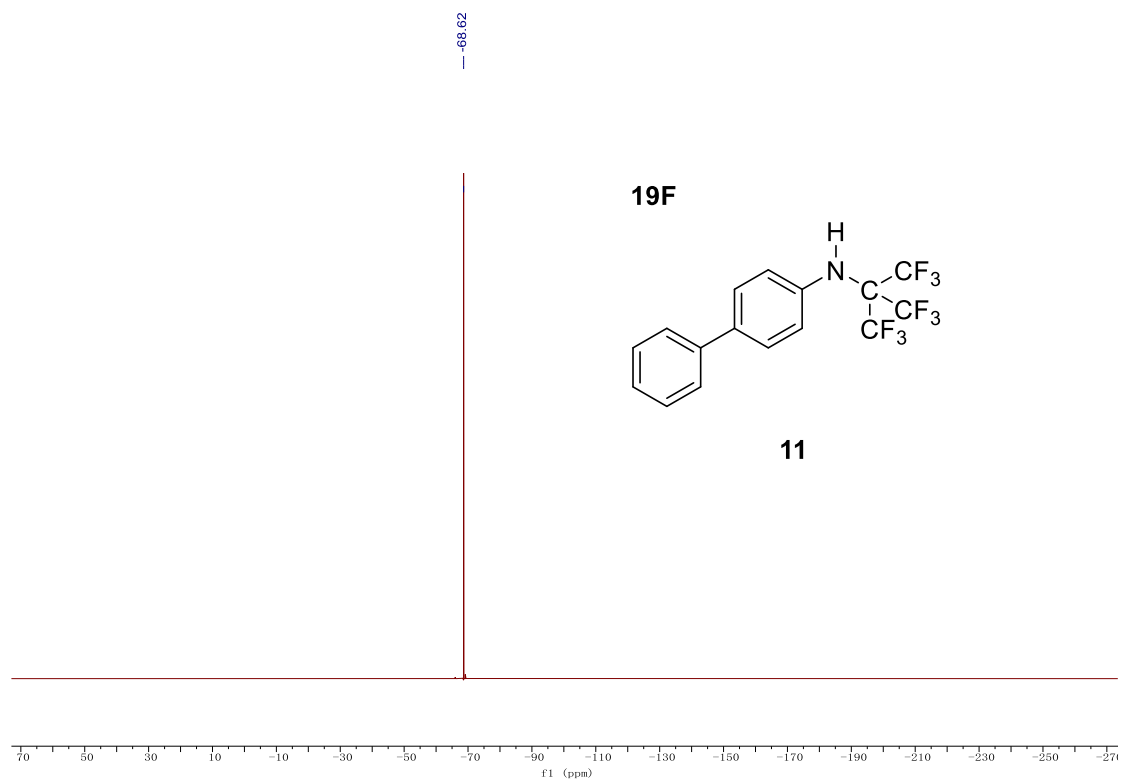

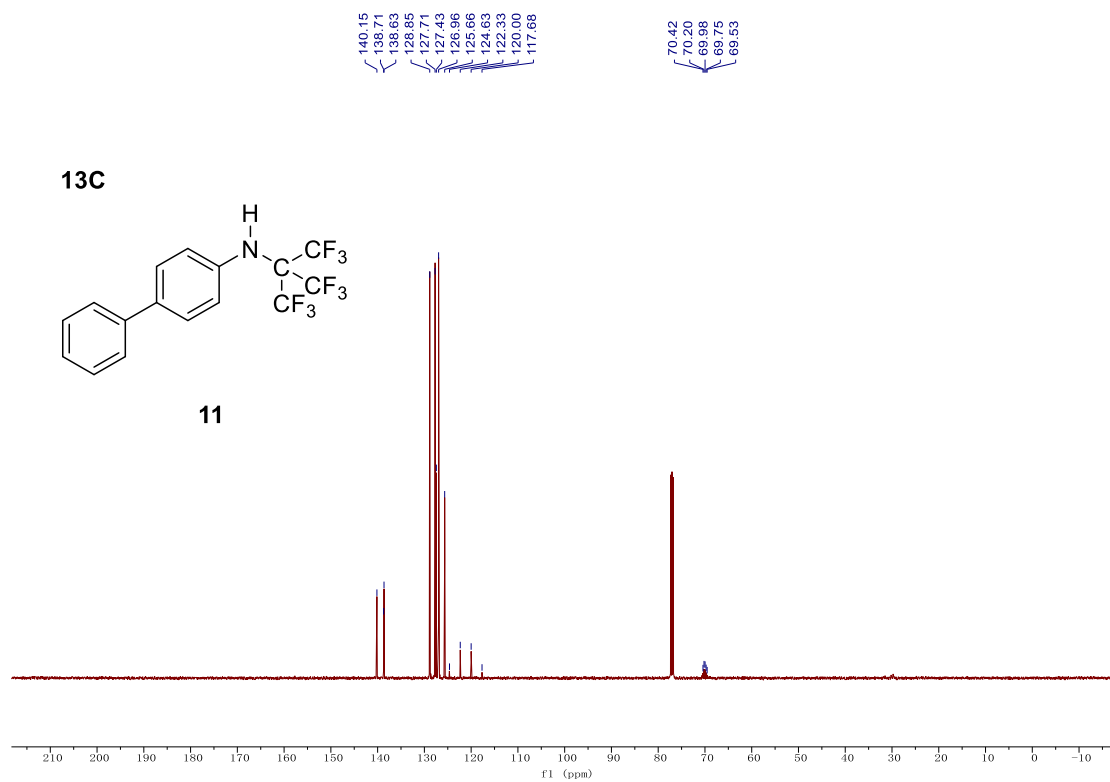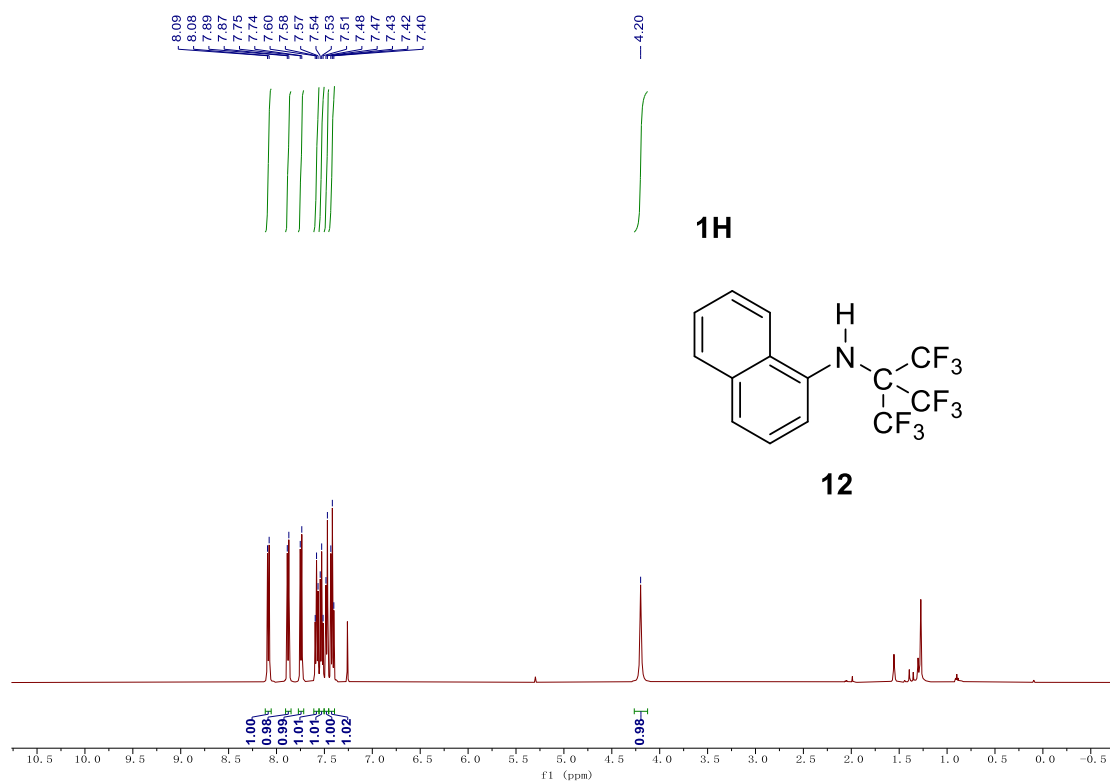

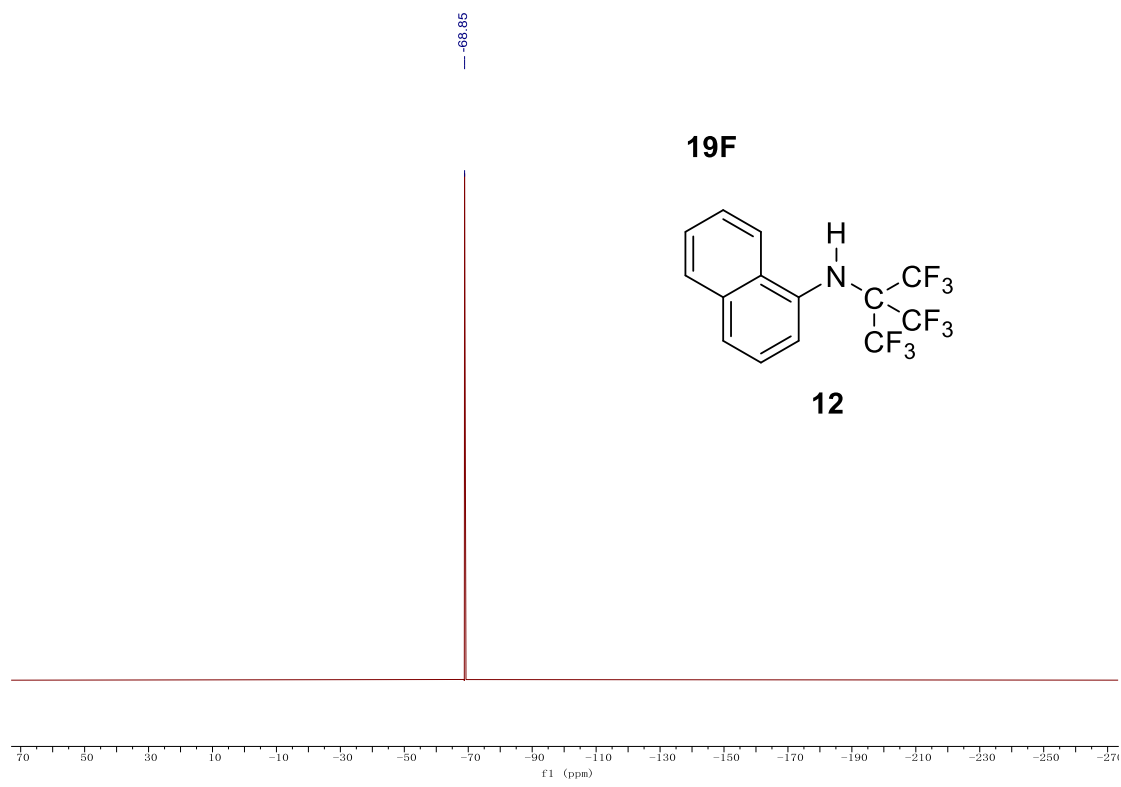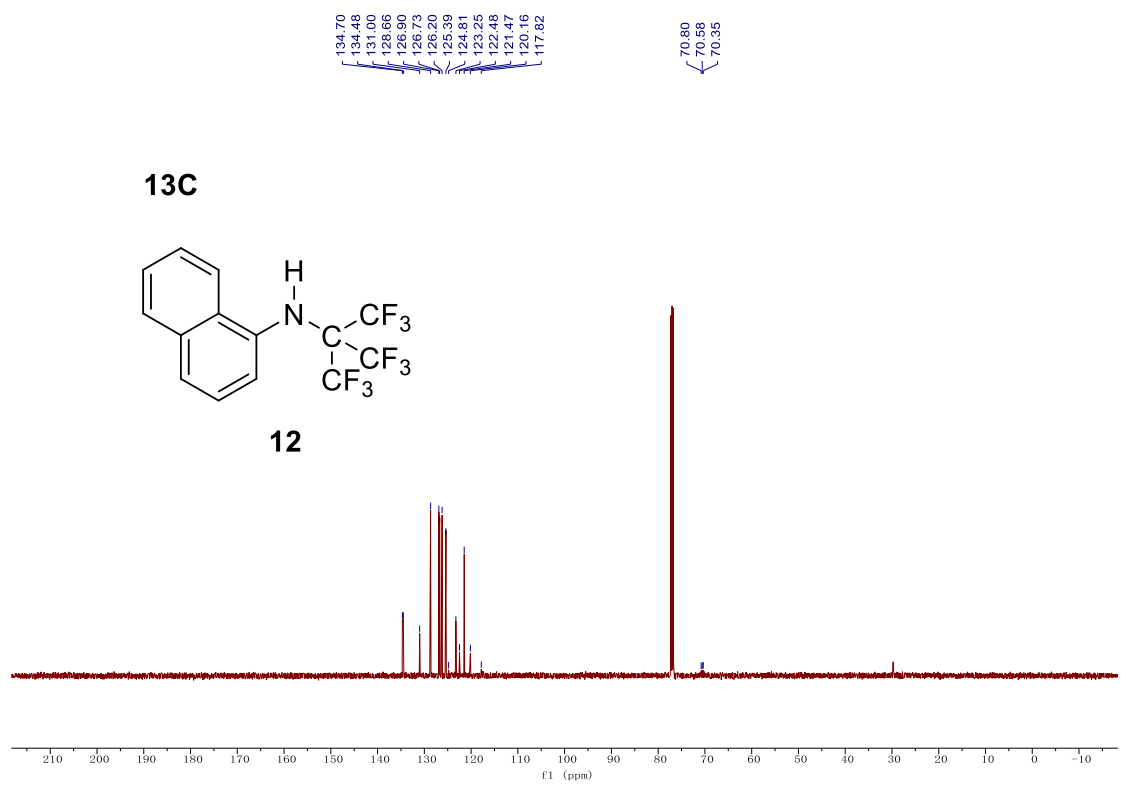

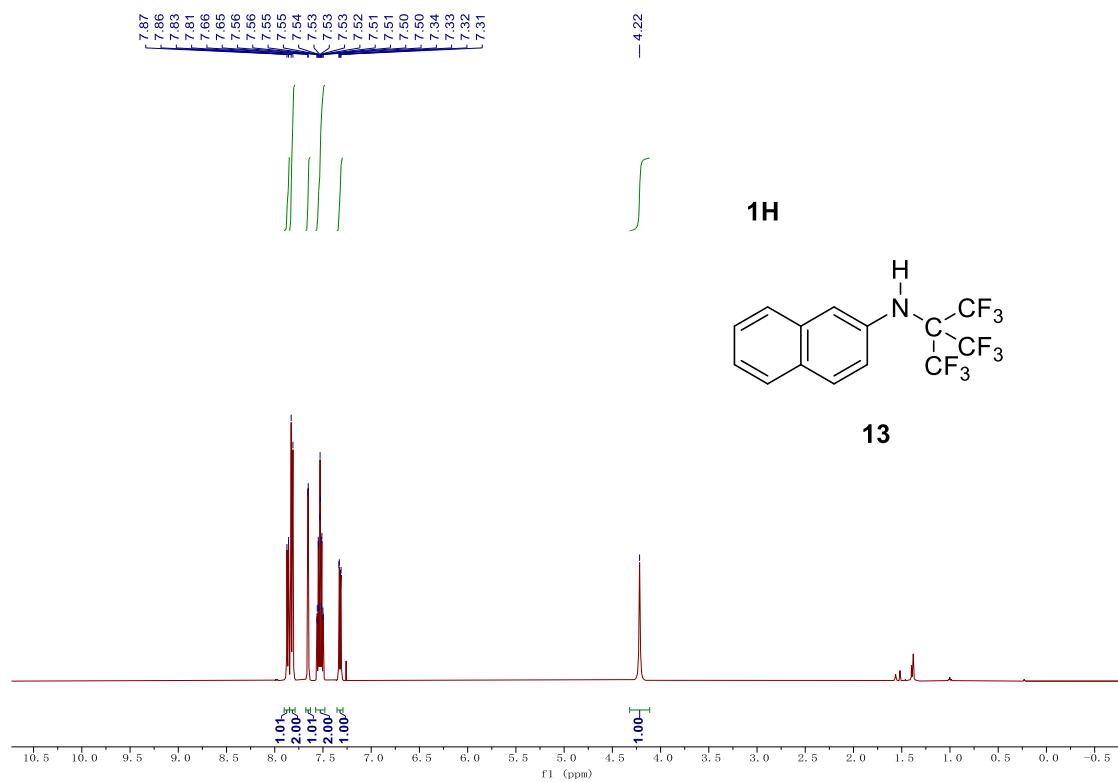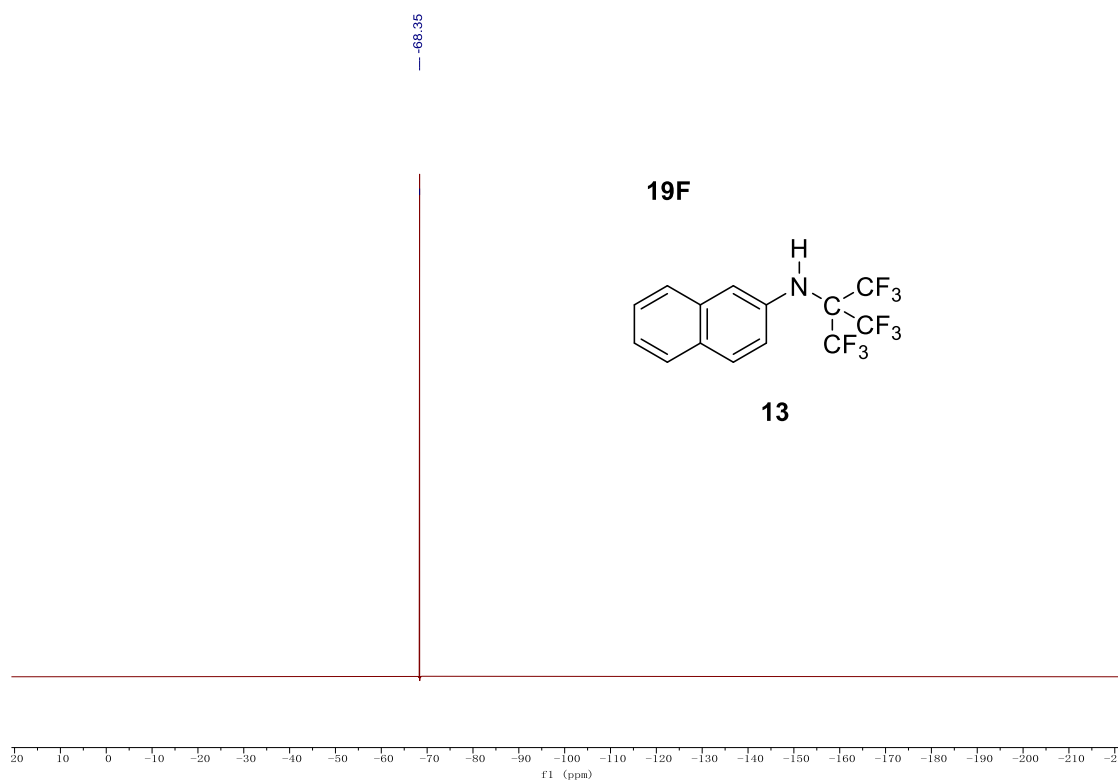

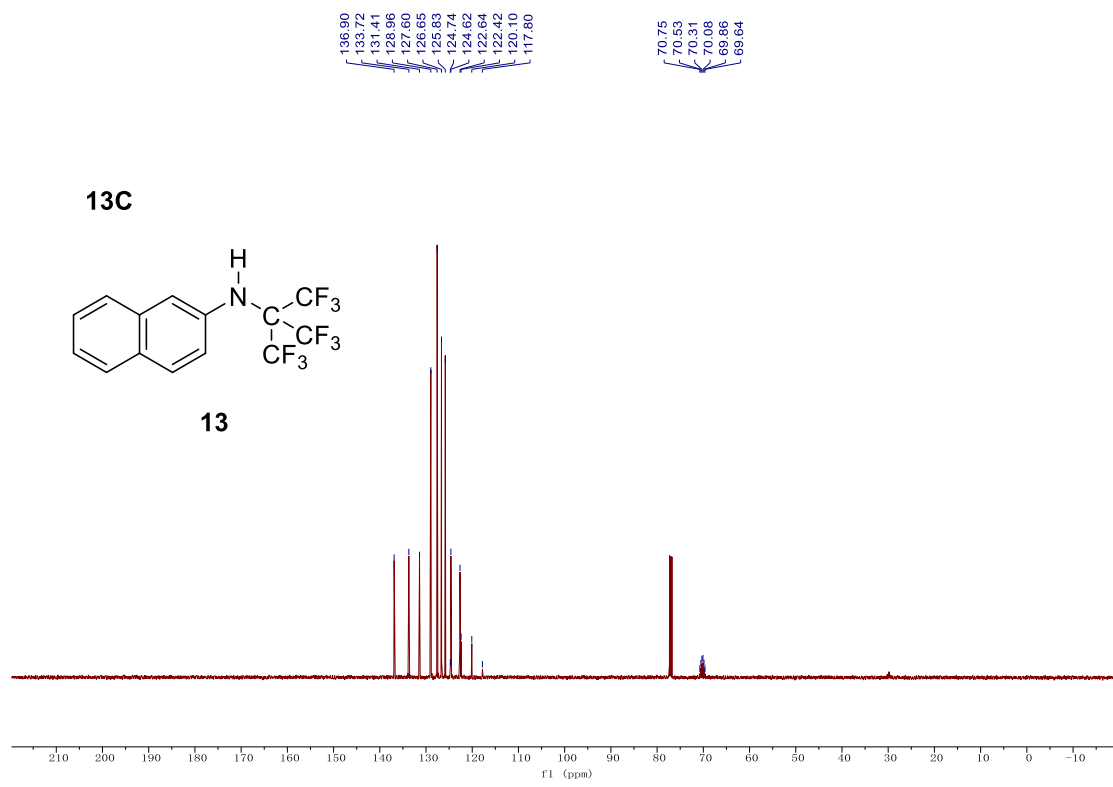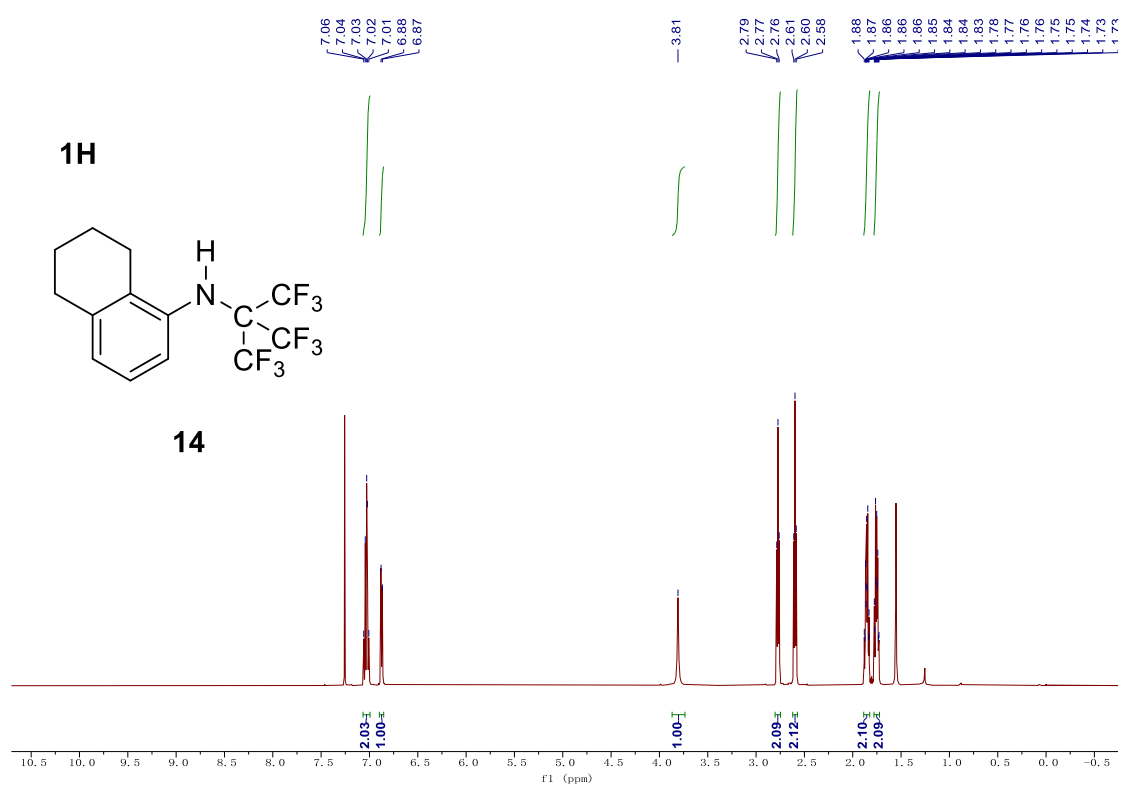

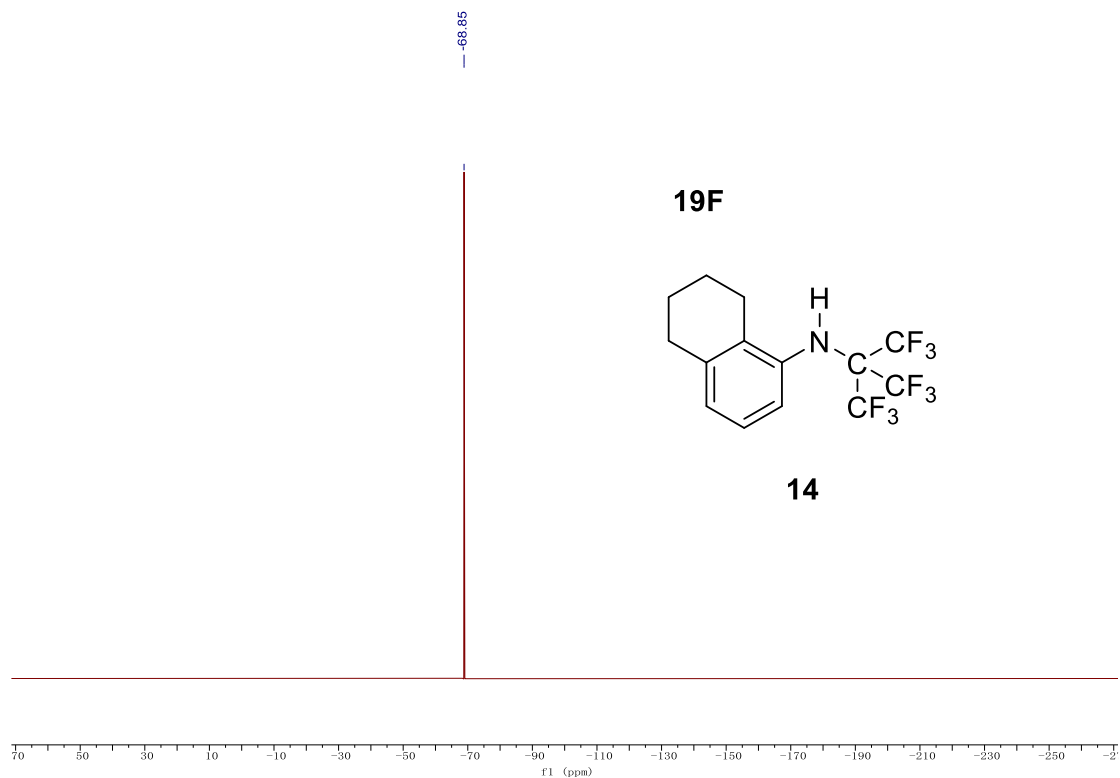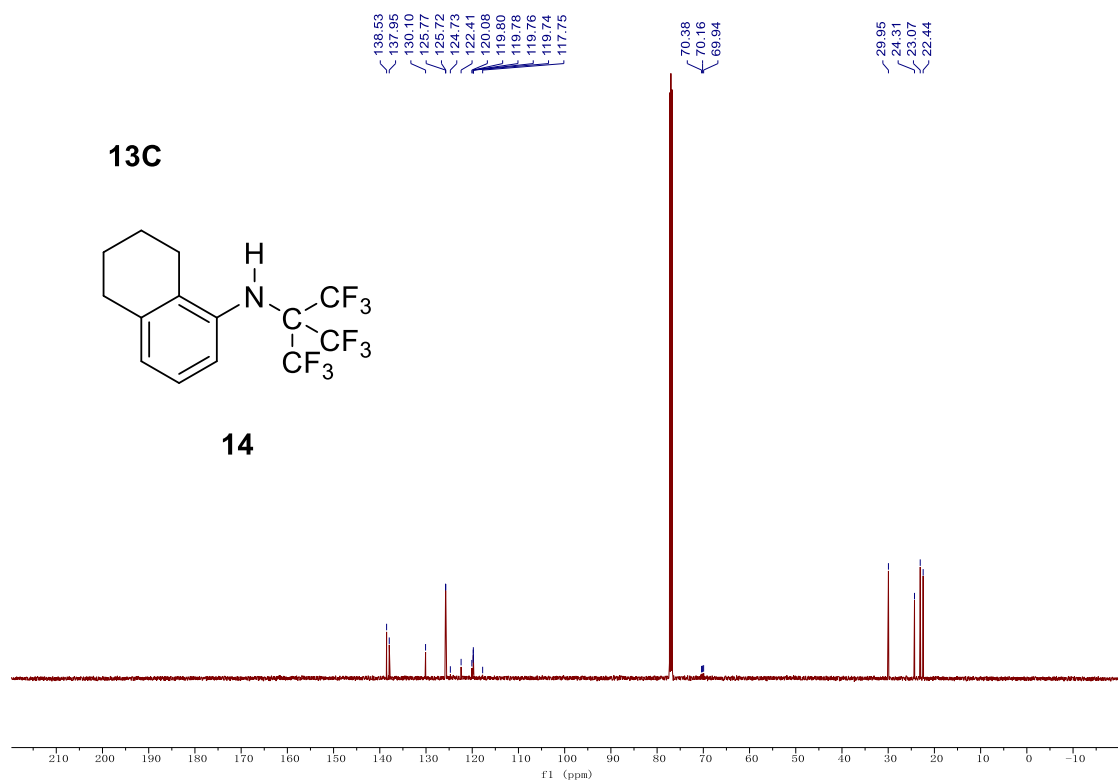



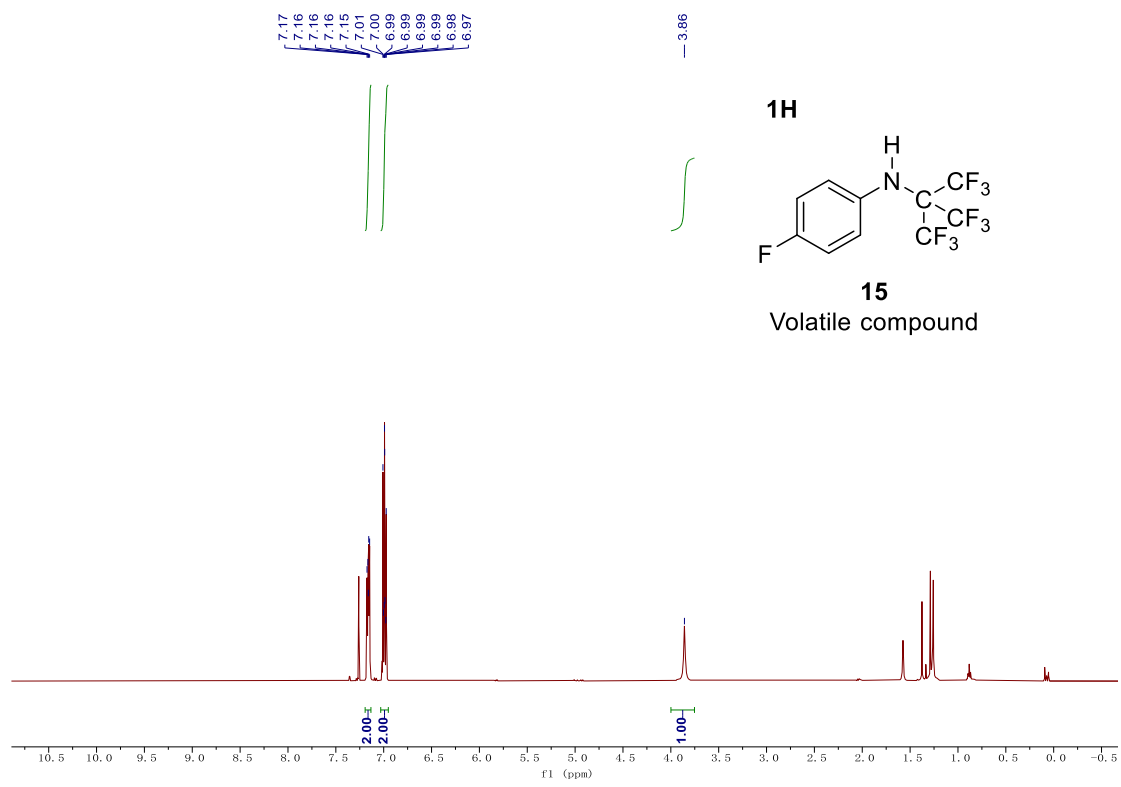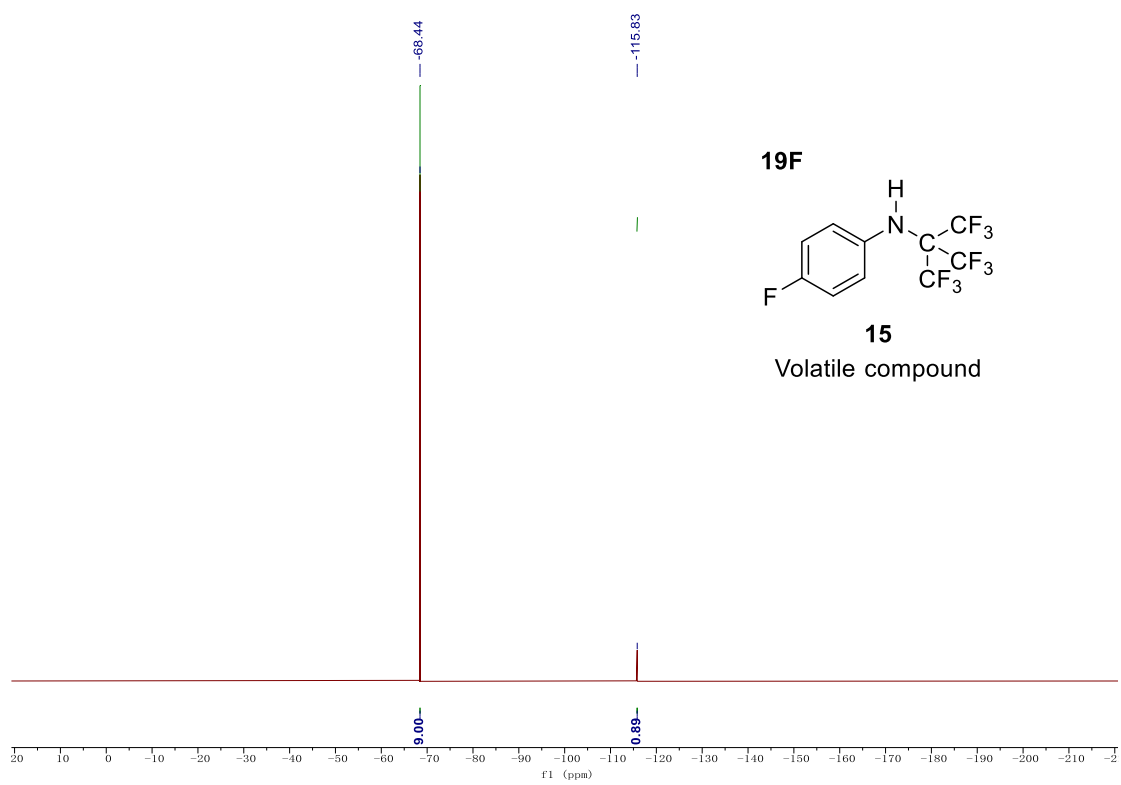

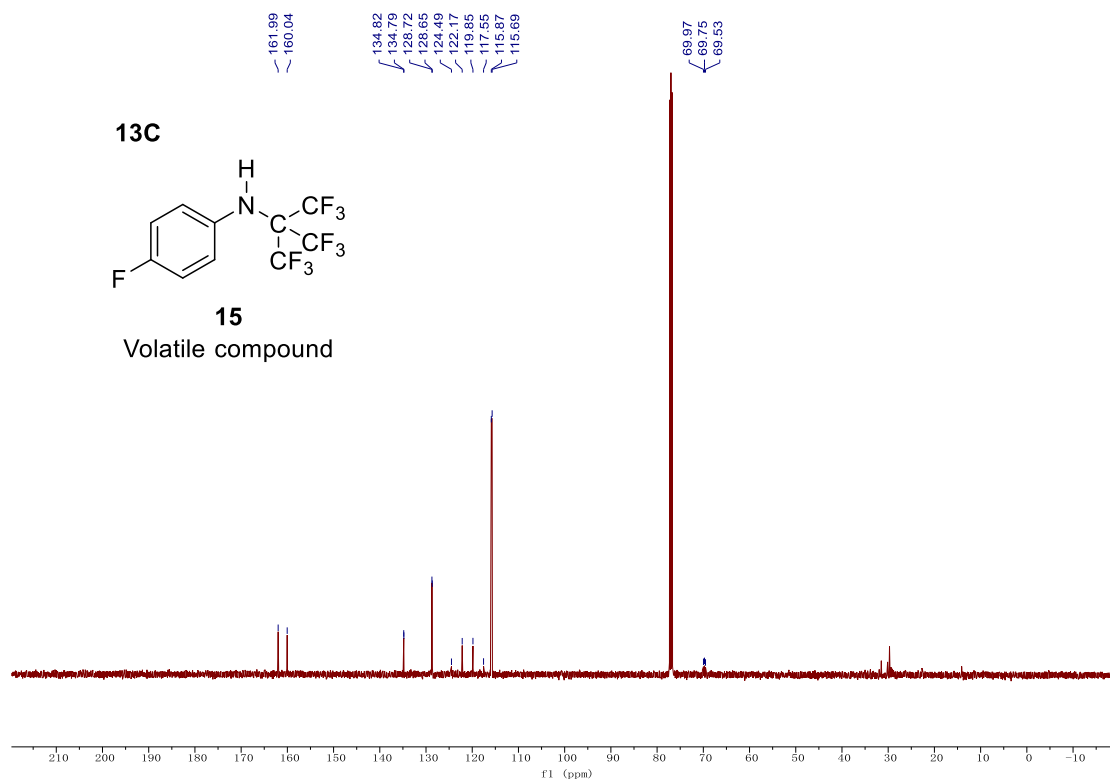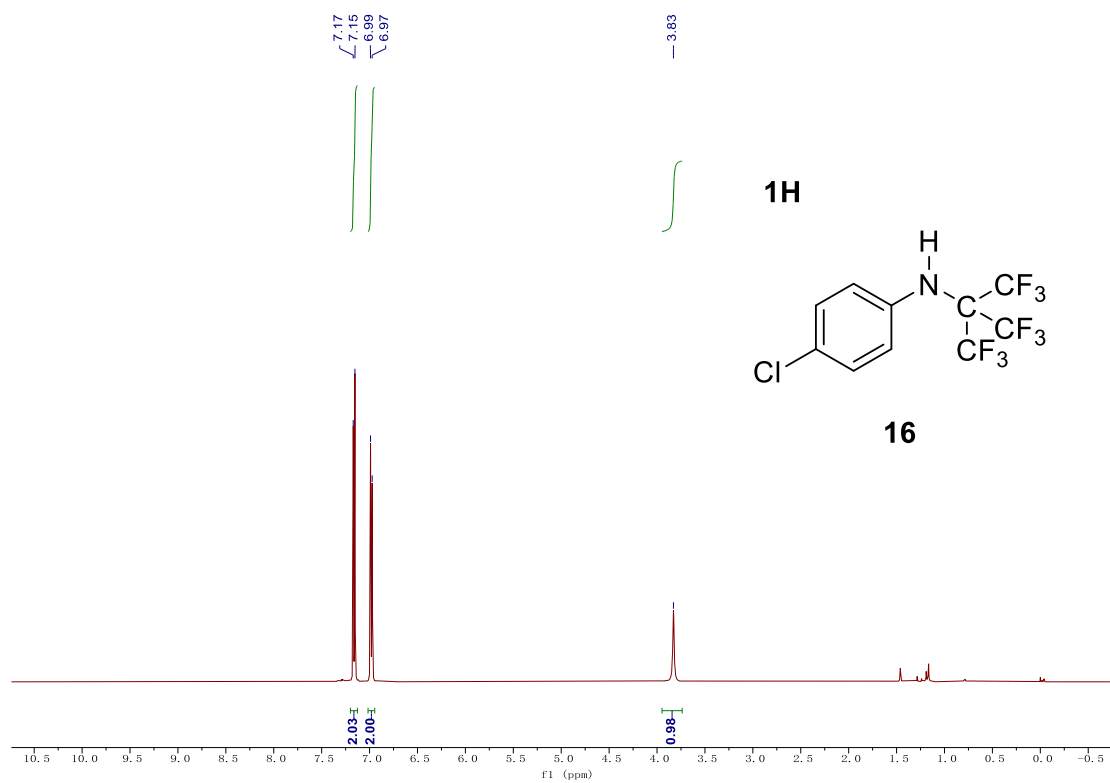

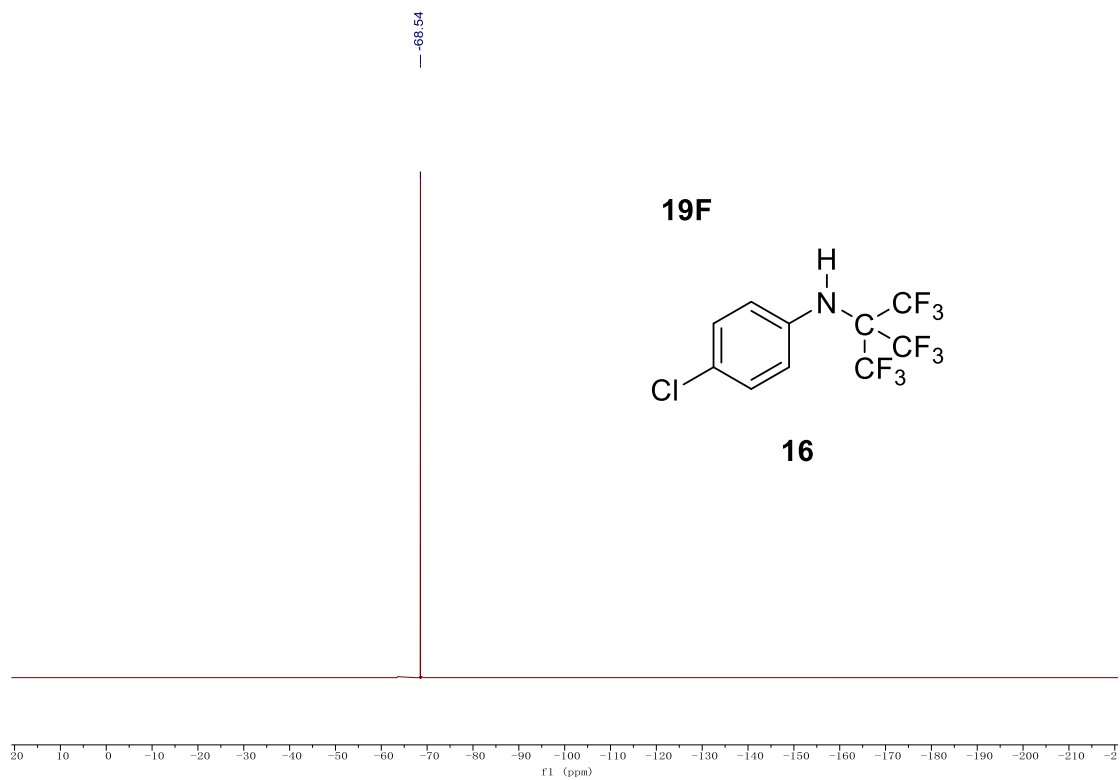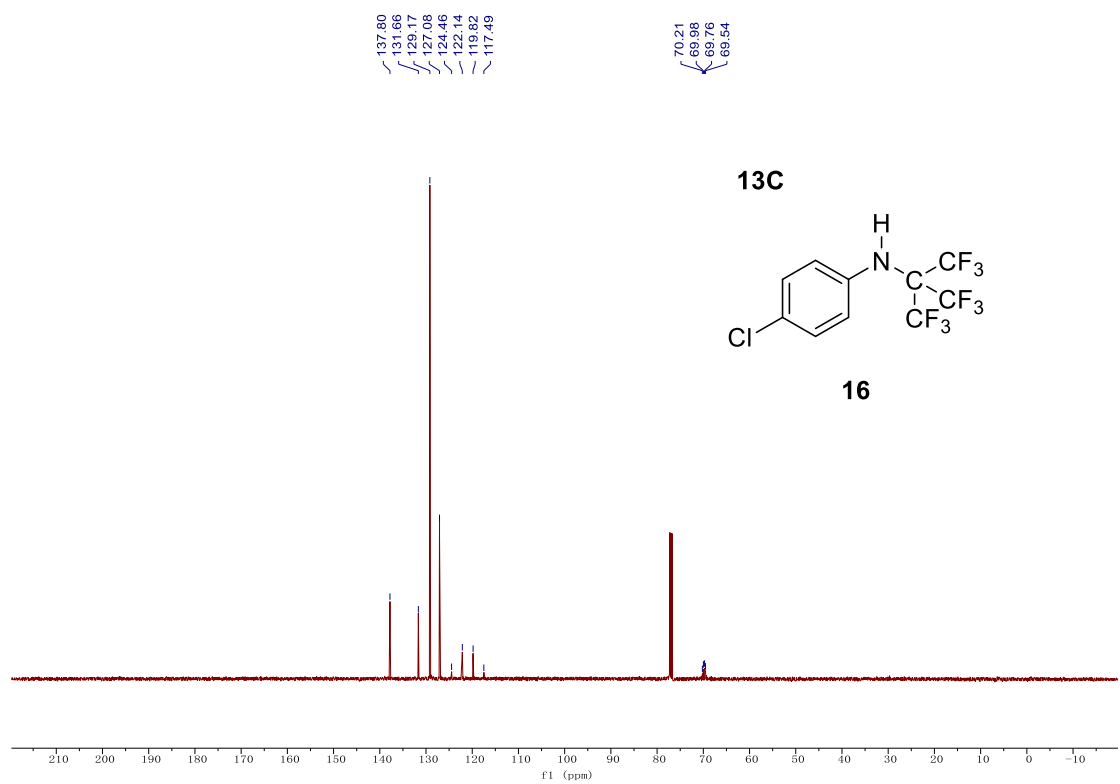

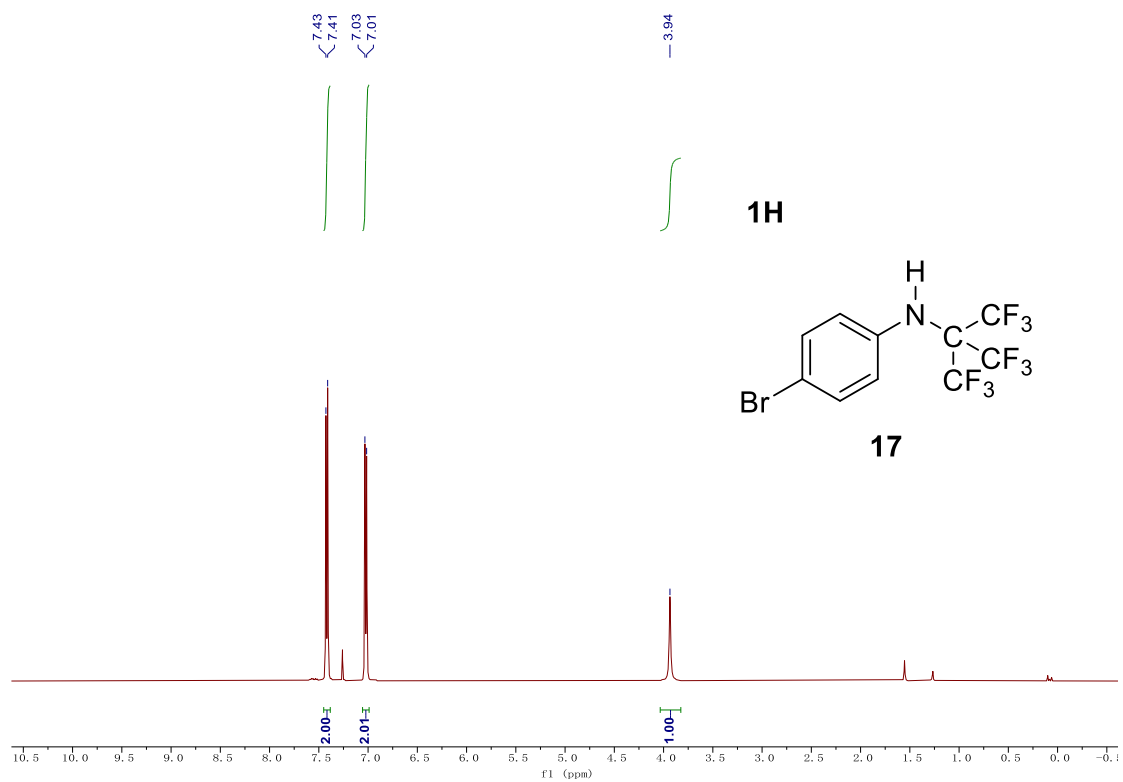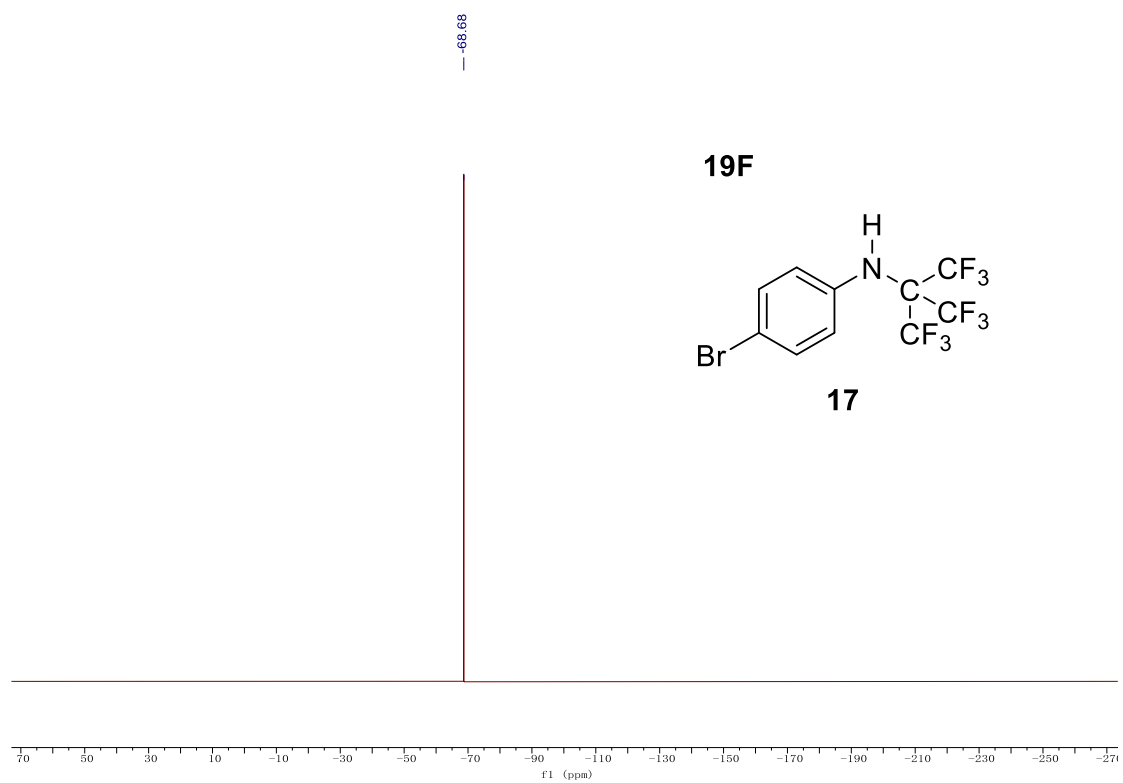

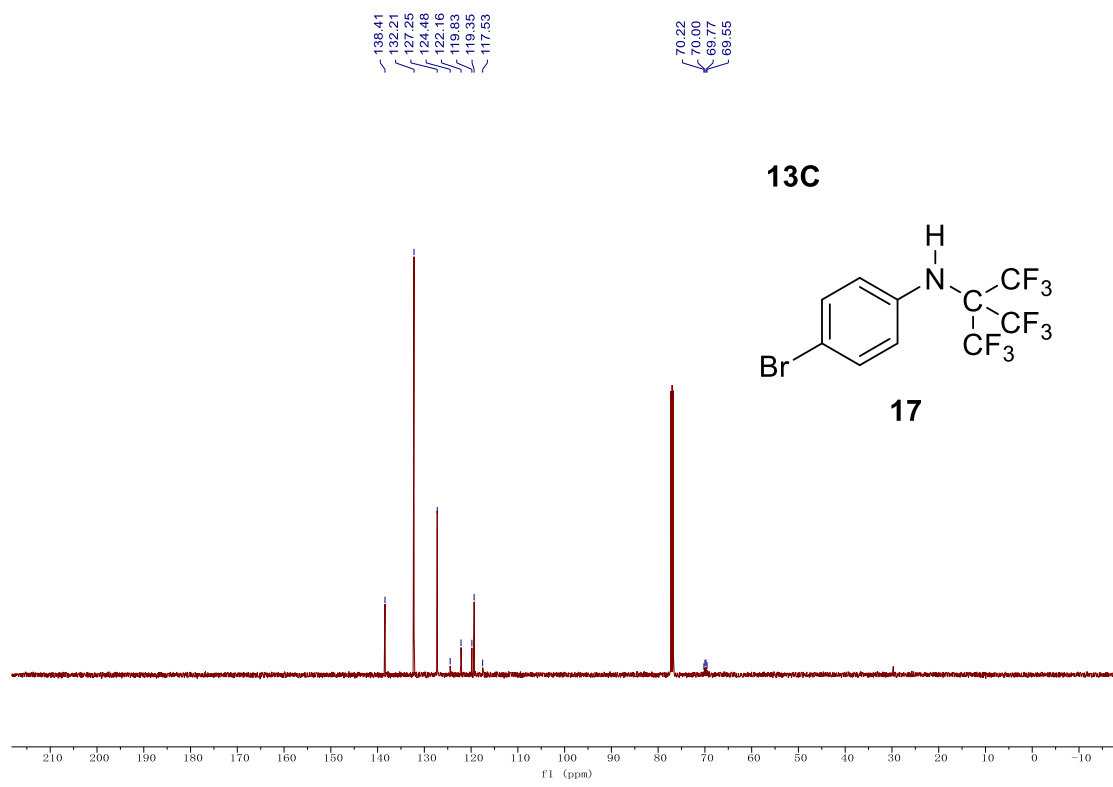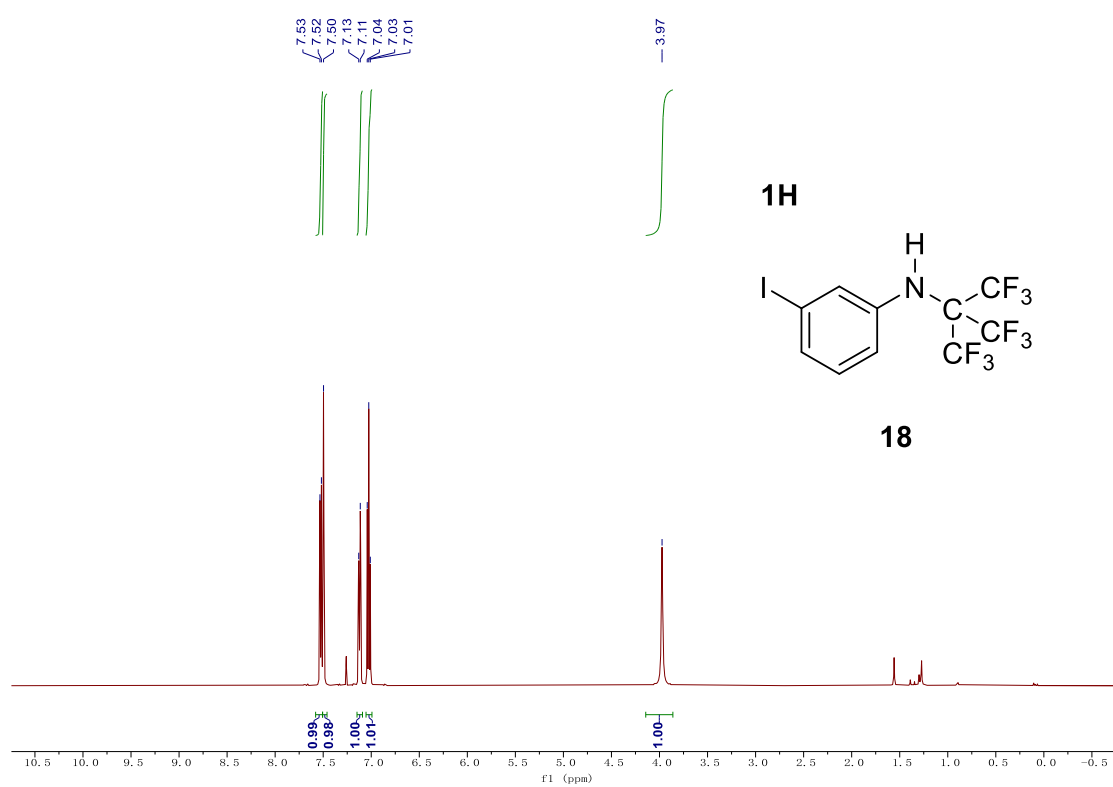

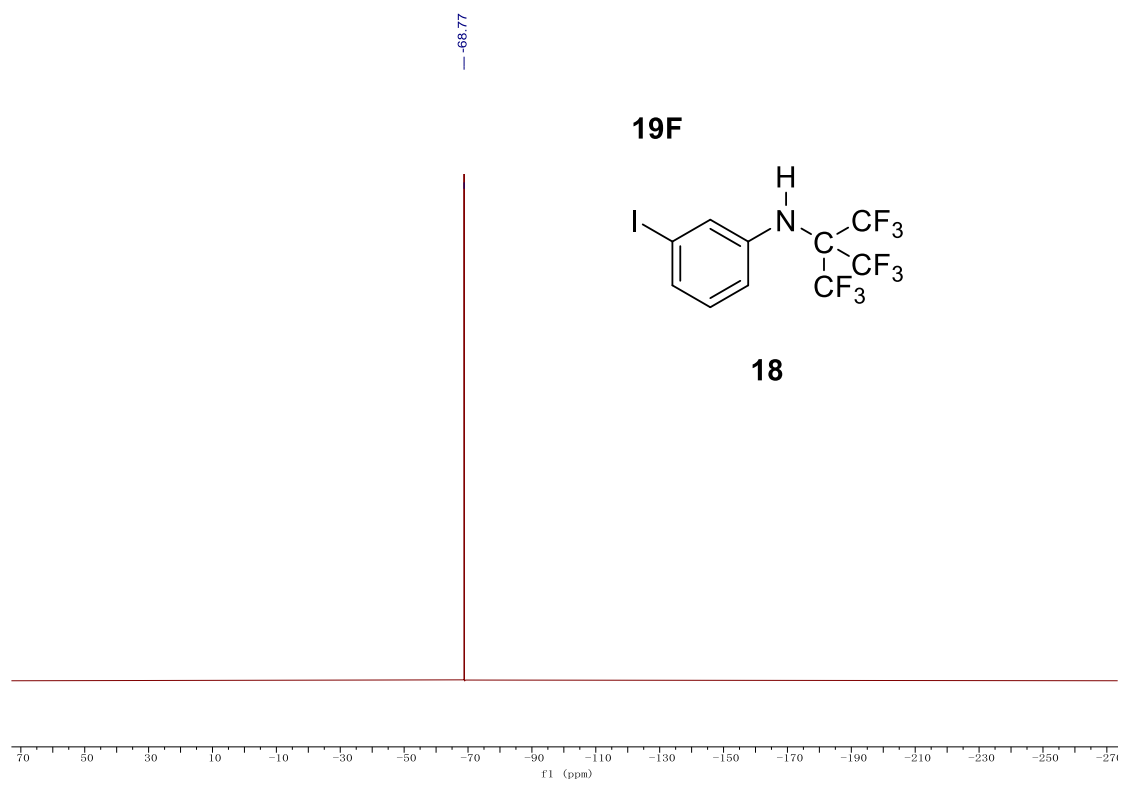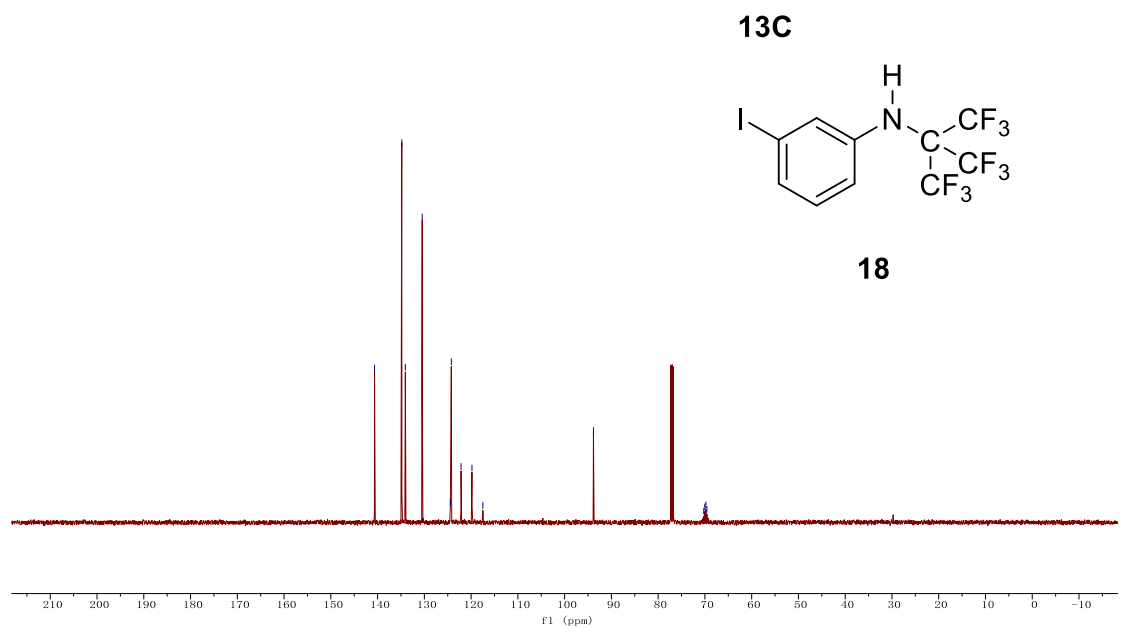

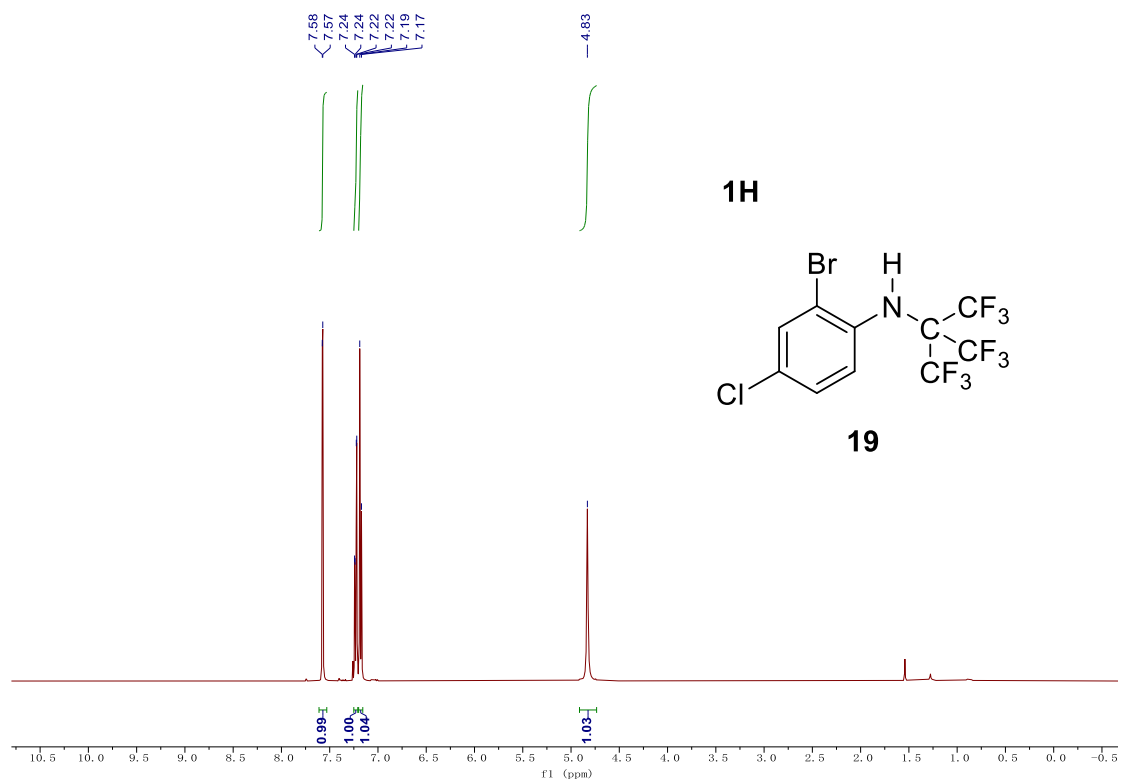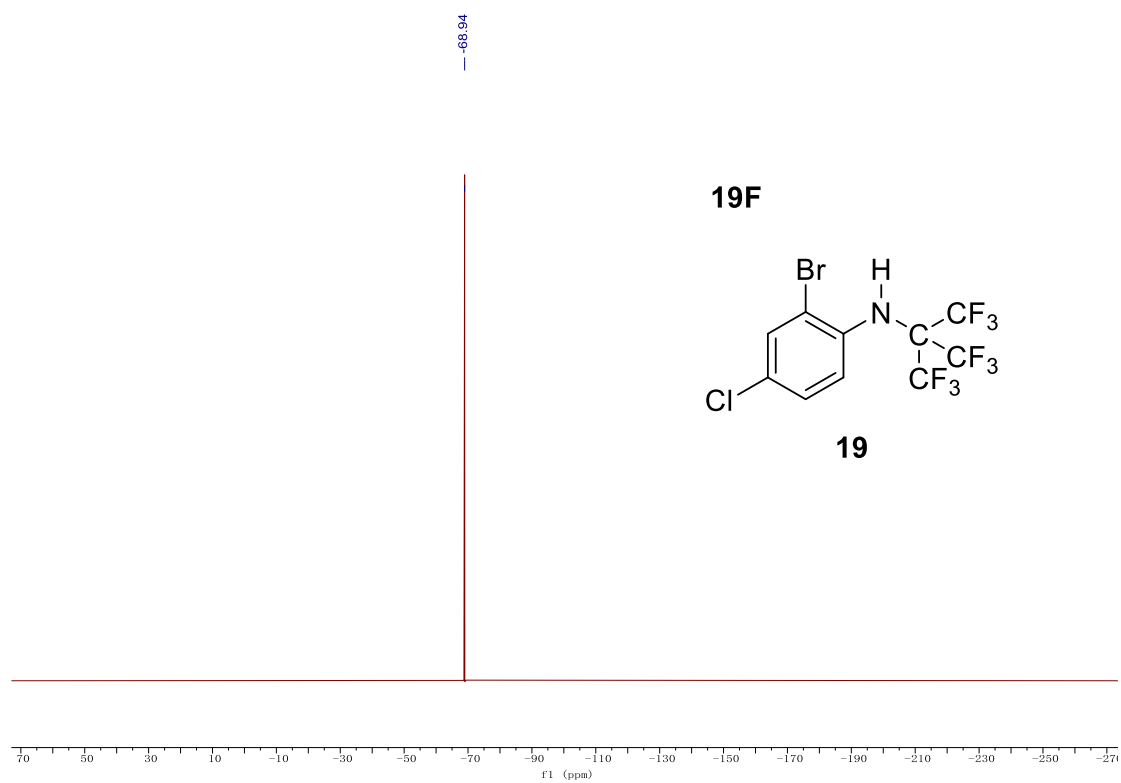

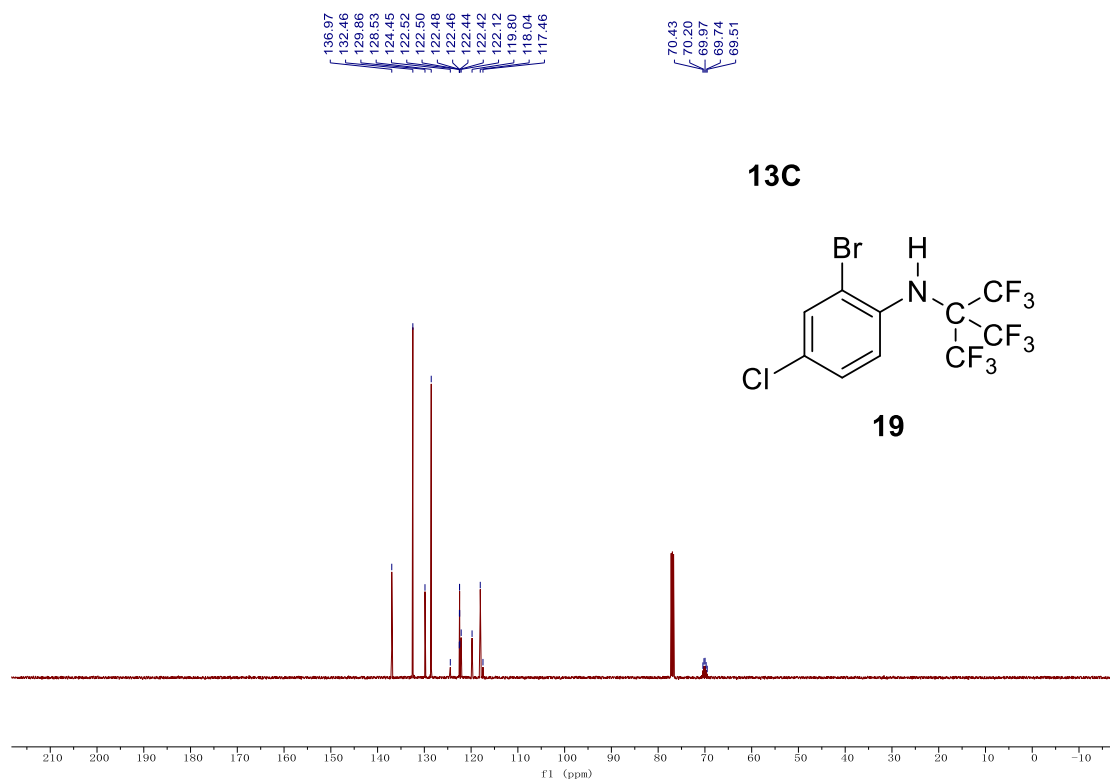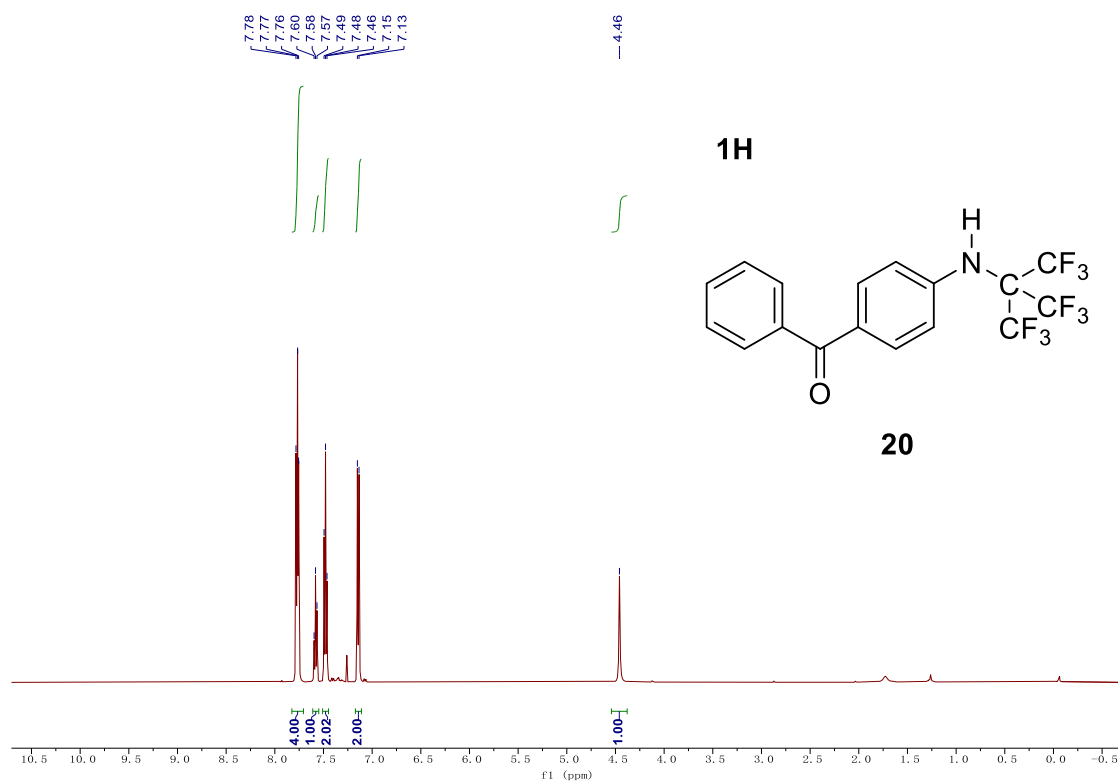



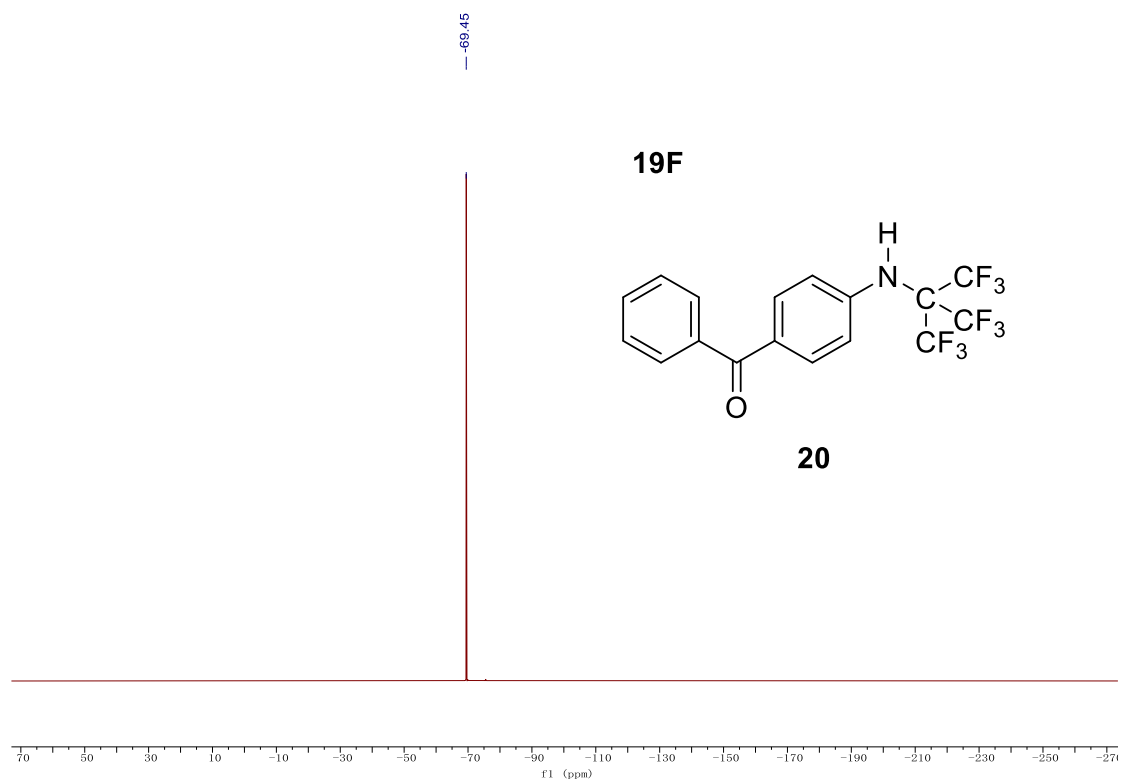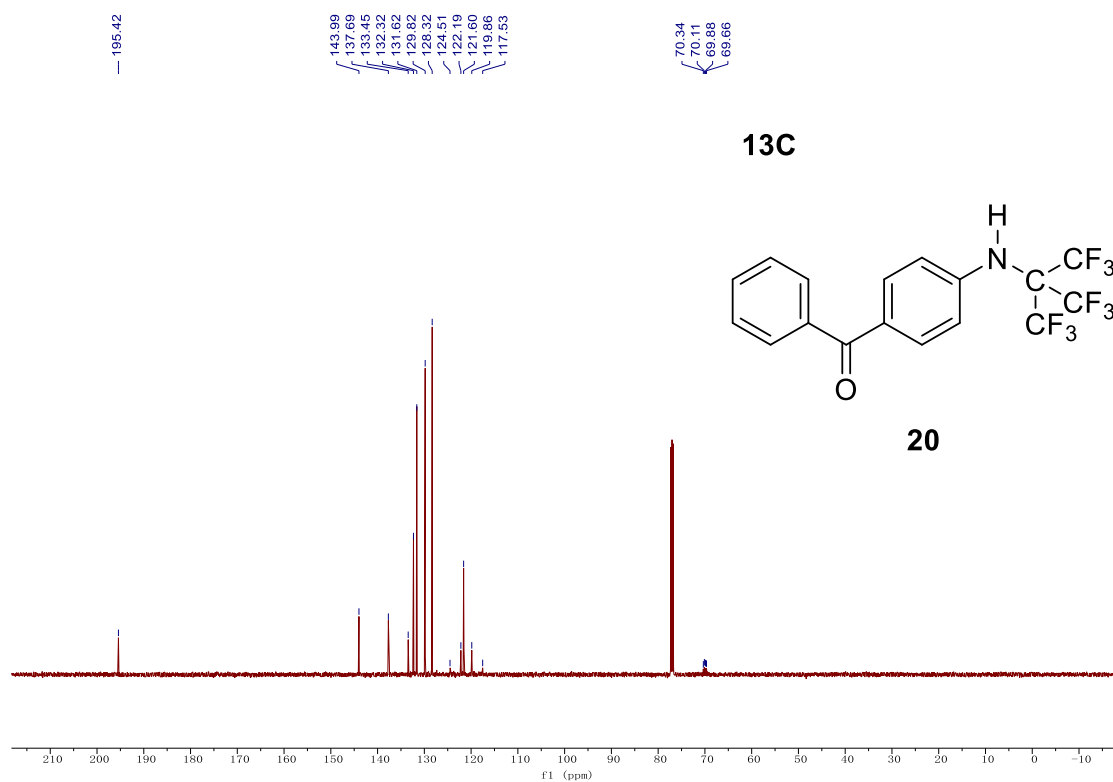

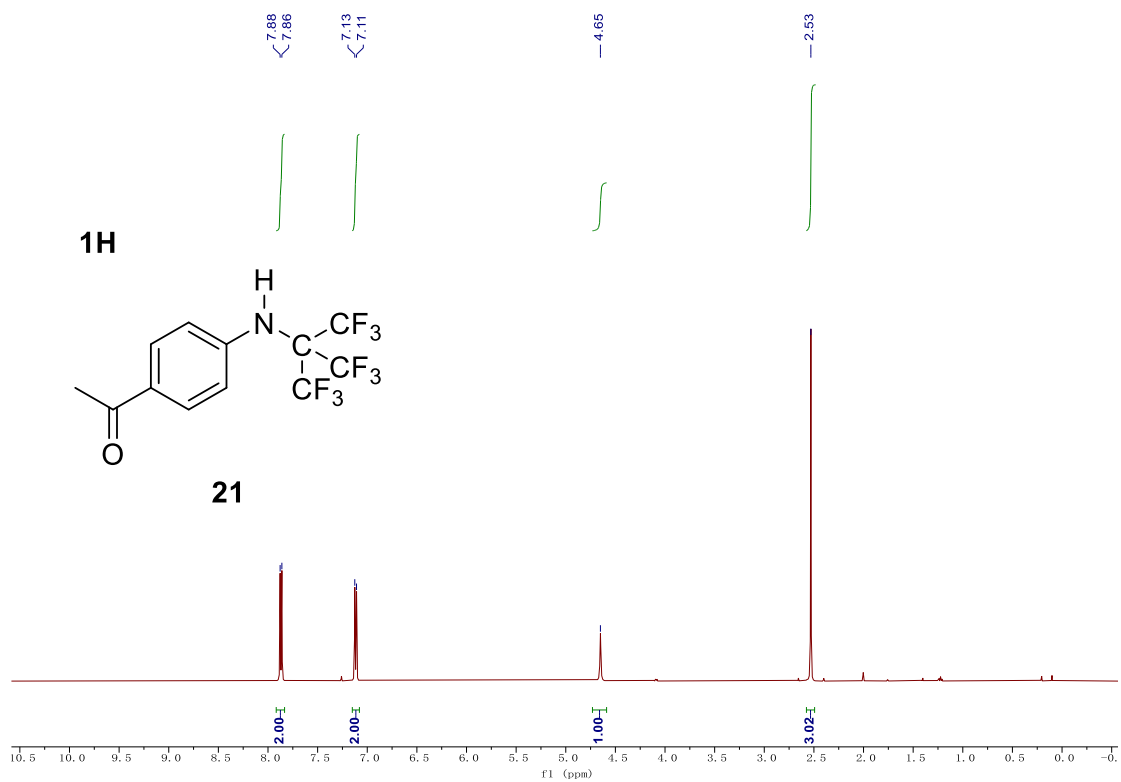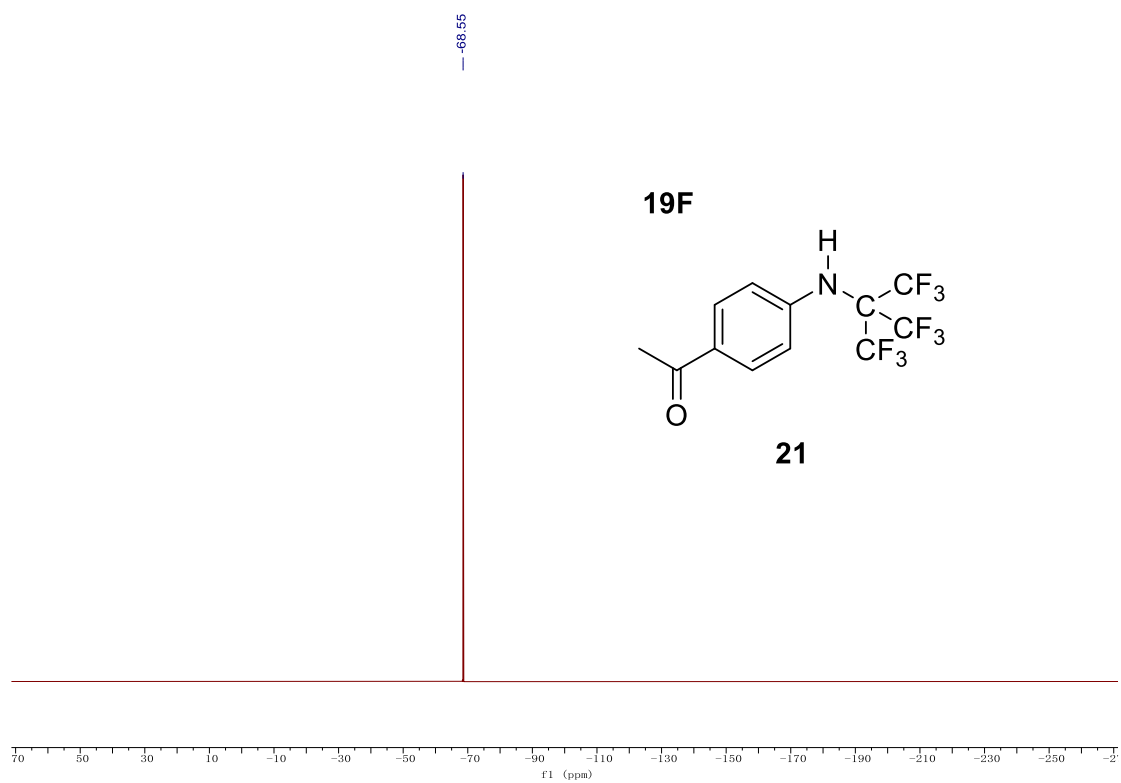

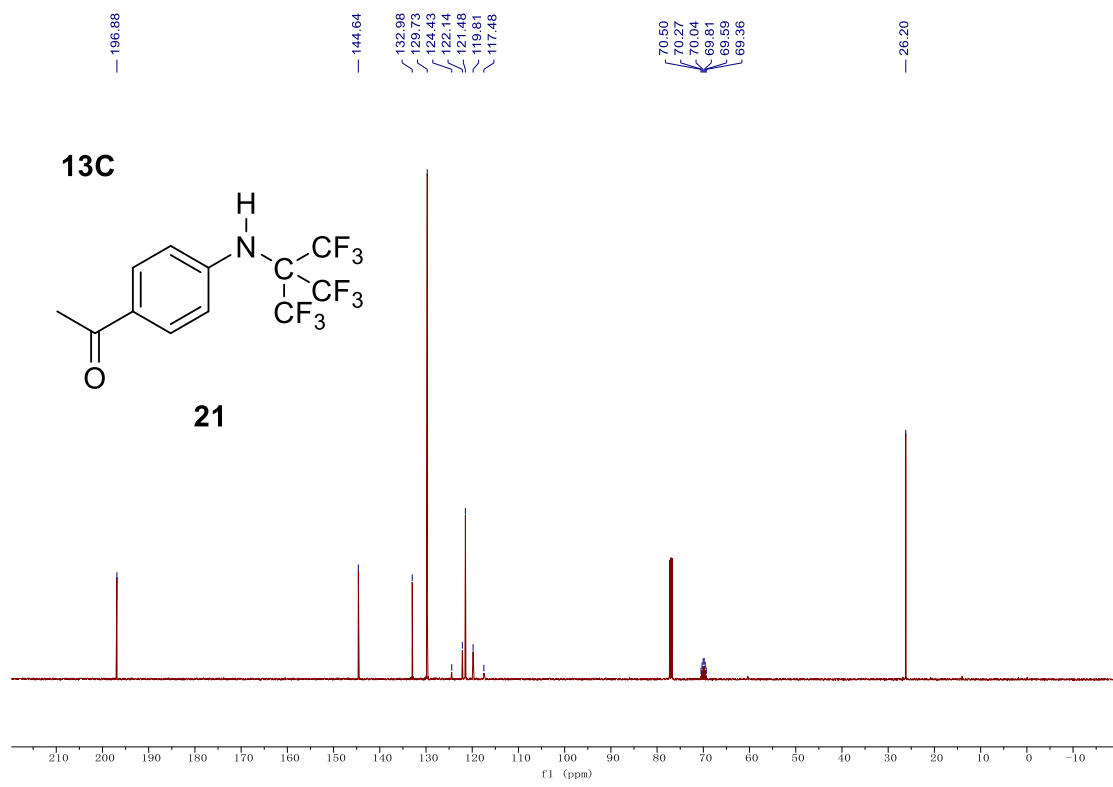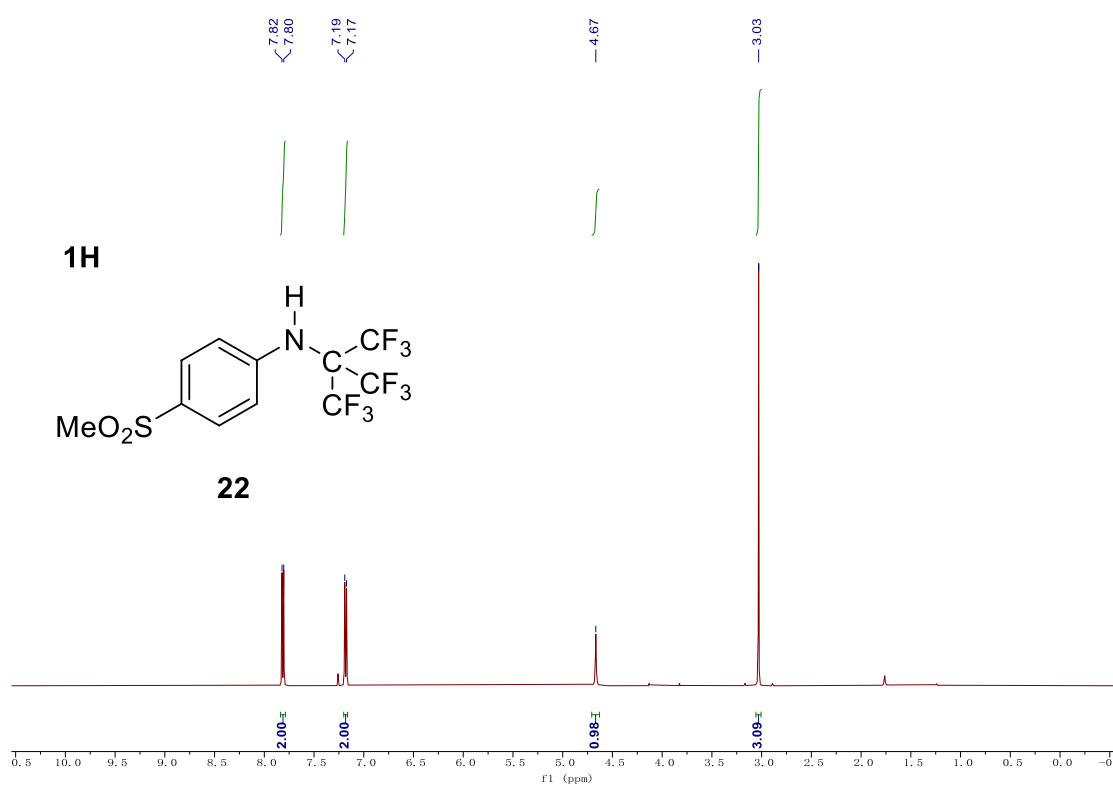

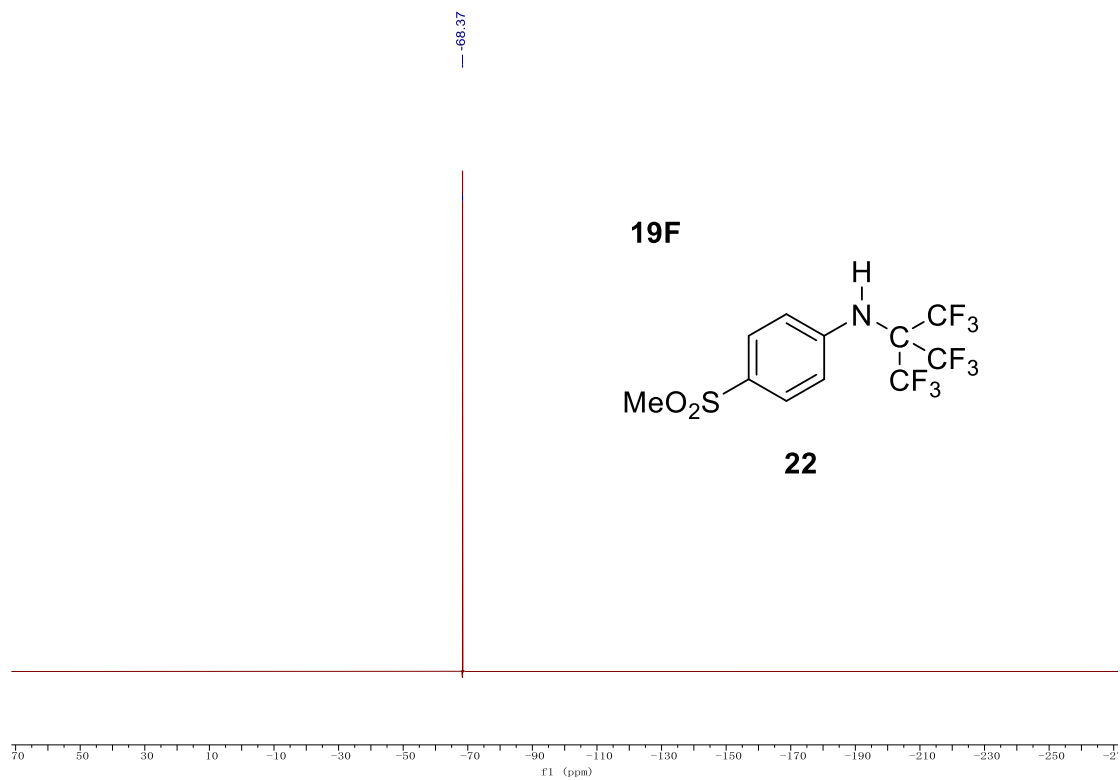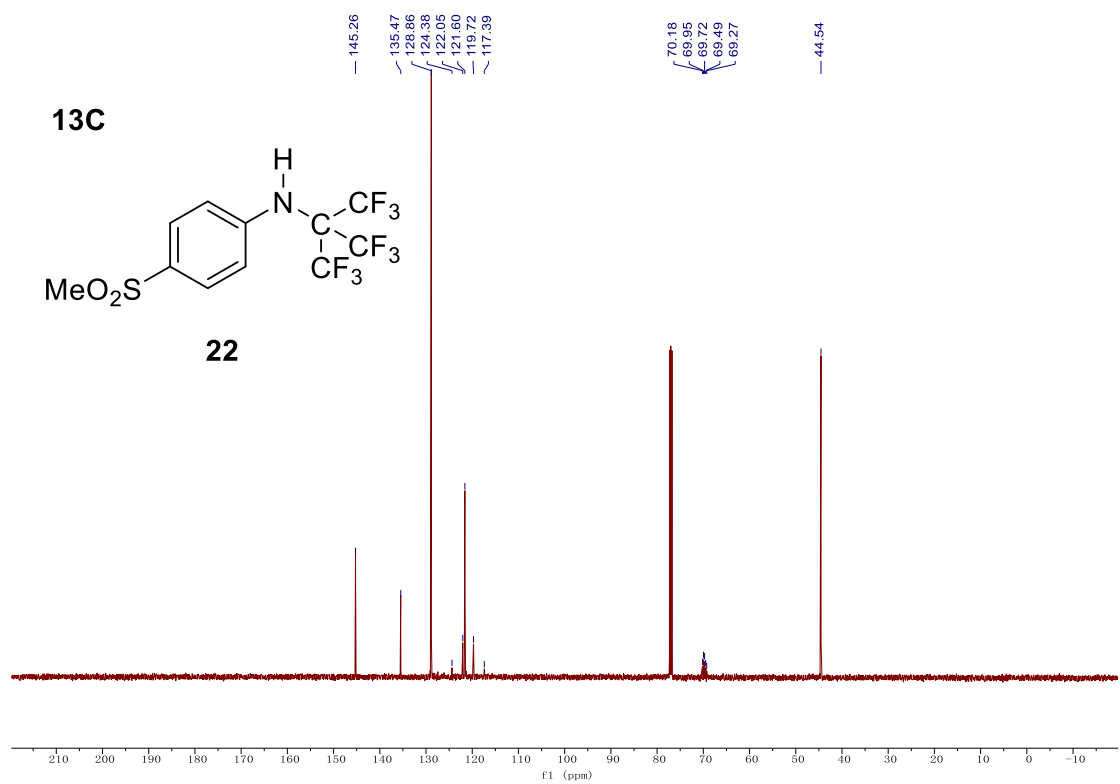

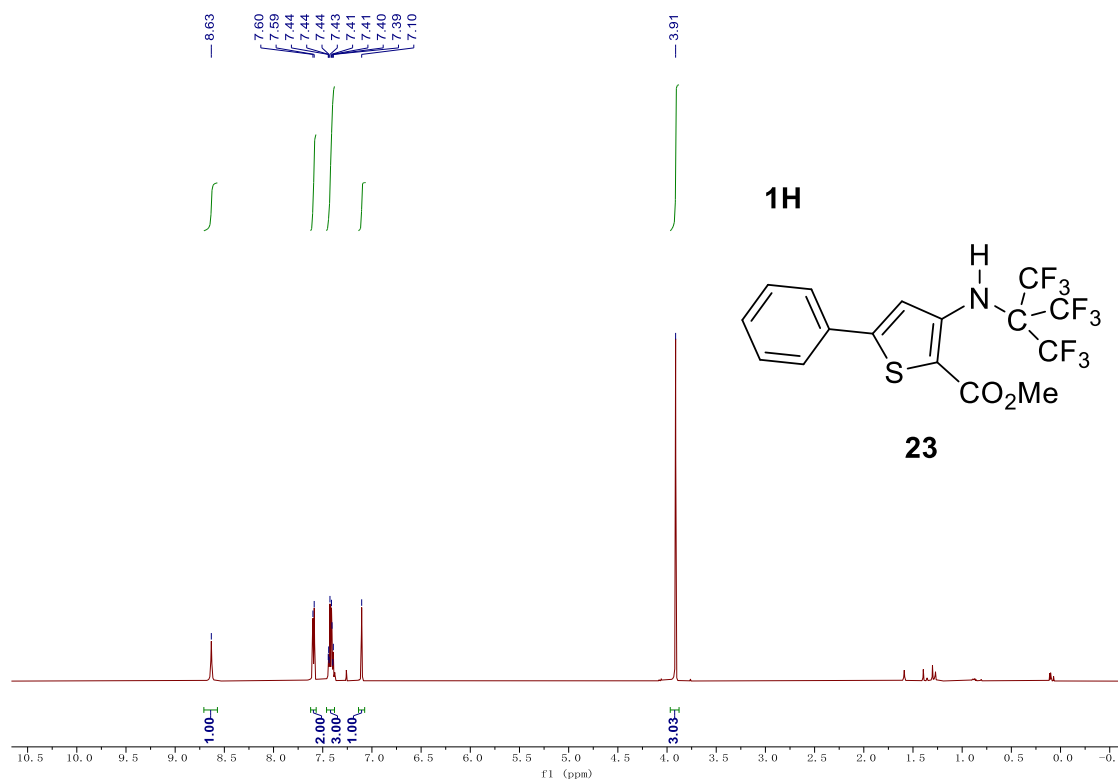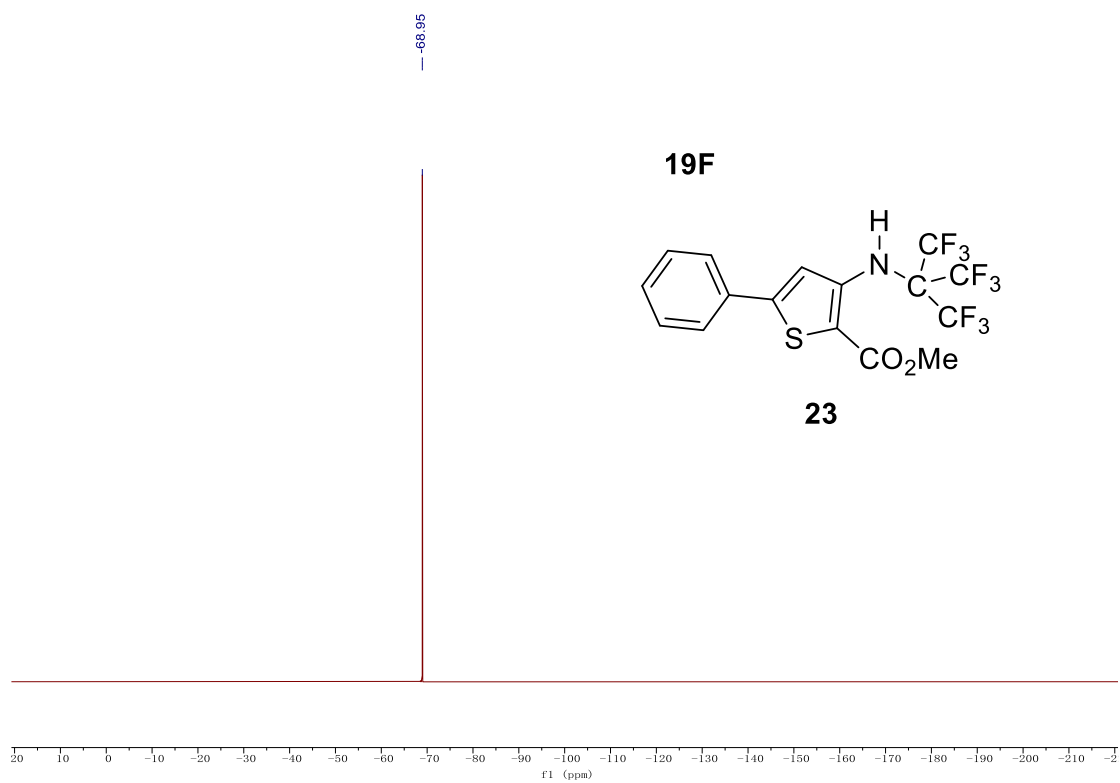

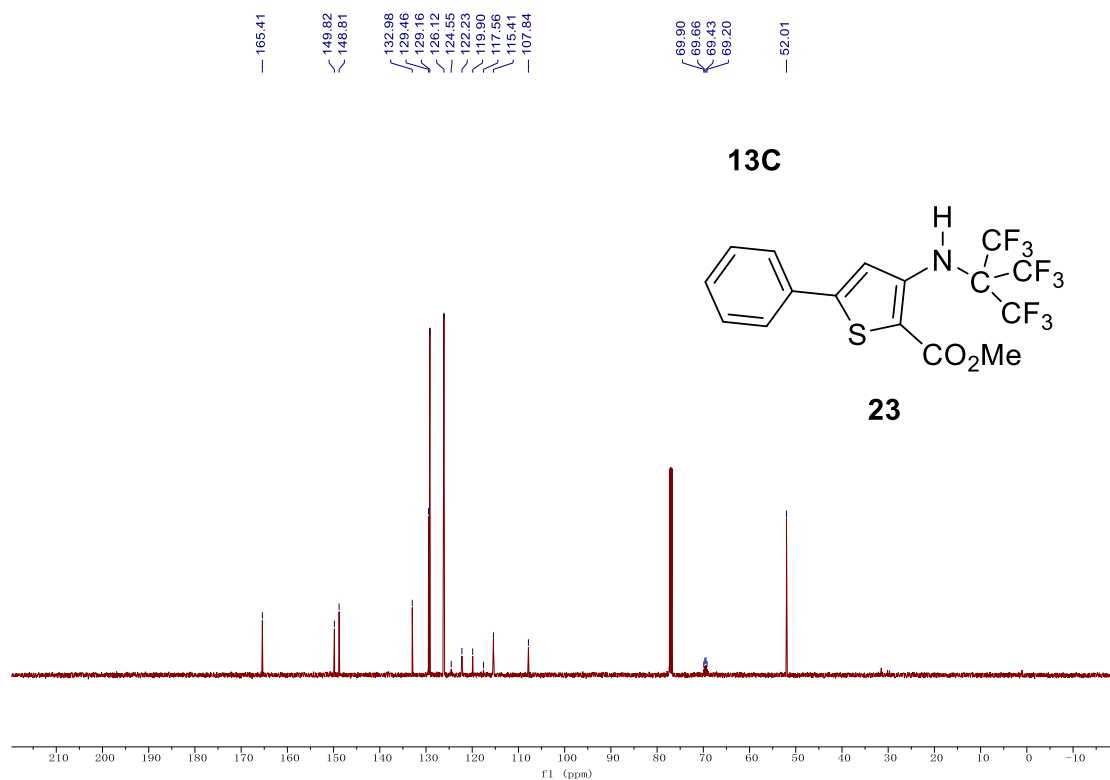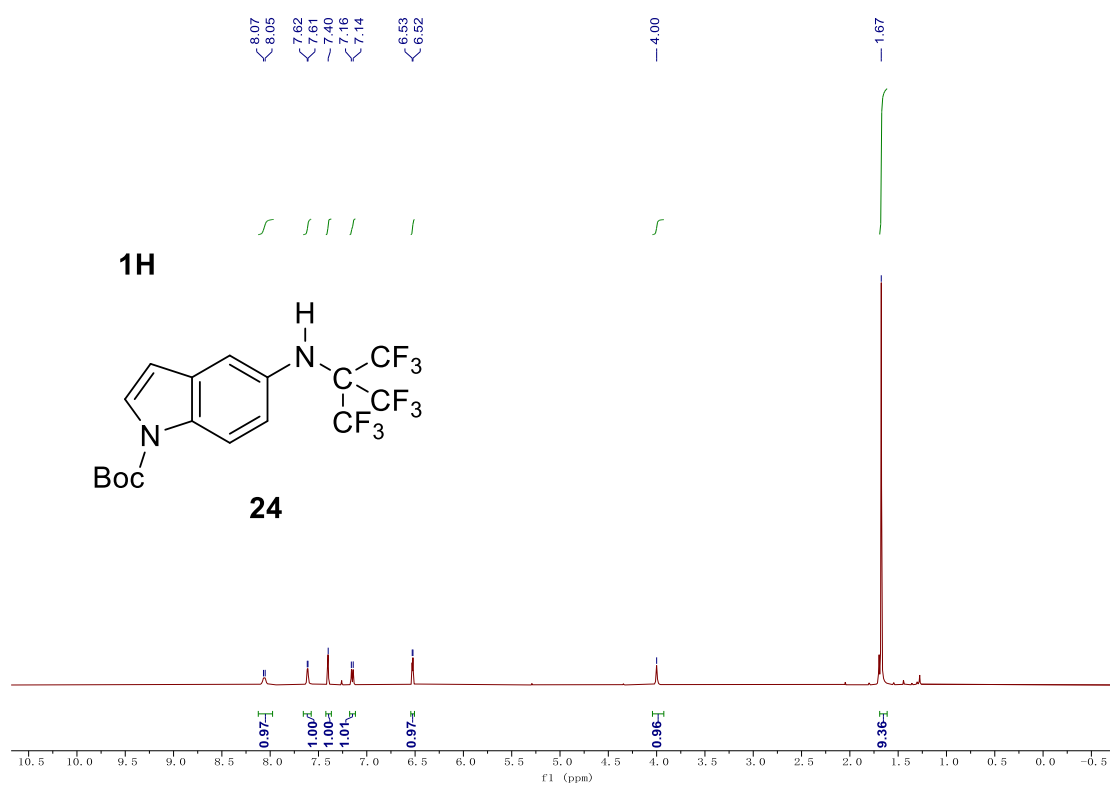

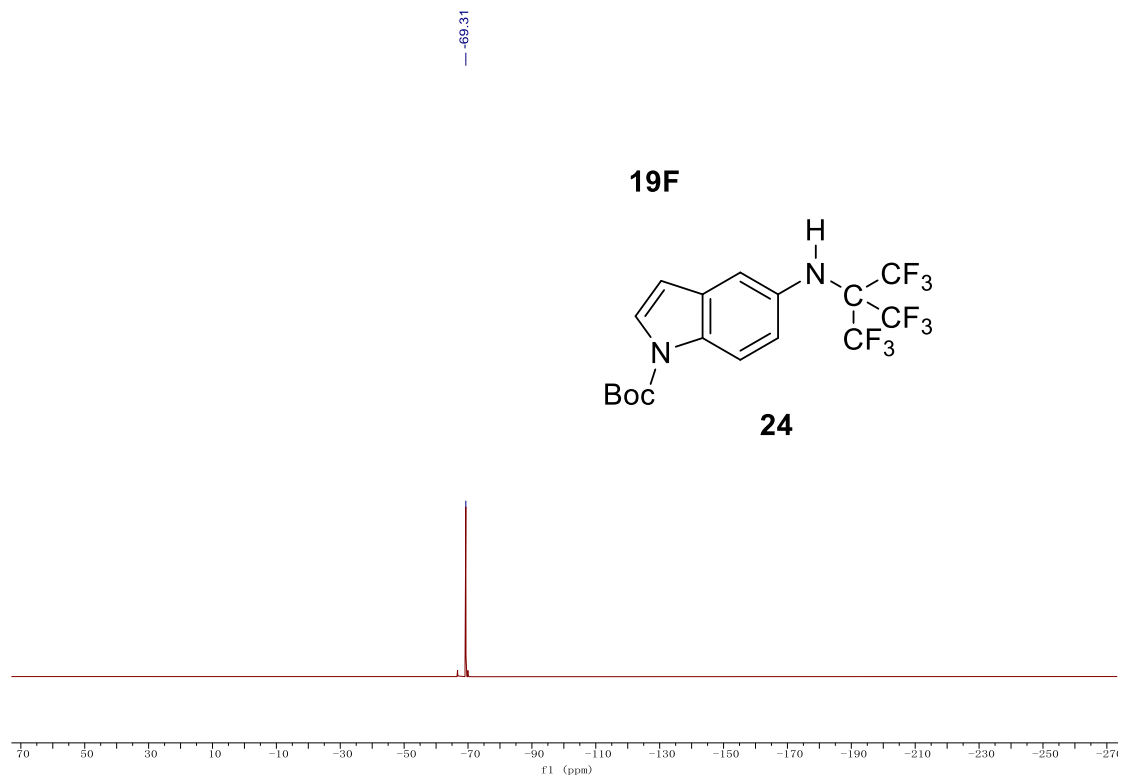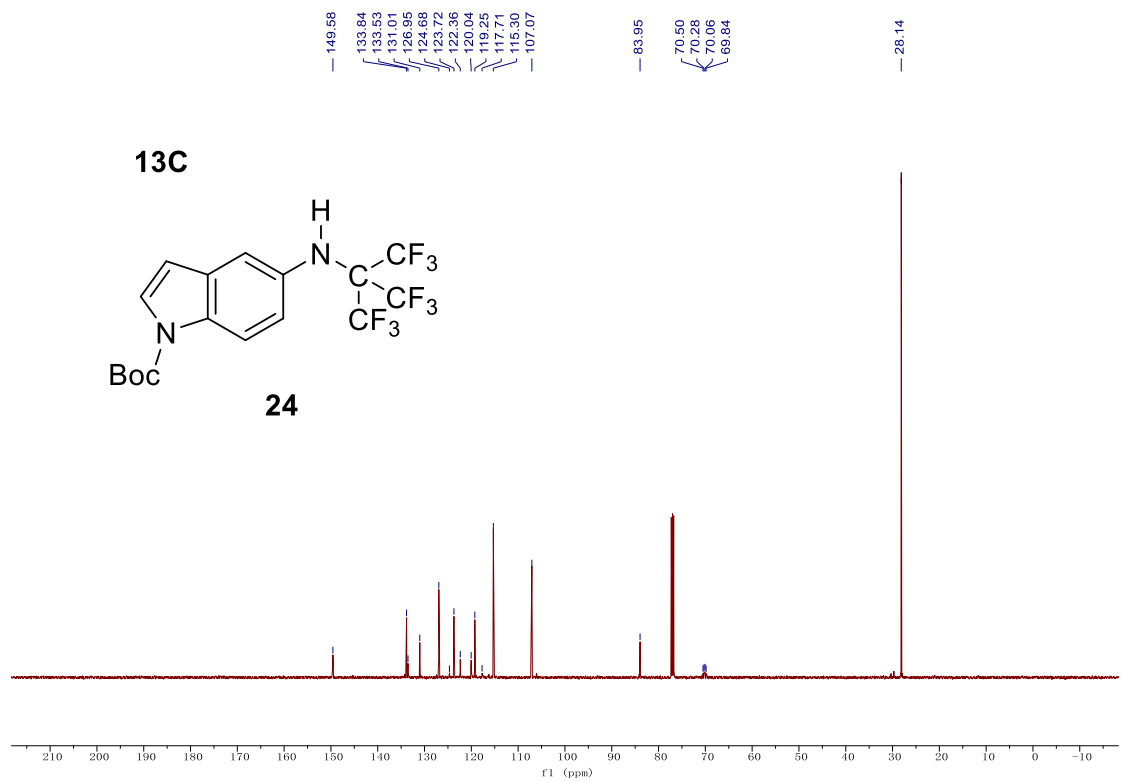

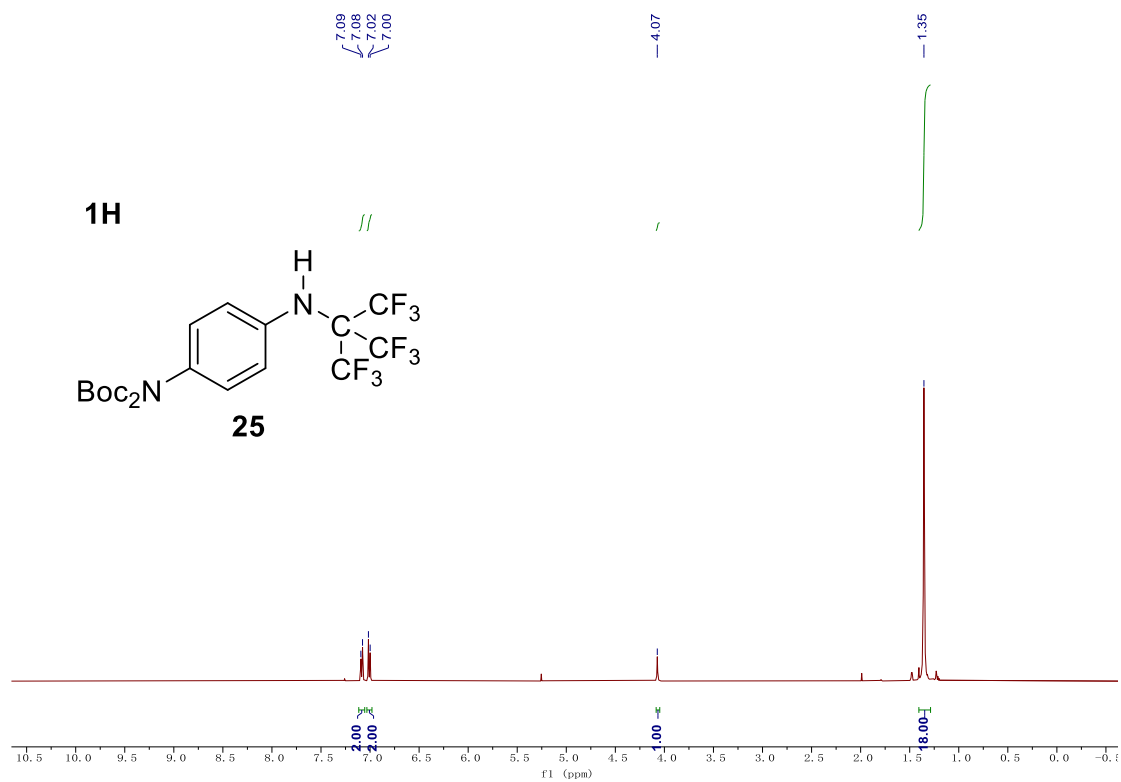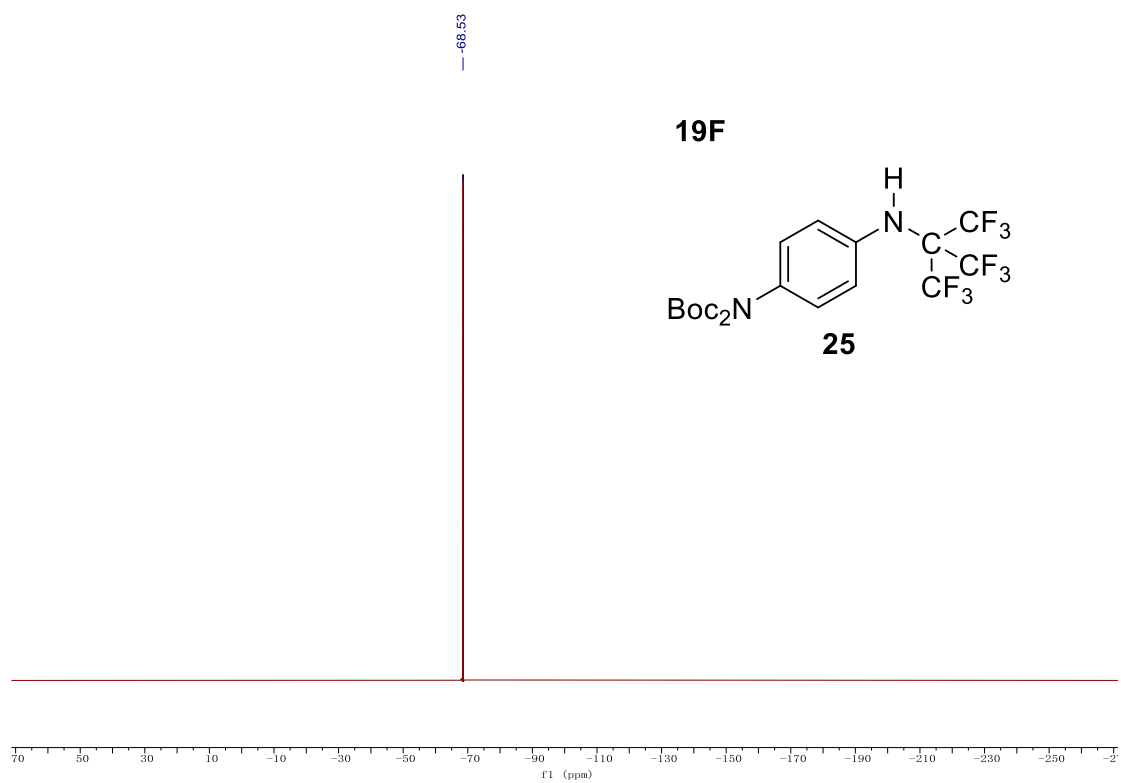



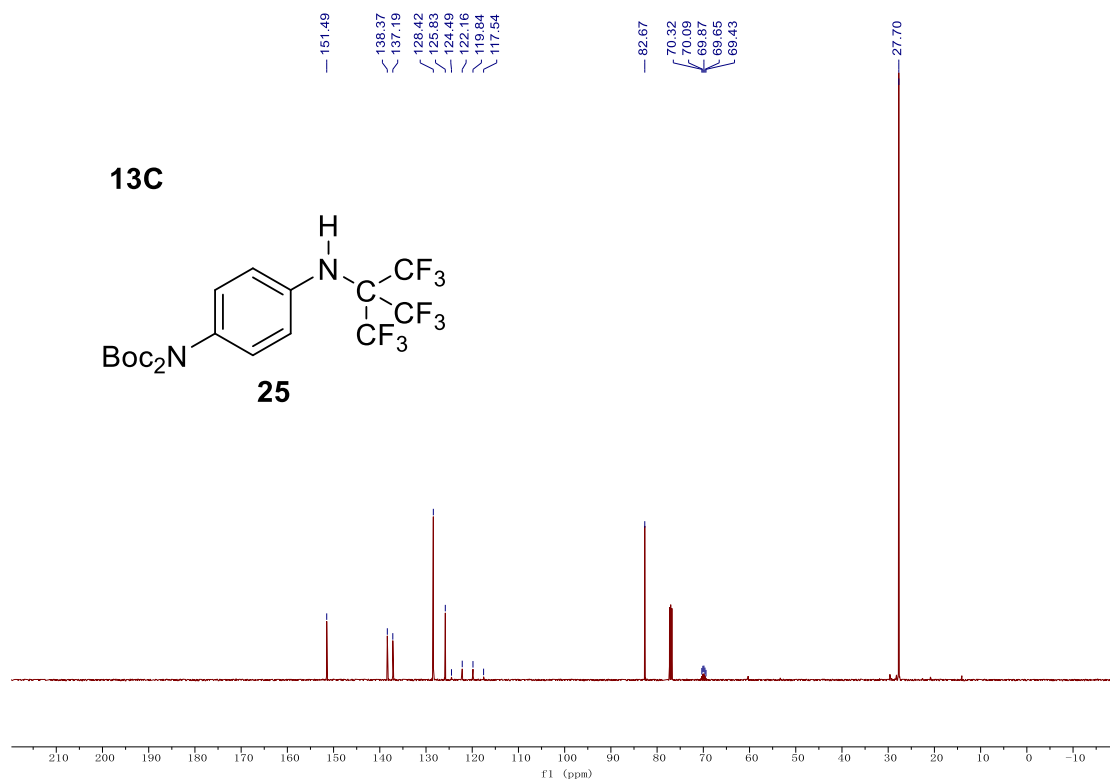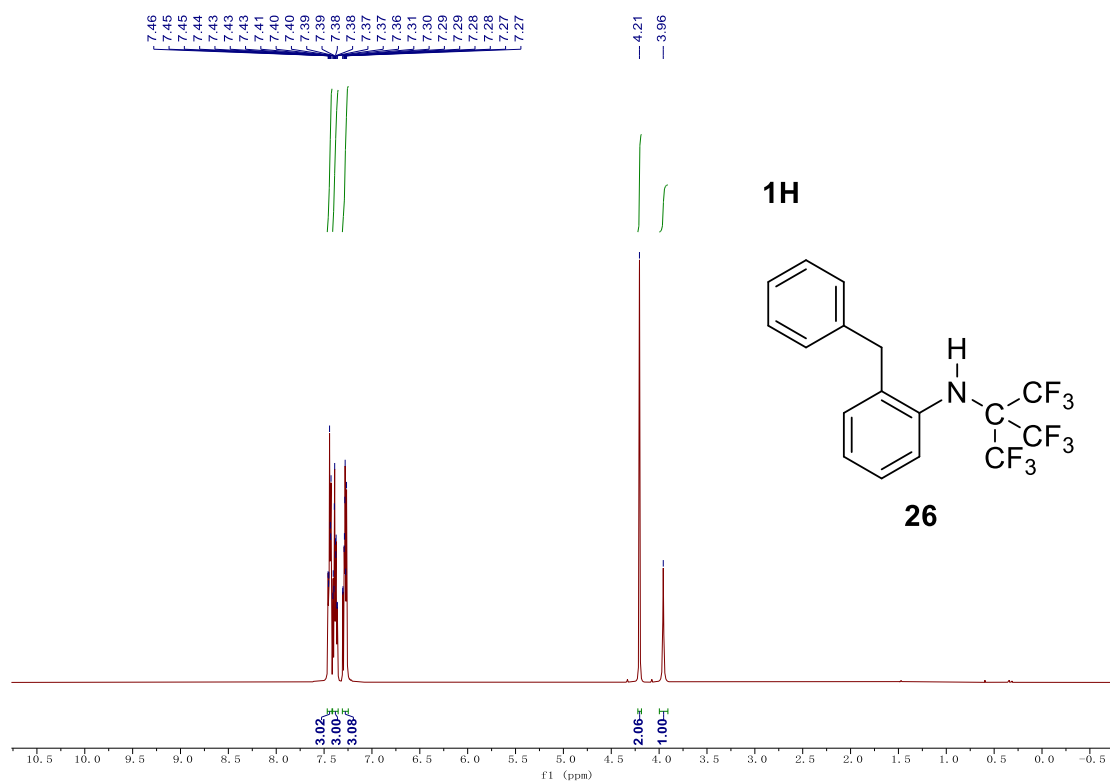

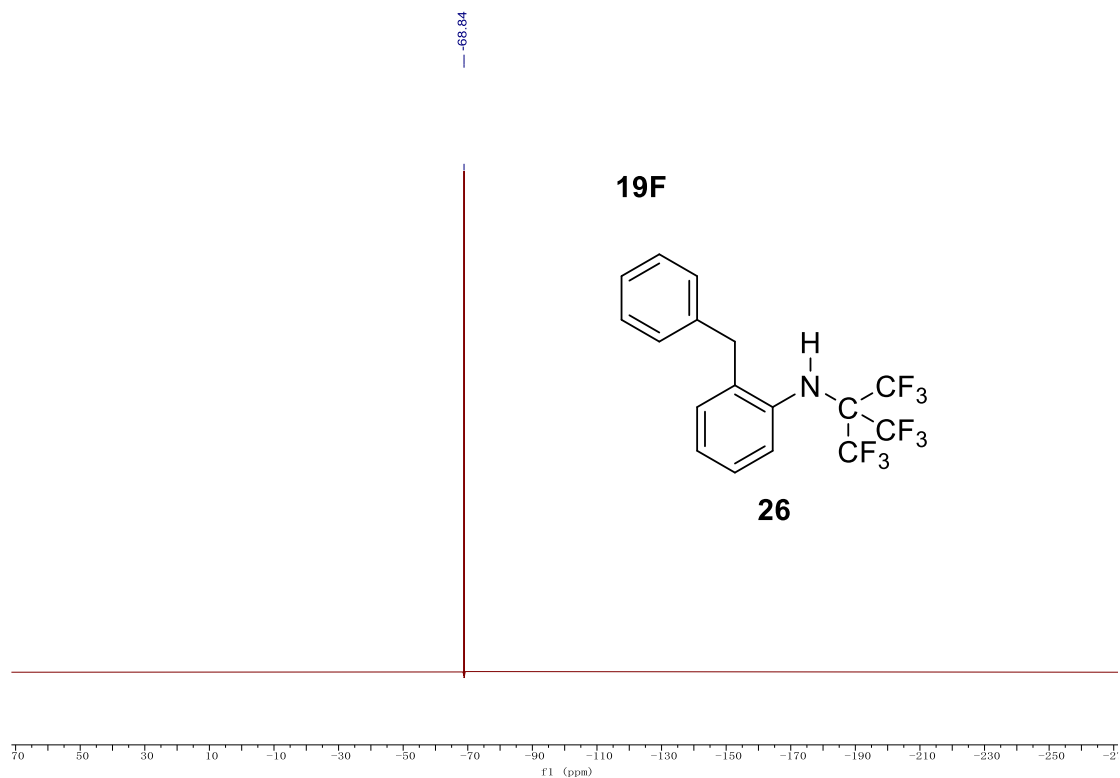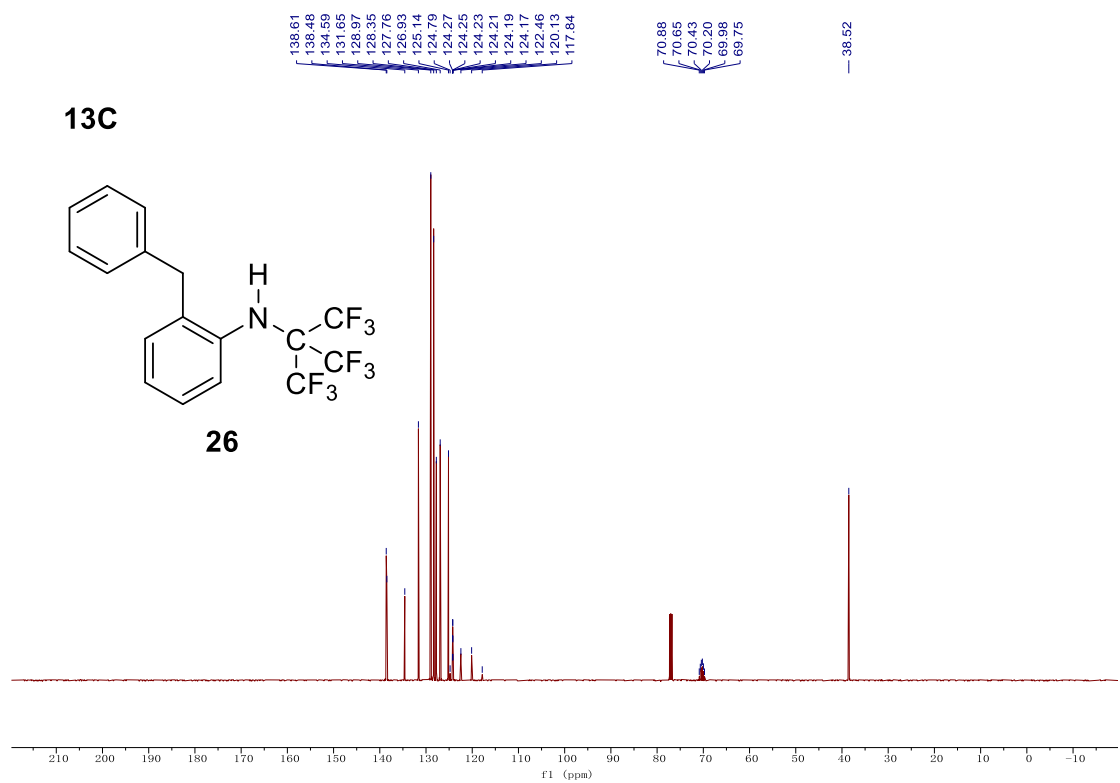

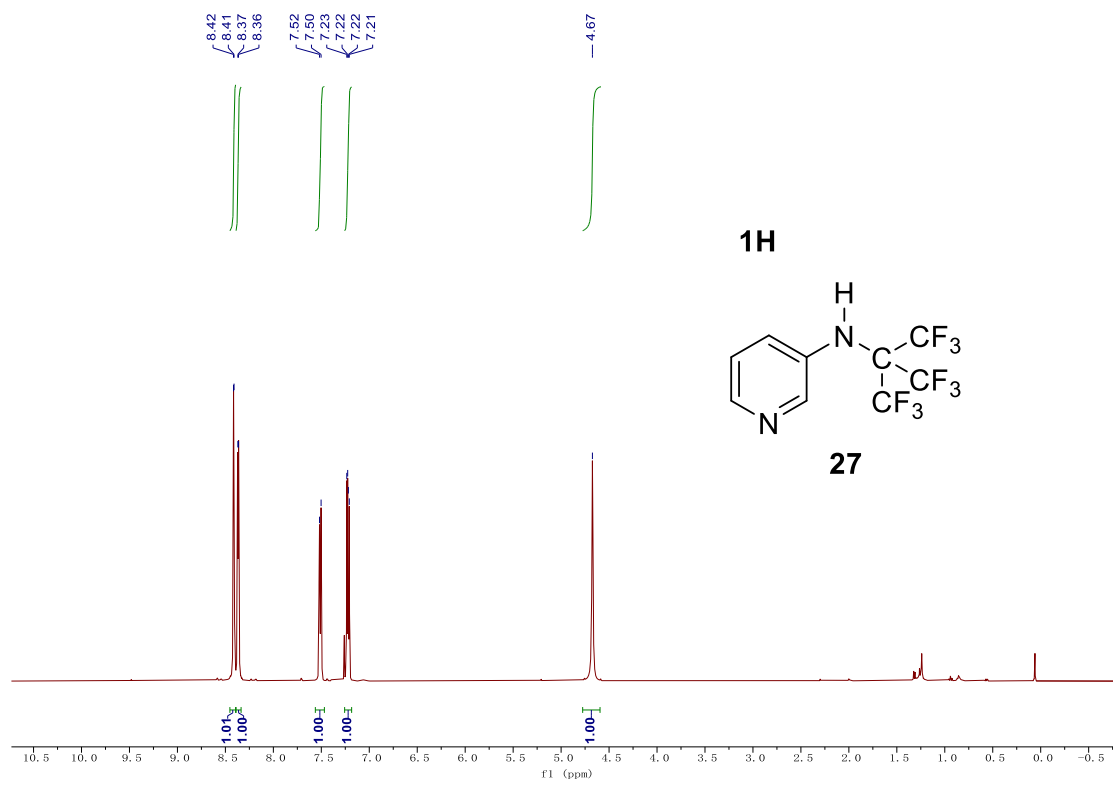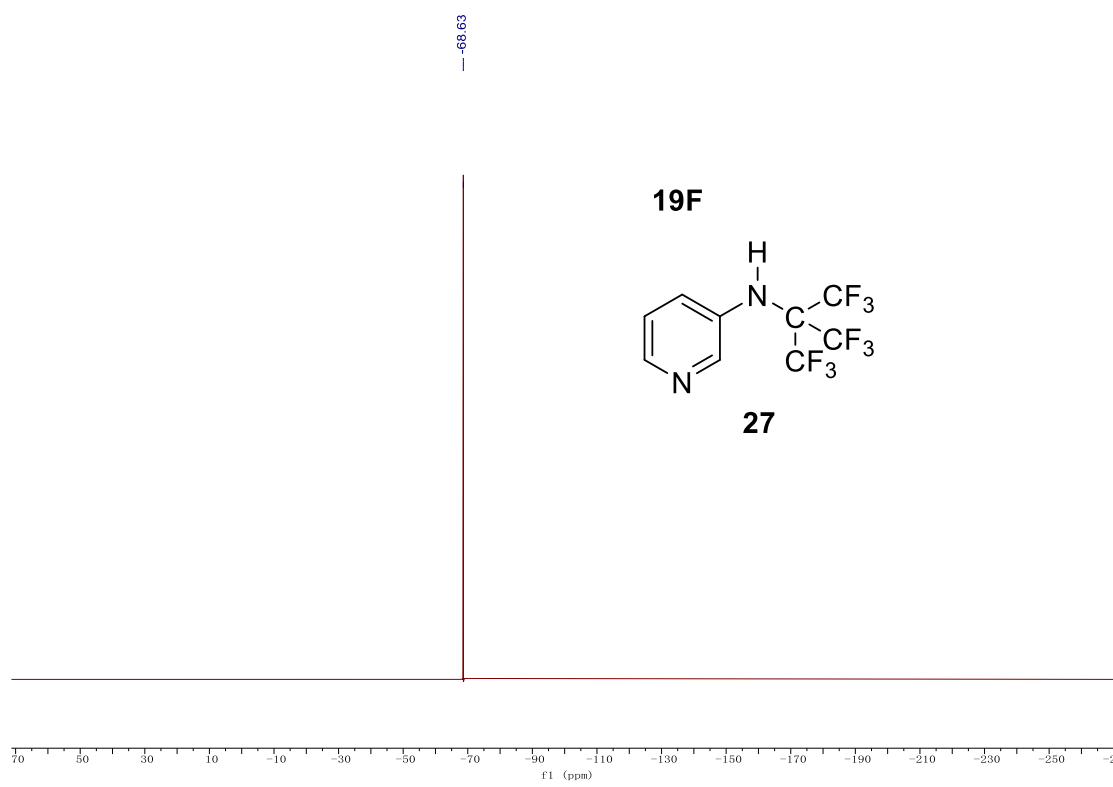

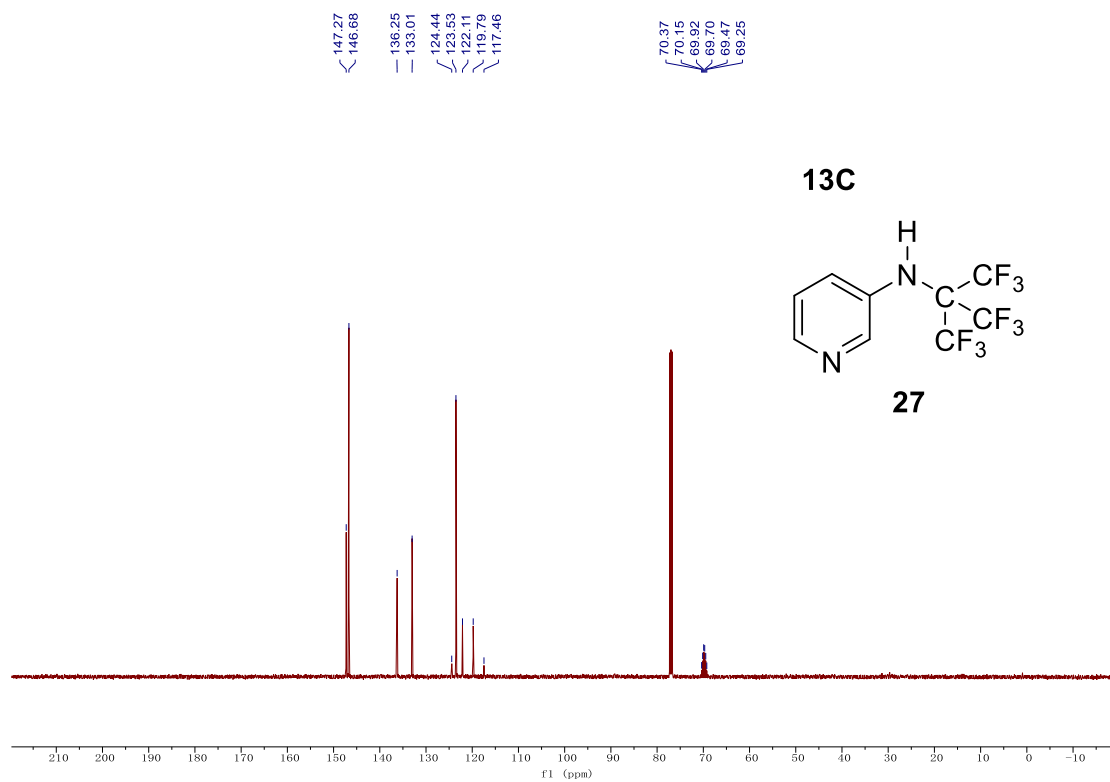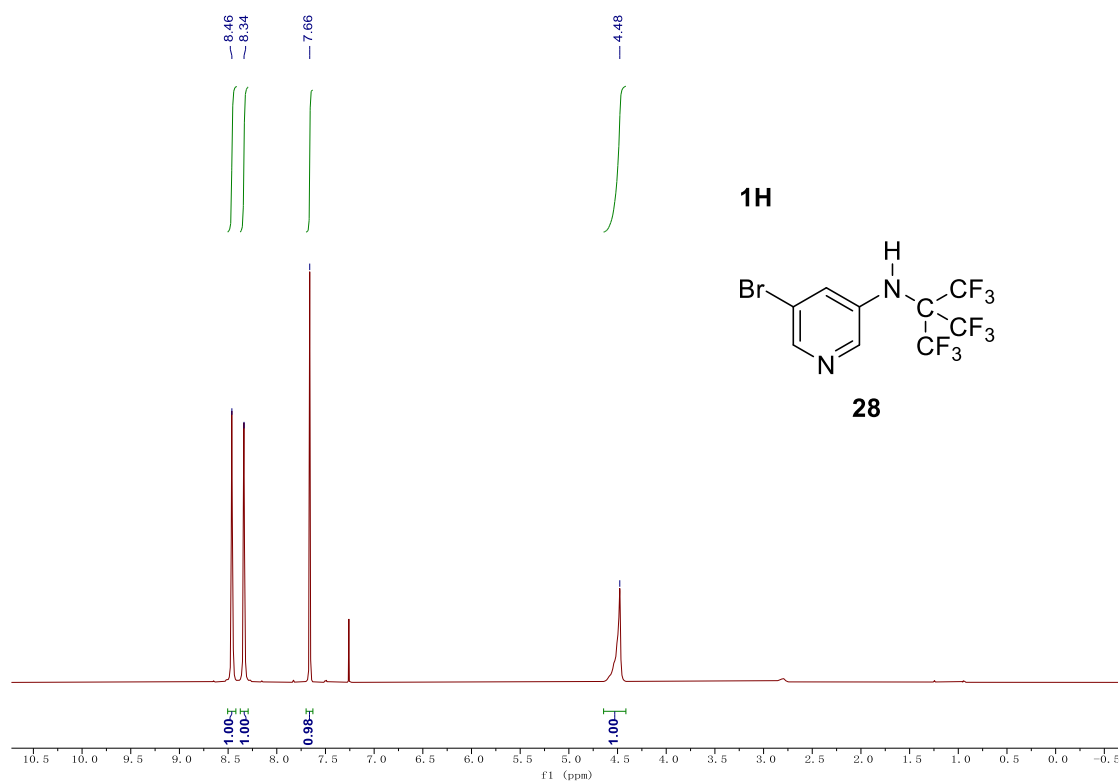

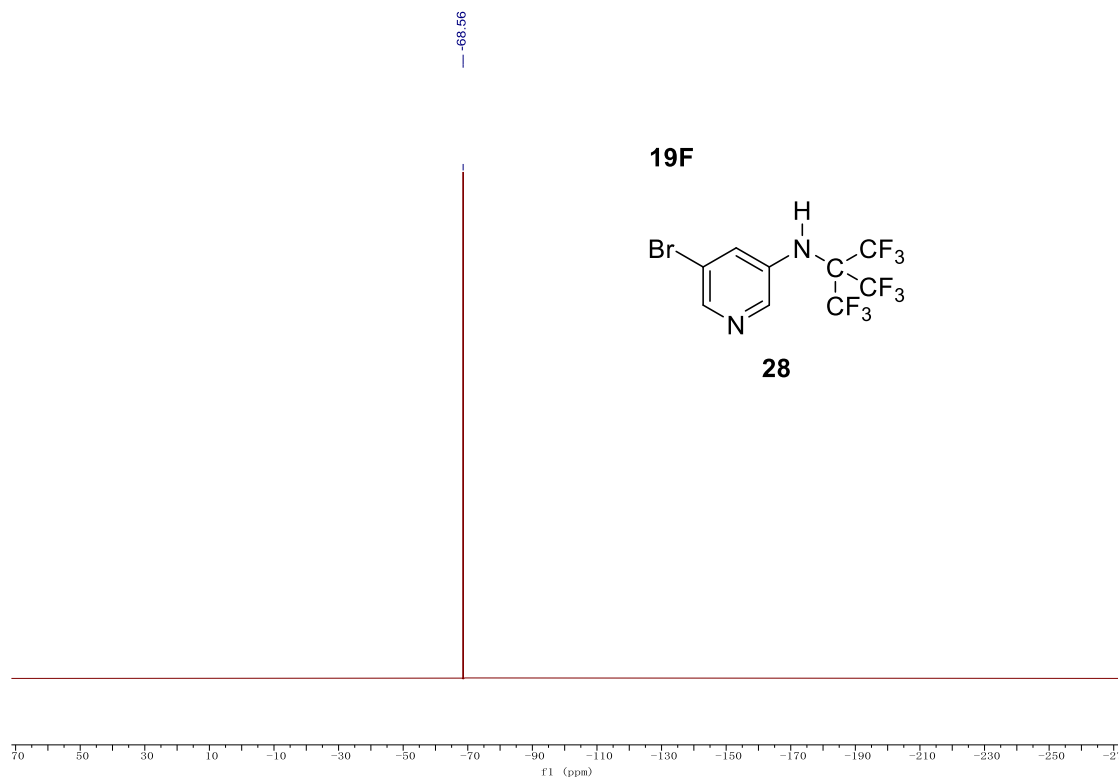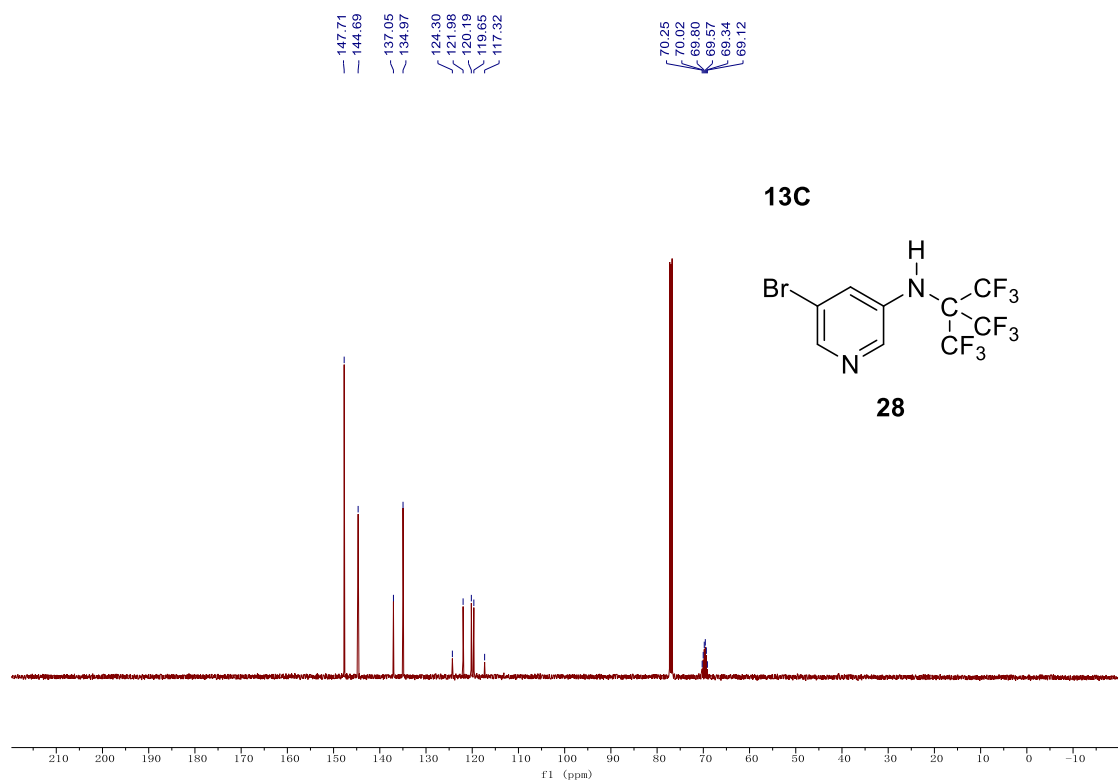

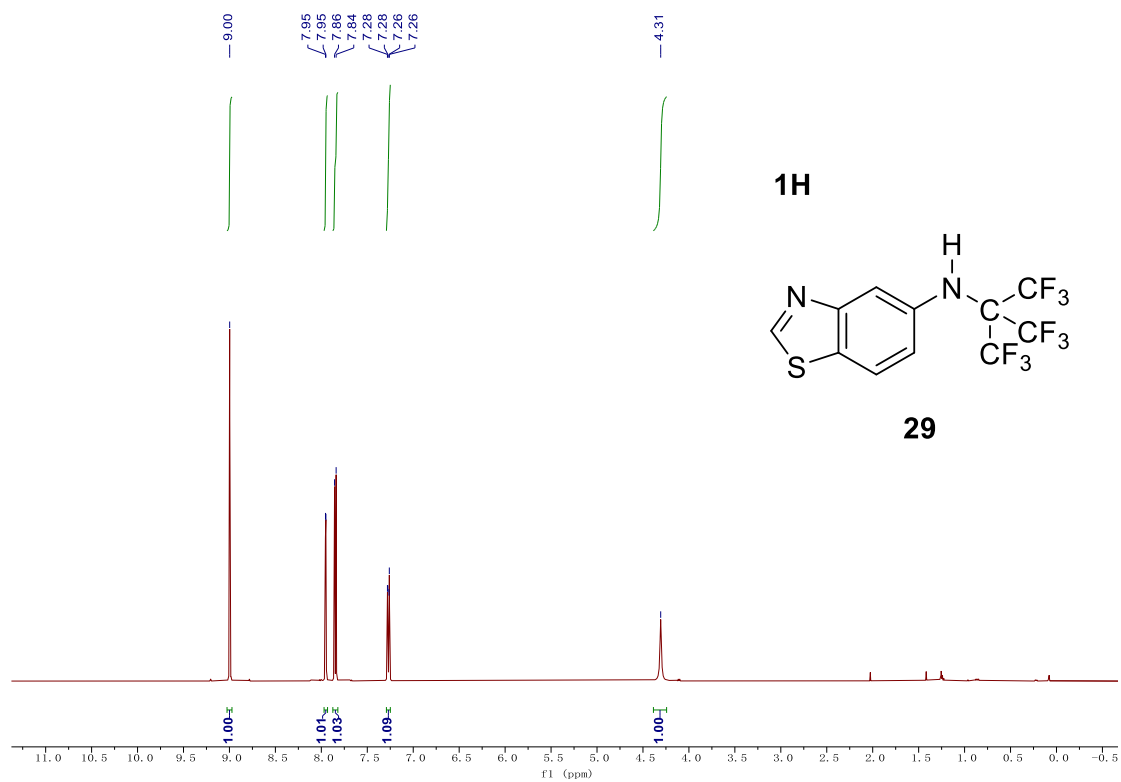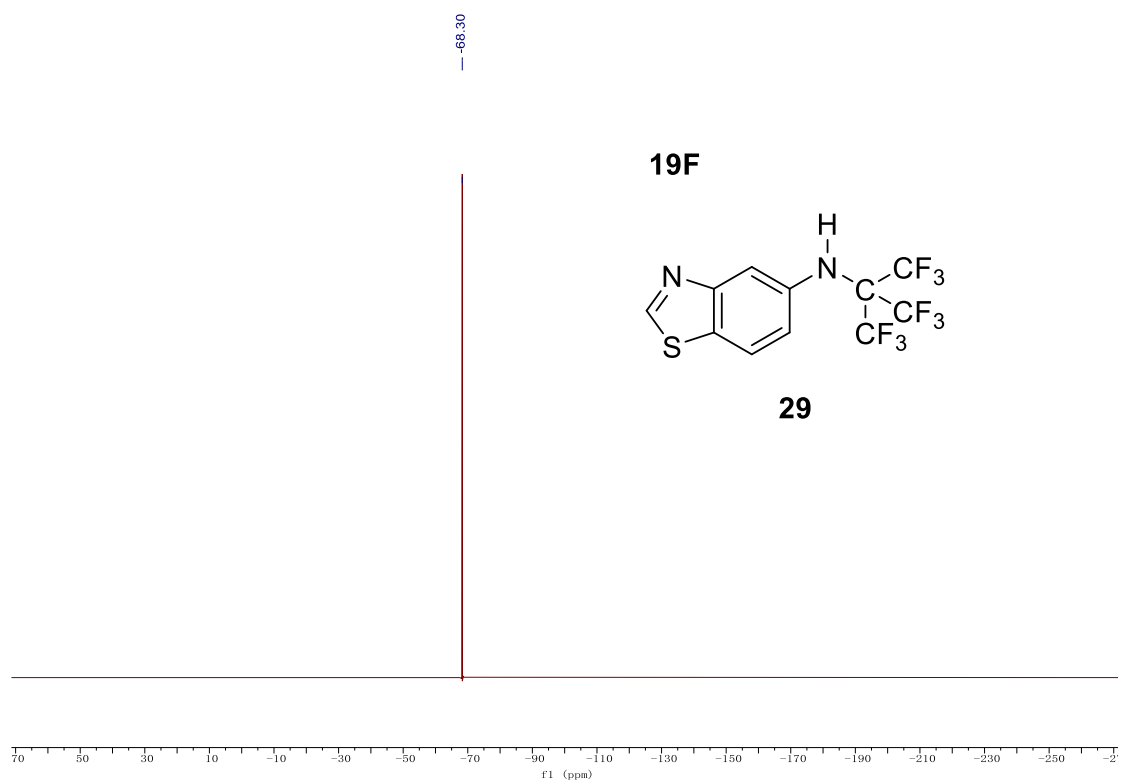

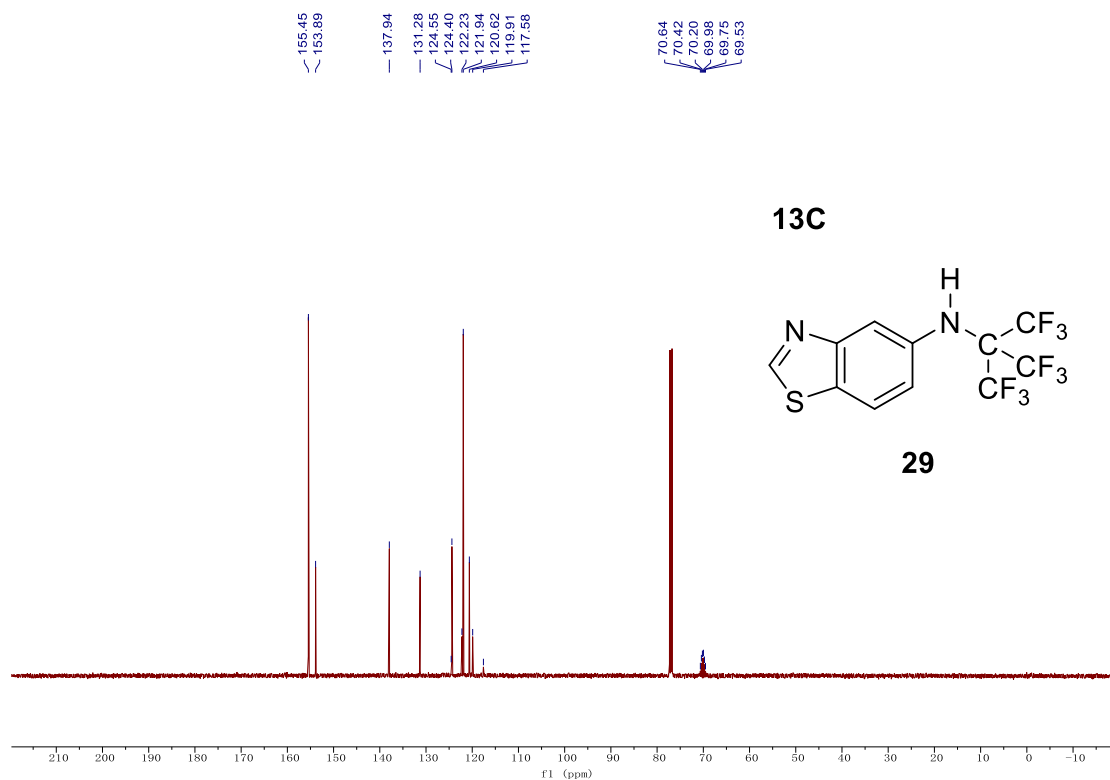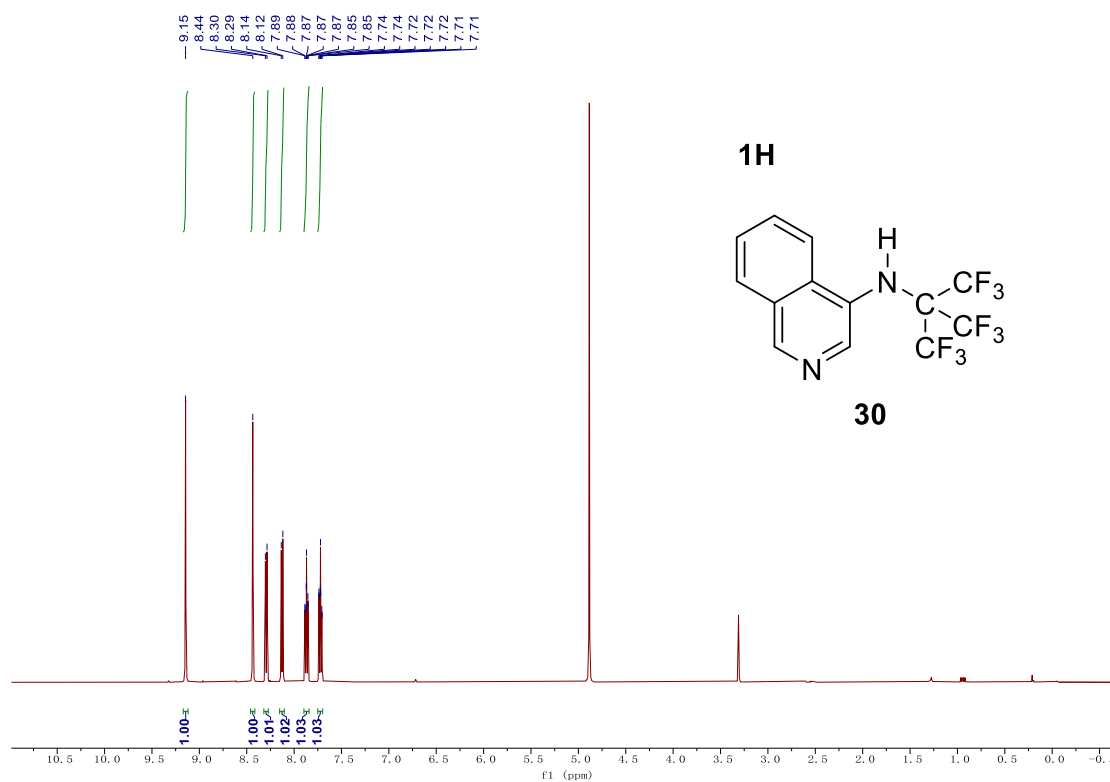

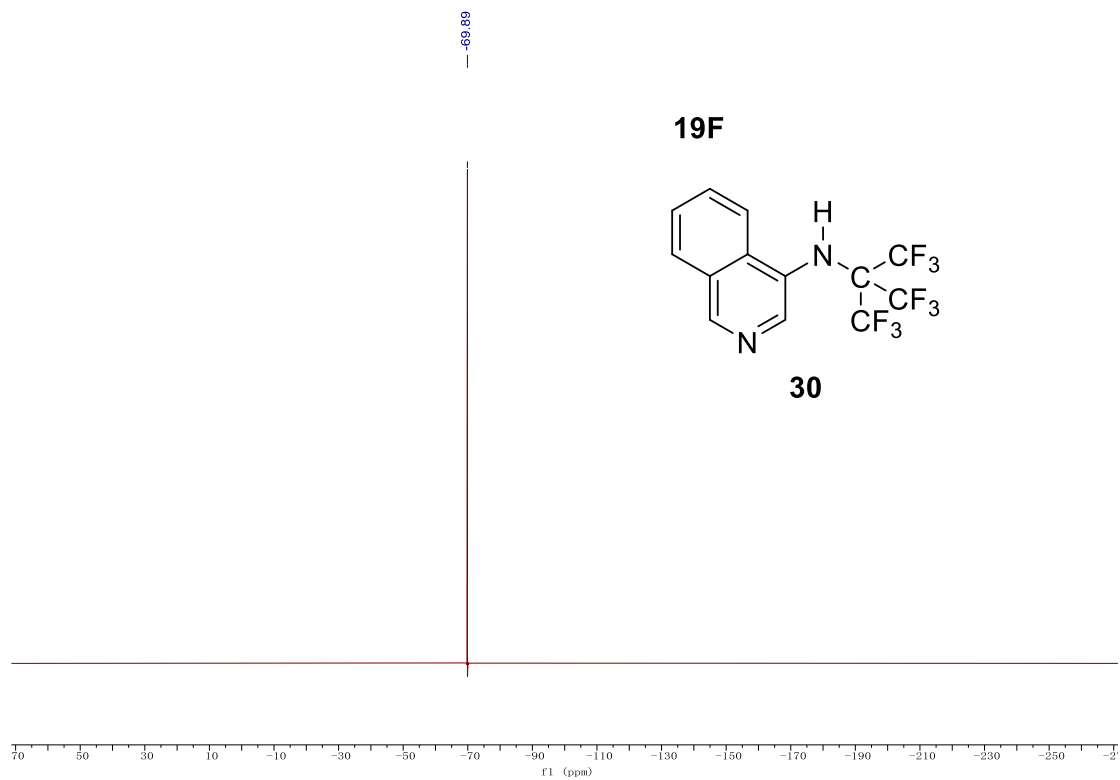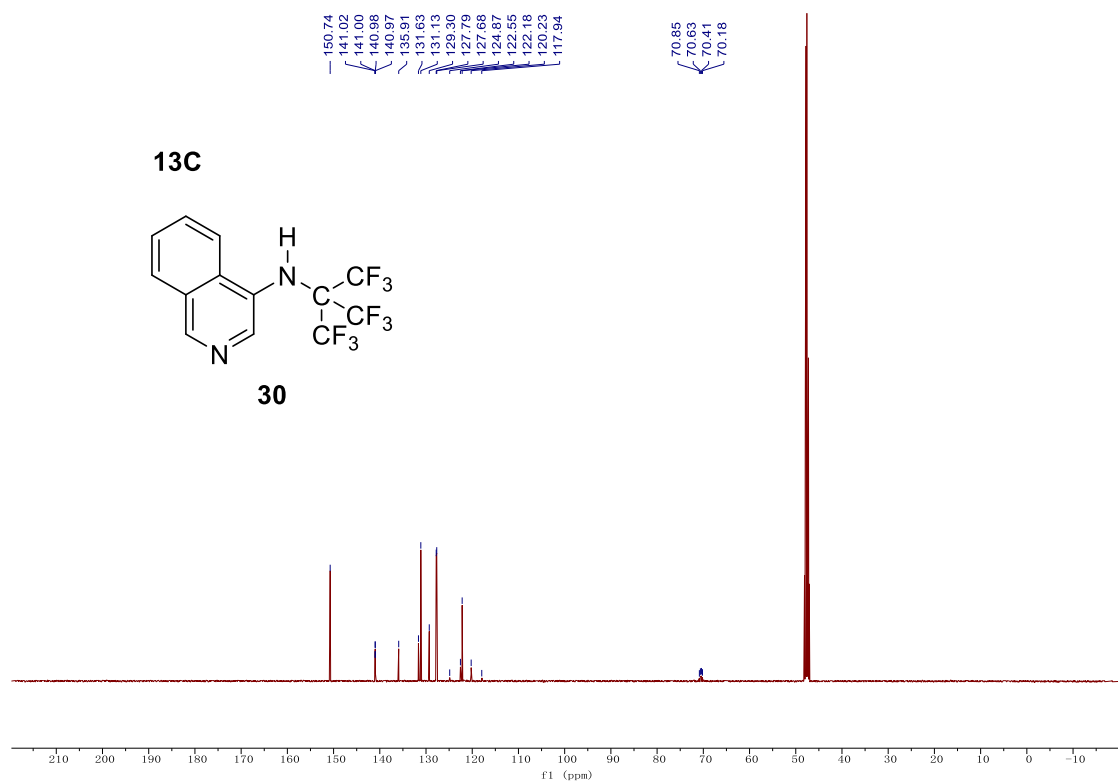



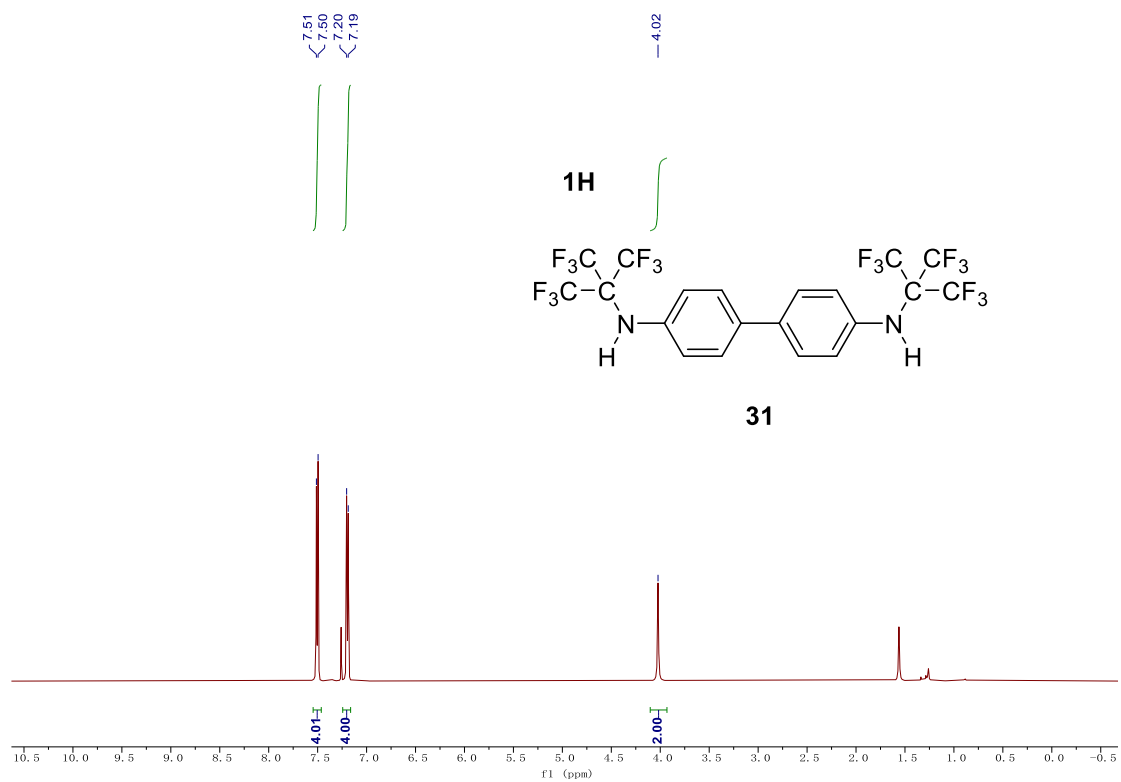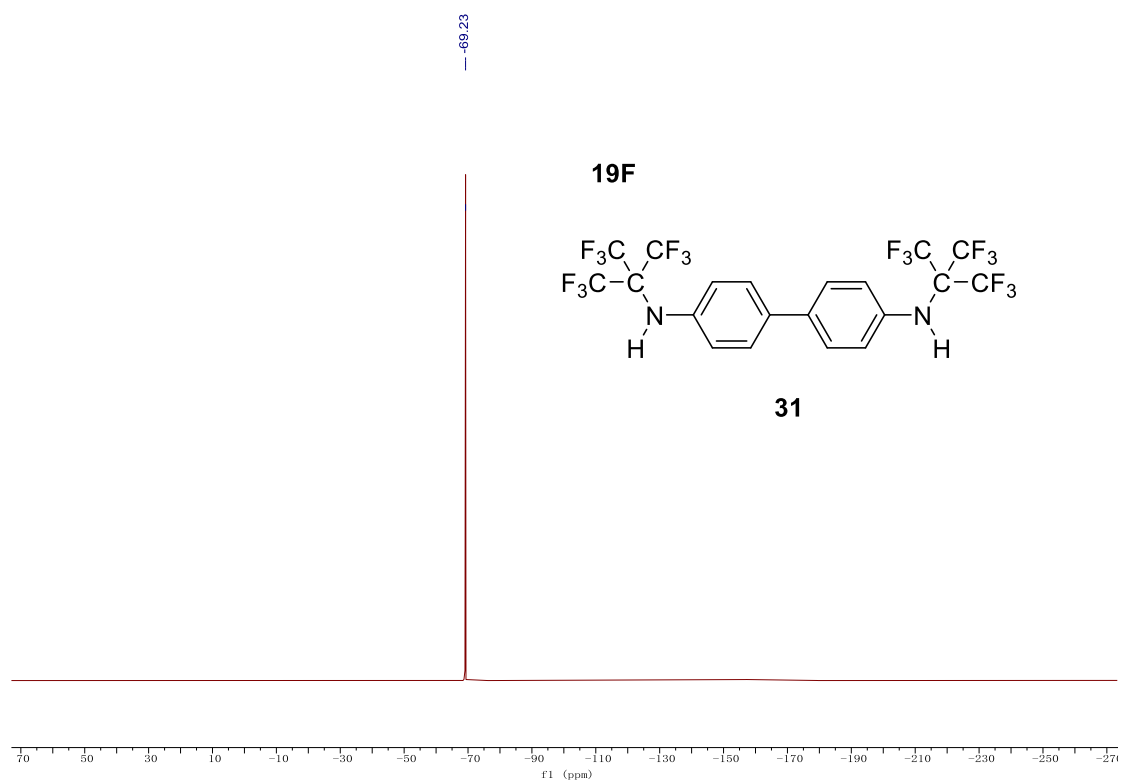

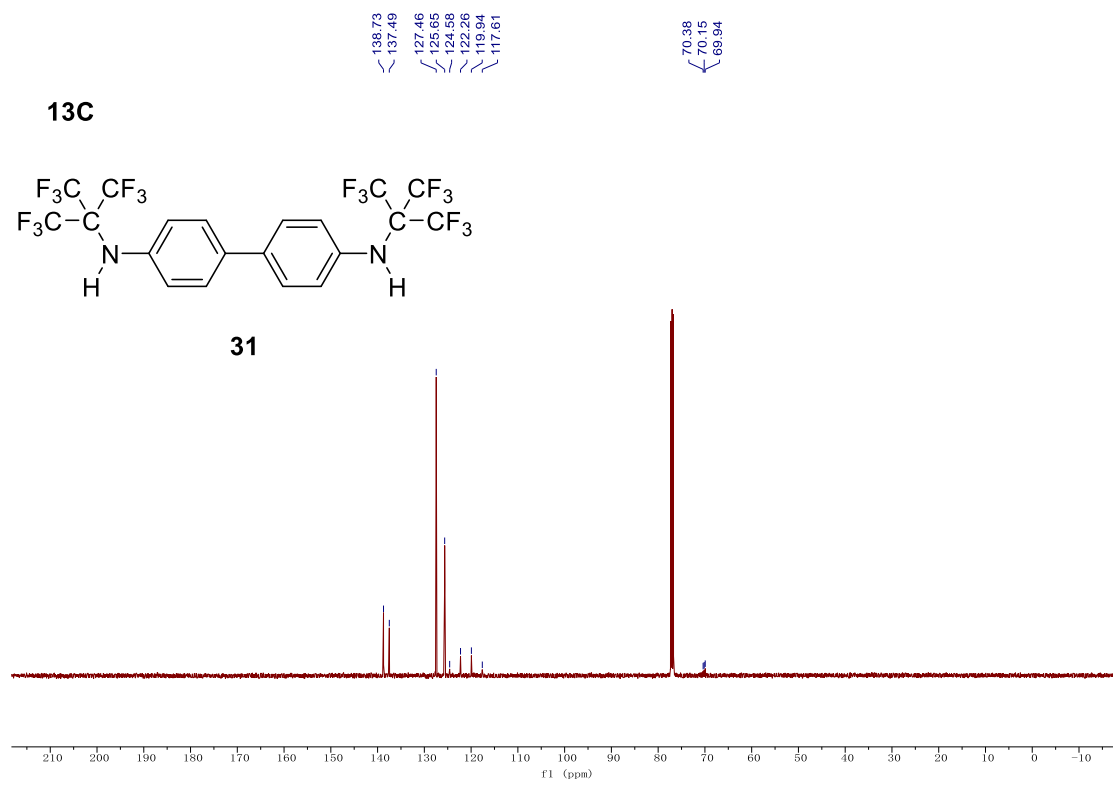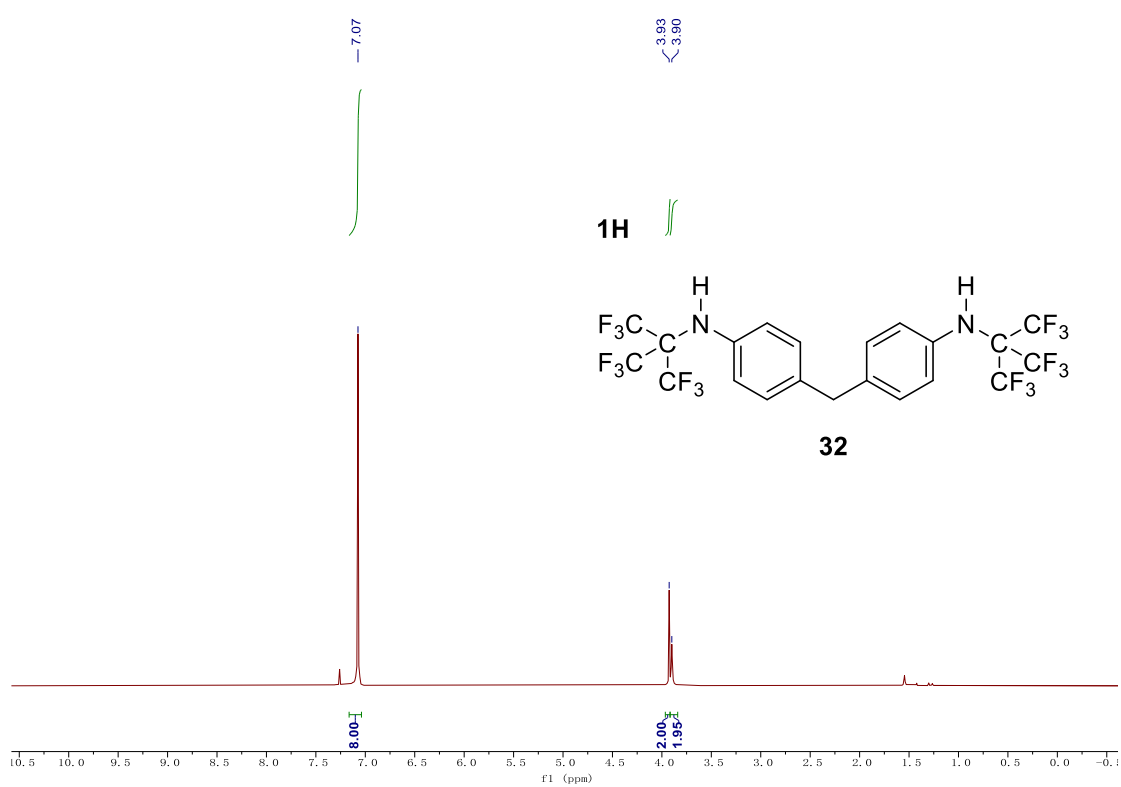

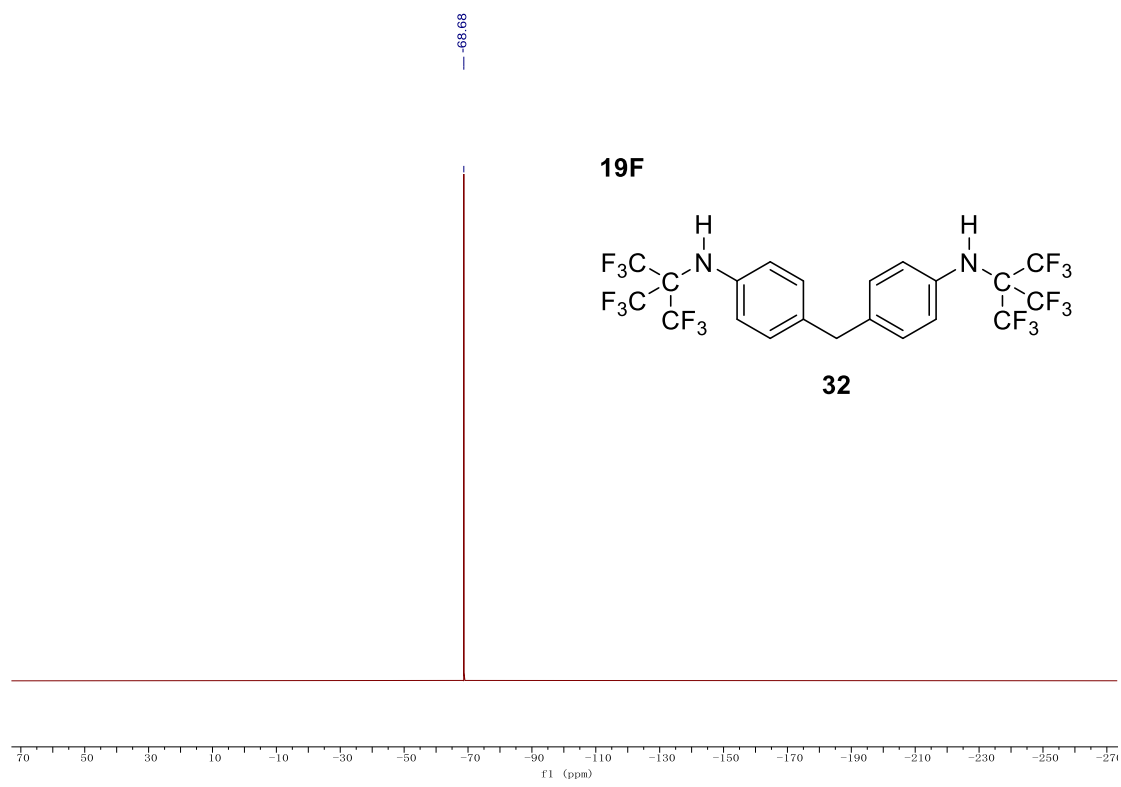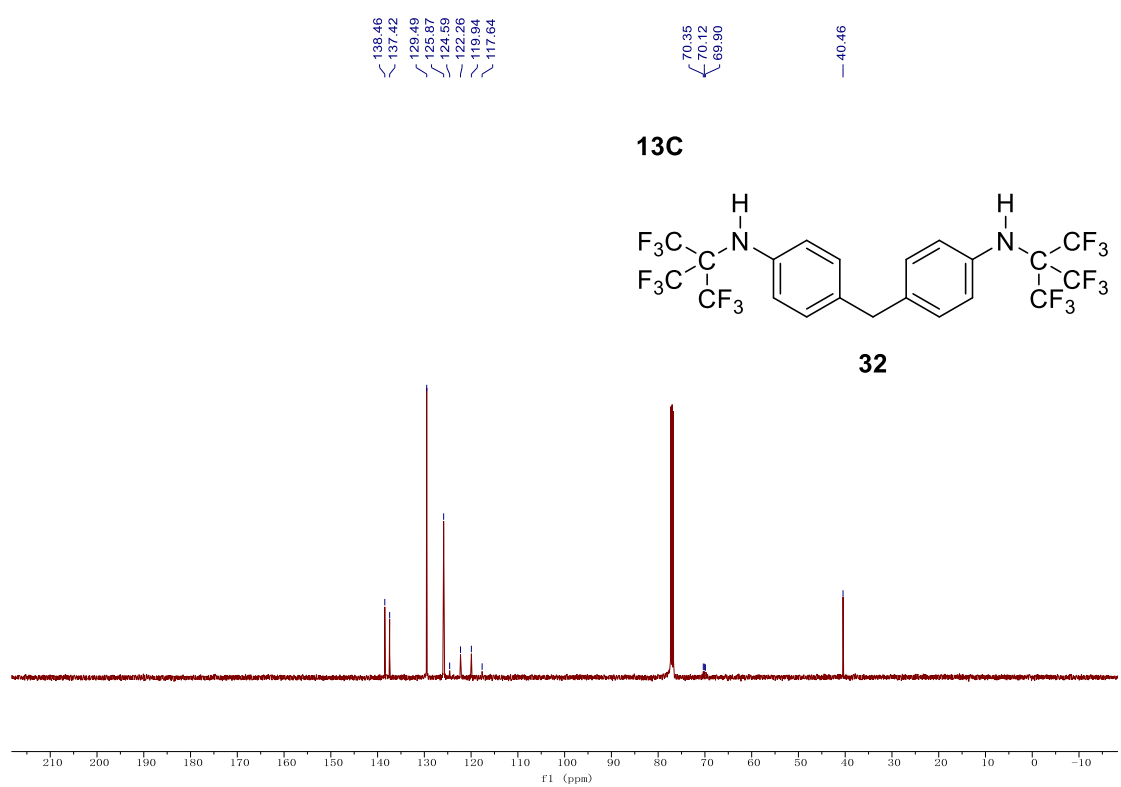

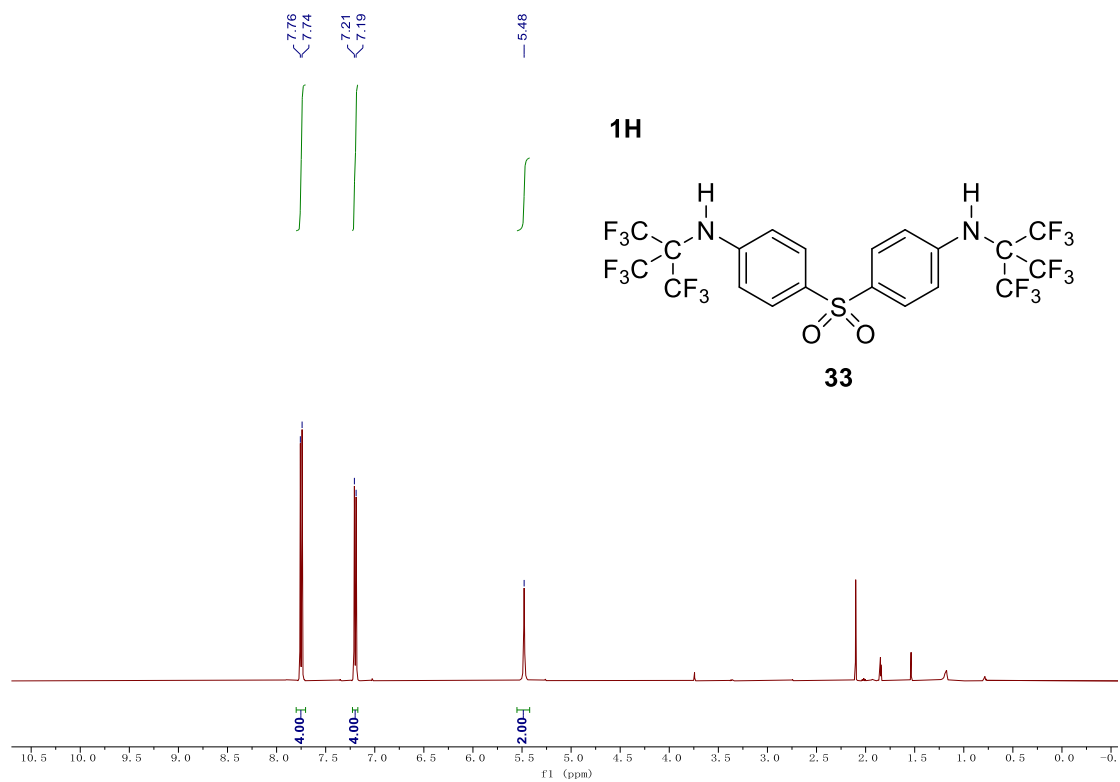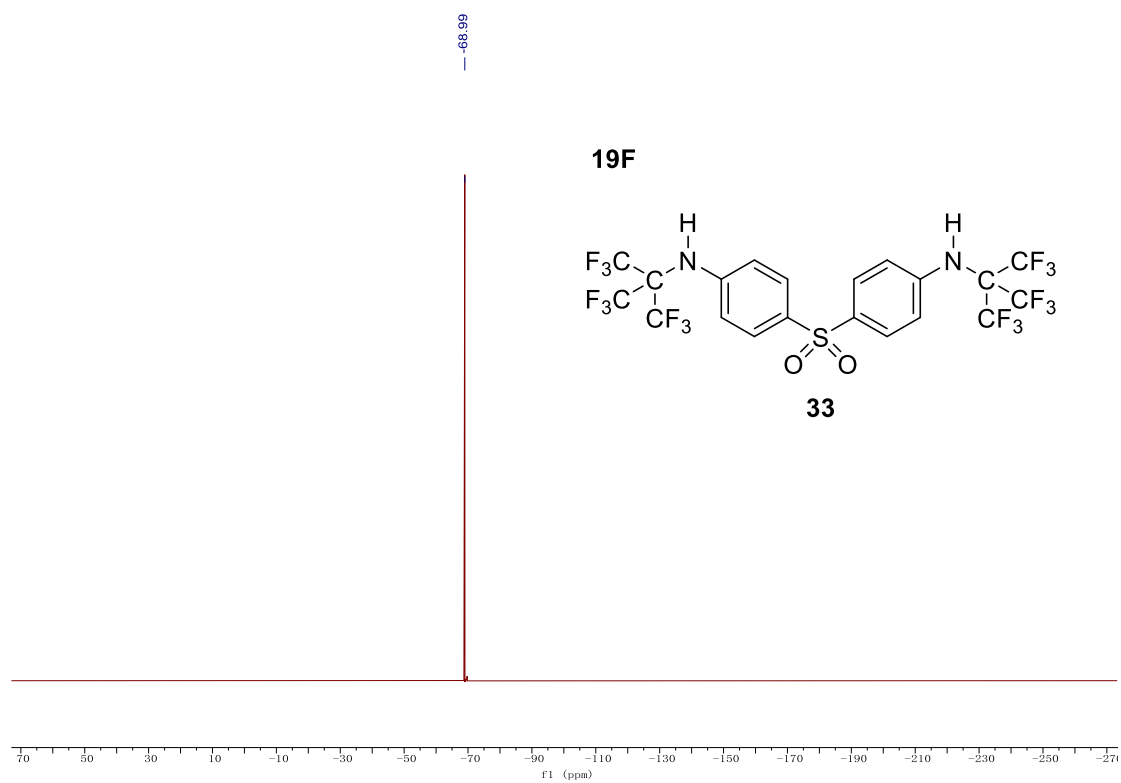

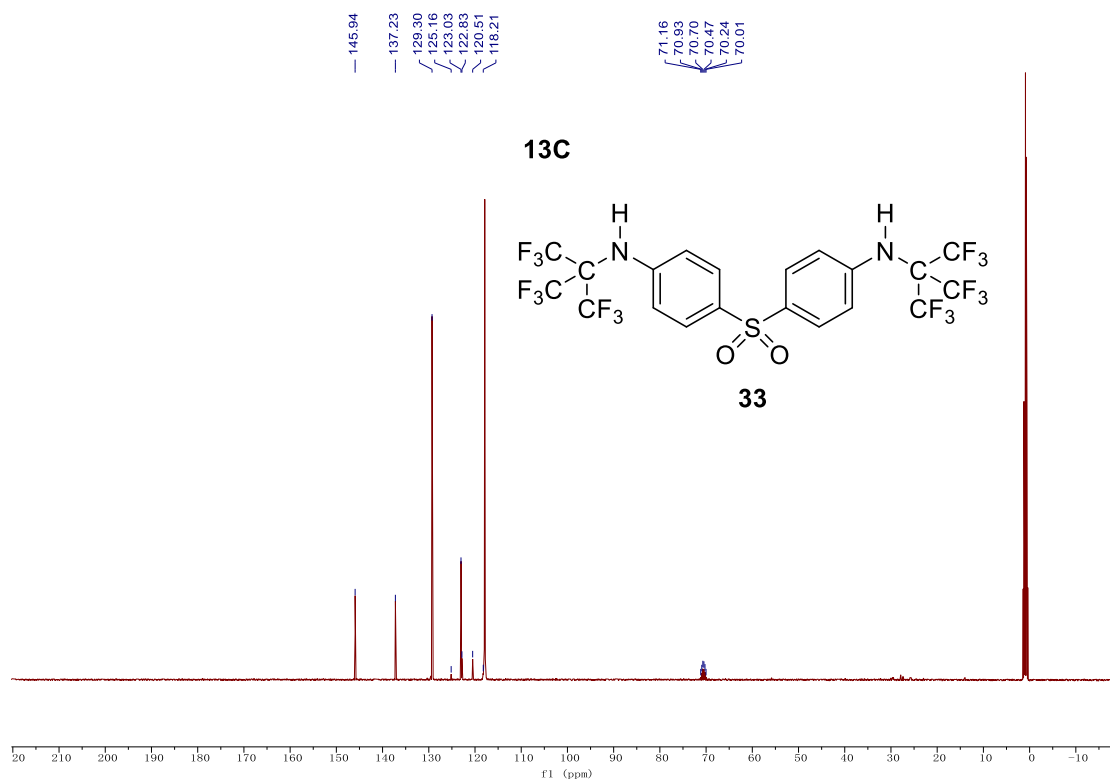

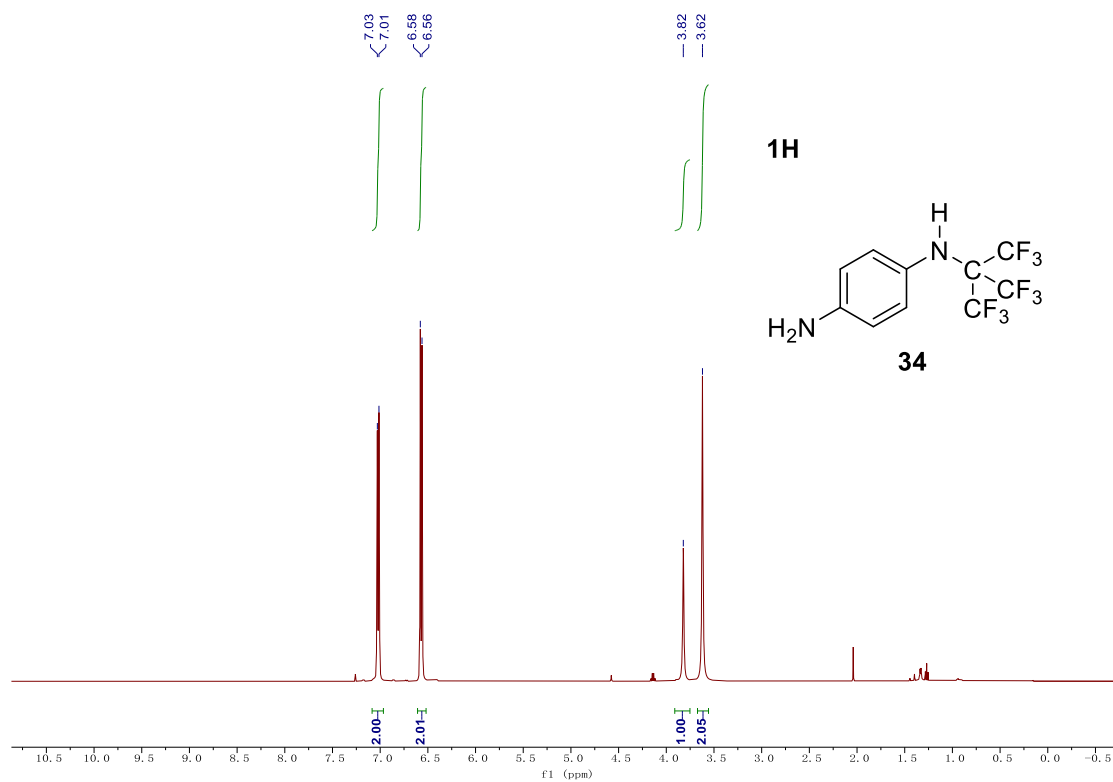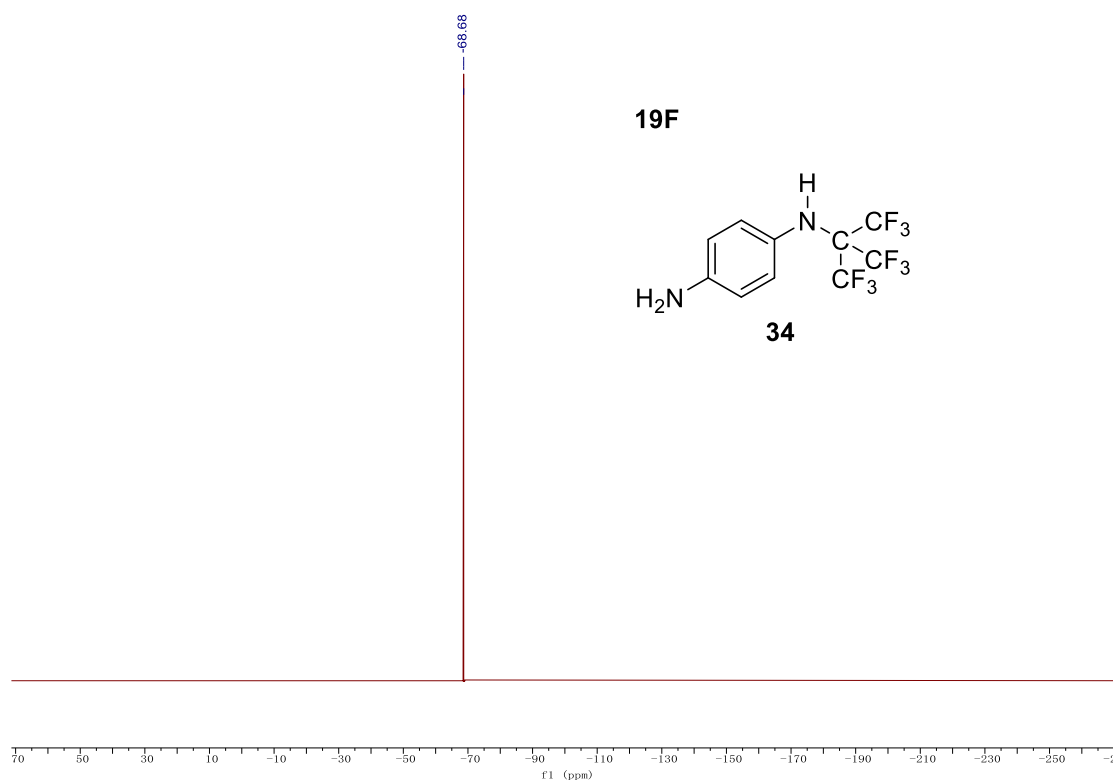

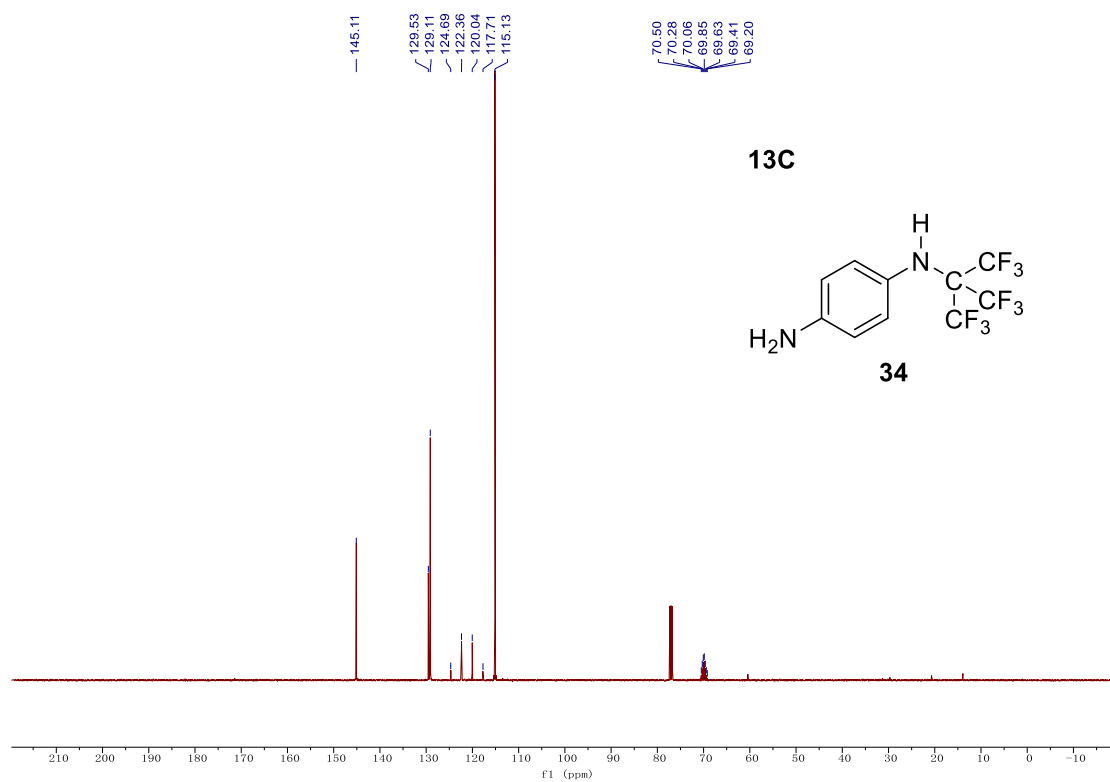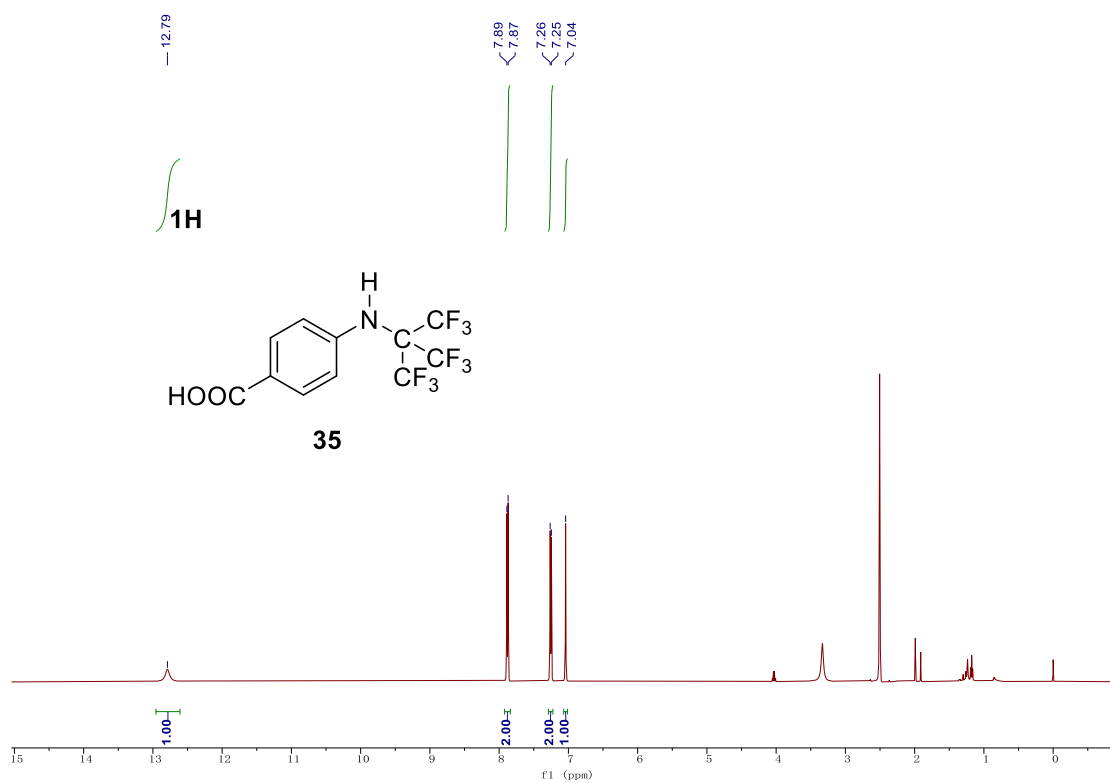

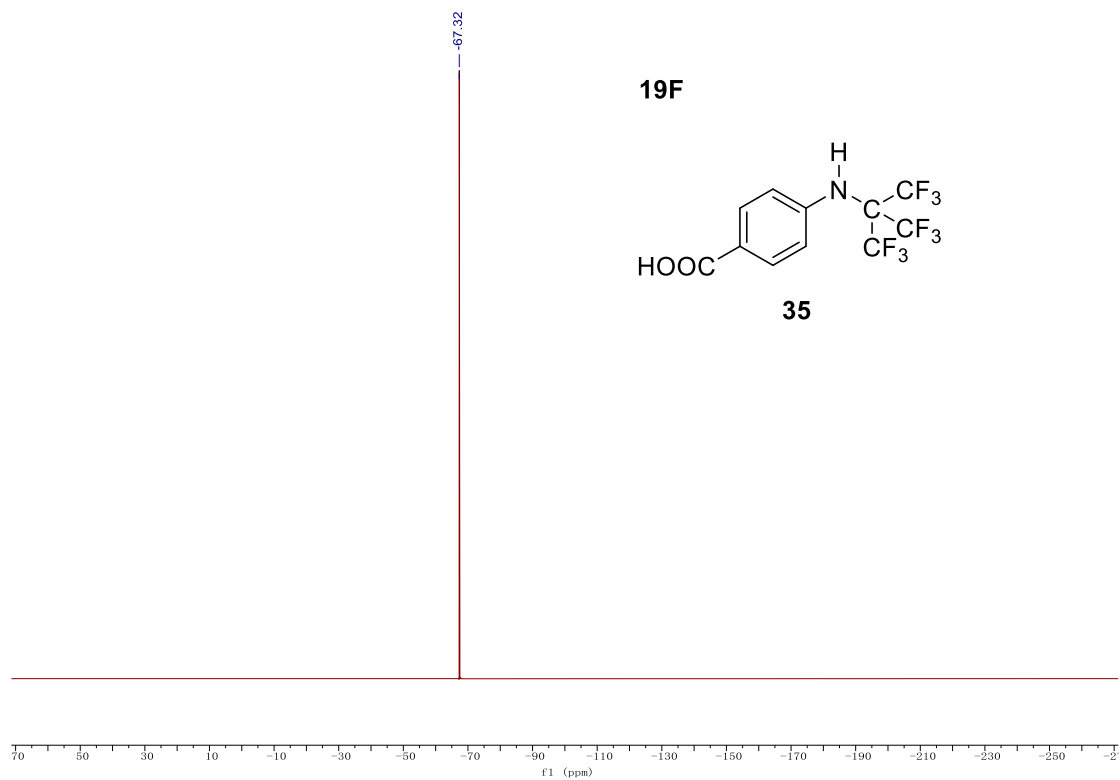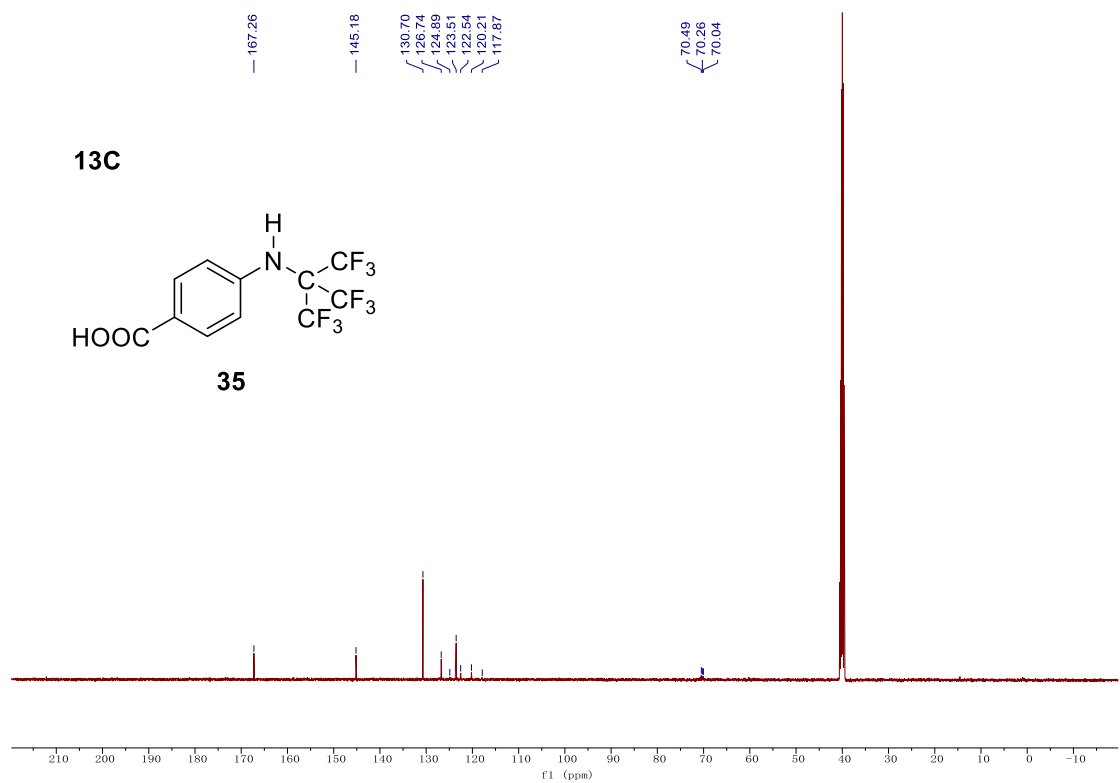



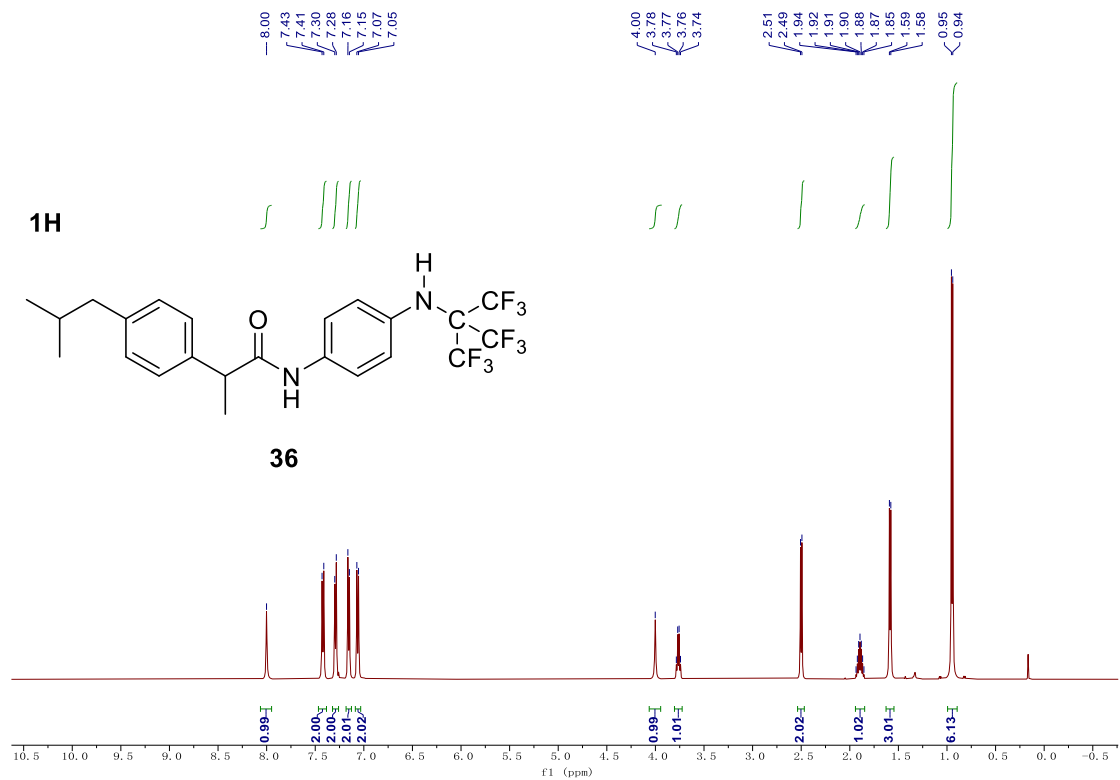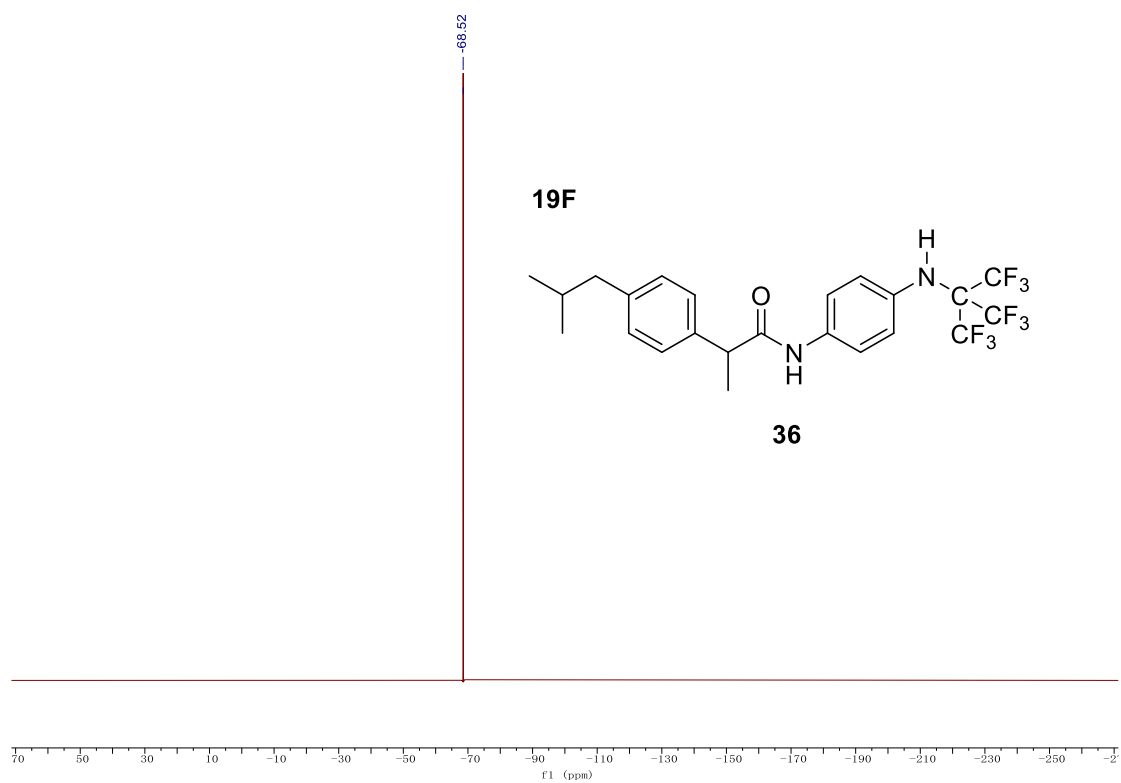

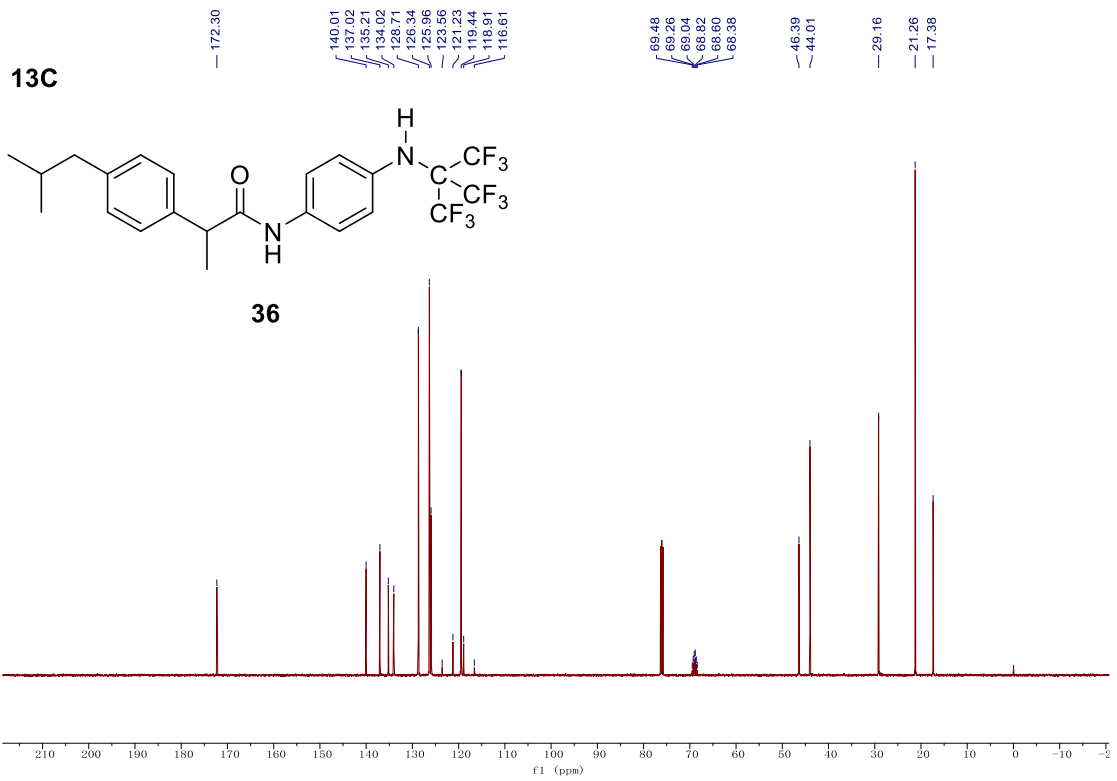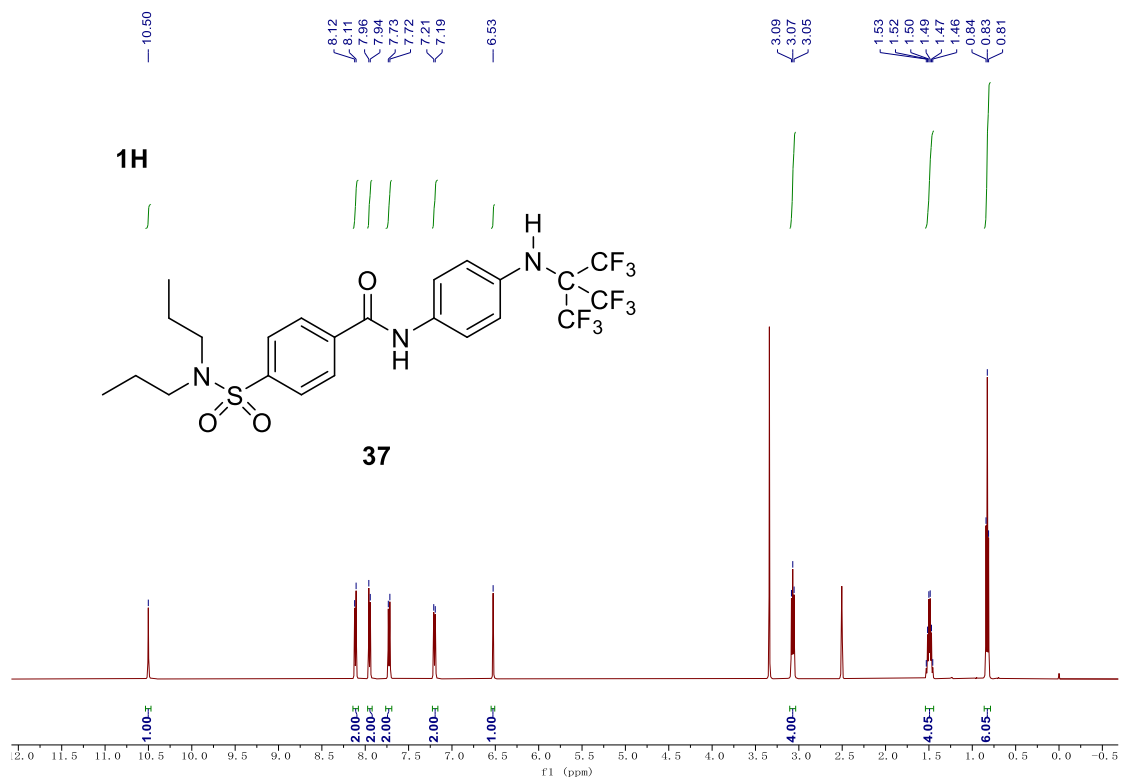

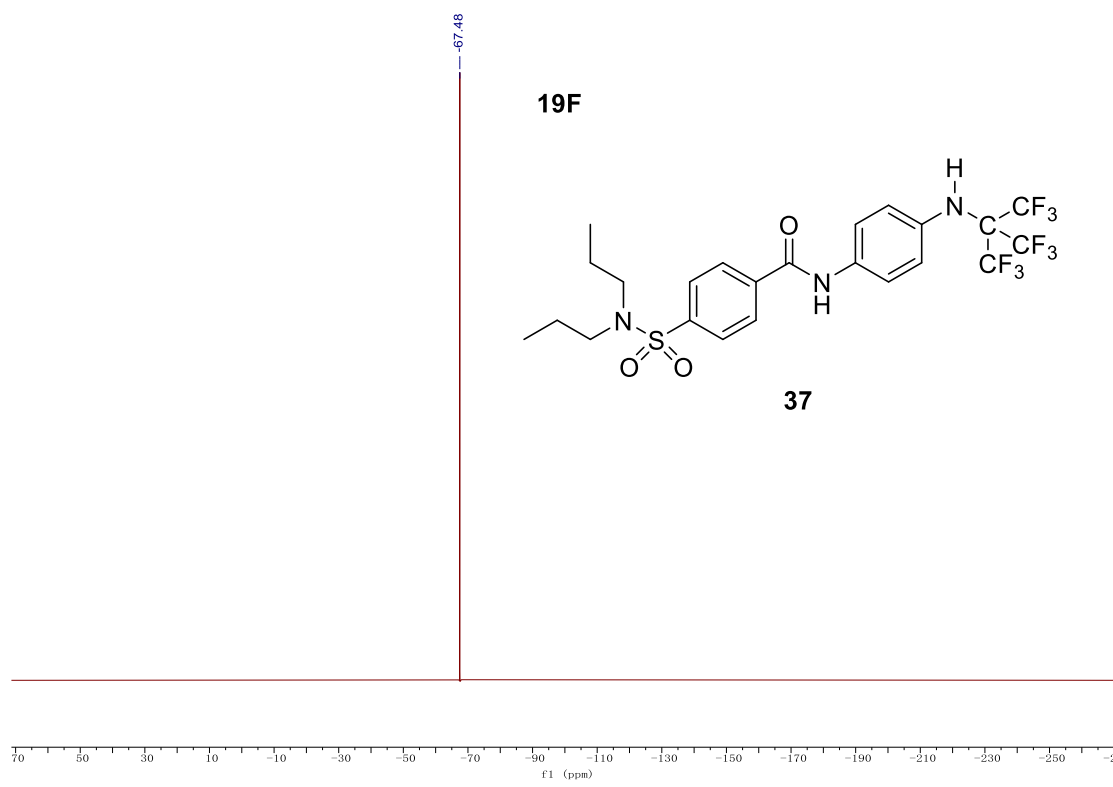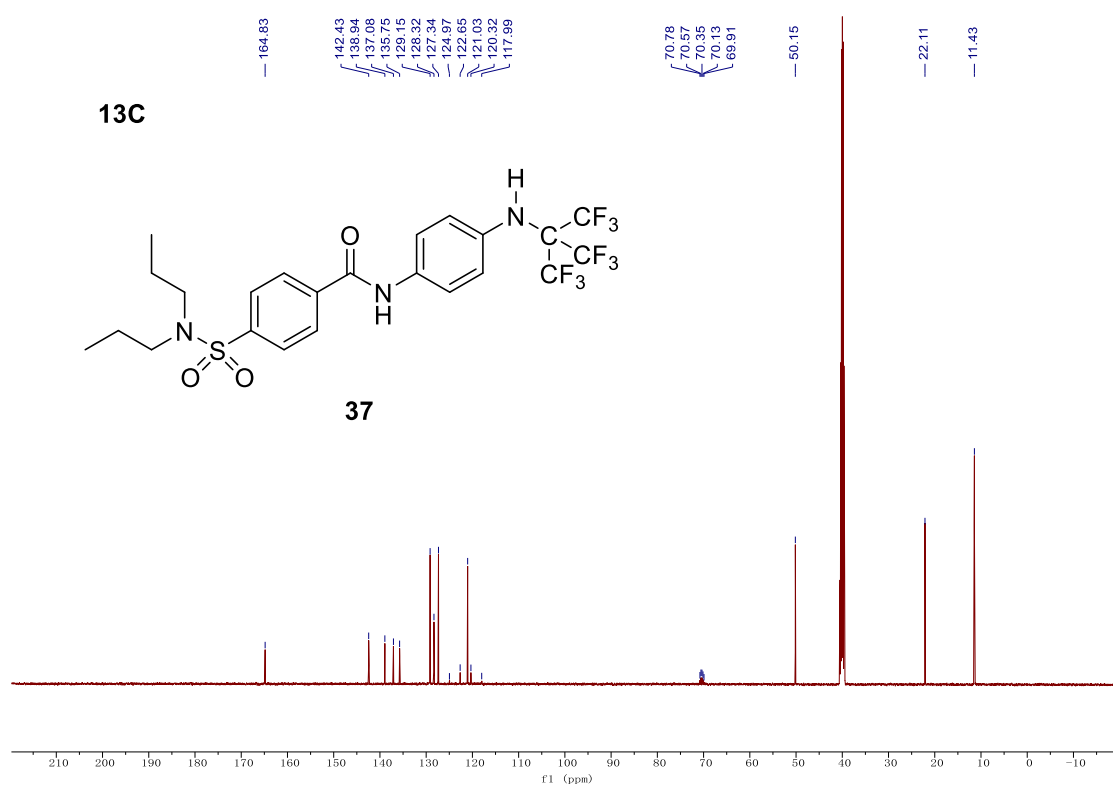

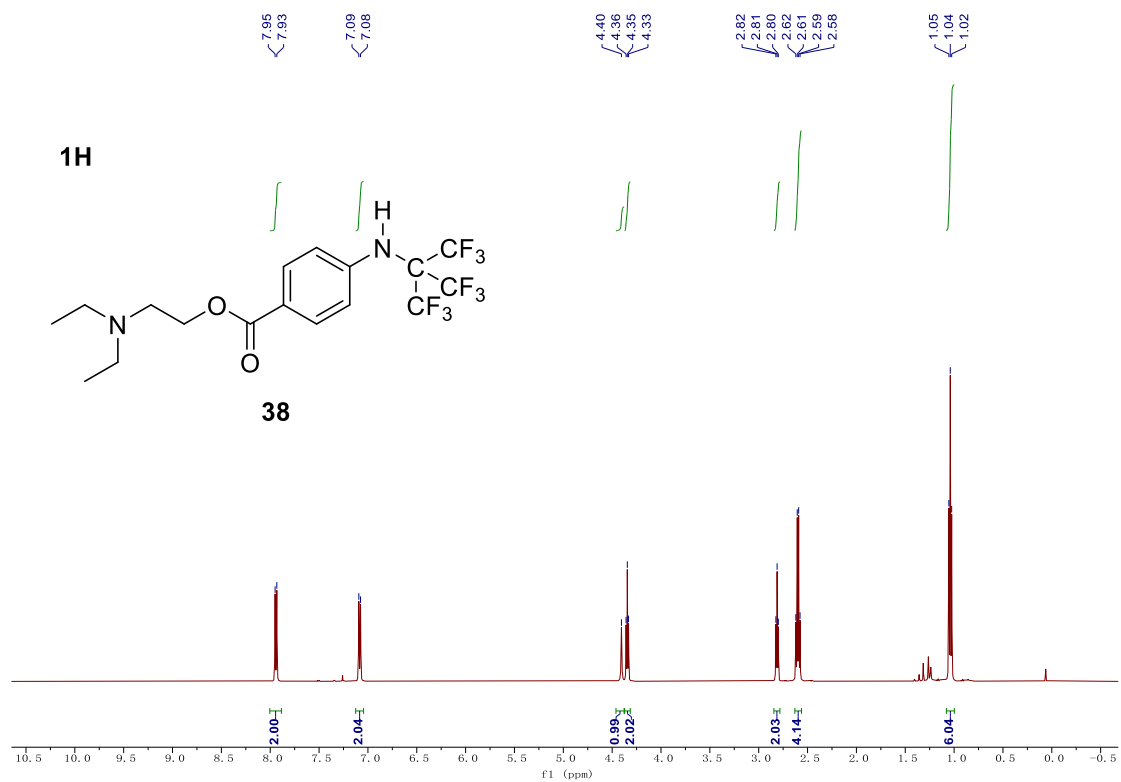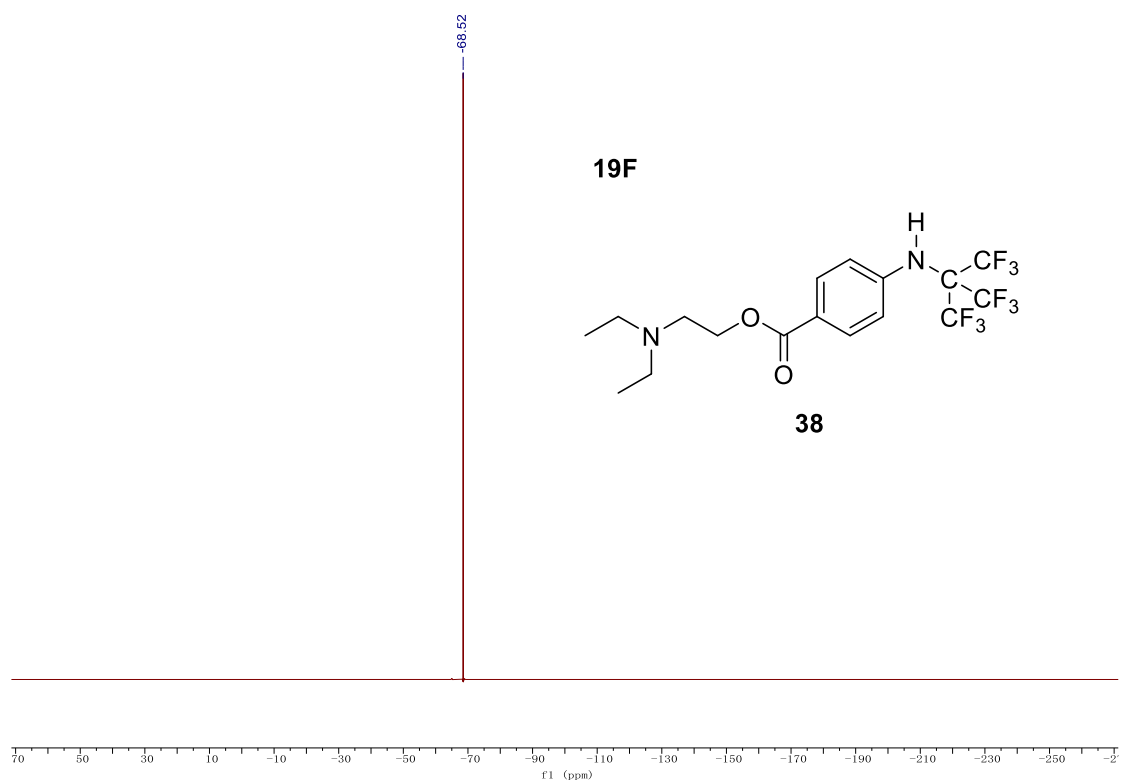

13C

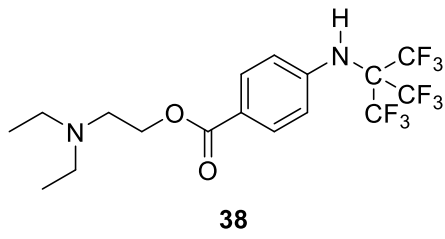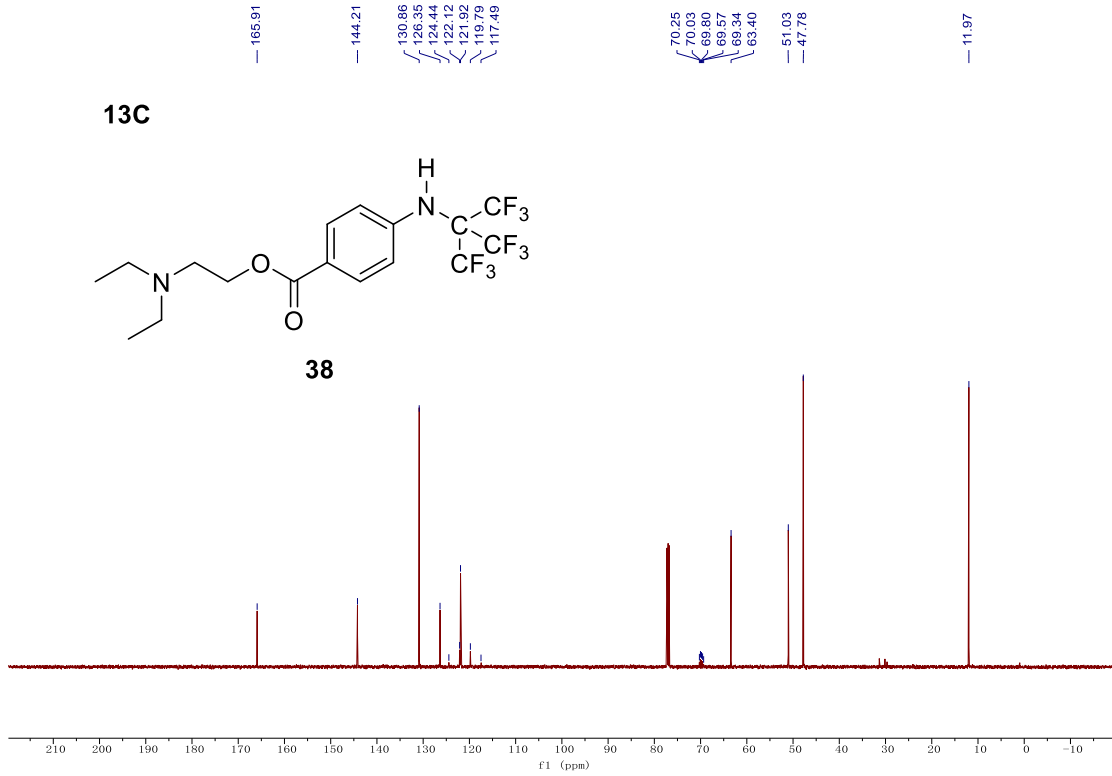

<sup>1</sup>H

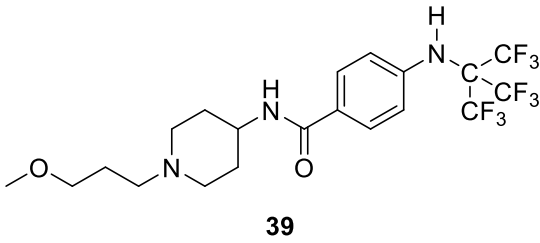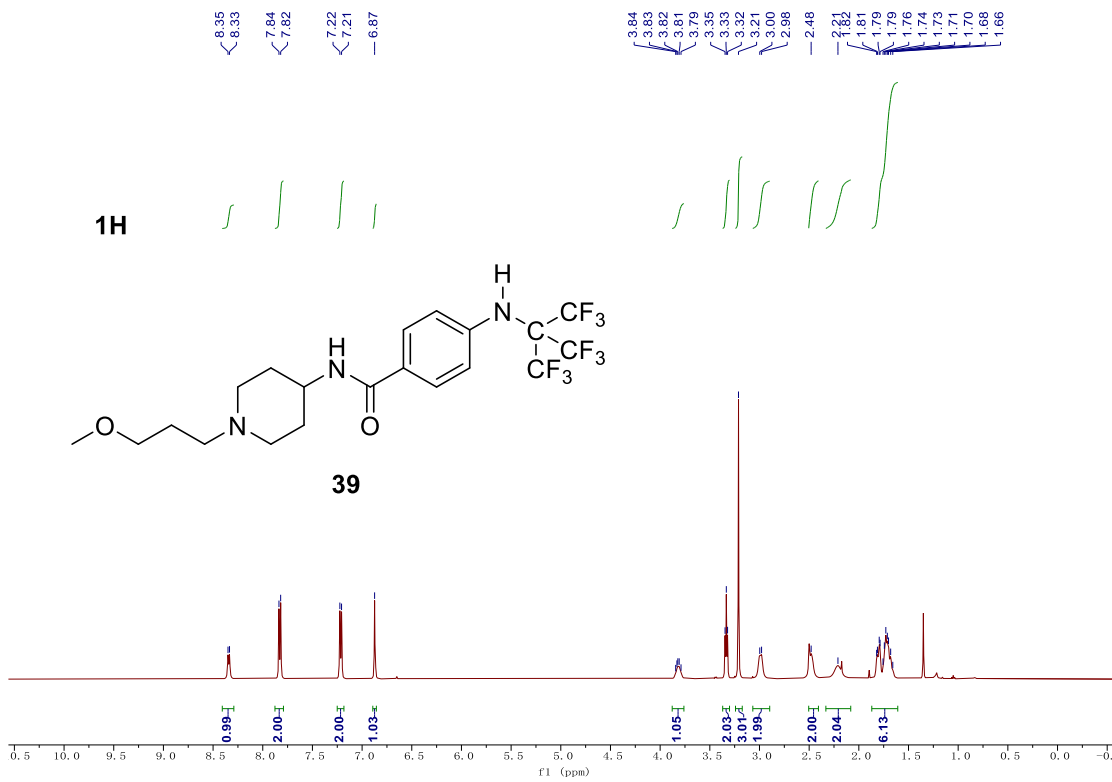

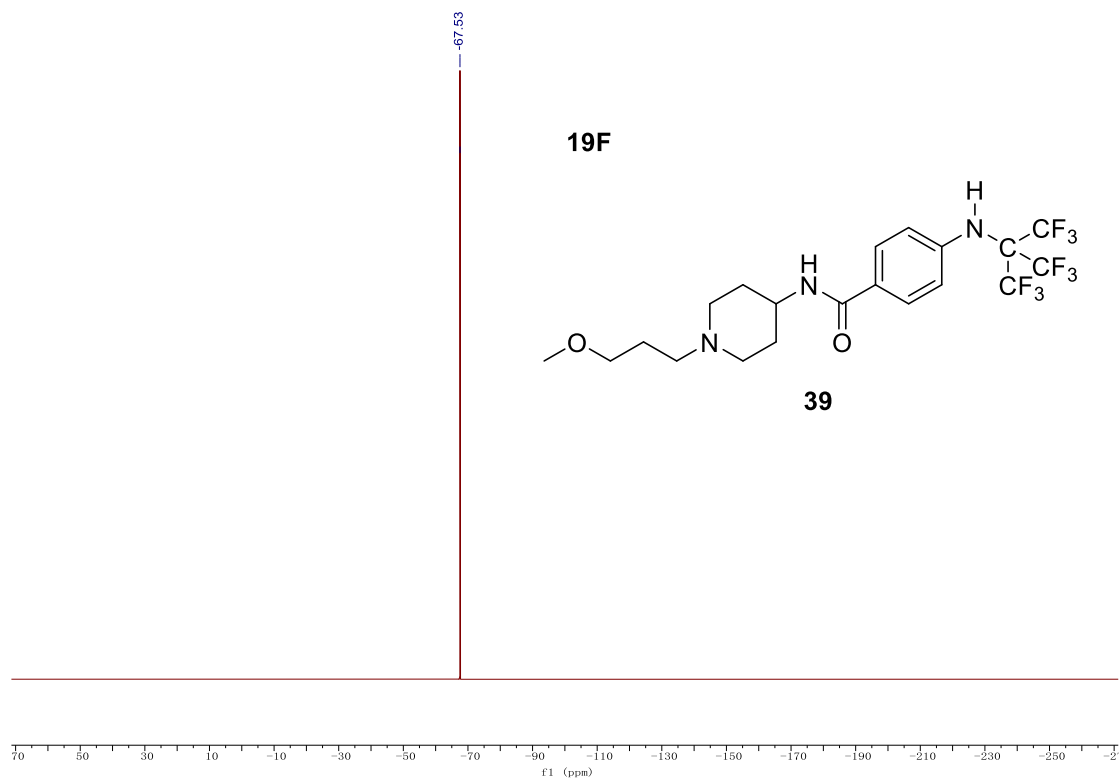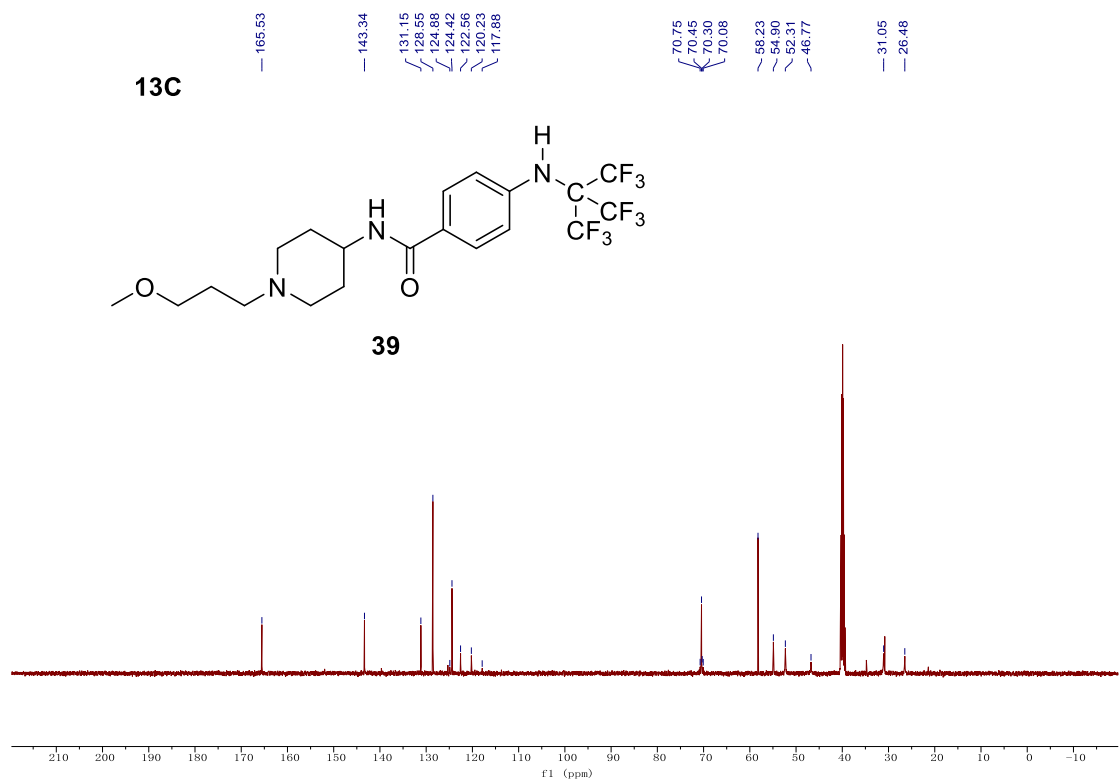

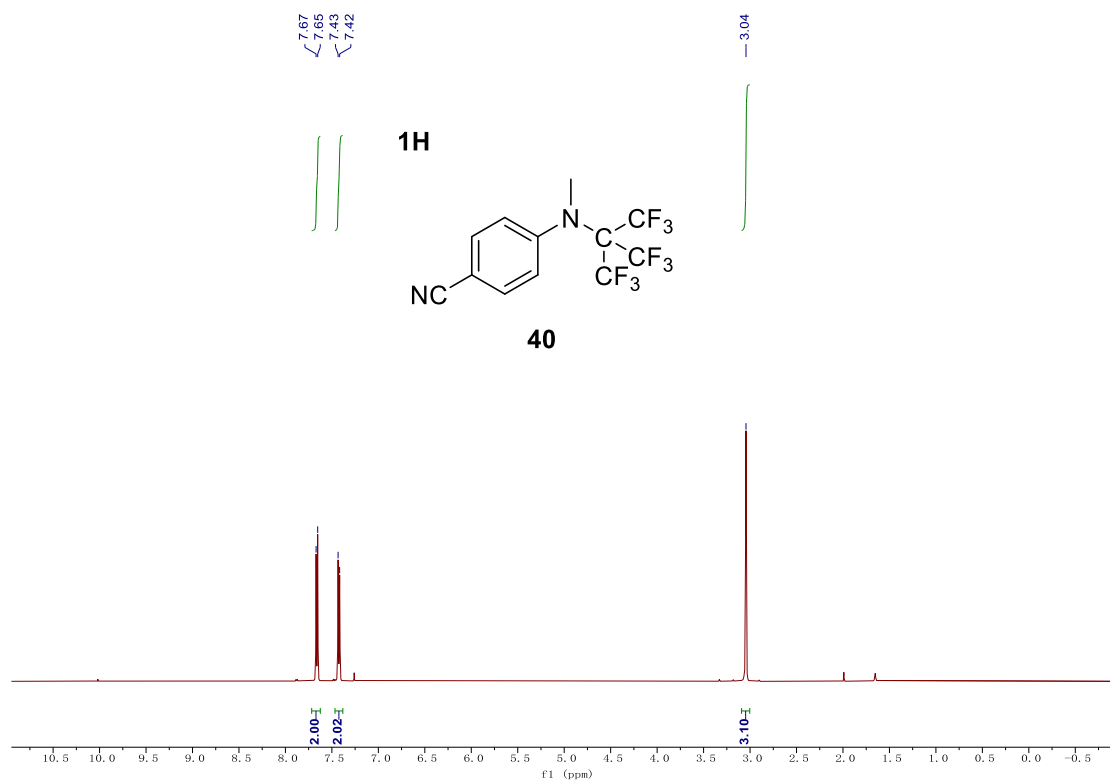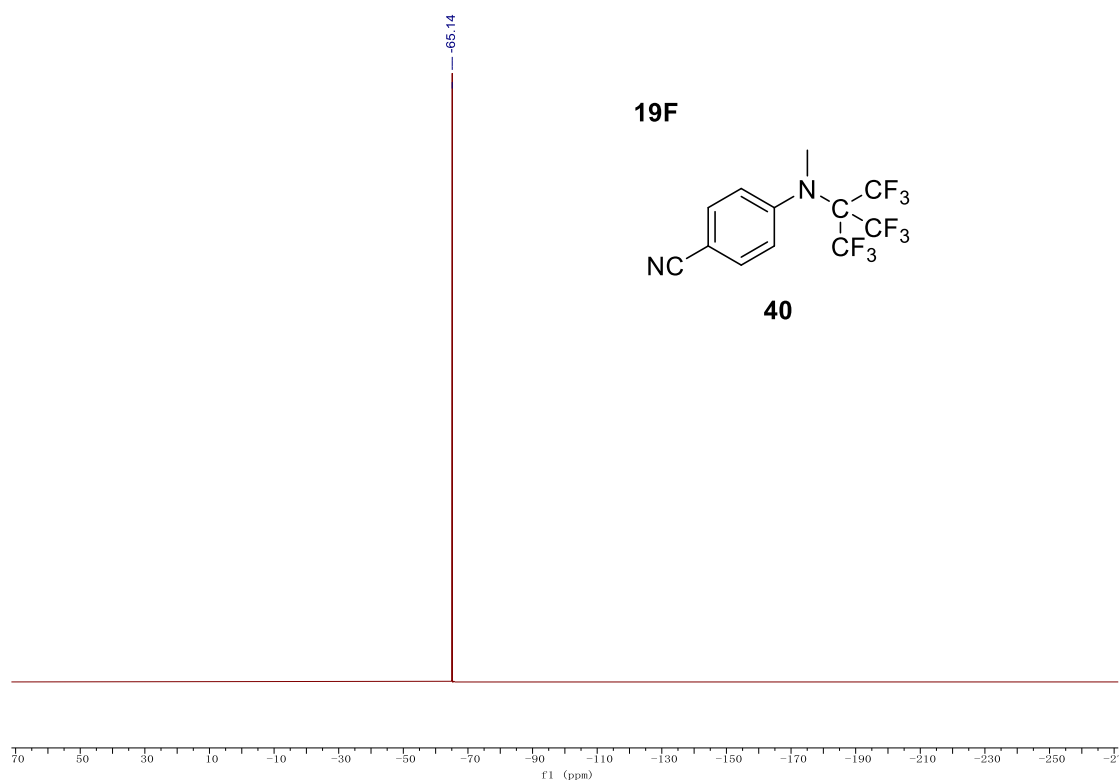

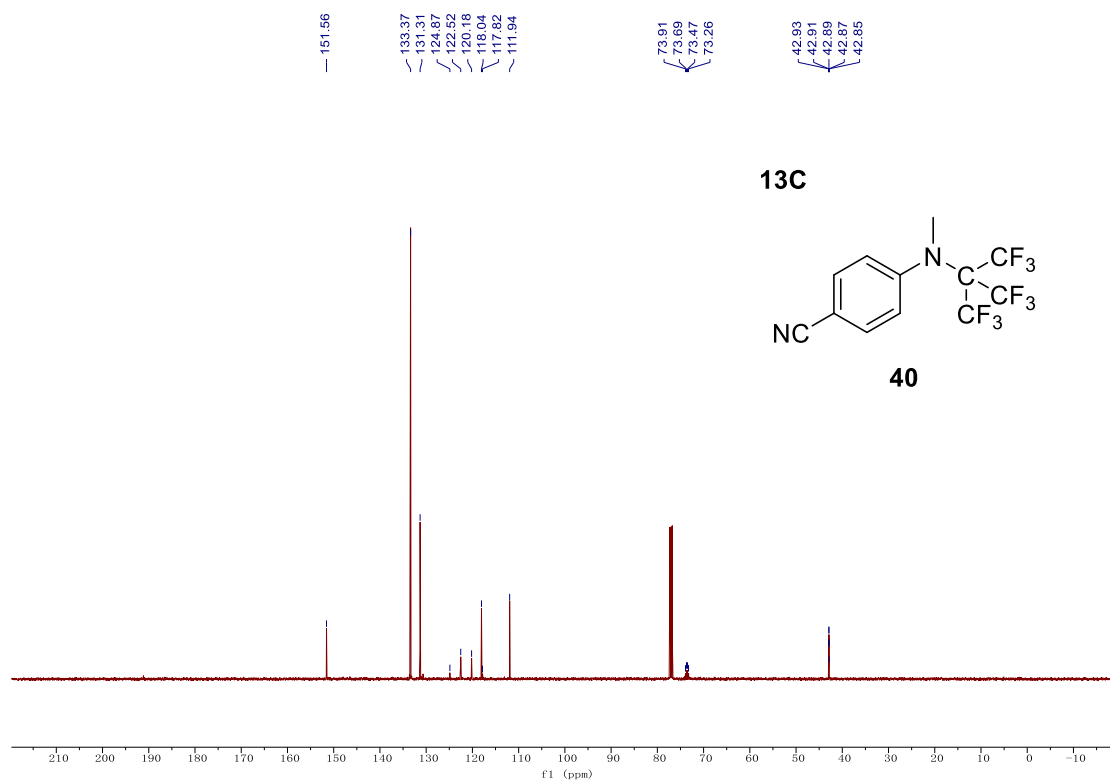

**13C**

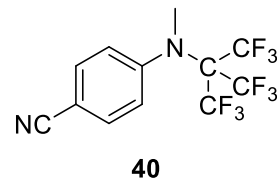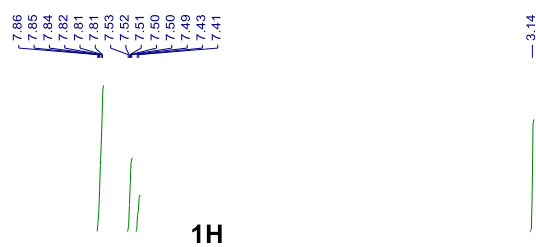

**1H**

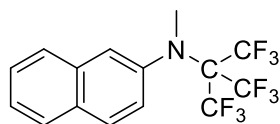

**41**

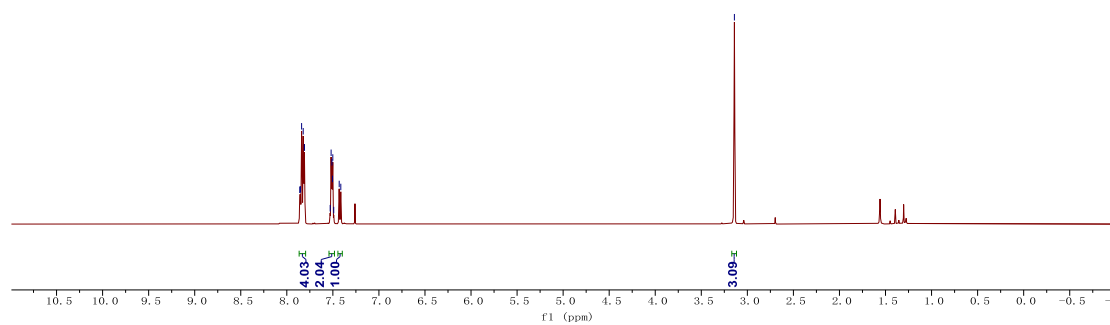



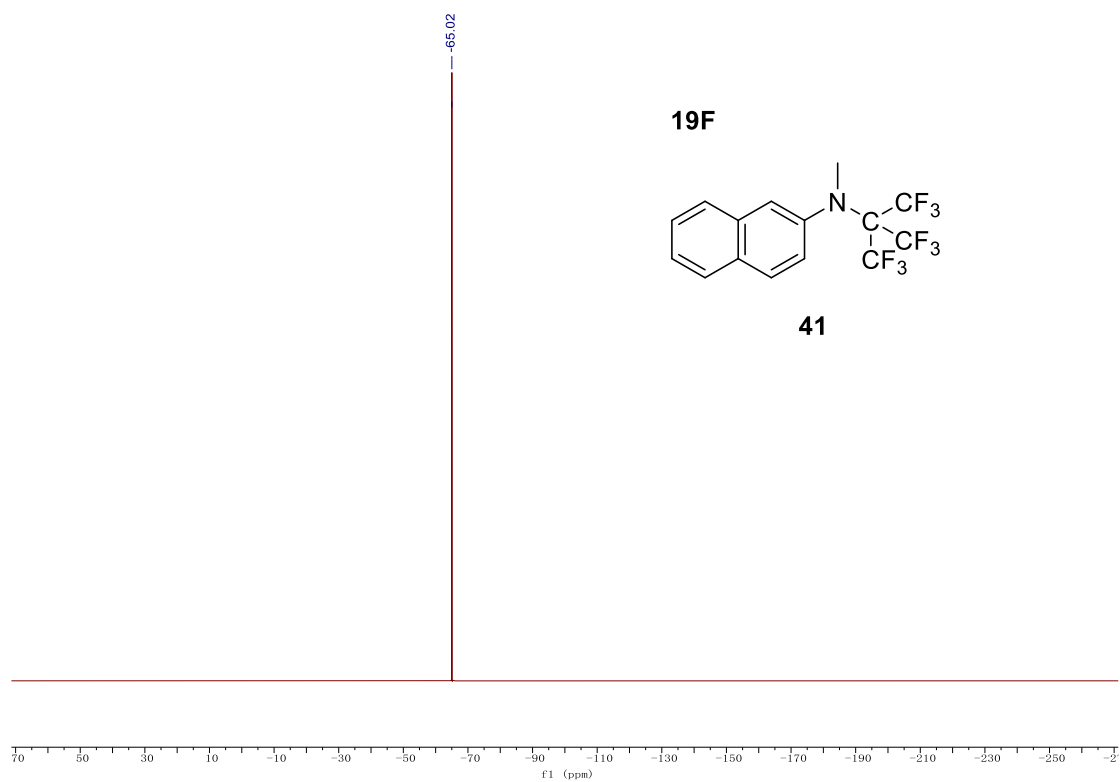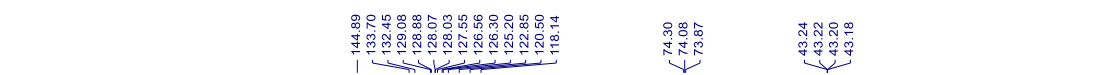

**13C**

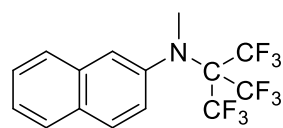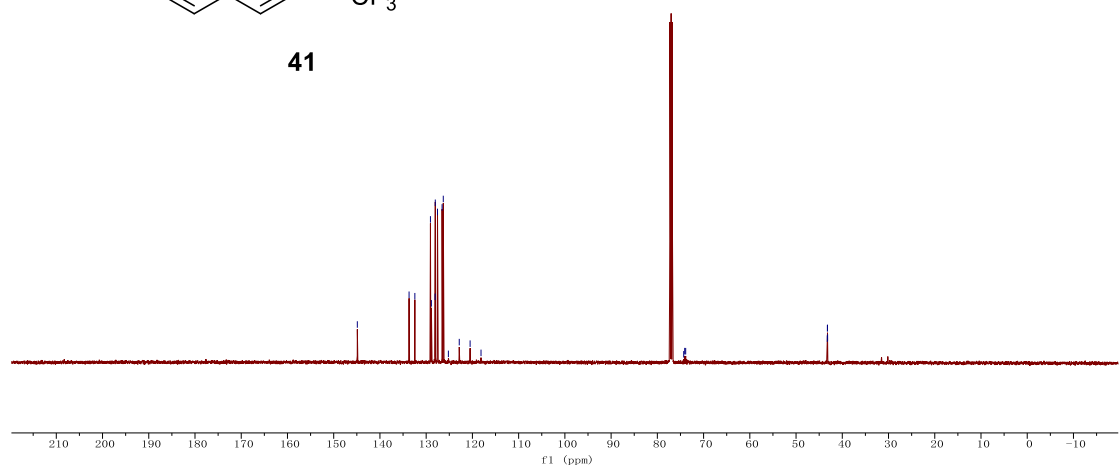

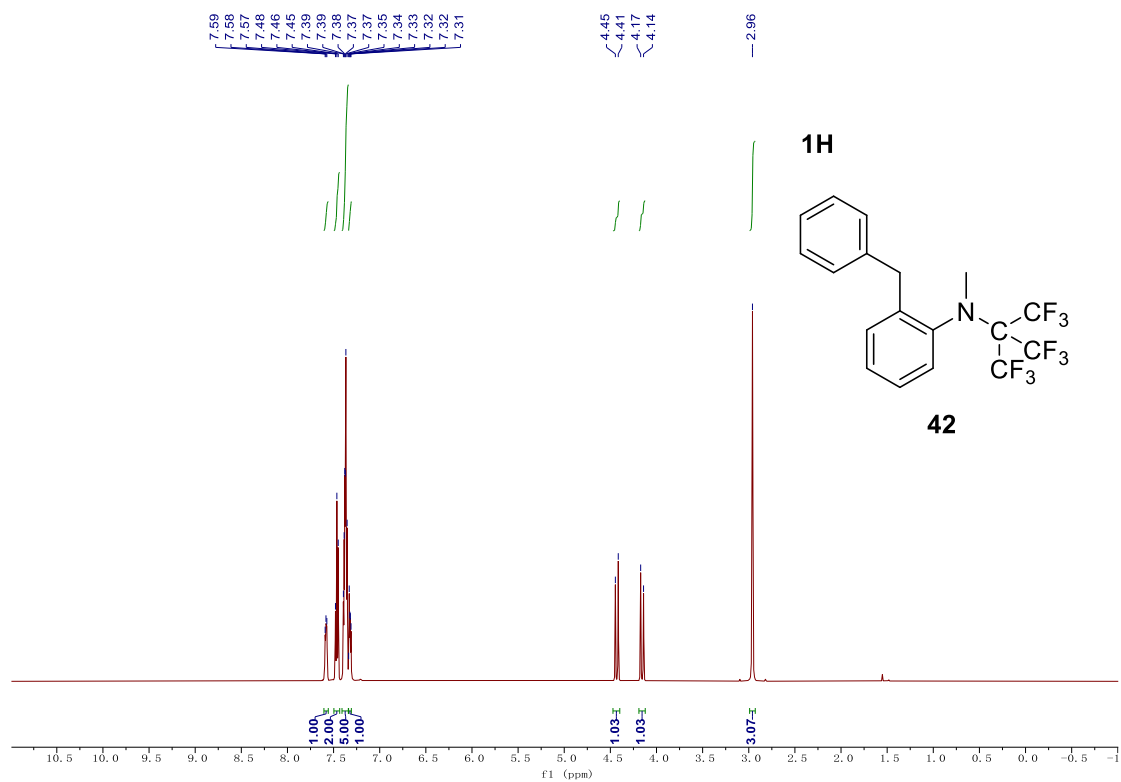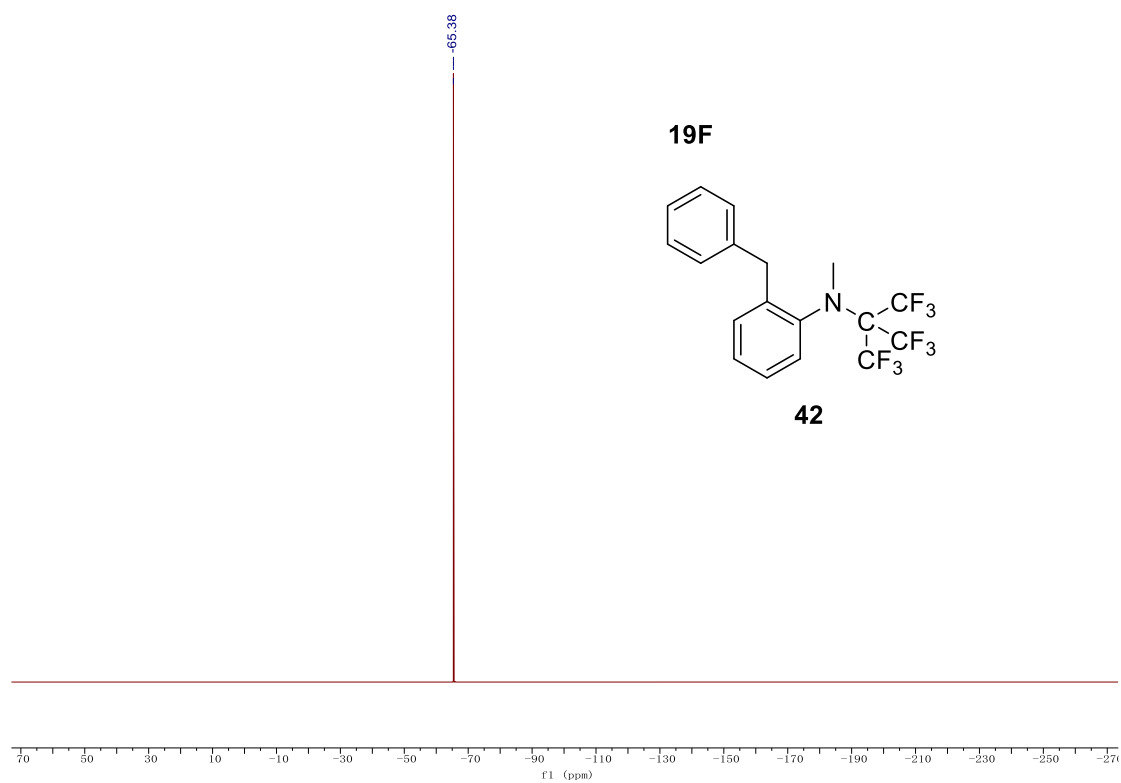

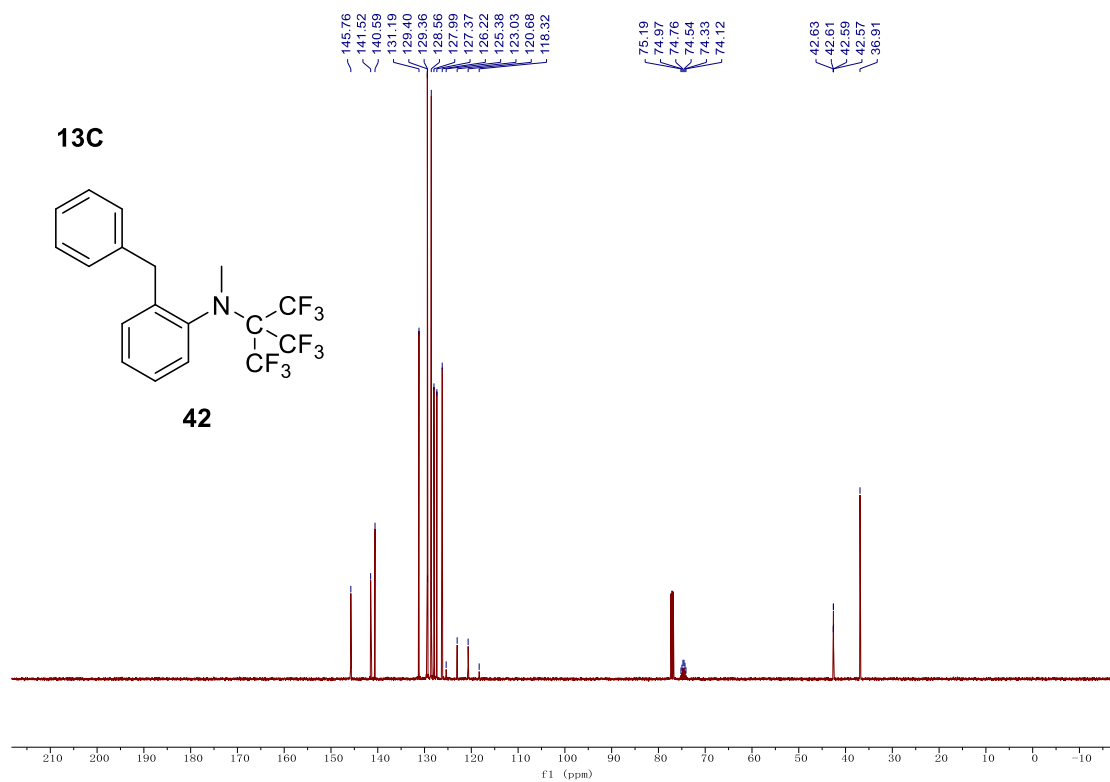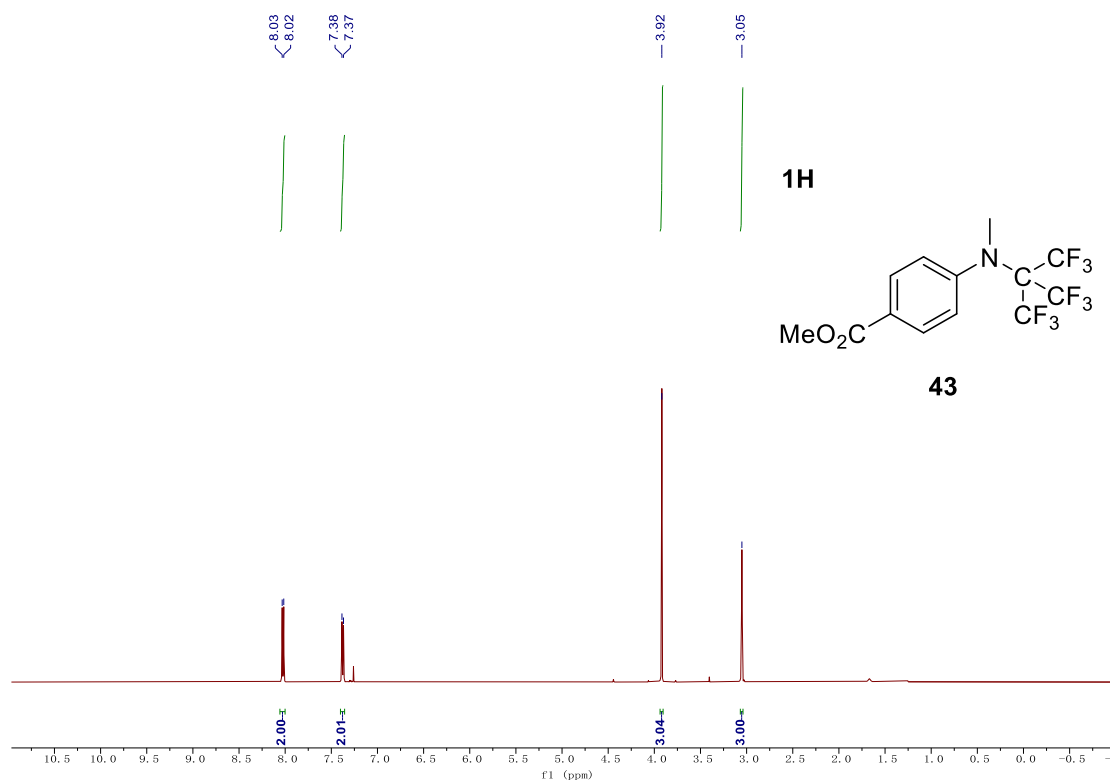

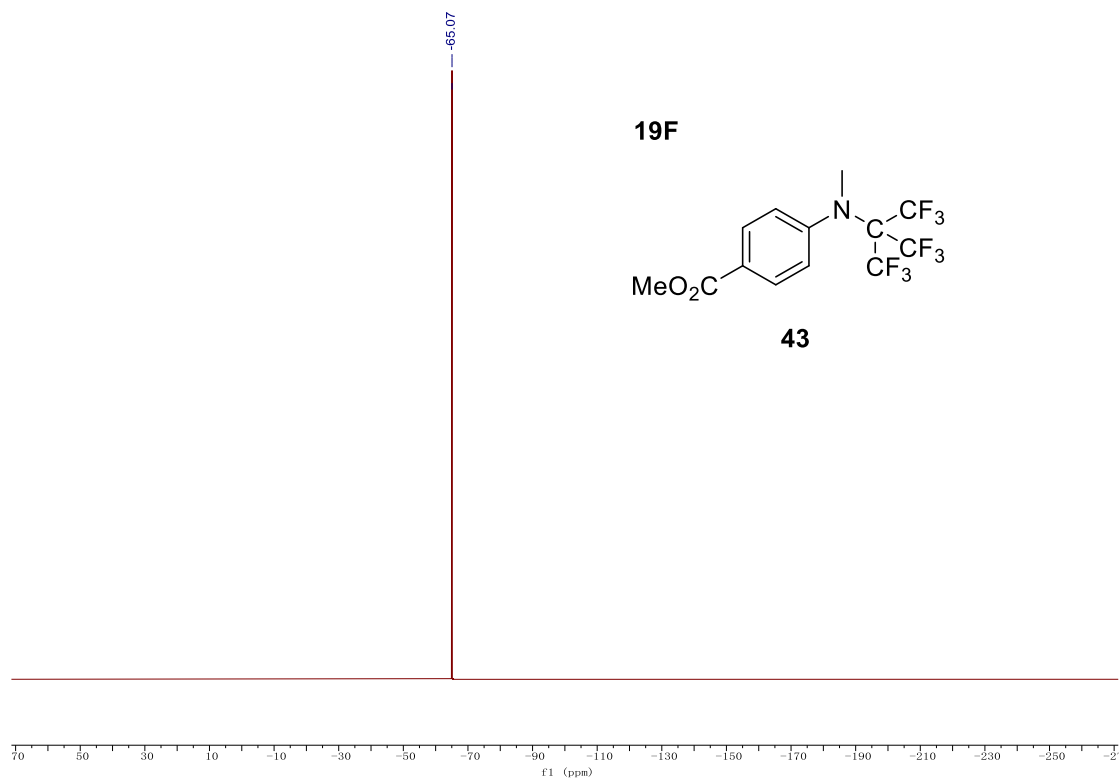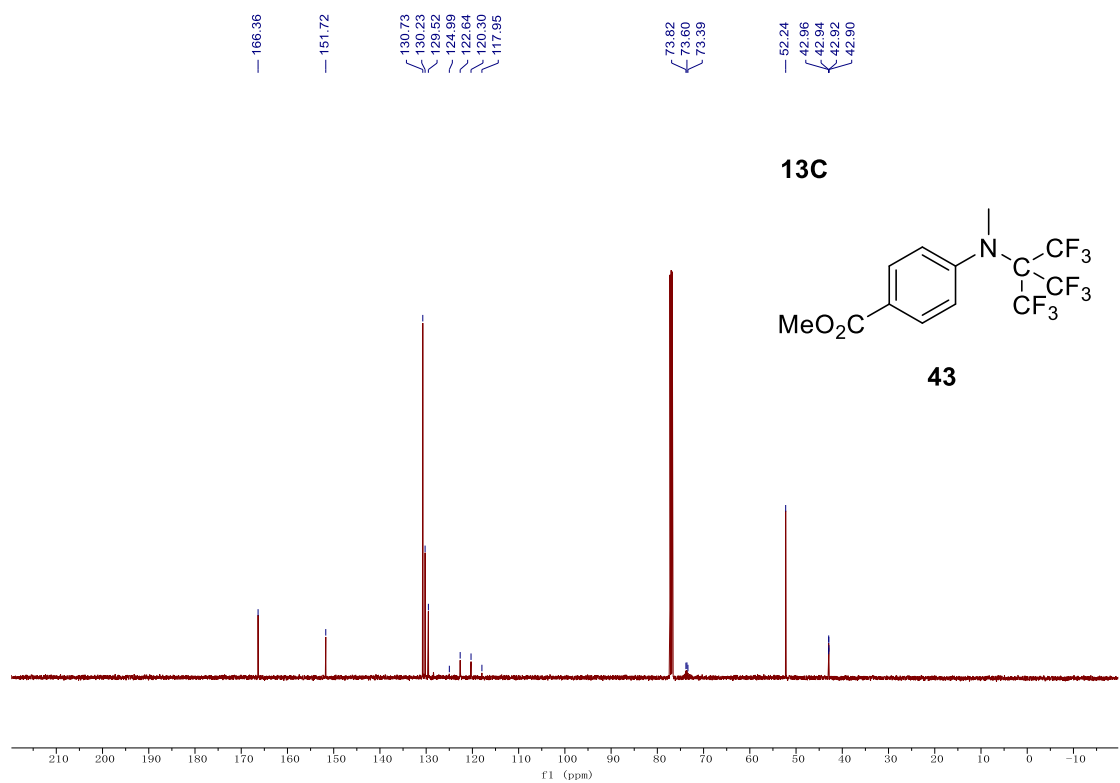

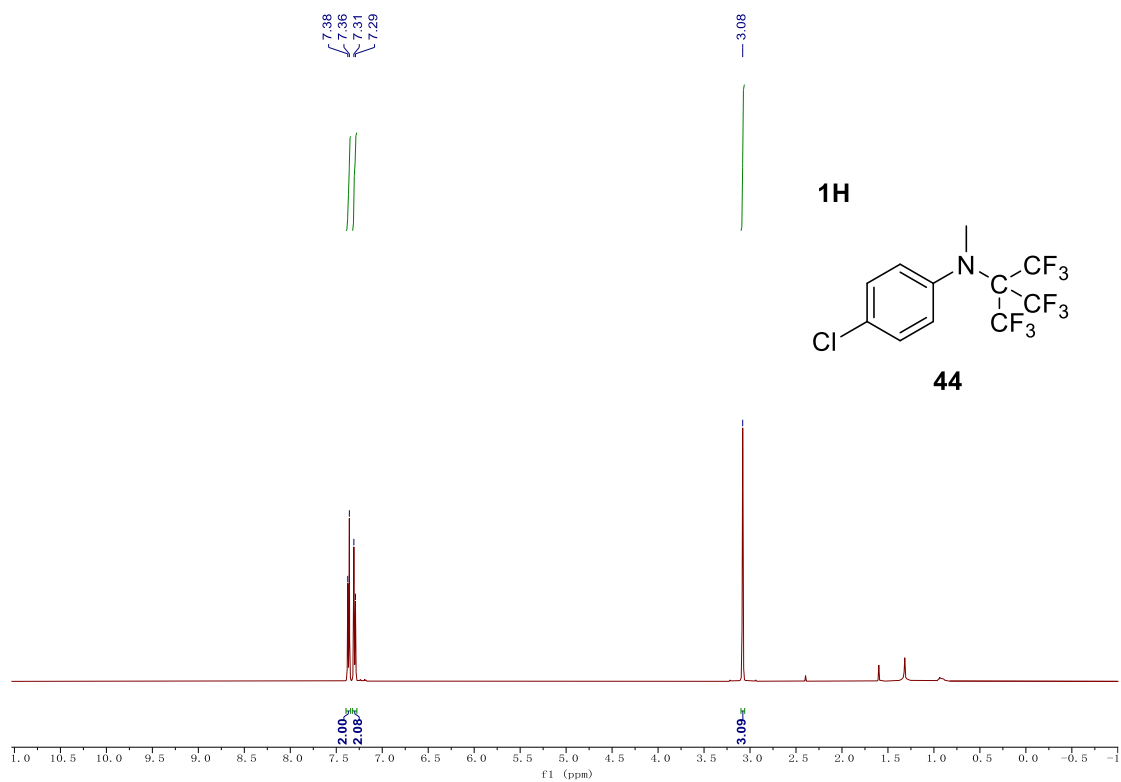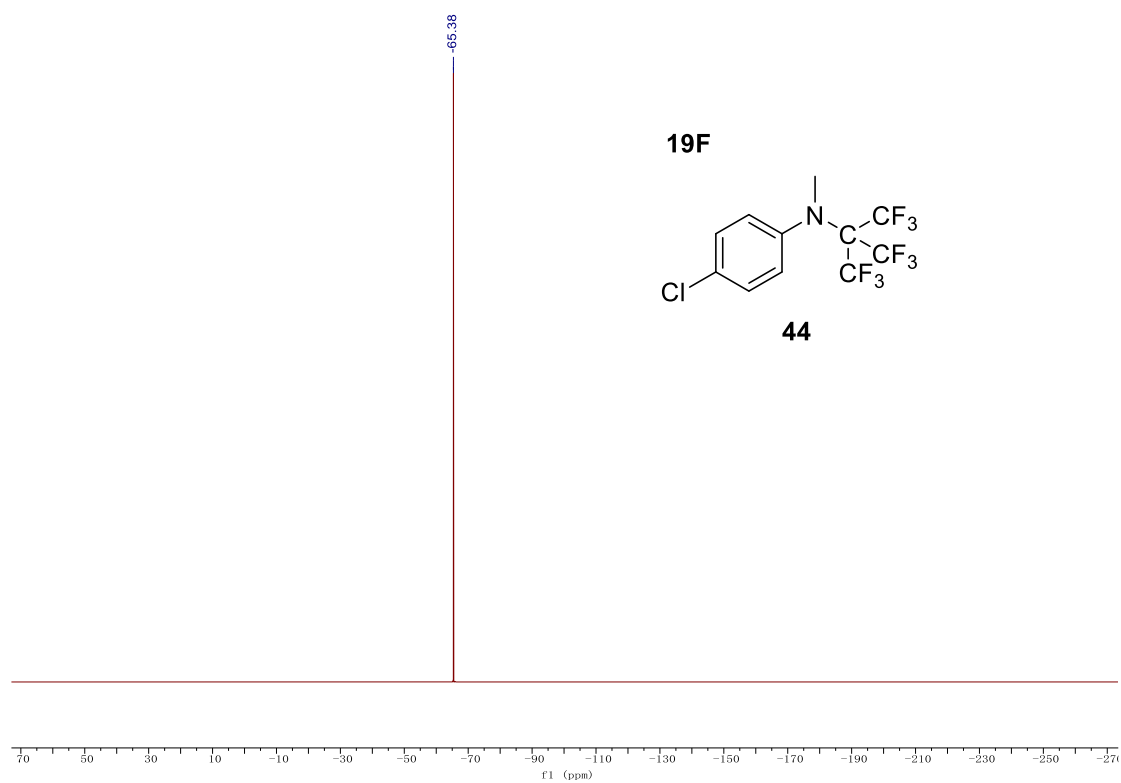

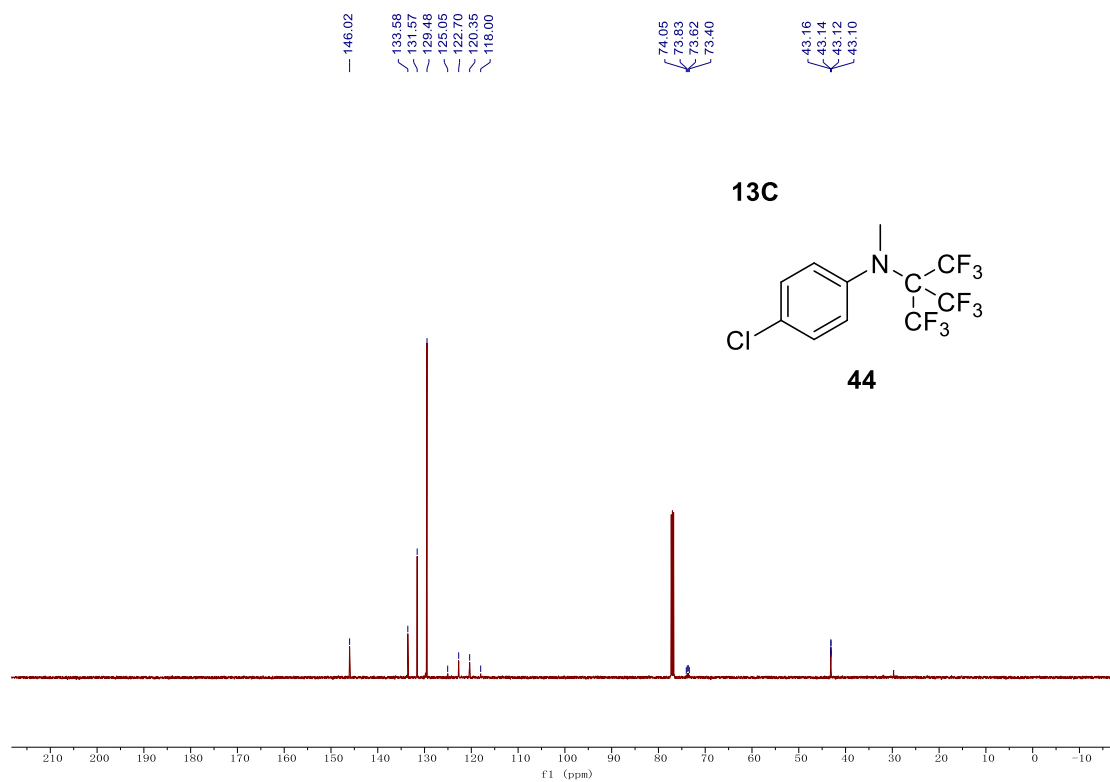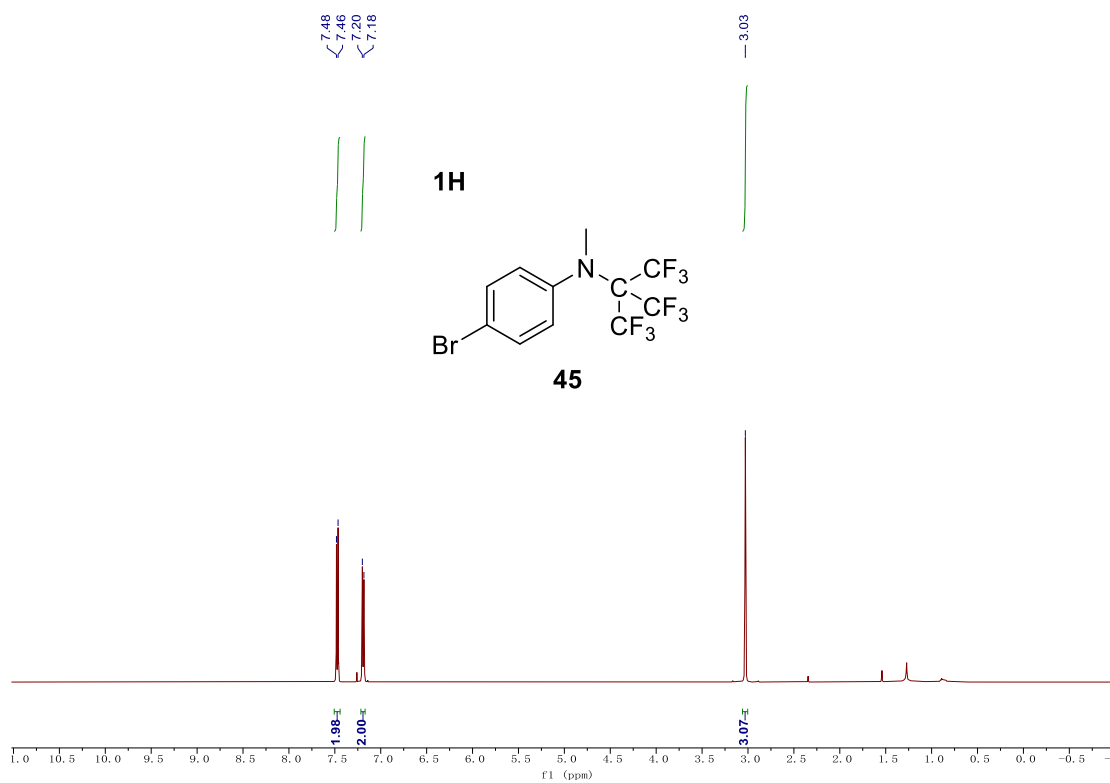

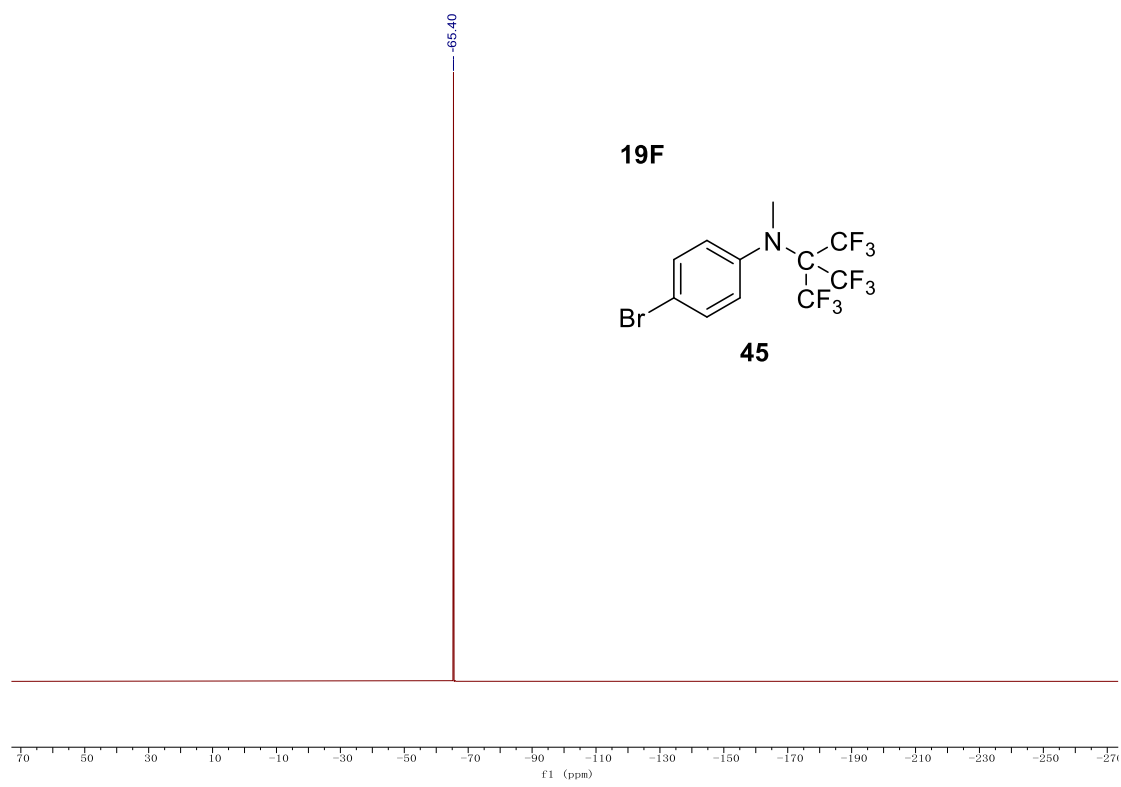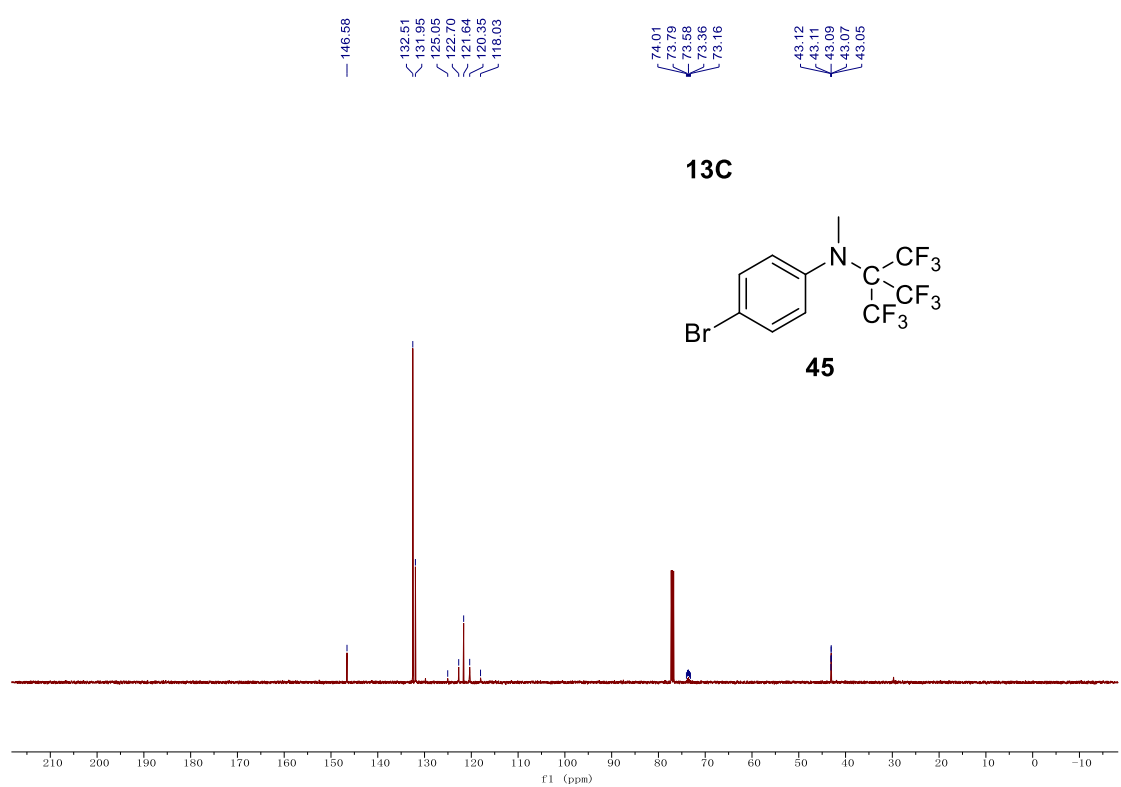

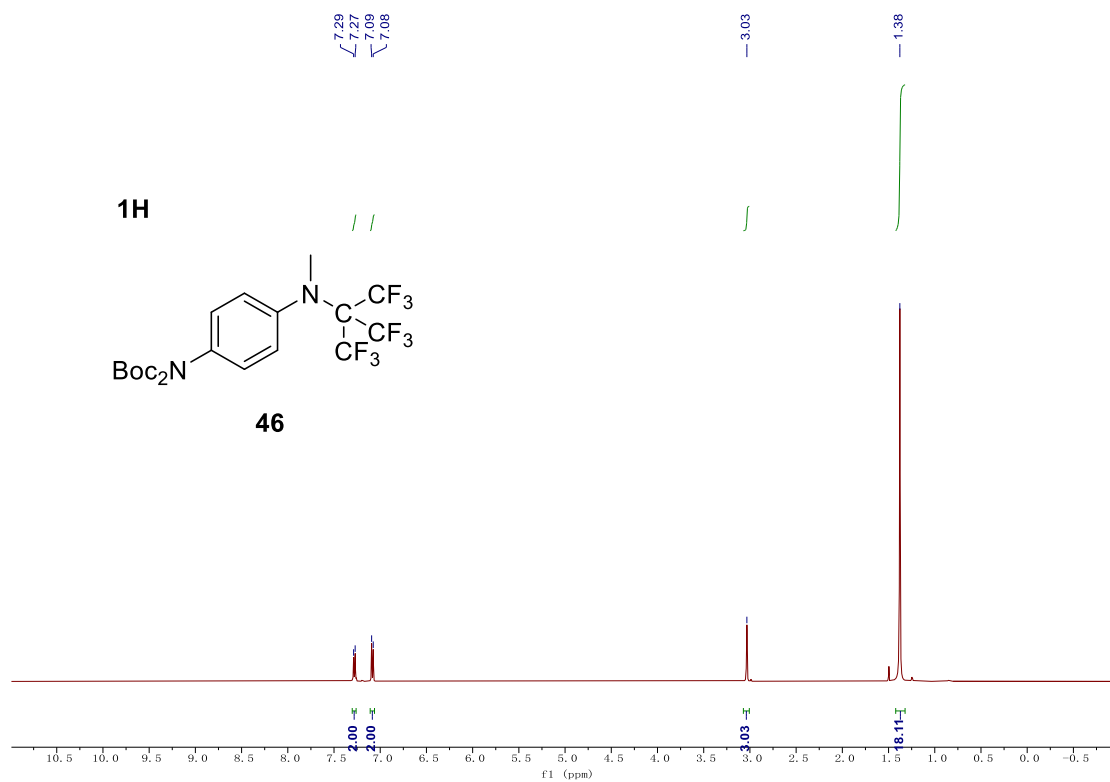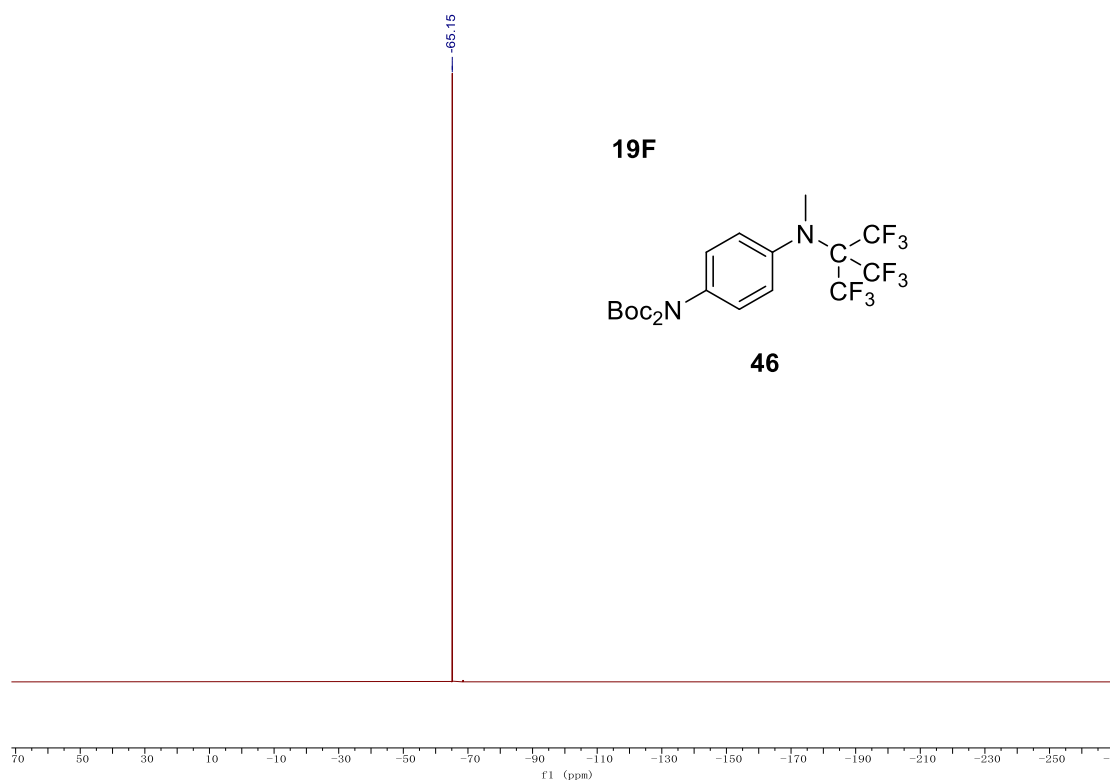



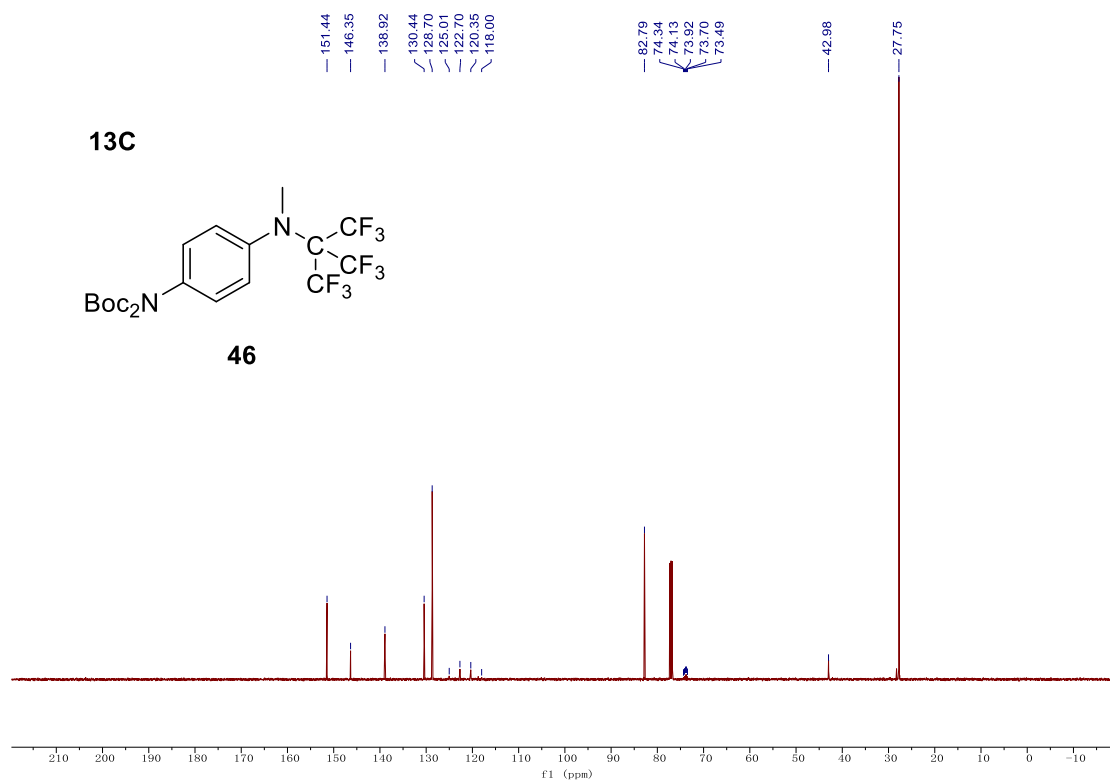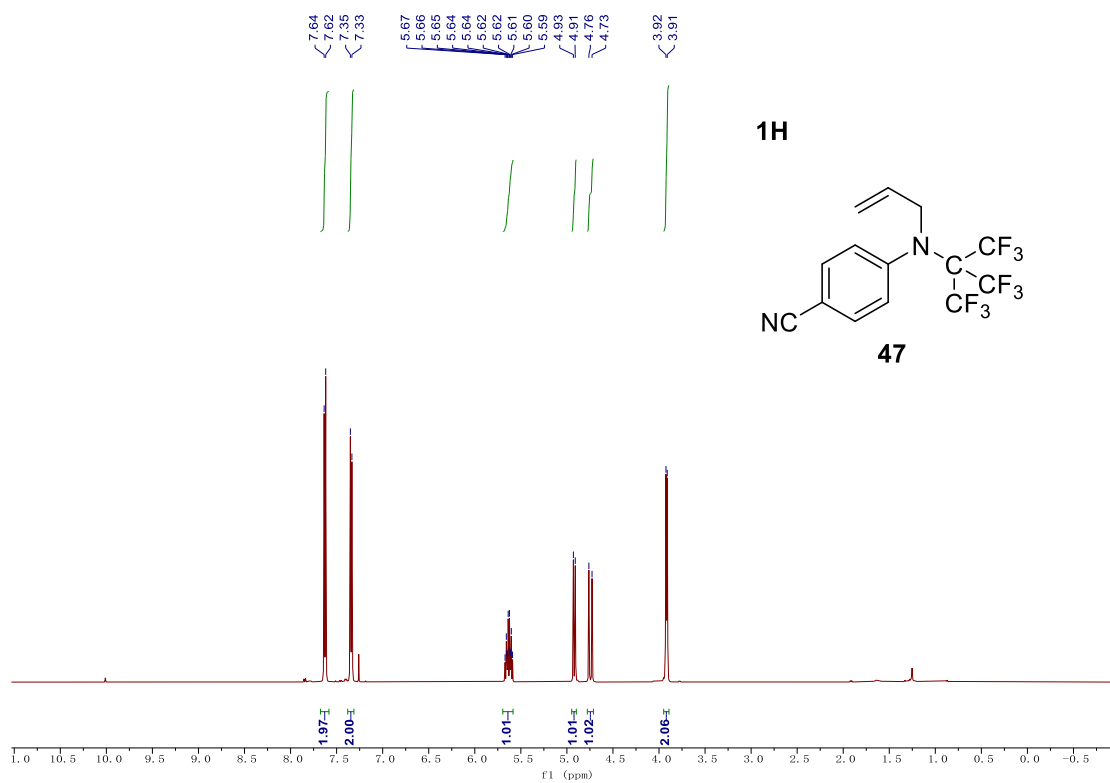

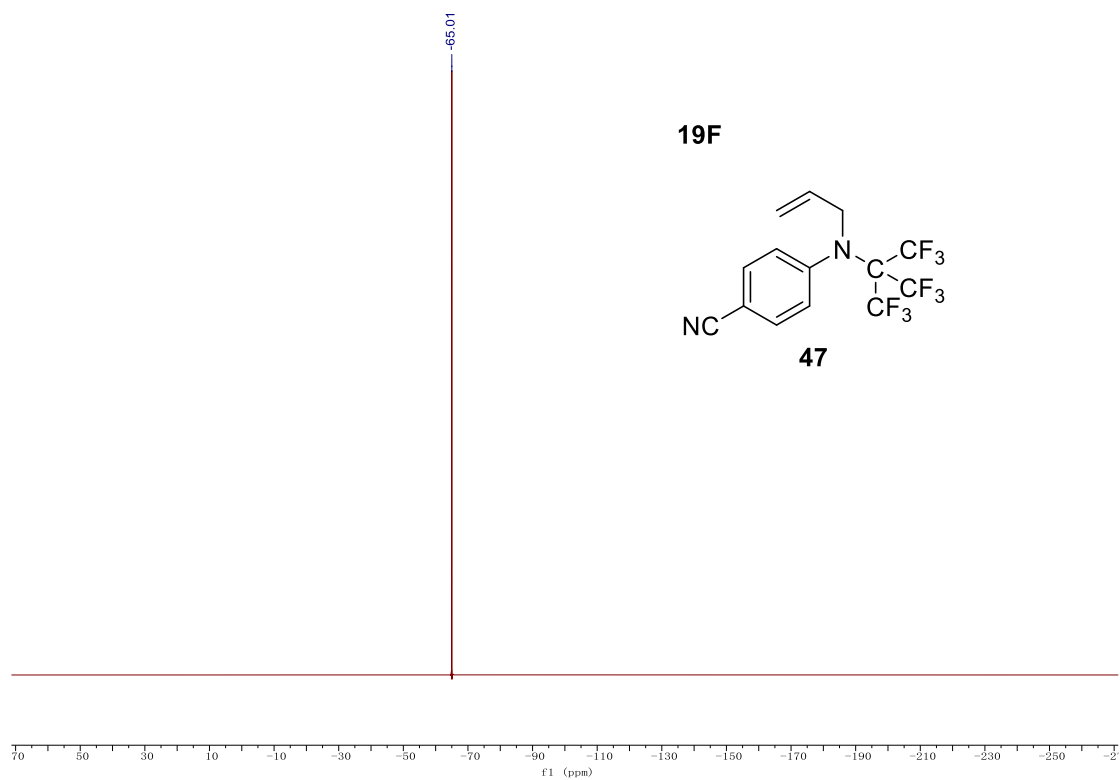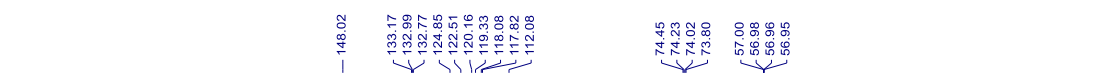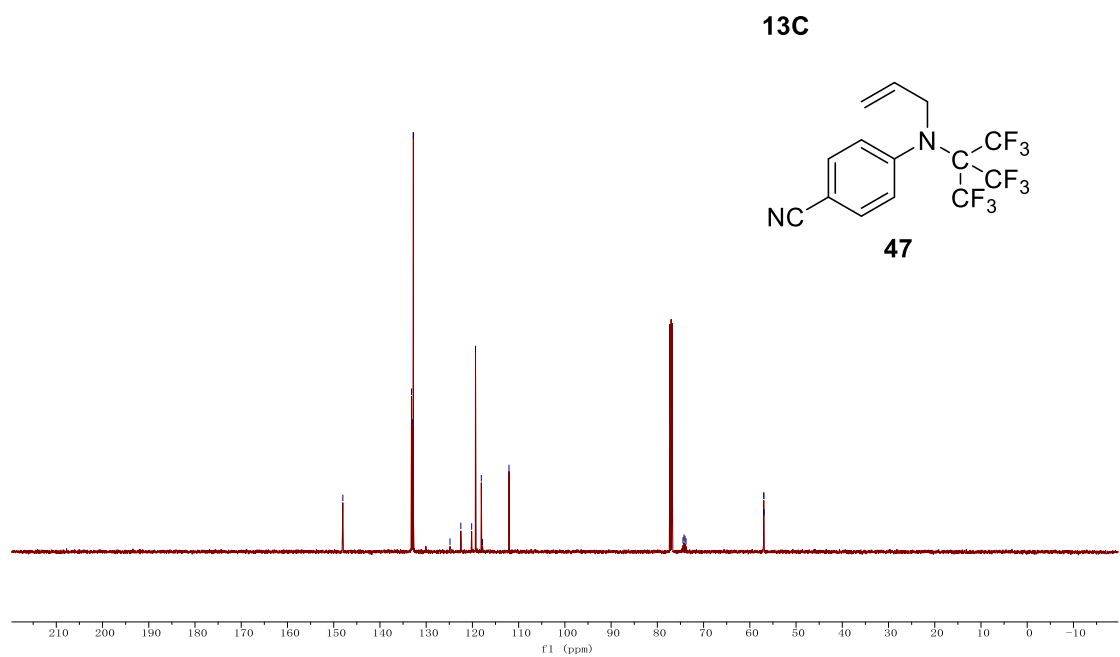

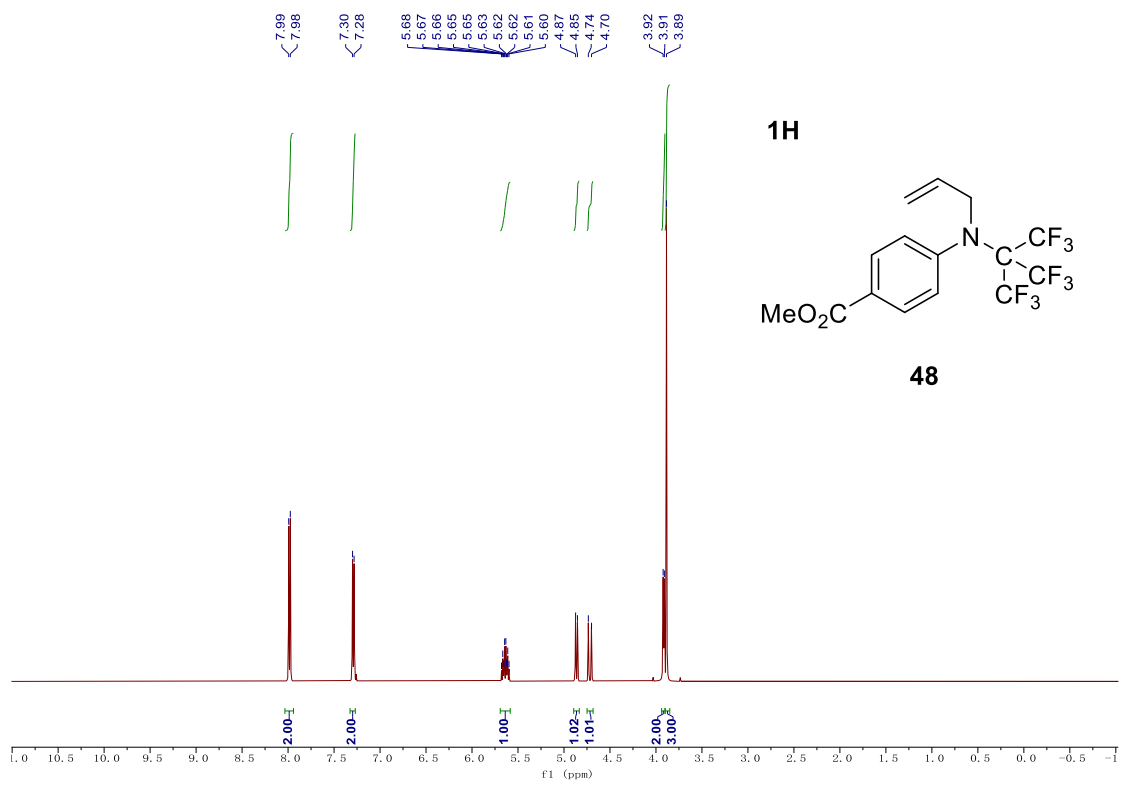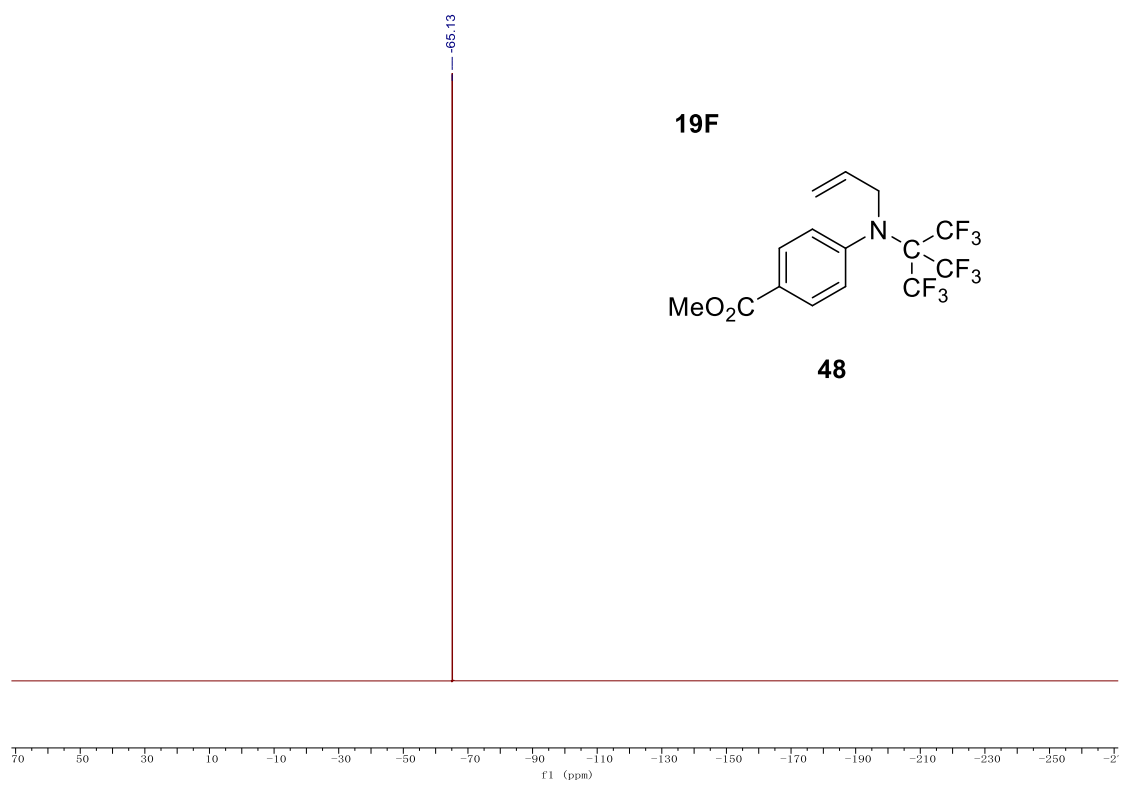

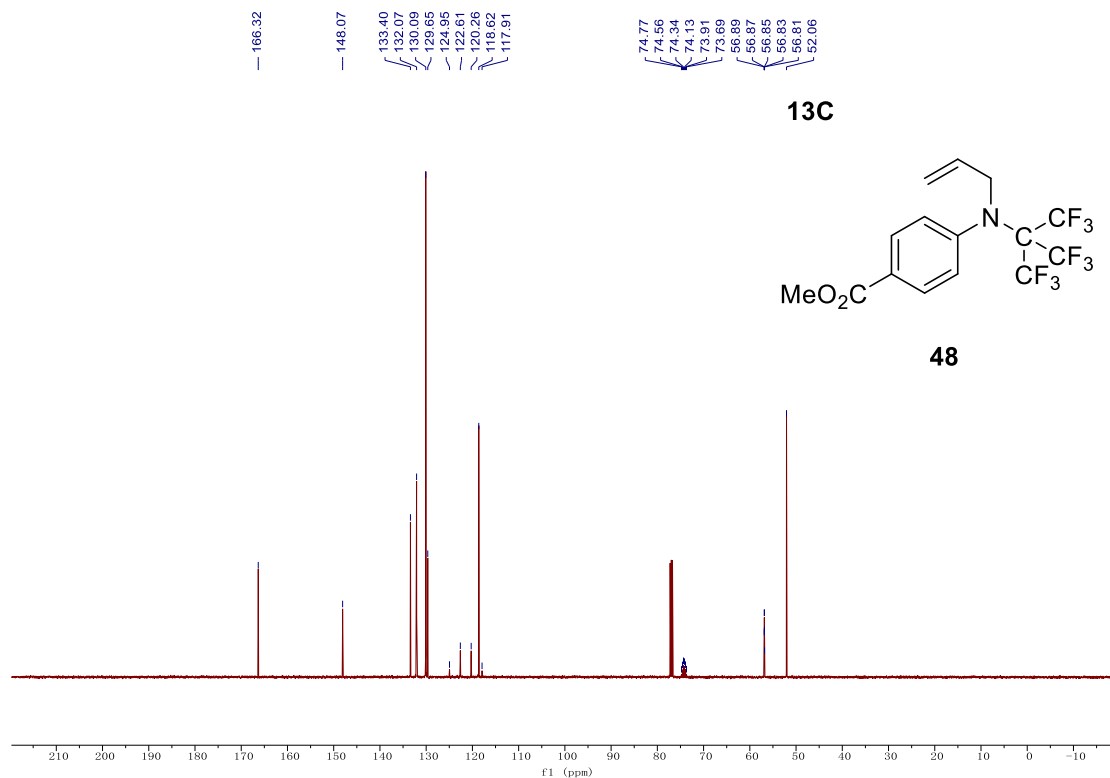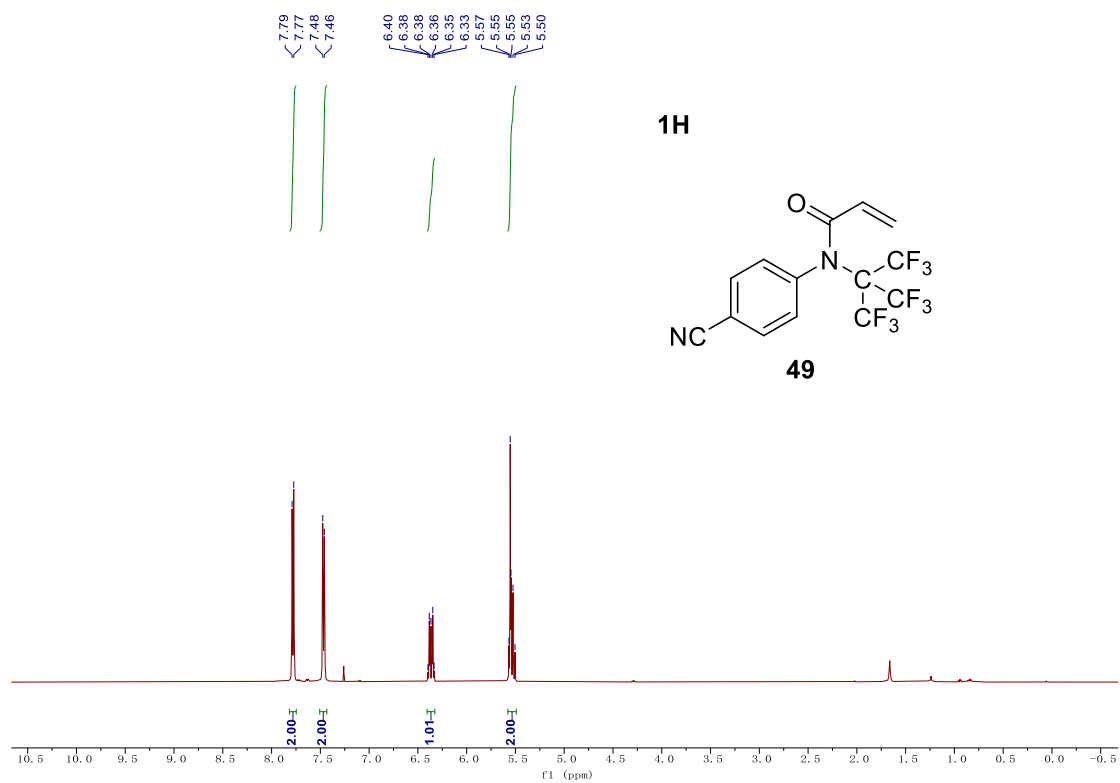

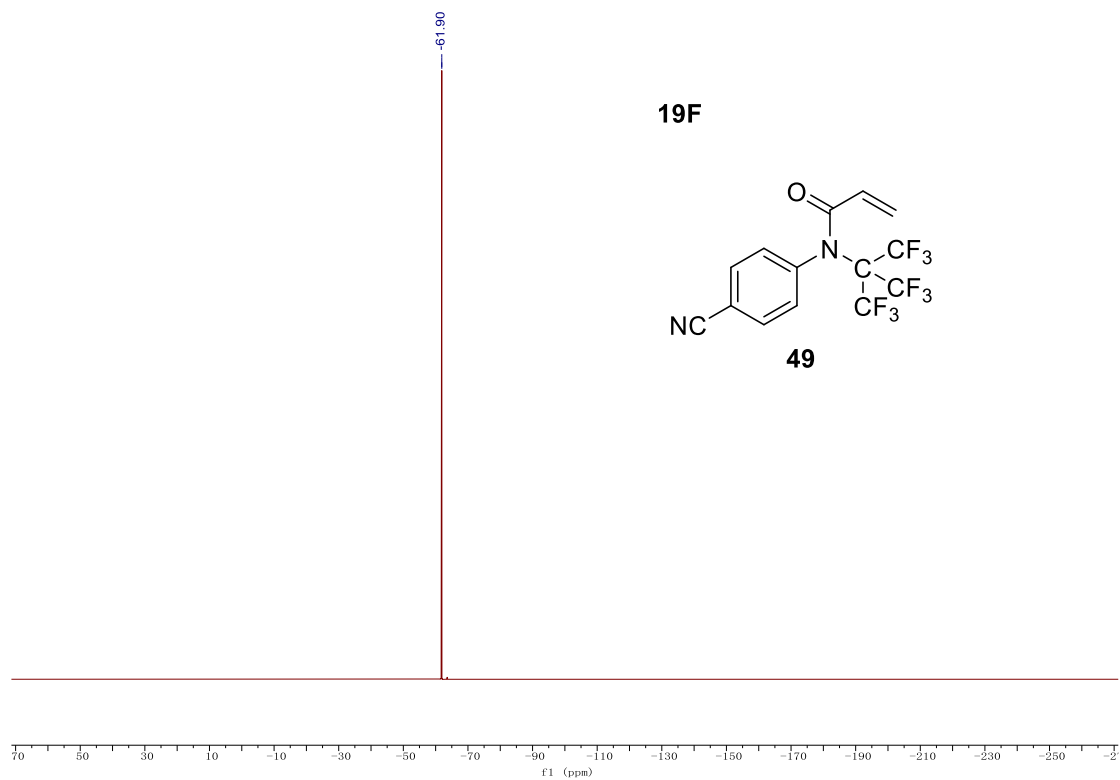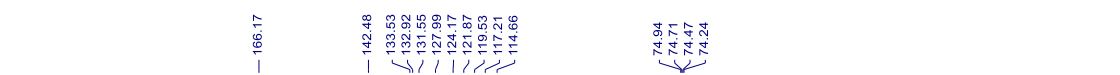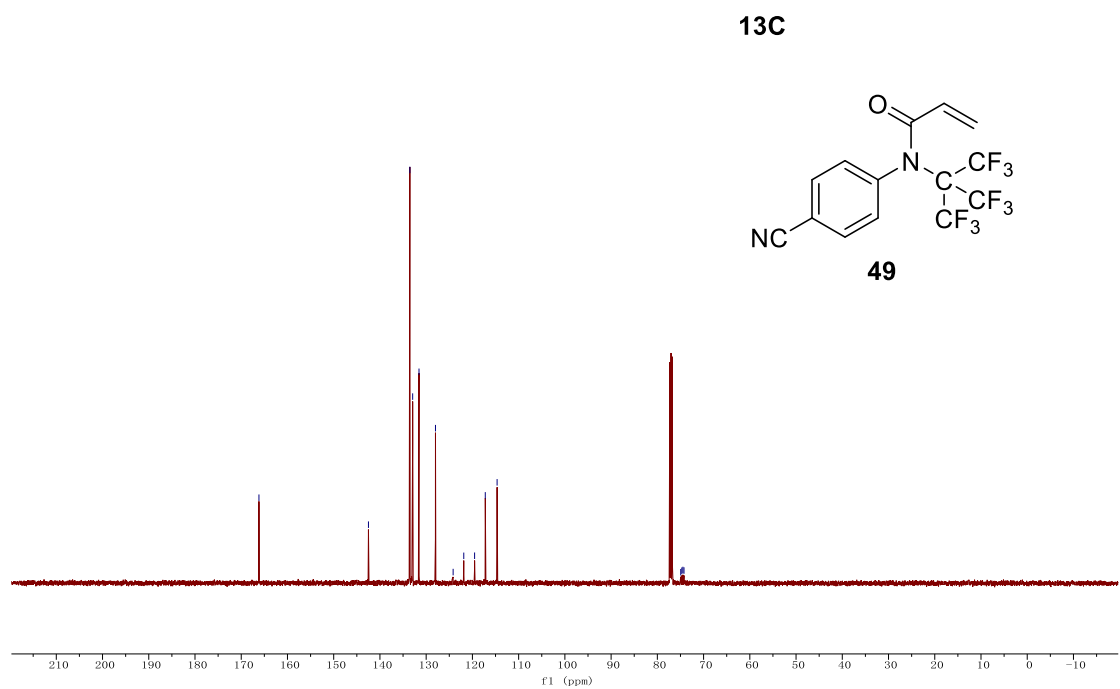

Supplement: d4sc06335j1.pdf [file d4sc06335j1.pdf]
